# Supplementary material for: DFT and ONIOM Simulation of 1,3-Butadiene Polymerization Catalyzed by Neodymium-Based Ziegler–Natta System
Source: MDPI journal article supplement (doi:10.3390/polym15051166), 2023-02-25
Supplement: s1 [file s1]

# DFT and ONIOM Simulation of 1,3-Butadiene Polymerization Catalyzed by Neodymium Based Ziegler–Natta System

Alexey N. Masliy <sup>1</sup>, Ildar G. Akhmetov <sup>2</sup>, Andrey M. Kuznetsov <sup>1</sup> and Ilsiya M. Davletbaeva <sup>3,\*</sup>

<sup>1</sup> Department of Inorganic Chemistry, Kazan National Research Technological University, K. Marx Street 68, 420015 Kazan, Russia

<sup>2</sup> Nizhnekamsk Chemical and Technological Institute (Branch), Kazan National Research, Technological University, K. Marx Street 68, 420015 Kazan, Russia

<sup>3</sup> Technology of Synthetic Rubber Department, Kazan National Research Technological University, K. Marx Street 68, 420015 Kazan, Russia

\* Correspondence: davletbaeva09@mail.ru

**Supplementary Materials**

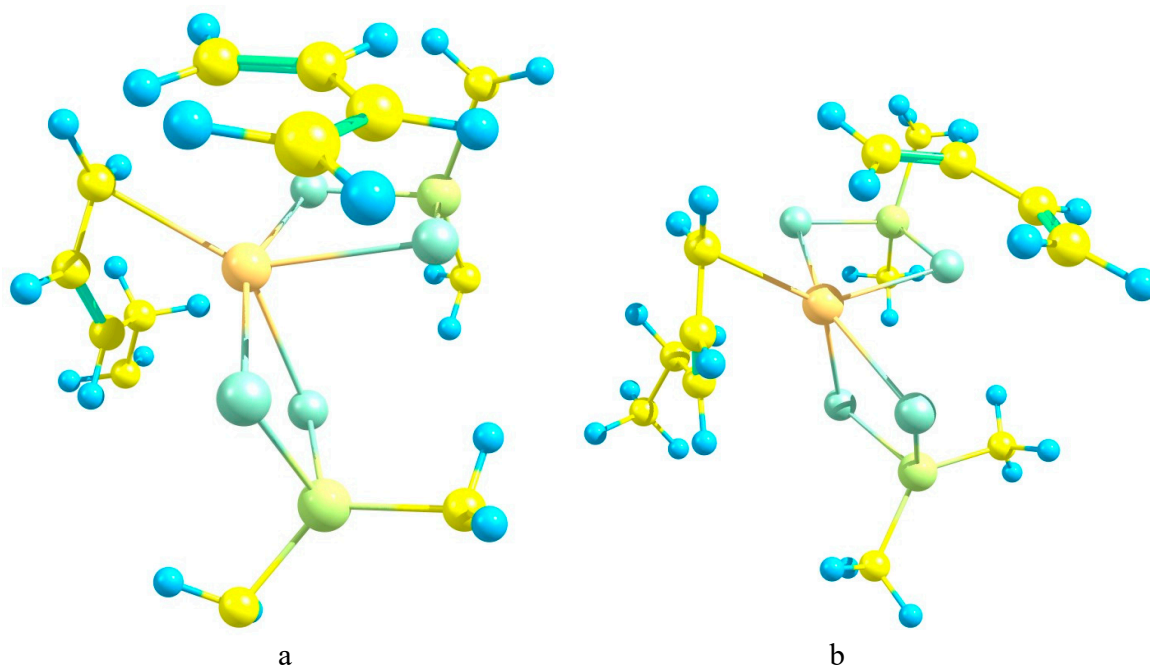

**Figure S1. Part of AS (43 atoms), which was calculate on a higher level of accuracy QM1 — a, broken bonds are supplemented by hydrogen atoms — b. This part is the same for all systems calculated in the framework of ONIOM.**

**TABLE S1:** Atomic Cartesian coordinates (in Å) for AS+ $\eta$ -cis-C<sub>4</sub>H<sub>6</sub> optimized at the B3LYP/def2-TZVP level (Fig. 1A)

| Atom | x            | y            | z            |
|------|--------------|--------------|--------------|
| C    | 0.607563000  | -0.215385000 | -0.979869000 |
| C    | 0.364207000  | 0.103872000  | 0.509050000  |
| C    | 1.620071000  | 0.675629000  | 1.175601000  |
| Al   | 1.955518000  | -1.587784000 | -1.377033000 |
| C    | 2.254678000  | -3.227010000 | -0.334652000 |
| C    | 1.001280000  | -3.930170000 | 0.223202000  |
| C    | 0.057510000  | -4.381964000 | -0.896894000 |
| Cl   | 4.020009000  | -0.603238000 | -1.667599000 |
| Nd   | 3.875755000  | -0.631791000 | -4.514503000 |
| C    | 5.386877000  | -2.174332000 | -5.597940000 |
| Cl   | 1.986480000  | 1.583520000  | -4.198759000 |
| Al   | 3.626287000  | 3.120063000  | -3.765067000 |
| C    | 3.488899000  | 4.502849000  | -5.158466000 |
| C    | 4.203030000  | 5.838861000  | -4.873455000 |
| C    | 5.706022000  | 5.643050000  | -4.647267000 |
| Cl   | 5.420593000  | 1.723373000  | -4.297081000 |
| Cl   | 1.669487000  | -2.164521000 | -3.611618000 |
| C    | 3.754366000  | 3.439928000  | -1.831821000 |
| C    | 2.839675000  | 4.527366000  | -1.233565000 |
| C    | 1.357709000  | 4.203977000  | -1.451280000 |
| C    | -0.819420000 | 1.061485000  | 0.693969000  |
| C    | 1.374760000  | -5.120124000 | 1.115159000  |
| C    | 3.959773000  | 6.858317000  | -5.992450000 |
| C    | 3.125671000  | 4.739894000  | 0.258137000  |
| C    | 3.328730000  | 0.575522000  | -7.235209000 |
| C    | 2.155758000  | -0.290125000 | -7.054870000 |
| C    | 2.130026000  | -1.629275000 | -7.131209000 |
| H    | 0.877728000  | 0.706299000  | -1.509628000 |
| H    | -0.333004000 | -0.548988000 | -1.437851000 |
| H    | 2.824328000  | -3.939323000 | -0.947041000 |
| H    | 2.920373000  | -2.961444000 | 0.497296000  |
| H    | 3.861026000  | 4.092102000  | -6.107599000 |
| H    | 2.420049000  | 4.692200000  | -5.322778000 |
| H    | 3.573653000  | 2.489539000  | -1.313356000 |
| H    | 4.801305000  | 3.692120000  | -1.617633000 |
| H    | 6.335468000  | -1.760587000 | -5.947162000 |
| H    | 4.960479000  | -2.799219000 | -6.385841000 |
| H    | 3.050420000  | 5.475886000  | -1.743935000 |
| H    | 2.495773000  | 5.528970000  | 0.679799000  |
| H    | 2.933958000  | 3.820736000  | 0.819572000  |
| H    | 4.170289000  | 5.015910000  | 0.421665000  |
| H    | 0.713681000  | 4.955434000  | -0.987263000 |

|   |              |              |              |
|---|--------------|--------------|--------------|
| H | 1.100685000  | 4.159326000  | -2.513339000 |
| H | 1.109211000  | 3.232951000  | -1.015636000 |
| H | 3.783798000  | 6.259911000  | -3.950987000 |
| H | 6.207411000  | 6.596703000  | -4.463334000 |
| H | 5.908153000  | 4.995645000  | -3.789422000 |
| H | 6.170268000  | 5.183191000  | -5.525191000 |
| H | 4.431743000  | 7.820012000  | -5.770168000 |
| H | 4.372134000  | 6.492102000  | -6.938089000 |
| H | 2.891043000  | 7.031738000  | -6.140246000 |
| H | 0.110312000  | -0.829584000 | 1.027176000  |
| H | 0.453704000  | -3.212702000 | 0.847217000  |
| H | 1.439266000  | 0.912558000  | 2.227207000  |
| H | 2.459899000  | -0.023562000 | 1.133537000  |
| H | 1.933958000  | 1.594935000  | 0.674496000  |
| H | -1.015227000 | 1.258429000  | 1.752364000  |
| H | -0.616207000 | 2.019899000  | 0.207313000  |
| H | -1.729797000 | 0.649615000  | 0.251577000  |
| H | -0.814145000 | -4.904589000 | -0.494730000 |
| H | -0.308659000 | -3.539345000 | -1.489931000 |
| H | 0.573273000  | -5.064489000 | -1.579311000 |
| H | 0.487817000  | -5.594891000 | 1.545258000  |
| H | 1.913081000  | -5.876350000 | 0.535049000  |
| H | 2.023410000  | -4.806109000 | 1.936499000  |
| H | 3.172456000  | 1.620218000  | -6.989939000 |
| C | 4.553614000  | 0.185879000  | -7.620219000 |
| H | 1.244885000  | 0.225614000  | -6.773392000 |
| H | 1.217802000  | -2.173813000 | -6.929714000 |
| H | 2.996804000  | -2.214846000 | -7.409559000 |
| H | 5.365843000  | 0.898708000  | -7.666576000 |
| H | 4.778538000  | -0.830021000 | -7.913389000 |
| C | 5.526641000  | -2.926335000 | -4.278555000 |
| H | 4.677101000  | -2.665424000 | -3.584994000 |
| C | 5.395802000  | -4.447531000 | -4.412574000 |
| C | 6.789255000  | -2.524310000 | -3.508442000 |
| H | 6.805885000  | -2.968285000 | -2.511466000 |
| H | 7.675596000  | -2.853948000 | -4.055531000 |
| H | 6.862389000  | -1.438832000 | -3.389755000 |
| H | 5.408617000  | -4.935501000 | -3.434465000 |
| H | 4.462775000  | -4.713702000 | -4.913433000 |
| H | 6.225343000  | -4.838849000 | -5.005956000 |

**TABLE S2:** Atomic Cartesian coordinates (in Å) for AS+ $\eta$ -trans-C<sub>4</sub>H<sub>6</sub> optimized at the B3LYP/def2-TZVP level (Fig. 1B)

| Atom | x            | y            | z            |
|------|--------------|--------------|--------------|
| C    | 0.597658000  | -0.206133000 | -1.066760000 |
| C    | 0.331391000  | 0.138403000  | 0.412308000  |
| C    | 1.619373000  | 0.545293000  | 1.136372000  |
| Al   | 1.863225000  | -1.667707000 | -1.419766000 |
| C    | 2.055818000  | -3.313262000 | -0.360888000 |
| C    | 0.781172000  | -3.867679000 | 0.305455000  |
| C    | -0.316196000 | -4.162763000 | -0.722825000 |
| Cl   | 3.978098000  | -0.802711000 | -1.704541000 |
| Nd   | 3.835618000  | -0.725700000 | -4.550825000 |
| C    | 5.326186000  | -2.185905000 | -5.723155000 |
| Cl   | 2.019980000  | 1.547962000  | -4.304389000 |
| Al   | 3.694006000  | 3.014910000  | -3.730145000 |
| C    | 3.652564000  | 4.458037000  | -5.073114000 |
| C    | 3.998144000  | 5.875536000  | -4.575235000 |
| C    | 5.414606000  | 5.940718000  | -3.994473000 |
| Cl   | 5.449185000  | 1.577455000  | -4.259948000 |
| Cl   | 1.601209000  | -2.237777000 | -3.659582000 |
| C    | 3.749344000  | 3.223129000  | -1.774313000 |
| C    | 3.037286000  | 4.449801000  | -1.170595000 |
| C    | 1.548959000  | 4.471494000  | -1.532670000 |
| C    | -0.730121000 | 1.235695000  | 0.552145000  |
| C    | 1.083198000  | -5.119298000 | 1.137794000  |
| C    | 3.827921000  | 6.919983000  | -5.684352000 |
| C    | 3.216359000  | 4.517024000  | 0.350918000  |
| C    | 3.537977000  | -0.016867000 | -7.594822000 |
| C    | 2.246305000  | -0.555051000 | -7.183669000 |
| C    | 1.978360000  | -1.866330000 | -7.103873000 |
| H    | 0.951808000  | 0.690822000  | -1.590094000 |
| H    | -0.350268000 | -0.470403000 | -1.553731000 |
| H    | 2.495977000  | -4.091185000 | -0.999655000 |
| H    | 2.808735000  | -3.113751000 | 0.412861000  |
| H    | 4.328562000  | 4.196159000  | -5.898333000 |
| H    | 2.645538000  | 4.463940000  | -5.509386000 |
| H    | 3.339281000  | 2.308839000  | -1.326721000 |
| H    | 4.806844000  | 3.238102000  | -1.480759000 |
| H    | 5.920702000  | -1.642679000 | -6.465333000 |
| H    | 4.950253000  | -3.106977000 | -6.174442000 |
| H    | 3.494613000  | 5.353985000  | -1.589223000 |
| H    | 2.754078000  | 5.416028000  | 0.769618000  |
| H    | 2.755759000  | 3.649450000  | 0.831721000  |
| H    | 4.275013000  | 4.523925000  | 0.621711000  |
| H    | 1.040247000  | 5.327851000  | -1.082667000 |

|   |              |              |              |
|---|--------------|--------------|--------------|
| H | 1.394307000  | 4.527936000  | -2.614255000 |
| H | 1.057714000  | 3.562549000  | -1.175270000 |
| H | 3.298067000  | 6.136644000  | -3.772593000 |
| H | 5.658008000  | 6.949467000  | -3.651184000 |
| H | 5.536896000  | 5.265615000  | -3.143054000 |
| H | 6.152321000  | 5.657382000  | -4.751674000 |
| H | 4.033527000  | 7.930654000  | -5.319290000 |
| H | 4.515450000  | 6.715735000  | -6.511387000 |
| H | 2.811307000  | 6.905376000  | -6.084802000 |
| H | -0.058838000 | -0.757338000 | 0.911246000  |
| H | 0.394101000  | -3.103905000 | 0.991179000  |
| H | 1.422760000  | 0.824020000  | 2.174792000  |
| H | 2.354415000  | -0.264790000 | 1.147254000  |
| H | 2.084456000  | 1.401629000  | 0.641284000  |
| H | -0.930557000 | 1.471406000  | 1.601592000  |
| H | -0.398952000 | 2.153577000  | 0.057878000  |
| H | -1.671498000 | 0.931898000  | 0.087471000  |
| H | -1.207277000 | -4.578591000 | -0.245427000 |
| H | -0.622857000 | -3.261532000 | -1.261426000 |
| H | 0.036050000  | -4.887035000 | -1.463775000 |
| H | 0.187881000  | -5.491954000 | 1.644430000  |
| H | 1.464749000  | -5.920380000 | 0.496741000  |
| H | 1.840669000  | -4.912269000 | 1.897649000  |
| H | 4.252214000  | -0.722526000 | -8.005740000 |
| C | 3.888296000  | 1.266326000  | -7.435051000 |
| H | 1.488617000  | 0.164863000  | -6.888750000 |
| H | 1.018216000  | -2.221657000 | -6.756146000 |
| H | 2.713639000  | -2.611178000 | -7.384596000 |
| H | 4.871807000  | 1.619702000  | -7.713603000 |
| H | 3.203184000  | 1.992765000  | -7.015681000 |
| C | 6.107458000  | -2.438105000 | -4.439292000 |
| H | 5.924887000  | -1.599702000 | -3.708439000 |
| C | 5.636944000  | -3.706523000 | -3.717377000 |
| C | 7.630598000  | -2.418989000 | -4.613928000 |
| H | 8.144714000  | -2.515474000 | -3.653836000 |
| H | 7.938106000  | -3.247937000 | -5.255775000 |
| H | 7.954257000  | -1.488219000 | -5.083726000 |
| H | 6.118582000  | -3.813621000 | -2.743840000 |
| H | 4.555009000  | -3.710729000 | -3.551849000 |
| H | 5.875443000  | -4.583734000 | -4.323685000 |

**TABLE S3:** Atomic Cartesian coordinates (in Å) for i-C<sub>4</sub>H<sub>9</sub>- $\pi$ -anti-H<sub>2</sub>CHC <sup>$\gamma$</sup> HC <sup>$\beta$</sup> H<sub>2</sub>C <sup>$\alpha$</sup> -AS optimized at the B3LYP/def2-TZVP level (Fig. 2A)

| Atom | x            | y            | z            |
|------|--------------|--------------|--------------|
| C    | 1.408957000  | -1.785134000 | 1.208360000  |
| C    | 1.609109000  | -2.523566000 | 2.546362000  |
| C    | 2.959212000  | -2.178496000 | 3.183098000  |
| Al   | 2.691106000  | -2.182031000 | -0.224234000 |
| C    | 3.558181000  | -3.906397000 | -0.587195000 |
| C    | 2.701730000  | -5.179490000 | -0.433790000 |
| C    | 1.448819000  | -5.136294000 | -1.315714000 |
| Cl   | 4.389014000  | -0.610206000 | -0.293572000 |
| Nd   | 3.702296000  | 0.389168000  | -2.857297000 |
| C    | 5.957577000  | -0.627008000 | -3.734588000 |
| C    | 5.566682000  | 0.242461000  | -4.759592000 |
| C    | 4.340801000  | 0.206768000  | -5.408384000 |
| Cl   | 1.726311000  | 2.084102000  | -4.015263000 |
| Al   | 3.002580000  | 3.973087000  | -3.695857000 |
| C    | 3.984619000  | 4.248483000  | -5.376028000 |
| C    | 4.740590000  | 5.581040000  | -5.541846000 |
| C    | 5.785686000  | 5.780084000  | -4.439104000 |
| Cl   | 4.477961000  | 2.983320000  | -2.178578000 |
| Cl   | 1.677017000  | -1.460121000 | -2.185134000 |
| C    | 1.987471000  | 5.318886000  | -2.689527000 |
| C    | 1.261692000  | 6.392655000  | -3.525820000 |
| C    | 0.233609000  | 5.769524000  | -4.476376000 |
| C    | 0.465230000  | -2.231628000 | 3.524612000  |
| C    | 3.519577000  | -6.440421000 | -0.736161000 |
| C    | 5.396850000  | 5.685869000  | -6.923334000 |
| C    | 0.593482000  | 7.443533000  | -2.632087000 |
| H    | 1.394211000  | -0.702383000 | 1.391727000  |
| H    | 0.414526000  | -2.025137000 | 0.809257000  |
| H    | 3.965633000  | -3.872119000 | -1.606719000 |
| H    | 4.433205000  | -3.978800000 | 0.071647000  |
| H    | 4.691854000  | 3.416823000  | -5.501254000 |
| H    | 3.261526000  | 4.138885000  | -6.194926000 |
| H    | 1.257334000  | 4.807336000  | -2.048357000 |
| H    | 2.687822000  | 5.809432000  | -2.001424000 |
| H    | 5.618472000  | -1.660608000 | -3.719222000 |
| H    | 6.879815000  | -0.442851000 | -3.199517000 |
| H    | 6.144111000  | 1.157305000  | -4.877944000 |
| H    | 2.008242000  | 6.911544000  | -4.140313000 |
| H    | 0.116709000  | 8.229624000  | -3.225066000 |
| H    | -0.176836000 | 6.978848000  | -2.008709000 |
| H    | 1.321216000  | 7.914620000  | -1.966911000 |
| H    | -0.292150000 | 6.535712000  | -5.051782000 |

|   |              |              |              |
|---|--------------|--------------|--------------|
| H | 0.701434000  | 5.085110000  | -5.190126000 |
| H | -0.512628000 | 5.199518000  | -3.914586000 |
| H | 4.013412000  | 6.398776000  | -5.461345000 |
| H | 6.333306000  | 6.716024000  | -4.575116000 |
| H | 5.331196000  | 5.805475000  | -3.444883000 |
| H | 6.511693000  | 4.961350000  | -4.447606000 |
| H | 5.899063000  | 6.648327000  | -7.058221000 |
| H | 6.144614000  | 4.896537000  | -7.051094000 |
| H | 4.656663000  | 5.575265000  | -7.719553000 |
| H | 1.602485000  | -3.602904000 | 2.347640000  |
| H | 2.369094000  | -5.243829000 | 0.609784000  |
| H | 3.090990000  | -2.690393000 | 4.139675000  |
| H | 3.797084000  | -2.462242000 | 2.539573000  |
| H | 3.032826000  | -1.101924000 | 3.364781000  |
| H | 0.586071000  | -2.784351000 | 4.460885000  |
| H | 0.432699000  | -1.164458000 | 3.765885000  |
| H | -0.500494000 | -2.504429000 | 3.092088000  |
| H | 0.870301000  | -6.059154000 | -1.225967000 |
| H | 0.788338000  | -4.307212000 | -1.046868000 |
| H | 1.722727000  | -5.010789000 | -2.367102000 |
| H | 2.929027000  | -7.349085000 | -0.586449000 |
| H | 3.862598000  | -6.430330000 | -1.775698000 |
| H | 4.402400000  | -6.500421000 | -0.095076000 |
| C | 3.467977000  | -1.022534000 | -5.445818000 |
| H | 4.097654000  | 1.002202000  | -6.099779000 |
| C | 3.992932000  | -2.157380000 | -6.349796000 |
| H | 3.353621000  | -1.488275000 | -4.448727000 |
| H | 2.456770000  | -0.742475000 | -5.745469000 |
| C | 3.290514000  | -3.513387000 | -6.148731000 |
| H | 3.883742000  | -1.835632000 | -7.389359000 |
| H | 5.064019000  | -2.278210000 | -6.168713000 |
| H | 3.686621000  | -4.179449000 | -6.923718000 |
| C | 3.628507000  | -4.137870000 | -4.789764000 |
| C | 1.774005000  | -3.420262000 | -6.346485000 |
| H | 3.160910000  | -5.119000000 | -4.682720000 |
| H | 4.707013000  | -4.264081000 | -4.666313000 |
| H | 3.267240000  | -3.520441000 | -3.963960000 |
| H | 1.321287000  | -4.414192000 | -6.336756000 |
| H | 1.304123000  | -2.840645000 | -5.547779000 |
| H | 1.524615000  | -2.945253000 | -7.298865000 |



**TABLE S4:** Atomic Cartesian coordinates (in Å) for i-C<sub>4</sub>H<sub>9</sub>- $\pi$ -sin-H<sub>2</sub>CHC <sup>$\gamma$</sup> HC <sup>$\beta$</sup> H<sub>2</sub>C <sup>$\alpha$</sup> -AS optimized at the B3LYP/def2-TZVP level (Fig. 2B)

| Atom | x            | y            | z            |
|------|--------------|--------------|--------------|
| C    | 1.060933000  | -1.064946000 | -0.121349000 |
| C    | 0.464215000  | -0.163514000 | 0.977824000  |
| C    | 1.551311000  | 0.628877000  | 1.711638000  |
| Al   | 2.319571000  | -2.468368000 | 0.435048000  |
| C    | 2.121401000  | -3.635488000 | 1.998075000  |
| C    | 0.672422000  | -4.017096000 | 2.366389000  |
| C    | -0.017648000 | -4.783956000 | 1.232931000  |
| Cl   | 4.467607000  | -1.611183000 | 0.402477000  |
| Nd   | 4.637370000  | -1.963805000 | -2.427693000 |
| C    | 6.457732000  | -3.288609000 | -3.504255000 |
| C    | 5.701224000  | -3.033178000 | -4.683884000 |
| Cl   | 2.588175000  | -0.403326000 | -3.578519000 |
| Al   | 3.760925000  | 1.579227000  | -3.390740000 |
| C    | 4.286437000  | 2.064228000  | -5.219526000 |
| C    | 4.836771000  | 3.482806000  | -5.459036000 |
| C    | 6.084064000  | 3.757289000  | -4.612242000 |
| Cl   | 5.614991000  | 0.660198000  | -2.318018000 |
| Cl   | 2.674449000  | -3.742610000 | -1.498503000 |
| C    | 2.879242000  | 2.709424000  | -2.053630000 |
| C    | 1.786303000  | 3.668780000  | -2.565538000 |
| C    | 0.667251000  | 2.919072000  | -3.297351000 |
| C    | -0.590579000 | 0.790732000  | 0.404557000  |
| C    | 0.618395000  | -4.826402000 | 3.666981000  |
| C    | 5.139652000  | 3.714708000  | -6.944076000 |
| C    | 1.206301000  | 4.508700000  | -1.421609000 |
| C    | 5.390300000  | -1.788499000 | -5.159887000 |
| H    | 1.544610000  | -0.432962000 | -0.875999000 |
| H    | 0.246010000  | -1.570094000 | -0.656808000 |
| H    | 2.712718000  | -4.549102000 | 1.854667000  |
| H    | 2.585818000  | -3.116355000 | 2.846712000  |
| H    | 5.028515000  | 1.334466000  | -5.566136000 |
| H    | 3.408006000  | 1.904425000  | -5.858037000 |
| H    | 2.452893000  | 2.052216000  | -1.284686000 |
| H    | 3.658321000  | 3.288464000  | -1.541416000 |
| H    | 6.662955000  | -4.318673000 | -3.234554000 |
| H    | 7.274349000  | -2.599018000 | -3.271370000 |
| C    | 4.524437000  | -1.503529000 | -6.351077000 |
| H    | 5.153153000  | -3.873522000 | -5.110758000 |
| H    | 2.246254000  | 4.360218000  | -3.283124000 |
| H    | 0.455339000  | 5.218076000  | -1.781590000 |
| H    | 0.729795000  | 3.861636000  | -0.678974000 |
| H    | 1.991054000  | 5.074700000  | -0.913815000 |

|   |              |              |               |
|---|--------------|--------------|---------------|
| H | -0.115480000 | 3.603797000  | -3.633452000  |
| H | 1.038263000  | 2.388283000  | -4.179066000  |
| H | 0.205398000  | 2.178044000  | -2.639107000  |
| H | 4.067202000  | 4.205870000  | -5.160952000  |
| H | 6.481820000  | 4.757083000  | -4.803511000  |
| H | 5.874149000  | 3.685541000  | -3.541372000  |
| H | 6.871704000  | 3.033277000  | -4.842612000  |
| H | 5.493499000  | 4.732918000  | -7.130216000  |
| H | 5.914836000  | 3.021647000  | -7.286160000  |
| H | 4.251448000  | 3.546171000  | -7.557820000  |
| H | -0.037526000 | -0.801753000 | 1.715812000   |
| H | 0.105475000  | -3.092499000 | 2.531954000   |
| H | 1.119976000  | 1.281378000  | 2.474966000   |
| H | 2.272230000  | -0.027642000 | 2.206768000   |
| H | 2.107139000  | 1.256745000  | 1.009251000   |
| H | -1.049874000 | 1.399900000  | 1.188680000   |
| H | -0.136566000 | 1.469444000  | -0.322884000  |
| H | -1.383947000 | 0.238988000  | -0.105426000  |
| H | -1.035671000 | -5.069480000 | 1.509639000   |
| H | -0.081743000 | -4.190175000 | 0.316565000   |
| H | 0.534454000  | -5.698301000 | 0.995172000   |
| H | -0.411858000 | -5.060500000 | 3.950922000   |
| H | 1.157706000  | -5.771657000 | 3.550911000   |
| H | 1.080686000  | -4.277903000 | 4.491170000   |
| H | 5.981313000  | -0.939722000 | -4.806590000  |
| C | 5.333020000  | -0.949613000 | -7.535290000  |
| H | 3.991920000  | -2.412795000 | -6.641244000  |
| H | 5.974235000  | -0.140976000 | -7.168642000  |
| H | 6.008312000  | -1.727028000 | -7.911894000  |
| C | 4.481346000  | -0.406272000 | -8.690640000  |
| C | 5.367575000  | 0.298786000  | -9.720897000  |
| C | 3.641579000  | -1.500097000 | -9.357003000  |
| H | 3.796069000  | 0.340208000  | -8.269684000  |
| H | 3.057163000  | -1.092339000 | -10.185231000 |
| H | 4.286958000  | -2.286968000 | -9.760368000  |
| H | 2.943809000  | -1.964320000 | -8.657687000  |
| H | 4.770680000  | 0.717726000  | -10.534719000 |
| H | 5.933577000  | 1.114508000  | -9.264208000  |
| H | 6.083944000  | -0.402477000 | -10.160219000 |
| H | 3.762470000  | -0.766165000 | -6.083780000  |

**TABLE S5:** Atomic Cartesian coordinates (in Å) for i-C<sub>4</sub>H<sub>9</sub>- $\pi$ -anti-H<sub>2</sub>CHC <sup>$\gamma$</sup> HC <sup>$\beta$</sup> H<sub>2</sub>C <sup>$\alpha$</sup> -AS+cis-C<sub>4</sub>H<sub>6</sub> optimized at the B3LYP/def2-TZVP level (Fig. 3A)

| Atom | x            | y            | z            |
|------|--------------|--------------|--------------|
| C    | 0.532590000  | 0.009459000  | 0.584436000  |
| C    | 0.465586000  | 0.259264000  | 2.104269000  |
| C    | 1.791442000  | -0.078967000 | 2.794189000  |
| Al   | 0.920920000  | -1.823410000 | -0.001228000 |
| C    | 0.257726000  | -3.465673000 | 0.851093000  |
| C    | -1.181337000 | -3.417166000 | 1.404328000  |
| C    | -2.201861000 | -3.101405000 | 0.305297000  |
| Cl   | 3.239515000  | -2.078964000 | -0.144470000 |
| Nd   | 3.338752000  | -1.796909000 | -2.928411000 |
| C    | 2.756630000  | -4.342538000 | -3.527602000 |
| C    | 3.733060000  | -3.967425000 | -4.440903000 |
| Cl   | 2.644357000  | 0.996264000  | -2.585985000 |
| Al   | 4.827633000  | 1.645652000  | -2.325151000 |
| C    | 5.115643000  | 3.272164000  | -3.388944000 |
| C    | 6.385704000  | 4.082429000  | -3.061530000 |
| C    | 7.654877000  | 3.252283000  | -3.281906000 |
| Cl   | 5.665041000  | -0.194353000 | -3.447473000 |
| Cl   | 0.545212000  | -1.928918000 | -2.267644000 |
| C    | 5.323858000  | 1.390903000  | -0.438237000 |
| C    | 5.109138000  | 2.583032000  | 0.515916000  |
| C    | 3.662554000  | 3.086938000  | 0.477823000  |
| C    | 0.055417000  | 1.703542000  | 2.416770000  |
| C    | -1.553883000 | -4.722547000 | 2.117014000  |
| C    | 6.449405000  | 5.382066000  | -3.871950000 |
| C    | 5.512963000  | 2.228821000  | 1.951858000  |
| C    | 4.978167000  | -3.442704000 | -4.100773000 |
| C    | 4.150605000  | -1.069081000 | -6.735823000 |
| C    | 3.093553000  | -0.501085000 | -5.896710000 |
| C    | 1.933336000  | -1.091277000 | -5.566721000 |
| H    | 1.273943000  | 0.682212000  | 0.136961000  |
| H    | -0.425354000 | 0.294651000  | 0.129580000  |
| H    | 0.340628000  | -4.295834000 | 0.136680000  |
| H    | 0.949329000  | -3.712359000 | 1.667283000  |
| H    | 5.120959000  | 3.011584000  | -4.456076000 |
| H    | 4.233255000  | 3.910442000  | -3.249423000 |
| H    | 4.760890000  | 0.527099000  | -0.059888000 |
| H    | 6.377261000  | 1.085070000  | -0.403145000 |
| H    | 1.768752000  | -4.623500000 | -3.863084000 |
| H    | 3.019222000  | -4.666302000 | -2.521882000 |
| C    | 5.611959000  | -3.694126000 | -2.753318000 |
| H    | 3.428608000  | -3.845124000 | -5.477960000 |
| H    | 5.754697000  | 3.406346000  | 0.185442000  |

|   |              |              |              |
|---|--------------|--------------|--------------|
| H | 5.400330000  | 3.083652000  | 2.625486000  |
| H | 4.887310000  | 1.416412000  | 2.333911000  |
| H | 6.552834000  | 1.895621000  | 1.996277000  |
| H | 3.503922000  | 3.899826000  | 1.191189000  |
| H | 3.387262000  | 3.460197000  | -0.512805000 |
| H | 2.967887000  | 2.281780000  | 0.727951000  |
| H | 6.351910000  | 4.359758000  | -2.000407000 |
| H | 8.554709000  | 3.837342000  | -3.075768000 |
| H | 7.681625000  | 2.368907000  | -2.637234000 |
| H | 7.710169000  | 2.905432000  | -4.318391000 |
| H | 7.331290000  | 5.975814000  | -3.613516000 |
| H | 6.495297000  | 5.161452000  | -4.943169000 |
| H | 5.563526000  | 5.997179000  | -3.696073000 |
| H | -0.304272000 | -0.398042000 | 2.527767000  |
| H | -1.236266000 | -2.611622000 | 2.147136000  |
| H | 1.745320000  | 0.127815000  | 3.866508000  |
| H | 2.057512000  | -1.132606000 | 2.672203000  |
| H | 2.606591000  | 0.515818000  | 2.373651000  |
| H | -0.033938000 | 1.872028000  | 3.494170000  |
| H | 0.799226000  | 2.405077000  | 2.027510000  |
| H | -0.904625000 | 1.946298000  | 1.954648000  |
| H | -3.220469000 | -3.087319000 | 0.701417000  |
| H | -2.016339000 | -2.127887000 | -0.157404000 |
| H | -2.158457000 | -3.856099000 | -0.485911000 |
| H | -2.558688000 | -4.673458000 | 2.547112000  |
| H | -1.529630000 | -5.560640000 | 1.413240000  |
| H | -0.850228000 | -4.944199000 | 2.923077000  |
| H | 5.150542000  | -0.695901000 | -6.539925000 |
| C | 3.961043000  | -1.958562000 | -7.711081000 |
| H | 3.291351000  | 0.490304000  | -5.499399000 |
| H | 1.183715000  | -0.559130000 | -4.992949000 |
| H | 1.680613000  | -2.089647000 | -5.904898000 |
| H | 4.791757000  | -2.337355000 | -8.292274000 |
| H | 2.973099000  | -2.320253000 | -7.971965000 |
| H | 5.626010000  | -3.091799000 | -4.893281000 |
| C | 7.122265000  | -3.435300000 | -2.728312000 |
| H | 5.168592000  | -3.084931000 | -1.931607000 |
| H | 7.605890000  | -4.238358000 | -3.293065000 |
| H | 7.329418000  | -2.506048000 | -3.264192000 |
| C | 7.752515000  | -3.345890000 | -1.326423000 |
| C | 7.324015000  | -2.080075000 | -0.574503000 |
| C | 7.491220000  | -4.599779000 | -0.485964000 |
| H | 8.834417000  | -3.275824000 | -1.487733000 |
| H | 8.050114000  | -4.560476000 | 0.451822000  |
| H | 6.432571000  | -4.692091000 | -0.229436000 |
| H | 7.788948000  | -5.506882000 | -1.018556000 |

|   |             |              |              |
|---|-------------|--------------|--------------|
| H | 7.869799000 | -1.989122000 | 0.367282000  |
| H | 7.512353000 | -1.182677000 | -1.165919000 |
| H | 6.259650000 | -2.093060000 | -0.327699000 |
| H | 5.391211000 | -4.713733000 | -2.421650000 |

**TABLE S6:** Atomic Cartesian coordinates (in Å) for i-C<sub>4</sub>H<sub>9</sub>- $\pi$ -anti-H<sub>2</sub>CHC <sup>$\gamma$</sup> HC <sup>$\beta$</sup> H<sub>2</sub>C <sup>$\alpha$</sup> -AS+trans-C<sub>4</sub>H<sub>6</sub> optimized at the B3LYP/def2-TZVP level (Fig. 3B)

| Atom | x            | y            | z            |
|------|--------------|--------------|--------------|
| C    | 0.779842000  | -0.039676000 | 0.409279000  |
| C    | 0.810844000  | 0.076851000  | 1.946376000  |
| C    | 2.226586000  | -0.121853000 | 2.498725000  |
| Al   | 1.384655000  | -1.738030000 | -0.369774000 |
| C    | 1.047934000  | -3.531503000 | 0.366636000  |
| C    | -0.306180000 | -3.759373000 | 1.065965000  |
| C    | -1.481431000 | -3.512636000 | 0.113922000  |
| Cl   | 3.686446000  | -1.650845000 | -0.675615000 |
| Nd   | 3.627938000  | -1.381655000 | -3.468001000 |
| C    | 3.158022000  | -3.971835000 | -3.933327000 |
| C    | 4.128997000  | -3.613938000 | -4.862800000 |
| Cl   | 2.868793000  | 1.370626000  | -2.981171000 |
| Al   | 4.983519000  | 2.047359000  | -2.374463000 |
| C    | 5.430385000  | 3.629788000  | -3.456823000 |
| C    | 6.663209000  | 4.434021000  | -2.995857000 |
| C    | 7.937715000  | 3.582955000  | -3.028728000 |
| Cl   | 6.028346000  | 0.186643000  | -3.246776000 |
| Cl   | 0.878813000  | -1.689861000 | -2.604629000 |
| C    | 5.208441000  | 1.945028000  | -0.424864000 |
| C    | 4.827430000  | 3.191553000  | 0.398730000  |
| C    | 3.333559000  | 3.510217000  | 0.278534000  |
| C    | 0.234267000  | 1.416138000  | 2.420998000  |
| C    | -0.398217000 | -5.164348000 | 1.673005000  |
| C    | 6.851127000  | 5.708890000  | -3.826235000 |
| C    | 5.221487000  | 3.033923000  | 1.872411000  |
| C    | 5.364707000  | -3.061812000 | -4.536750000 |
| C    | 3.556880000  | -0.380812000 | -6.457833000 |
| C    | 2.166068000  | -0.390126000 | -6.019511000 |
| C    | 1.382361000  | -1.477218000 | -6.040556000 |
| H    | 1.376937000  | 0.770798000  | -0.027906000 |
| H    | -0.245111000 | 0.131983000  | 0.054916000  |
| H    | 1.164604000  | -4.268965000 | -0.439412000 |
| H    | 1.859834000  | -3.743535000 | 1.074661000  |
| H    | 5.567824000  | 3.333286000  | -4.505640000 |
| H    | 4.549374000  | 4.285291000  | -3.451938000 |
| H    | 4.651759000  | 1.078241000  | -0.048510000 |
| H    | 6.266426000  | 1.706008000  | -0.250141000 |
| H    | 2.177217000  | -4.289364000 | -4.257712000 |
| H    | 3.428767000  | -4.257049000 | -2.919102000 |
| C    | 5.992329000  | -3.301930000 | -3.181363000 |
| H    | 3.822655000  | -3.547091000 | -5.904434000 |
| H    | 5.382391000  | 4.051939000  | 0.004294000  |

|   |              |              |              |
|---|--------------|--------------|--------------|
| H | 4.979071000  | 3.929468000  | 2.452526000  |
| H | 4.691685000  | 2.189177000  | 2.322331000  |
| H | 6.293164000  | 2.845397000  | 1.973390000  |
| H | 3.064970000  | 4.390426000  | 0.868467000  |
| H | 3.038024000  | 3.701712000  | -0.756643000 |
| H | 2.734472000  | 2.670713000  | 0.639543000  |
| H | 6.501055000  | 4.743259000  | -1.955875000 |
| H | 8.810198000  | 4.161854000  | -2.715360000 |
| H | 7.864807000  | 2.713888000  | -2.369166000 |
| H | 8.126125000  | 3.212860000  | -4.041443000 |
| H | 7.702678000  | 6.297581000  | -3.472246000 |
| H | 7.030057000  | 5.457328000  | -4.876581000 |
| H | 5.960828000  | 6.341116000  | -3.781643000 |
| H | 0.178669000  | -0.716320000 | 2.365028000  |
| H | -0.392223000 | -3.040730000 | 1.890673000  |
| H | 2.254033000  | 0.013479000  | 3.583079000  |
| H | 2.611454000  | -1.122041000 | 2.281522000  |
| H | 2.918012000  | 0.597953000  | 2.053152000  |
| H | 0.217073000  | 1.481396000  | 3.513147000  |
| H | 0.835963000  | 2.248236000  | 2.044359000  |
| H | -0.787105000 | 1.554108000  | 2.057528000  |
| H | -2.439448000 | -3.698002000 | 0.606538000  |
| H | -1.495675000 | -2.483905000 | -0.257461000 |
| H | -1.415656000 | -4.175338000 | -0.754468000 |
| H | -1.341926000 | -5.311146000 | 2.206989000  |
| H | -0.335373000 | -5.924234000 | 0.887511000  |
| H | 0.419611000  | -5.343039000 | 2.375386000  |
| H | 3.920585000  | -1.274180000 | -6.957133000 |
| C | 4.396997000  | 0.637416000  | -6.230094000 |
| H | 1.777931000  | 0.537758000  | -5.609583000 |
| H | 0.371656000  | -1.448560000 | -5.658258000 |
| H | 1.733019000  | -2.420926000 | -6.441253000 |
| H | 5.434258000  | 0.590351000  | -6.531380000 |
| H | 4.069222000  | 1.538465000  | -5.726673000 |
| H | 6.022399000  | -2.746003000 | -5.337353000 |
| C | 7.501603000  | -3.062685000 | -3.145365000 |
| H | 5.539525000  | -2.690376000 | -2.377625000 |
| H | 7.968821000  | -3.778166000 | -3.829460000 |
| H | 7.726450000  | -2.065792000 | -3.535313000 |
| C | 8.124099000  | -3.211763000 | -1.748495000 |
| C | 9.647805000  | -3.324189000 | -1.850506000 |
| C | 7.738712000  | -2.059612000 | -0.813642000 |
| H | 7.745285000  | -4.145917000 | -1.314264000 |
| H | 8.134929000  | -2.229674000 | 0.190144000  |
| H | 8.148215000  | -1.115717000 | -1.183634000 |
| H | 6.659663000  | -1.929503000 | -0.724209000 |

|   |              |              |              |
|---|--------------|--------------|--------------|
| H | 10.101623000 | -3.438700000 | -0.863211000 |
| H | 9.945060000  | -4.180703000 | -2.460587000 |
| H | 10.069072000 | -2.423685000 | -2.308068000 |
| H | 5.775581000  | -4.326231000 | -2.853509000 |



The following tables show atomic Cartesian coordinates (in Å) for system optimized within framework of ONIOM. First 43 atoms calculated at B3LYP/def2-TZVP level (Q1). As Q2 level used XTb1. All calculations were carried out taking into account the influence of the solvent in the ALPB continuum model and taking into account dispersion corrections in the Grimme D3 semi-empirical model.

# Stage 1

**Table S7: *i*-C<sub>4</sub>H<sub>9</sub>-AS-T**

| Atom | x                 | y                 | z                 |
|------|-------------------|-------------------|-------------------|
| C    | 0.37501435631223  | -0.28203889217552 | -0.90234257341685 |
| C    | 0.03783865244820  | 0.04290683060365  | 0.55842403456994  |
| C    | 1.28139582299441  | 0.45944157221650  | 1.34594251140219  |
| Al   | 1.74143684174820  | -1.67059873717667 | -1.19716391099401 |
| C    | 2.22105209213571  | -3.31203424039476 | -0.21822029476899 |
| C    | 1.05379882832879  | -4.06220973805066 | 0.43971693202384  |
| C    | -0.04565418145422 | -4.39194846110442 | -0.57244341194366 |
| Cl   | 3.77630970782009  | -0.55597512307923 | -1.58640872611962 |
| Nd   | 3.46056735355982  | -0.44570930385763 | -4.33908100624277 |
| C    | 4.94728792995750  | -2.10488253729797 | -5.26835286101801 |
| Cl   | 1.80097090455237  | 1.94494721331560  | -4.29715852004890 |
| Al   | 3.59830673883677  | 3.33406571302224  | -3.74628623202508 |
| C    | 3.63047901016448  | 4.66549985807464  | -5.20135817373600 |
| C    | 4.49548983098987  | 5.91084381636747  | -4.96463125045700 |
| C    | 5.95281068225181  | 5.53673988781605  | -4.68774332667385 |
| Cl   | 5.24551836939067  | 1.69481750071867  | -4.20540189075461 |
| Cl   | 1.48479842063575  | -2.23830253060677 | -3.46977421196650 |
| C    | 3.69219969631522  | 3.52139051693122  | -1.78911815417657 |
| C    | 2.98350734929354  | 4.73814193724048  | -1.18257975247117 |
| C    | 1.48990797906795  | 4.73784346302416  | -1.51208400331982 |
| C    | -1.02201601933360 | 1.14928947233762  | 0.62054043890491  |
| C    | 1.56127668384644  | -5.34679631498169 | 1.10589869379015  |
| C    | 4.40794535536428  | 6.84808214465326  | -6.17566408341819 |
| C    | 3.19218429031979  | 4.76260738401152  | 0.33658536596050  |
| C    | 2.92412385562638  | 0.47286953073922  | -7.31616378738636 |
| C    | 2.12281653166392  | -0.73298618672166 | -7.13345050057190 |
| C    | 0.90128922601677  | -0.74115719885708 | -6.58099548156150 |
| H    | 0.70187954912163  | 0.63609981759744  | -1.40912670101026 |
| H    | -0.54880436080300 | -0.58807162422204 | -1.41364876887785 |
| H    | 2.74136668071923  | -3.98993385091614 | -0.90838415202735 |
| H    | 2.95659911507370  | -3.05796389004988 | 0.55777627226039  |
| H    | 3.95875432982447  | 4.17432033215415  | -6.12826924774671 |
| H    | 2.59659050910588  | 4.98891638443941  | -5.38970125473511 |
| H    | 3.29358845004655  | 2.60625822508002  | -1.33132584736946 |
| H    | 4.75285427961050  | 3.55438222445750  | -1.50183598282506 |
| H    | 5.75941678093128  | -1.63101702518977 | -5.84694537749648 |
| H    | 4.32909583557138  | -2.68052947978887 | -5.98356857741210 |

|   |                   |                   |                   |
|---|-------------------|-------------------|-------------------|
| H | 3.42590388735986  | 5.66077586176414  | -1.59509863571857 |
| H | 2.69794652238960  | 5.63114361279415  | 0.77428801928800  |
| H | 2.78210457608348  | 3.85837420381915  | 0.79028756362950  |
| H | 4.25755643575393  | 4.81329602164708  | 0.56643428443780  |
| H | 1.00328914796173  | 5.61830794053815  | -1.09029248575625 |
| H | 1.34499395749028  | 4.74767449914248  | -2.59929575097347 |
| H | 1.00916435981926  | 3.84564266344393  | -1.10383384634963 |
| H | 4.11086417343028  | 6.45993149287587  | -4.08929622947777 |
| H | 6.55550189370676  | 6.43242016195650  | -4.53098853005912 |
| H | 6.01406846450117  | 4.91596226566498  | -3.78527598345441 |
| H | 6.37380410201719  | 4.97563968738676  | -5.52547585325965 |
| H | 4.99979685912746  | 7.74804707208453  | -6.00209130057821 |
| H | 4.78118327391169  | 6.34815798349477  | -7.07113308510662 |
| H | 3.37061076006038  | 7.13992612187614  | -6.34696241812841 |
| H | -0.38699037591677 | -0.85418486486185 | 1.03999283891631  |
| H | 0.61430996004708  | -3.42789553513740 | 1.22706471091311  |
| H | 1.02665064489511  | 0.65816736943468  | 2.38789610308650  |
| H | 2.03035689388645  | -0.34193896347938 | 1.31881129545628  |
| H | 1.72351335345083  | 1.36288799904446  | 0.91901717912200  |
| H | -1.29015398506887 | 1.36022054240636  | 1.65691909572415  |
| H | -0.64142050788320 | 2.06437332931458  | 0.16291008187949  |
| H | -1.91905790926814 | 0.83871224418543  | 0.08297053324430  |
| H | -0.86287641560590 | -4.92929767921152 | -0.08919428826914 |
| H | -0.44808046298806 | -3.46643995495317 | -1.00346464524220 |
| H | 0.34721267718921  | -5.01113183952290 | -1.38271786776360 |
| H | 0.74171344585790  | -5.86358775431364 | 1.60758571047544  |
| H | 1.99479000927182  | -6.01562713678897 | 0.36015055372322  |
| H | 2.32741325460069  | -5.10636375790816 | 1.84466356867021  |
| H | 2.43224766684578  | 1.42010805552944  | -7.11923451352872 |
| C | 4.22126095471557  | 0.45784100596358  | -7.64755986032376 |
| H | 2.57837632966095  | -1.67248521028278 | -7.43342105569644 |
| H | 0.35804259118169  | -1.66340791419925 | -6.42827653973353 |
| H | 0.41947235647457  | 0.17618042425627  | -6.26381933539199 |
| H | 4.79126553989059  | 1.37340691322620  | -7.72972394126046 |
| H | 4.74556834728636  | -0.47112980540730 | -7.83727899093056 |
| C | 5.55949204676986  | -3.08013432526781 | -4.27512047873203 |
| H | 4.77308654315919  | -3.48786897600514 | -3.61382335337255 |
| C | 6.15638411396678  | -4.27260683312528 | -5.05090826557464 |
| C | 6.63746758283819  | -2.41650446855094 | -3.41378652626409 |
| H | 7.03830289196663  | -3.12826402197010 | -2.69190111571586 |
| H | 7.45447956862831  | -2.05490761586041 | -4.04011111802633 |
| H | 6.21863356845946  | -1.56887708136451 | -2.86436059952913 |
| H | 6.59542031913482  | -4.98211861023345 | -4.34969898229101 |
| H | 5.37721712824445  | -4.77557857693759 | -5.62254258373381 |
| H | 6.92724297364069  | -3.92395496879812 | -5.73773425266426 |

**Stage 1**

**Table S8: *i*-C<sub>4</sub>H<sub>9</sub>-AS-C**

| Atom | x                 | y                 | z                 |
|------|-------------------|-------------------|-------------------|
| C    | 0.16124624319754  | -0.09652000809464 | -0.96539942758533 |
| C    | -0.06826455257461 | -0.00591895153421 | 0.55034090575597  |
| C    | 1.23595298186034  | 0.26709561765993  | 1.30221189372715  |
| Al   | 1.46215463118026  | -1.45392844188073 | -1.55700993179238 |
| C    | 1.90476623975849  | -3.23866442888185 | -0.83952550904433 |
| C    | 0.75463962324146  | -4.02235417801192 | -0.18853563190403 |
| C    | -0.41162460782849 | -4.21303880266210 | -1.16038574786378 |
| Cl   | 3.53361656514849  | -0.42086876389730 | -1.84243605244604 |
| Nd   | 3.44894648824093  | -0.29467510508650 | -4.66069302531316 |
| C    | 4.54057441484216  | -2.54088132379652 | -5.04404879684509 |
| Cl   | 1.79350286554245  | 1.99157527828826  | -4.63715980588283 |
| Al   | 3.46633824106470  | 3.43034196493111  | -3.85466495666704 |
| C    | 3.65214166213130  | 4.79877751347829  | -5.26427159619209 |
| C    | 4.38852668962402  | 6.08540358973759  | -4.85965259177557 |
| C    | 5.79253601253449  | 5.78446964865216  | -4.33087031995290 |
| Cl   | 5.20498508810652  | 1.87214341756269  | -4.14672283024730 |
| Cl   | 1.12016696036871  | -1.68083341517084 | -3.87141394073753 |
| C    | 3.26873139130472  | 3.56641807395246  | -1.89911830584375 |
| C    | 2.48127168645869  | 4.77283930085799  | -1.37007574843508 |
| C    | 1.07972442884416  | 4.84020301873480  | -1.97995939447179 |
| C    | -1.09773609511969 | 1.08430703436163  | 0.86948797189532  |
| C    | 1.25477727810582  | -5.38283668774670 | 0.31192662184343  |
| C    | 4.46706151640237  | 7.04986678926820  | -6.04904385830515 |
| C    | 2.38992759424670  | 4.71791187268141  | 0.15914747549007  |
| C    | 3.12886933890170  | 0.33025416349432  | -7.42095392143340 |
| C    | 2.53283391611526  | -0.93170015720880 | -7.02611745078518 |
| C    | 3.24573913555739  | -2.11292018453578 | -6.91774009082193 |
| H    | 0.48208728523905  | 0.88425438480736  | -1.34080765350738 |
| H    | -0.80299746628409 | -0.29735292697656 | -1.45338062976568 |
| H    | 2.33800696811363  | -3.84585387696931 | -1.64667574201728 |
| H    | 2.70837876446754  | -3.12061159185492 | -0.09847462096547 |
| H    | 4.16264690073804  | 4.34966346518771  | -6.12719402150134 |
| H    | 2.64852936834210  | 5.06846850707131  | -5.62225047073944 |
| H    | 2.79686446729300  | 2.64218840732762  | -1.54095500454994 |
| H    | 4.27082632704320  | 3.57645145597294  | -1.44787001476100 |
| H    | 4.63411795591786  | -3.54210639341349 | -5.46413548391063 |
| H    | 4.03234896609455  | -2.64690331297667 | -4.06812086633163 |
| H    | 3.01510262032842  | 5.70008475865141  | -1.63937661722670 |
| H    | 1.86148541959548  | 5.59252557188136  | 0.54206114501764  |
| H    | 1.85537202209712  | 3.81966465437448  | 0.47435037133934  |
| H    | 3.39067711333417  | 4.69616377360308  | 0.59344134627475  |
| H    | 0.53384098317834  | 5.70278793087916  | -1.59480774797925 |
| H    | 1.14914606088330  | 4.93367179115603  | -3.07096170850413 |

|   |                   |                   |                   |
|---|-------------------|-------------------|-------------------|
| H | 0.51195986737818  | 3.93672282605893  | -1.74397784213569 |
| H | 3.82328725010774  | 6.58982805077356  | -4.05843064478183 |
| H | 6.30214458485793  | 6.70690887650149  | -4.04830020361316 |
| H | 5.73025740216402  | 5.13920525858451  | -3.44564881281803 |
| H | 6.39087741475100  | 5.27541576165252  | -5.09059262711907 |
| H | 4.95787180730527  | 7.97900475951318  | -5.75488372044451 |
| H | 5.03065394938434  | 6.59891883603142  | -6.86794602066127 |
| H | 3.46286512346111  | 7.28381444318672  | -6.40629365091476 |
| H | -0.47516557035812 | -0.96560114929343 | 0.91225553787279  |
| H | 0.38280787583746  | -3.46183955343709 | 0.68517655794625  |
| H | 1.05966466151871  | 0.29308163833720  | 2.37872084498604  |
| H | 1.96644830146467  | -0.52352765450878 | 1.09016540633694  |
| H | 1.66209240813506  | 1.22647772183859  | 0.99902059393917  |
| H | -1.28283883018498 | 1.13111909640815  | 1.94391869143184  |
| H | -0.73571526228303 | 2.05778082444806  | 0.53312409096957  |
| H | -2.03941841830615 | 0.86989565591675  | 0.36163161697255  |
| H | -1.22128922762322 | -4.76890663952739 | -0.68509306642842 |
| H | -0.80081209656146 | -3.23674792896960 | -1.47516132531213 |
| H | -0.08833421152018 | -4.76098200332934 | -2.04893440082305 |
| H | 0.44804783112340  | -5.92908381125952 | 0.80353813144865  |
| H | 1.62713815198091  | -5.98117516199223 | -0.52174595318457 |
| H | 2.06668641377797  | -5.24135408352824 | 1.02722867438968  |
| H | 2.43512955419763  | 1.14993544632822  | -7.57522770019400 |
| C | 4.44827550010812  | 0.60752837303234  | -7.46558668908038 |
| H | 1.46300641509276  | -0.94752594947348 | -6.84973573890696 |
| H | 2.70794282497943  | -3.02741170817897 | -6.71620421235567 |
| H | 4.18369147467641  | -2.23054123119348 | -7.43983879648262 |
| H | 4.80127164169407  | 1.60470441811234  | -7.68514829976004 |
| H | 5.20929775794004  | -0.15535756094851 | -7.35221690120563 |
| C | 5.91435980864318  | -1.90418797035940 | -4.86233836961620 |
| H | 5.81795761854395  | -0.79254964742279 | -4.84158392063364 |
| C | 6.50332970155587  | -2.33495017670844 | -3.50582915951517 |
| C | 6.87089731295787  | -2.28137817841080 | -5.99503928640596 |
| H | 7.83000871767839  | -1.78089728384238 | -5.86004506335119 |
| H | 7.03667904255095  | -3.35923219940873 | -6.00297505884121 |
| H | 6.46100864801811  | -1.98747496360293 | -6.96124341544649 |
| H | 7.48719544997072  | -1.88535343396979 | -3.37257642998108 |
| H | 5.85704599812527  | -2.01232375499100 | -2.68753423443006 |
| H | 6.60058551121792  | -3.41968461124212 | -3.47026048508699 |

**Stage 1**

**Table S9: *i*-C<sub>4</sub>H<sub>9</sub>-AS-trans-cis transition state**

| Atom | x                 | y                 | z                 |
|------|-------------------|-------------------|-------------------|
| C    | 0.57846172432832  | -0.23131908133336 | -0.85336681553315 |
| C    | 0.24507771378836  | 0.03359972313879  | 0.62001999618281  |
| C    | 1.50936667956318  | 0.14846102148860  | 1.47402677738626  |
| Al   | 1.75669798214601  | -1.76139490385472 | -1.22911868129433 |
| C    | 1.97768157092212  | -3.56252988300441 | -0.46417862329582 |
| C    | 0.69373873754055  | -4.26013615723043 | 0.00602782658816  |
| C    | -0.35611238690548 | -4.31563496758922 | -1.10580790188845 |
| Cl   | 3.97081314333215  | -0.89855294795630 | -1.27230134480209 |
| Nd   | 3.94966902416923  | -0.49505083933585 | -3.99255193926280 |
| C    | 5.30114636018992  | -2.30956243215853 | -4.83138250539953 |
| Cl   | 2.06701883469911  | 1.72356472705427  | -4.07400683391172 |
| Al   | 3.70582834565141  | 3.32067105019638  | -3.72224516010509 |
| C    | 3.62496510600720  | 4.50712174088779  | -5.29557894068477 |
| C    | 4.30790734136497  | 5.87483232503156  | -5.16028204654326 |
| C    | 5.79277810462926  | 5.72833467282619  | -4.82244905239774 |
| Cl   | 5.51468685161315  | 1.79093424515616  | -4.10836142241502 |
| Cl   | 1.64970455655283  | -2.01120252308424 | -3.57594516397184 |
| C    | 3.83400666671652  | 3.65623849532054  | -1.78488474251205 |
| C    | 3.03965024606448  | 4.85509702251087  | -1.25089081432929 |
| C    | 1.56826293357670  | 4.78580347187087  | -1.66401509073549 |
| C    | -0.59433507862252 | 1.31061625090266  | 0.74571811893553  |
| C    | 1.01589696029520  | -5.67551140293494 | 0.50079401480255  |
| C    | 4.13573814831921  | 6.67787383654143  | -6.45569446431298 |
| C    | 3.15779543313076  | 4.92489817750169  | 0.27650813504039  |
| C    | 2.59359492737078  | 0.24184501696589  | -7.05537431838355 |
| C    | 1.21690100237064  | -0.30965161419556 | -7.04006947879152 |
| C    | 0.43248258816191  | -0.37315221825097 | -8.10896038338979 |
| H    | 1.04745861967294  | 0.66403845197002  | -1.28296645717378 |
| H    | -0.36151335555810 | -0.36286712967409 | -1.40771559280976 |
| H    | 2.47544689120634  | -4.19202069790826 | -1.21440402379385 |
| H    | 2.67532802488567  | -3.50281563578756 | 0.38269749708943  |
| H    | 4.05567034708870  | 3.97919049497869  | -6.15794379421289 |
| H    | 2.56662308511395  | 4.66763180354412  | -5.54637630751180 |
| H    | 3.50492298485497  | 2.74869171236810  | -1.25999221910130 |
| H    | 4.89070728747091  | 3.78774084761466  | -1.51342754600589 |
| H    | 5.93182494987949  | -1.93699796504911 | -5.65974113270848 |
| H    | 4.63377221799109  | -3.08308262874572 | -5.25022491293561 |
| H    | 3.46658407141600  | 5.78498522725530  | -1.66215835637184 |
| H    | 2.62998581952013  | 5.80026310120298  | 0.65804560182594  |
| H    | 2.72906368285007  | 4.03007919509647  | 0.73153272913272  |
| H    | 4.20703723535924  | 4.99452348445044  | 0.56730982257304  |
| H    | 1.01704733970925  | 5.64065551934944  | -1.26980668677541 |
| H    | 1.48498262640106  | 4.79491987862362  | -2.75821926007835 |

|   |                   |                   |                   |
|---|-------------------|-------------------|-------------------|
| H | 1.10482856578953  | 3.87015688187895  | -1.28840673580852 |
| H | 3.82573838906454  | 6.44449917128650  | -4.34872304318351 |
| H | 6.26287644673700  | 6.70827975630451  | -4.72845269453463 |
| H | 5.91000530499304  | 5.19551465485266  | -3.87078234512621 |
| H | 6.31233473590054  | 5.16610566931195  | -5.60208973045748 |
| H | 4.59660682897028  | 7.66180677726422  | -6.35610086588132 |
| H | 4.60143135979907  | 6.15422325405949  | -7.29244080403840 |
| H | 3.07495931342673  | 6.80974446273976  | -6.67487015436040 |
| H | -0.35763781255687 | -0.80339837628705 | 1.01078249601480  |
| H | 0.26581542788242  | -3.69907399084850 | 0.85297056614109  |
| H | 1.25241494856841  | 0.34470929179589  | 2.51591932801591  |
| H | 2.07902372526002  | -0.78818641213912 | 1.42857811810212  |
| H | 2.14561254623802  | 0.96078596760461  | 1.11386898827056  |
| H | -0.87172568954382 | 1.48191431843224  | 1.78694462092911  |
| H | -0.02795844764268 | 2.17238192158674  | 0.38718295506215  |
| H | -1.50454012216303 | 1.22069573081553  | 0.15094690515278  |
| H | -1.26100103033438 | -4.81347317473222 | -0.75440526914626 |
| H | -0.62130780424343 | -3.29854311032968 | -1.42161812285399 |
| H | 0.02669700348241  | -4.86047423371330 | -1.97234580626639 |
| H | 0.11242020177558  | -6.16400573596079 | 0.86889011745434  |
| H | 1.43464136533643  | -6.27509410107211 | -0.30951092801938 |
| H | 1.74419081248875  | -5.63029549107905 | 1.31204483721128  |
| H | 2.67934215562363  | 1.32315559945189  | -6.98679116767309 |
| C | 3.70701253238467  | -0.48942757089354 | -7.13404519419034 |
| H | 0.84083924128224  | -0.64375963905126 | -6.07648813498194 |
| H | -0.57227547979576 | -0.77142584542731 | -8.04229860496697 |
| H | 0.76484447371715  | -0.03497150482144 | -9.08407909531223 |
| H | 4.68359937426053  | -0.01835345066714 | -7.17449210041665 |
| H | 3.67882607632805  | -1.56950508669571 | -7.21872169502609 |
| C | 6.20720019724226  | -2.95667492100890 | -3.79495770313572 |
| H | 5.60106489937535  | -3.34766936794414 | -2.95944346220048 |
| C | 6.92199784989624  | -4.15915182861585 | -4.44466835194567 |
| C | 7.24091623208593  | -1.96901386434411 | -3.24259622849159 |
| H | 7.86096894049510  | -2.45092766601146 | -2.48669275644031 |
| H | 7.88643154403914  | -1.60535831571620 | -4.04400656369426 |
| H | 6.74255784278069  | -1.11106847773557 | -2.77811269443366 |
| H | 7.56253054662258  | -4.64443497007090 | -3.70836514472742 |
| H | 6.18942339557250  | -4.87939925793405 | -4.80709463560555 |
| H | 7.53157561802314  | -3.82499435403989 | -5.28404252455281 |

Stage 1

**Table S10: *i*-C<sub>4</sub>H<sub>9</sub>-AS-T-TS inclusion *trans*-C<sub>4</sub>H<sub>8</sub> in polymer. Transition state**

| Atom | x                 | y                 | z                 |
|------|-------------------|-------------------|-------------------|
| C    | 0.47197978593493  | -0.21941458476720 | -0.72496275113123 |
| C    | 0.33057223479866  | -0.01177802902624 | 0.78993709313592  |
| C    | 1.67927794274252  | 0.29669143834299  | 1.44353806291015  |
| Al   | 1.79685835681811  | -1.55708977347830 | -1.30722707192960 |
| C    | 2.34693989838341  | -3.30126993461882 | -0.56350825840544 |
| C    | 1.25894722628494  | -4.11270149413936 | 0.15670632718410  |
| C    | 0.05284882234285  | -4.36023286781597 | -0.75192519794533 |
| Cl   | 3.79779532493668  | -0.42503807761994 | -1.72709893227755 |
| Nd   | 3.48892639485736  | -0.34909234331994 | -4.53572540615823 |
| C    | 5.63305222215985  | -1.67495138006922 | -4.96790050308970 |
| Cl   | 1.85861466268109  | 1.94575656391586  | -4.39813957640838 |
| Al   | 3.58982190024857  | 3.45080437245110  | -3.96854461762139 |
| C    | 3.53827225836988  | 4.67497211409525  | -5.51438065051160 |
| C    | 4.37850942123309  | 5.95757668695143  | -5.41939671667139 |
| C    | 5.84677860385918  | 5.64550139413980  | -5.12260751071384 |
| Cl   | 5.25492885701541  | 1.84532794169141  | -4.36583911472448 |
| Cl   | 1.32024389608980  | -1.89486270711181 | -3.58081087297949 |
| C    | 3.65879097323675  | 3.75888648984563  | -2.02377667791749 |
| C    | 2.82405449064233  | 4.92794353360335  | -1.48123080281950 |
| C    | 1.35796883497247  | 4.81879330532758  | -1.90539503296296 |
| C    | -0.66583823189532 | 1.11657378312477  | 1.08049976052801  |
| C    | 1.83103092712089  | -5.44790322592999 | 0.64820161319896  |
| C    | 4.26172765158651  | 6.76398502801688  | -6.71865299776861 |
| C    | 2.92627000412579  | 4.98596214433589  | 0.04747340340738  |
| C    | 3.76170261814981  | -0.24920705910187 | -7.07121103831716 |
| C    | 2.51989484365694  | -0.98742776001237 | -7.16196808132454 |
| C    | 1.28424034393874  | -0.48020300340851 | -7.00343804564031 |
| H    | 0.73387664738435  | 0.73768848621218  | -1.19650344293883 |
| H    | -0.51061881145044 | -0.49111161823492 | -1.13552136141385 |
| H    | 2.75580176033772  | -3.90868259144123 | -1.38237629774222 |
| H    | 3.18301531214113  | -3.14065693153355 | 0.13148383920268  |
| H    | 3.84556202685639  | 4.11246849290675  | -6.40741463154243 |
| H    | 2.49074485208688  | 4.95720479515588  | -5.69298073656459 |
| H    | 3.34336261569819  | 2.83122249478290  | -1.52705452798611 |
| H    | 4.70634232903690  | 3.90922191383535  | -1.72656729163355 |
| H    | 5.90485147629749  | -1.01509580994863 | -4.12473299717600 |
| H    | 6.56313536497742  | -1.93866477629220 | -5.47109538645916 |
| H    | 3.22497569670815  | 5.87499988989883  | -1.88029825950202 |
| H    | 2.36740253240650  | 5.83916304431218  | 0.43540645084946  |
| H    | 2.52261530211886  | 4.07260953771713  | 0.48888417236912  |
| H    | 3.97015768062074  | 5.08544109730552  | 0.34918457821981  |
| H    | 0.77832282065305  | 5.65084002500517  | -1.50267040560545 |
| H    | 1.28034212975401  | 4.84124089819473  | -2.99943599144129 |

|   |                   |                   |                   |
|---|-------------------|-------------------|-------------------|
| H | 0.92045969889783  | 3.88422434937393  | -1.54496817119158 |
| H | 3.99059875091223  | 6.58519314244112  | -4.60018108727927 |
| H | 6.43073971729836  | 6.56529607468257  | -5.06395128670755 |
| H | 5.93158868121447  | 5.12023866347359  | -4.16319278101607 |
| H | 6.27325493930645  | 5.01225638918107  | -5.90469811010736 |
| H | 4.82968594523187  | 7.69280833960715  | -6.64441286389907 |
| H | 4.64460173711521  | 6.18480906277587  | -7.56109912729125 |
| H | 3.21620753833833  | 7.00897685870812  | -6.91300537546378 |
| H | -0.06591248694001 | -0.93486383289328 | 1.24544657018573  |
| H | 0.91200696061100  | -3.55173349385075 | 1.04025041283900  |
| H | 1.56111953457872  | 0.44537839694750  | 2.51796096678449  |
| H | 2.37361549411504  | -0.53802696772530 | 1.28453015776289  |
| H | 2.11837076581338  | 1.20078997147876  | 1.01412760811889  |
| H | -0.80359519409558 | 1.23667609679792  | 2.15633804815565  |
| H | -0.30238158283663 | 2.05899594832005  | 0.66611649937922  |
| H | -1.63201273638786 | 0.88785535780472  | 0.62788527243719  |
| H | -0.71094348032187 | -4.93697318578568 | -0.22798639308051 |
| H | -0.38758255805555 | -3.40421462025509 | -1.06129168396338 |
| H | 0.35064233000956  | -4.91127609125983 | -1.64758355313367 |
| H | 1.06980177385980  | -6.01478013052742 | 1.18674835670778  |
| H | 2.18123218903054  | -6.04483956931957 | -0.19612788750832 |
| H | 2.67277927270497  | -5.26894281675407 | 1.31917106398297  |
| H | 3.72373699031592  | 0.83765398616413  | -7.11046199301466 |
| C | 4.99139621391836  | -0.88704747324011 | -6.93736526392895 |
| H | 2.61690171969822  | -2.06591045198499 | -7.28206710600706 |
| H | 0.41150552225428  | -1.11750319430040 | -7.02550092397192 |
| H | 1.11689860434777  | 0.58296926231469  | -6.88161187016035 |
| H | 5.89273111798427  | -0.29620429016581 | -7.01321627986919 |
| H | 5.08822007600643  | -1.90851355924813 | -7.27581533747742 |
| C | 4.94379541424864  | -2.93047513146352 | -4.44416945955430 |
| H | 3.92027730981688  | -2.67256738815510 | -4.08946164524636 |
| C | 4.82029293504148  | -4.02884389507037 | -5.50228171784085 |
| C | 5.73405388969836  | -3.45234644305293 | -3.23058719171861 |
| H | 5.24719310739513  | -4.34203855335635 | -2.82995559342052 |
| H | 6.75050632795312  | -3.70836247308296 | -3.52808442479403 |
| H | 5.77653007341091  | -2.69162560537009 | -2.45016823770862 |
| H | 4.38606983518684  | -4.92553269214082 | -5.05900595541500 |
| H | 4.17466569765053  | -3.70730732757577 | -6.32031841657560 |
| H | 5.80121336075217  | -4.27999831679143 | -5.90717871968782 |



**Stage 1**

**Table S11: *i*-C<sub>4</sub>H<sub>9</sub>-AS-C-TS inclusion *cis*-C<sub>4</sub>H<sub>8</sub> in polymer. Transition state**

| Atom | x                 | y                 | z                 |
|------|-------------------|-------------------|-------------------|
| C    | 0.16124624319754  | -0.09652000809464 | -0.96539942758533 |
| C    | -0.06826455257461 | -0.00591895153421 | 0.55034090575597  |
| C    | 1.23595298186034  | 0.26709561765993  | 1.30221189372715  |
| Al   | 1.46215463118026  | -1.45392844188073 | -1.55700993179238 |
| C    | 1.90476623975849  | -3.23866442888185 | -0.83952550904433 |
| C    | 0.75463962324146  | -4.02235417801192 | -0.18853563190403 |
| C    | -0.41162460782849 | -4.21303880266210 | -1.16038574786378 |
| Cl   | 3.53361656514849  | -0.42086876389730 | -1.84243605244604 |
| Nd   | 3.44894648824093  | -0.29467510508650 | -4.66069302531316 |
| C    | 4.54057441484216  | -2.54088132379652 | -5.04404879684509 |
| Cl   | 1.79350286554245  | 1.99157527828826  | -4.63715980588283 |
| Al   | 3.46633824106470  | 3.43034196493111  | -3.85466495666704 |
| C    | 3.65214166213130  | 4.79877751347829  | -5.26427159619209 |
| C    | 4.38852668962402  | 6.08540358973759  | -4.85965259177557 |
| C    | 5.79253601253449  | 5.78446964865216  | -4.33087031995290 |
| Cl   | 5.20498508810652  | 1.87214341756269  | -4.14672283024730 |
| Cl   | 1.12016696036871  | -1.68083341517084 | -3.87141394073753 |
| C    | 3.26873139130472  | 3.56641807395246  | -1.89911830584375 |
| C    | 2.48127168645869  | 4.77283930085799  | -1.37007574843508 |
| C    | 1.07972442884416  | 4.84020301873480  | -1.97995939447179 |
| C    | -1.09773609511969 | 1.08430703436163  | 0.86948797189532  |
| C    | 1.25477727810582  | -5.38283668774670 | 0.31192662184343  |
| C    | 4.46706151640237  | 7.04986678926820  | -6.04904385830515 |
| C    | 2.38992759424670  | 4.71791187268141  | 0.15914747549007  |
| C    | 3.12886933890170  | 0.33025416349432  | -7.42095392143340 |
| C    | 2.53283391611526  | -0.93170015720880 | -7.02611745078518 |
| C    | 3.24573913555739  | -2.11292018453578 | -6.91774009082193 |
| H    | 0.48208728523905  | 0.88425438480736  | -1.34080765350738 |
| H    | -0.80299746628409 | -0.29735292697656 | -1.45338062976568 |
| H    | 2.33800696811363  | -3.84585387696931 | -1.64667574201728 |
| H    | 2.70837876446754  | -3.12061159185492 | -0.09847462096547 |
| H    | 4.16264690073804  | 4.34966346518771  | -6.12719402150134 |
| H    | 2.64852936834210  | 5.06846850707131  | -5.62225047073944 |
| H    | 2.79686446729300  | 2.64218840732762  | -1.54095500454994 |
| H    | 4.27082632704320  | 3.57645145597294  | -1.44787001476100 |
| H    | 4.63411795591786  | -3.54210639341349 | -5.46413548391063 |
| H    | 4.03234896609455  | -2.64690331297667 | -4.06812086633163 |
| H    | 3.01510262032842  | 5.70008475865141  | -1.63937661722670 |
| H    | 1.86148541959548  | 5.59252557188136  | 0.54206114501764  |
| H    | 1.85537202209712  | 3.81966465437448  | 0.47435037133934  |
| H    | 3.39067711333417  | 4.69616377360308  | 0.59344134627475  |
| H    | 0.53384098317834  | 5.70278793087916  | -1.59480774797925 |
| H    | 1.14914606088330  | 4.93367179115603  | -3.07096170850413 |

|   |                   |                   |                   |
|---|-------------------|-------------------|-------------------|
| H | 0.51195986737818  | 3.93672282605893  | -1.74397784213569 |
| H | 3.82328725010774  | 6.58982805077356  | -4.05843064478183 |
| H | 6.30214458485793  | 6.70690887650149  | -4.04830020361316 |
| H | 5.73025740216402  | 5.13920525858451  | -3.44564881281803 |
| H | 6.39087741475100  | 5.27541576165252  | -5.09059262711907 |
| H | 4.95787180730527  | 7.97900475951318  | -5.75488372044451 |
| H | 5.03065394938434  | 6.59891883603142  | -6.86794602066127 |
| H | 3.46286512346111  | 7.28381444318672  | -6.40629365091476 |
| H | -0.47516557035812 | -0.96560114929343 | 0.91225553787279  |
| H | 0.38280787583746  | -3.46183955343709 | 0.68517655794625  |
| H | 1.05966466151871  | 0.29308163833720  | 2.37872084498604  |
| H | 1.96644830146467  | -0.52352765450878 | 1.09016540633694  |
| H | 1.66209240813506  | 1.22647772183859  | 0.99902059393917  |
| H | -1.28283883018498 | 1.13111909640815  | 1.94391869143184  |
| H | -0.73571526228303 | 2.05778082444806  | 0.53312409096957  |
| H | -2.03941841830615 | 0.86989565591675  | 0.36163161697255  |
| H | -1.22128922762322 | -4.76890663952739 | -0.68509306642842 |
| H | -0.80081209656146 | -3.23674792896960 | -1.47516132531213 |
| H | -0.08833421152018 | -4.76098200332934 | -2.04893440082305 |
| H | 0.44804783112340  | -5.92908381125952 | 0.80353813144865  |
| H | 1.62713815198091  | -5.98117516199223 | -0.52174595318457 |
| H | 2.06668641377797  | -5.24135408352824 | 1.02722867438968  |
| H | 2.43512955419763  | 1.14993544632822  | -7.57522770019400 |
| C | 4.44827550010812  | 0.60752837303234  | -7.46558668908038 |
| H | 1.46300641509276  | -0.94752594947348 | -6.84973573890696 |
| H | 2.70794282497943  | -3.02741170817897 | -6.71620421235567 |
| H | 4.18369147467641  | -2.23054123119348 | -7.43983879648262 |
| H | 4.80127164169407  | 1.60470441811234  | -7.68514829976004 |
| H | 5.20929775794004  | -0.15535756094851 | -7.35221690120563 |
| C | 5.91435980864318  | -1.90418797035940 | -4.86233836961620 |
| H | 5.81795761854395  | -0.79254964742279 | -4.84158392063364 |
| C | 6.50332970155587  | -2.33495017670844 | -3.50582915951517 |
| C | 6.87089731295787  | -2.28137817841080 | -5.99503928640596 |
| H | 7.83000871767839  | -1.78089728384238 | -5.86004506335119 |
| H | 7.03667904255095  | -3.35923219940873 | -6.00297505884121 |
| H | 6.46100864801811  | -1.98747496360293 | -6.96124341544649 |
| H | 7.48719544997072  | -1.88535343396979 | -3.37257642998108 |
| H | 5.85704599812527  | -2.01232375499100 | -2.68753423443006 |
| H | 6.60058551121792  | -3.41968461124212 | -3.47026048508699 |

**Stage 1****Table S12: *i*-C<sub>4</sub>H<sub>9</sub>-T-AS addition *trans*-C<sub>4</sub>H<sub>8</sub> chain in polymer.**

| Atom | x            | y            | z            |
|------|--------------|--------------|--------------|
| C    | 1.232497000  | -0.970554000 | -0.017702000 |
| Al   | 2.326891000  | -2.550944000 | 0.434222000  |
| C    | 2.126702000  | -3.878315000 | 1.872923000  |
| Cl   | 4.568665000  | -1.865796000 | 0.417677000  |
| Nd   | 4.525560000  | -1.816486000 | -2.404590000 |
| C    | 6.441792000  | -3.102074000 | -3.380419000 |
| C    | 5.704002000  | -2.909289000 | -4.584657000 |
| Cl   | 2.457971000  | -0.296388000 | -3.593699000 |
| Al   | 3.592007000  | 1.723740000  | -3.410953000 |
| C    | 4.259524000  | 2.110849000  | -5.226237000 |
| Cl   | 5.392129000  | 0.814017000  | -2.173733000 |
| Cl   | 2.554165000  | -3.643871000 | -1.649887000 |
| C    | 2.663608000  | 2.880626000  | -2.112599000 |
| C    | 5.342270000  | -1.693710000 | -5.095660000 |
| H    | 1.814967000  | -0.282394000 | -0.644772000 |
| H    | 0.400279000  | -1.304492000 | -0.652840000 |
| H    | 2.600973000  | -4.819363000 | 1.565599000  |
| H    | 2.695245000  | -3.527329000 | 2.745371000  |
| H    | 5.060507000  | 1.397953000  | -5.458652000 |
| H    | 3.453907000  | 1.892583000  | -5.940570000 |
| H    | 2.132371000  | 2.242605000  | -1.395003000 |
| H    | 3.419930000  | 3.422329000  | -1.528088000 |
| H    | 6.686443000  | -4.116264000 | -3.084515000 |
| H    | 7.234002000  | -2.380018000 | -3.160073000 |
| C    | 4.497371000  | -1.479614000 | -6.319055000 |
| H    | 5.206660000  | -3.784953000 | -5.004042000 |
| H    | 5.892175000  | -0.810409000 | -4.756293000 |
| C    | 5.340753000  | -1.056395000 | -7.538731000 |
| H    | 3.939470000  | -2.394738000 | -6.537546000 |
| H    | 5.984969000  | -0.216596000 | -7.249565000 |
| H    | 6.006149000  | -1.876395000 | -7.836203000 |
| H    | 3.754826000  | -0.703858000 | -6.116194000 |
| C    | 0.661136000  | -0.189934000 | 1.172617000  |
| C    | 1.775460000  | 0.373930000  | 2.055408000  |
| C    | 0.678622000  | -4.154076000 | 2.305915000  |
| C    | -0.173577000 | -4.643082000 | 1.133247000  |
| C    | 4.765749000  | 3.537538000  | -5.478857000 |
| C    | 5.878630000  | 3.920913000  | -4.501596000 |
| C    | 1.681172000  | 3.896769000  | -2.710800000 |
| C    | 0.615746000  | 3.209597000  | -3.567255000 |
| C    | -0.249790000 | 0.939060000  | 0.677635000  |
| C    | 0.651092000  | -5.179820000 | 3.445126000  |
| C    | 5.261426000  | 3.674383000  | -6.923619000 |

|   |              |              |               |
|---|--------------|--------------|---------------|
| C | 1.018191000  | 4.715605000  | -1.596987000  |
| H | 2.235854000  | 4.599757000  | -3.355135000  |
| H | 0.358283000  | 5.473305000  | -2.022807000  |
| H | 0.430909000  | 4.065486000  | -0.946014000  |
| H | 1.779524000  | 5.214345000  | -0.995091000  |
| H | -0.070589000 | 3.944912000  | -3.990070000  |
| H | 1.092183000  | 2.666766000  | -4.393545000  |
| H | 0.038900000  | 2.498542000  | -2.970780000  |
| H | 3.931528000  | 4.246036000  | -5.343514000  |
| H | 6.230775000  | 4.934310000  | -4.700026000  |
| H | 5.504246000  | 3.881092000  | -3.471413000  |
| H | 6.724645000  | 3.234947000  | -4.590978000  |
| H | 5.579506000  | 4.699091000  | -7.122208000  |
| H | 6.105156000  | 3.004699000  | -7.100325000  |
| H | 4.461917000  | 3.416028000  | -7.619996000  |
| H | 0.045099000  | -0.866644000 | 1.790264000   |
| H | 0.230680000  | -3.221434000 | 2.687871000   |
| H | 1.356353000  | 0.931663000  | 2.894179000   |
| H | 2.387456000  | -0.443880000 | 2.455168000   |
| H | 2.421265000  | 1.043220000  | 1.480830000   |
| H | -0.660089000 | 1.497192000  | 1.520583000   |
| H | 0.312506000  | 1.626098000  | 0.041956000   |
| H | -1.075554000 | 0.527247000  | 0.095305000   |
| H | -1.197931000 | -4.833437000 | 1.457136000   |
| H | -0.197650000 | -3.881980000 | 0.343271000   |
| H | 0.236289000  | -5.565628000 | 0.714805000   |
| H | -0.374281000 | -5.351981000 | 3.776252000   |
| H | 1.077603000  | -6.128370000 | 3.113955000   |
| H | 1.233812000  | -4.813160000 | 4.291758000   |
| C | 4.495125000  | -0.613631000 | -8.746314000  |
| C | 5.410581000  | -0.012769000 | -9.817706000  |
| C | 3.680536000  | -1.771457000 | -9.330105000  |
| H | 3.797583000  | 0.168862000  | -8.410431000  |
| H | 3.129371000  | -1.433820000 | -10.208507000 |
| H | 4.335751000  | -2.592445000 | -9.626380000  |
| H | 2.961974000  | -2.145327000 | -8.600308000  |
| H | 4.817998000  | 0.339735000  | -10.662501000 |
| H | 5.969105000  | 0.831275000  | -9.411174000  |
| H | 6.121276000  | -0.758348000 | -10.178115000 |

**Stage 1****Table S13: *i*-C<sub>4</sub>H<sub>9</sub>-T-AS addition *cis*-C<sub>4</sub>H<sub>8</sub> chain in polymer.**

| Atom | x           | y            | z            |
|------|-------------|--------------|--------------|
| C    | 1.241593000 | -1.769451000 | 1.402758000  |
| Al   | 2.597725000 | -2.018016000 | -0.004838000 |
| C    | 3.670735000 | -3.583685000 | -0.547331000 |
| Cl   | 4.172280000 | -0.284524000 | 0.078176000  |
| Nd   | 3.791976000 | 0.383851000  | -2.633862000 |
| C    | 5.875265000 | -1.117024000 | -3.263527000 |
| C    | 5.791837000 | -0.188627000 | -4.306258000 |
| C    | 4.673837000 | 0.023059000  | -5.101419000 |
| Cl   | 1.888720000 | 2.027703000  | -3.917965000 |
| Al   | 3.175620000 | 3.953406000  | -3.721867000 |
| C    | 4.115728000 | 4.121099000  | -5.448555000 |
| Cl   | 4.706986000 | 2.978447000  | -2.200156000 |
| Cl   | 1.584005000 | -1.200069000 | -1.959540000 |
| C    | 2.142165000 | 5.255153000  | -2.660724000 |
| H    | 1.190352000 | -0.702679000 | 1.658337000  |
| H    | 0.261170000 | -2.020161000 | 0.974327000  |
| H    | 3.959020000 | -3.438675000 | -1.598034000 |
| H    | 4.612107000 | -3.577478000 | 0.019116000  |
| H    | 4.943687000 | 3.399467000  | -5.465954000 |
| H    | 3.425177000 | 3.801739000  | -6.241810000 |
| H    | 1.486058000 | 4.694020000  | -1.981619000 |
| H    | 2.826995000 | 5.821623000  | -2.015134000 |
| H    | 5.341006000 | -2.062492000 | -3.315763000 |
| H    | 6.746221000 | -1.125052000 | -2.621579000 |
| H    | 6.551040000 | 0.591692000  | -4.331159000 |
| C    | 3.613312000 | -1.030561000 | -5.320085000 |
| H    | 4.692756000 | 0.841009000  | -5.810857000 |
| C    | 4.078198000 | -2.155187000 | -6.275998000 |
| H    | 3.303305000 | -1.522385000 | -4.379026000 |
| H    | 2.710178000 | -0.556156000 | -5.708835000 |
| H    | 4.278263000 | -1.706626000 | -7.255609000 |
| H    | 5.030252000 | -2.558290000 | -5.914723000 |
| C    | 1.444313000 | -2.588911000 | 2.684822000  |
| C    | 2.798077000 | -2.287835000 | 3.330689000  |
| C    | 3.015513000 | -4.964579000 | -0.398262000 |
| C    | 1.656631000 | -5.024809000 | -1.098506000 |
| C    | 4.657448000 | 5.513770000  | -5.800374000 |
| C    | 5.629117000 | 6.021294000  | -4.733241000 |
| C    | 1.295620000 | 6.248006000  | -3.472122000 |
| C    | 0.360644000 | 5.529425000  | -4.447630000 |
| C    | 0.308064000 | -2.308640000 | 3.675478000  |
| C    | 3.943447000 | -6.051856000 | -0.954016000 |
| C    | 5.344944000 | 5.483513000  | -7.170834000 |

|   |              |              |              |
|---|--------------|--------------|--------------|
| C | 0.483447000  | 7.143719000  | -2.529033000 |
| H | 1.964318000  | 6.899676000  | -4.058535000 |
| H | -0.091180000 | 7.874467000  | -3.100463000 |
| H | -0.206231000 | 6.542094000  | -1.934211000 |
| H | 1.152418000  | 7.677347000  | -1.852123000 |
| H | -0.231453000 | 6.251066000  | -5.012571000 |
| H | 0.945453000  | 4.931716000  | -5.158455000 |
| H | -0.321006000 | 4.864210000  | -3.911794000 |
| H | 3.816801000  | 6.224620000  | -5.864482000 |
| H | 6.004108000  | 7.011548000  | -4.995909000 |
| H | 5.120435000  | 6.090053000  | -3.763774000 |
| H | 6.479646000  | 5.342741000  | -4.631933000 |
| H | 5.710178000  | 6.476754000  | -7.436437000 |
| H | 6.188735000  | 4.791011000  | -7.156905000 |
| H | 4.639232000  | 5.154988000  | -7.935498000 |
| H | 1.414125000  | -3.663444000 | 2.438659000  |
| H | 2.857706000  | -5.175266000 | 0.672484000  |
| H | 2.929856000  | -2.878320000 | 4.238560000  |
| H | 3.608918000  | -2.537845000 | 2.634556000  |
| H | 2.875968000  | -1.228973000 | 3.589143000  |
| H | 0.432511000  | -2.910341000 | 4.577144000  |
| H | 0.298646000  | -1.253597000 | 3.955025000  |
| H | -0.652379000 | -2.556202000 | 3.220439000  |
| H | 1.220174000  | -6.020275000 | -1.004689000 |
| H | 0.966874000  | -4.300873000 | -0.647647000 |
| H | 1.759039000  | -4.789086000 | -2.160281000 |
| H | 3.500881000  | -7.039397000 | -0.814371000 |
| H | 4.118196000  | -5.893658000 | -2.019923000 |
| H | 4.904070000  | -6.023137000 | -0.437390000 |
| C | 3.080440000  | -3.315791000 | -6.450999000 |
| H | 3.496503000  | -3.950252000 | -7.247653000 |
| C | 2.969524000  | -4.171999000 | -5.186301000 |
| C | 1.700188000  | -2.832962000 | -6.905559000 |
| H | 2.328289000  | -5.033260000 | -5.376005000 |
| H | 3.953695000  | -4.533388000 | -4.884763000 |
| H | 2.540612000  | -3.603314000 | -4.359364000 |
| H | 1.078325000  | -3.688562000 | -7.170890000 |
| H | 1.197271000  | -2.277795000 | -6.112649000 |
| H | 1.792575000  | -2.188389000 | -7.780587000 |

**Stage 2****Table S14: *i*-C<sub>4</sub>H<sub>9</sub>-C-AS-T**

| Atom | x         | y         | z         |
|------|-----------|-----------|-----------|
| C    | -3.208857 | -2.031650 | 1.860762  |
| Al   | -3.440083 | -0.807130 | 0.335365  |
| Cl   | -2.152605 | 1.056863  | 0.880654  |
| Nd   | -0.171550 | 0.638351  | -1.077504 |
| C    | 0.125560  | 3.161601  | -1.169232 |
| C    | 0.905274  | 2.914636  | -0.001273 |
| C    | -4.129868 | -3.257358 | 1.914328  |
| C    | -3.745679 | -4.148136 | 3.102238  |
| C    | -4.076199 | -4.059883 | 0.612896  |
| C    | -5.063159 | -0.151323 | -0.585843 |
| C    | -6.297211 | 0.126547  | 0.283384  |
| C    | -7.430187 | 0.695086  | -0.580527 |
| Cl   | -2.054048 | -1.506477 | -1.405174 |
| C    | -5.976076 | 1.091175  | 1.427131  |
| Cl   | 0.950968  | -1.186471 | 0.789890  |
| Al   | 2.485438  | -2.079278 | -0.692375 |
| C    | 1.839232  | -3.850595 | -1.271241 |
| C    | 2.261564  | -5.055405 | -0.418900 |
| C    | 1.600157  | -6.333114 | -0.949653 |
| Cl   | 1.874857  | -0.689324 | -2.498798 |
| C    | 4.249260  | -1.455901 | -0.060948 |
| C    | 5.491524  | -2.116356 | -0.675467 |
| C    | 6.762600  | -1.476846 | -0.102292 |
| C    | 5.490642  | -2.004312 | -2.201396 |
| C    | 1.908387  | -4.853090 | 1.056127  |
| C    | 2.025733  | 2.134708  | 0.040056  |
| H    | -2.162207 | -2.365066 | 1.853587  |
| H    | -3.331810 | -1.457345 | 2.789662  |
| H    | -4.789369 | 0.772507  | -1.113086 |
| H    | -5.339813 | -0.873614 | -1.366778 |
| H    | 4.303839  | -0.373691 | -0.236650 |
| H    | 4.287306  | -1.579612 | 1.030538  |
| H    | 0.742126  | -3.799502 | -1.305573 |
| H    | 2.163205  | -4.021424 | -2.307374 |
| H    | 3.353881  | -5.187245 | -0.493759 |
| H    | 1.929414  | -7.200002 | -0.374551 |
| H    | 0.513631  | -6.255792 | -0.877713 |
| H    | 1.869336  | -6.485214 | -1.996077 |
| H    | 2.203577  | -5.722775 | 1.645135  |
| H    | 2.434515  | -3.974593 | 1.450262  |
| H    | 0.833009  | -4.698821 | 1.178163  |
| H    | 5.504469  | -3.186198 | -0.409437 |
| H    | 6.383560  | -2.470405 | -2.620700 |

|   |           |           |           |
|---|-----------|-----------|-----------|
| H | 4.610002  | -2.509930 | -2.615498 |
| H | 5.467560  | -0.956519 | -2.511334 |
| H | 7.651645  | -1.963029 | -0.506967 |
| H | 6.798377  | -0.414902 | -0.353494 |
| H | 6.773710  | -1.575740 | 0.984395  |
| H | -5.169610 | -2.924048 | 2.068290  |
| H | -6.653315 | -0.819830 | 0.722869  |
| H | -4.713368 | -4.942966 | 0.679283  |
| H | -4.428574 | -3.442046 | -0.222398 |
| H | -3.054010 | -4.382664 | 0.398883  |
| H | -4.422255 | -5.001216 | 3.172562  |
| H | -2.724840 | -4.516572 | 2.985288  |
| H | -3.804900 | -3.577685 | 4.030552  |
| H | -6.866107 | 1.283488  | 2.028135  |
| H | -5.206321 | 0.659604  | 2.078591  |
| H | -5.607759 | 2.043602  | 1.037622  |
| H | -8.323239 | 0.861472  | 0.024014  |
| H | -7.126988 | 1.643846  | -1.027218 |
| H | -7.675875 | -0.003245 | -1.382075 |
| H | 0.677344  | 3.272327  | -2.103775 |
| H | -0.713515 | 3.839930  | -1.073706 |
| H | 0.469054  | 3.196718  | 0.956546  |
| H | 2.524425  | 1.894390  | -0.903133 |
| C | -0.338699 | 1.530501  | -4.263237 |
| H | -0.315772 | 2.603295  | -4.125221 |
| H | 0.534572  | 1.075192  | -4.710059 |
| C | -1.405851 | 0.790140  | -3.930842 |
| C | -2.641923 | 1.262163  | -3.290080 |
| H | -1.369791 | -0.276782 | -4.130047 |
| H | -3.403076 | 0.505067  | -3.146637 |
| C | -2.876712 | 2.498170  | -2.838467 |
| H | -2.156694 | 3.299871  | -2.932059 |
| H | -3.812655 | 2.740618  | -2.352955 |
| C | 2.818603  | 1.831008  | 1.277045  |
| C | 4.166032  | 2.582260  | 1.287873  |
| H | 2.225282  | 2.091158  | 2.157820  |
| H | 3.010606  | 0.757550  | 1.341858  |
| C | 5.083786  | 2.186885  | 2.459006  |
| H | 4.697204  | 2.370081  | 0.351026  |
| H | 3.990183  | 3.665028  | 1.311660  |
| C | 6.480888  | 2.773895  | 2.232460  |
| C | 4.521886  | 2.656743  | 3.803805  |
| H | 5.169001  | 1.089794  | 2.478718  |
| H | 5.205220  | 2.385806  | 4.609375  |
| H | 4.393243  | 3.740579  | 3.808271  |
| H | 3.556434  | 2.191370  | 4.003872  |



|   |          |          |          |
|---|----------|----------|----------|
| H | 7.145356 | 2.488577 | 3.048710 |
| H | 6.901980 | 2.402299 | 1.297416 |
| H | 6.436913 | 3.863308 | 2.185532 |

## Stage 2

**Table S15: *i*-C<sub>4</sub>H<sub>9</sub>-C-AS-C**

| Atom | x                 | y                 | z                 |
|------|-------------------|-------------------|-------------------|
| C    | 0.98240627357901  | 0.17484011241326  | -0.44324679733516 |
| Al   | 1.35949115069694  | -1.32879339285957 | -1.66280850301570 |
| Cl   | -0.12976230335329 | -1.06506542475161 | -3.44760056926342 |
| Nd   | 1.76948112491398  | -0.35899689465464 | -5.41375261728986 |
| C    | -0.16111695780439 | -1.40748700769344 | -7.06832143823047 |
| C    | -0.42718713906399 | -0.04454951206790 | -6.92220815676225 |
| C    | 1.51945531237066  | 0.03992744135267  | 0.98776685484771  |
| C    | 1.11876817770838  | 1.26158289682596  | 1.82344317644272  |
| C    | 3.03919448912472  | -0.13333547768469 | 1.00565689775947  |
| C    | 1.50987252270358  | -3.26334236726015 | -1.26836497377033 |
| C    | 0.65027306088759  | -3.80602301980968 | -0.11810052036053 |
| C    | 0.91999436383554  | -5.30221081419772 | 0.08483683022473  |
| Cl   | 3.22452119210287  | -0.86683336952556 | -2.93385545698445 |
| C    | -0.83898796546875 | -3.56615638094478 | -0.37339918261283 |
| Cl   | 1.54680844440940  | 2.22986903411024  | -4.27885237080780 |
| Al   | 3.77298080887464  | 2.82976049647177  | -4.54200143630162 |
| C    | 4.74796104984093  | 2.55585606438199  | -2.84875599175311 |
| C    | 4.84017921917054  | 3.77045253685205  | -1.91599841689102 |
| C    | 5.62178631061144  | 3.40207868180212  | -0.64923858488631 |
| Cl   | 4.27312457822091  | 0.95593079735844  | -5.86748772213116 |
| C    | 3.75226466519840  | 4.43761790650092  | -5.68950735210378 |
| C    | 5.04376991611253  | 5.26826378623584  | -5.69544103354218 |
| C    | 4.87979850928155  | 6.49900912959921  | -6.59547118654187 |
| C    | 6.24413574622084  | 4.43657530892985  | -6.15191257385645 |
| C    | 3.45369069584469  | 4.29951973066572  | -1.54409251722006 |
| C    | 0.44019696334634  | 0.96217757961434  | -7.31651689398632 |
| H    | 1.37881524580993  | 1.09347229740566  | -0.89511382716458 |
| H    | -0.10715515207332 | 0.31272084825176  | -0.39765647422189 |
| H    | 1.27983553922720  | -3.83284622241605 | -2.17952677235245 |
| H    | 2.56555432647832  | -3.47495563454357 | -1.04453387675418 |
| H    | 3.50495880788608  | 4.15550970732577  | -6.72033947316527 |
| H    | 2.92500341572069  | 5.07954421142596  | -5.35436860381970 |
| H    | 4.27566361244719  | 1.72553678284978  | -2.31105077701532 |
| H    | 5.76632858435660  | 2.21572088412144  | -3.08458620478733 |
| H    | 5.39025468924785  | 4.58149407472671  | -2.42297982943815 |
| H    | 5.69559797015671  | 4.26216912825387  | 0.01828069296635  |
| H    | 5.12152666029993  | 2.58856234613093  | -0.12002594615105 |
| H    | 6.62904273930854  | 3.07559733709374  | -0.91257654127479 |
| H    | 3.53575559722415  | 5.15724210868468  | -0.87484461447560 |
| H    | 2.91670013599327  | 4.61506980795298  | -2.44698065508072 |
| H    | 2.86700269497288  | 3.52449334859013  | -1.04452319897694 |
| H    | 5.24775261844951  | 5.62883042701343  | -4.67323172580260 |
| H    | 7.15335839777881  | 5.03975162842896  | -6.14600974596399 |

|   |                   |                   |                    |
|---|-------------------|-------------------|--------------------|
| H | 6.39014059198857  | 3.58523094030390  | -5.47612430666314  |
| H | 6.08760824977175  | 4.05399061490851  | -7.16330042084098  |
| H | 5.78529694187514  | 7.10772095748205  | -6.57769544278245  |
| H | 4.68203139443733  | 6.19383907416348  | -7.62473004405320  |
| H | 4.04343542700499  | 7.10729324602799  | -6.24722607664495  |
| H | 1.06976063365299  | -0.84919474709415 | 1.46158085349327   |
| H | 0.92431114606576  | -3.28936805704465 | 0.81690814172976   |
| H | 3.39847660349592  | -0.25991048982698 | 2.02813848452941   |
| H | 3.32522360111940  | -1.01932497108372 | 0.42571422428757   |
| H | 3.53133697390130  | 0.74039649216820  | 0.57184308895073   |
| H | 1.47198166068799  | 1.15225511696273  | 2.85015818803768   |
| H | 1.54991783436520  | 2.17024437440952  | 1.39907539396566   |
| H | 0.03270079229355  | 1.36569031748567  | 1.83702297057909   |
| H | -1.43744041729731 | -3.95419327513198 | 0.45229188237950   |
| H | -1.03492922777890 | -2.49095795098405 | -0.46714011634017  |
| H | -1.15718069508823 | -4.05870806035230 | -1.29547413072674  |
| H | 0.32575660945327  | -5.68741939992966 | 0.91508685970187   |
| H | 0.66616100092717  | -5.86068609658441 | -0.81801267257437  |
| H | 1.97604033844872  | -5.46347975517158 | 0.30745719860853   |
| H | 0.44633247420286  | -1.75114411783748 | -7.89917369894425  |
| H | -0.85926901000894 | -2.12933196480430 | -6.66976084578654  |
| H | -1.24943554497025 | 0.24116511487302  | -6.26860885859316  |
| H | 0.19093405777900  | 1.99201038609795  | -7.09747482161908  |
| C | 3.53848571864885  | -2.35725730660460 | -7.20573146569580  |
| H | 2.70885883023554  | -2.62983557882084 | -7.84518793405118  |
| H | 4.36255664030895  | -1.83474075901818 | -7.67066969195071  |
| C | 3.58873801807851  | -2.69028948211698 | -5.90450210482443  |
| C | 2.53560683187814  | -3.35455711869265 | -5.13077176101376  |
| H | 4.46780959280330  | -2.40310720927736 | -5.33661406392581  |
| H | 2.73006013051295  | -3.44777431383259 | -4.06984228069512  |
| C | 1.36389386234013  | -3.79480655435514 | -5.61119471179324  |
| H | 1.11690772790637  | -3.76702163121412 | -6.66210810446148  |
| H | 0.62313528219819  | -4.22381048046845 | -4.95003332914028  |
| C | 1.53037984716700  | 0.71278593846563  | -8.32673001824638  |
| C | 2.25442508994176  | 1.99158271715204  | -8.76397391350958  |
| H | 2.28766196649187  | -0.02007228967858 | -7.96130515061087  |
| H | 1.11012373836329  | 0.18892342668869  | -9.19552968542742  |
| C | 3.24401882069828  | 1.79941118943813  | -9.92623317876605  |
| H | 1.49830959557389  | 2.72248683351282  | -9.07355846808267  |
| H | 2.78737817339813  | 2.42368453404028  | -7.91160223519555  |
| C | 3.75581785973101  | 3.16871297298044  | -10.38408180641808 |
| C | 4.42070157720753  | 0.89875370518107  | -9.54270041088781  |
| H | 2.70642749219230  | 1.33236299570574  | -10.76481358857237 |
| H | 5.13645427871118  | 0.84914876571760  | -10.36395926349579 |
| H | 4.93045431875158  | 1.28872410260340  | -8.65975662546995  |
| H | 4.07745512965740  | -0.11347855145199 | -9.32983582785724  |

|   |                  |                  |                    |
|---|------------------|------------------|--------------------|
| H | 4.43300830708481 | 3.05450867752583 | -11.23099732920624 |
| H | 2.92367652422427 | 3.80463952061333 | -10.68879595141064 |
| H | 4.29379411691781 | 3.66553922390792 | -9.57448384013443  |

## Stage 2

**Table S16: *i*-C<sub>4</sub>H<sub>9</sub>-T-AS-C**

| Atom | x                 | y                 | z                 |
|------|-------------------|-------------------|-------------------|
| C    | 1.04977354321115  | 0.17446531784530  | -0.45625948392255 |
| Al   | 1.40376994394894  | -1.35169556161275 | -1.65625764443984 |
| Cl   | -0.10349110379805 | -1.10394553178758 | -3.42540660708898 |
| Nd   | 1.75626295795159  | -0.24393988180266 | -5.36568090981881 |
| C    | -0.12593030187880 | -1.26892982746110 | -6.99045894891111 |
| C    | -0.35494900129692 | 0.10983146243322  | -6.96258976626630 |
| C    | 1.57654635164823  | 0.04728017053980  | 0.97877889354537  |
| C    | 1.16679537104791  | 1.27174976197771  | 1.80609654103938  |
| C    | 3.09654110518784  | -0.12095608413641 | 1.00836778665593  |
| C    | 1.55992938617111  | -3.27799987429171 | -1.23096283613617 |
| C    | 0.70196665288599  | -3.80202633341961 | -0.07148495558314 |
| C    | 0.96474089564414  | -5.29690206014699 | 0.14915427140378  |
| Cl   | 3.25635779989964  | -0.92161328743861 | -2.96997365849574 |
| C    | -0.78709902086759 | -3.55704178037461 | -0.32324757309894 |
| Cl   | 1.47541779818471  | 2.29233634407729  | -4.17155222471750 |
| Al   | 3.69177015013750  | 2.95083446036707  | -4.43794214020433 |
| C    | 4.68108981606751  | 2.63972674242562  | -2.75980675098814 |
| C    | 4.78909766919451  | 3.83198954099445  | -1.80104494426539 |
| C    | 5.59762507572258  | 3.43848391324958  | -0.55897715685849 |
| Cl   | 4.23042929181944  | 1.12731083100601  | -5.80290139389420 |
| C    | 3.63074978258174  | 4.56557322868682  | -5.57196246184888 |
| C    | 4.92025147229595  | 5.39825072237320  | -5.61978307844946 |
| C    | 4.73939028585055  | 6.60242316682194  | -6.55199952488797 |
| C    | 6.11787990929276  | 4.55985717536225  | -6.07147791487822 |
| C    | 3.40938123821004  | 4.35040760786166  | -1.39153347243859 |
| C    | 0.56663930980205  | 1.05662292541384  | -7.38010536959275 |
| H    | 1.45938444676438  | 1.08360820004250  | -0.91496935572744 |
| H    | -0.03825414799242 | 0.32680356986276  | -0.41851663855619 |
| H    | 1.33126294389835  | -3.85868762969893 | -2.13509194126227 |
| H    | 2.61646000452145  | -3.48354091096263 | -1.00619942457904 |
| H    | 3.35389335674424  | 4.27327434057861  | -6.59333020329247 |
| H    | 2.81200175611621  | 5.20731888200696  | -5.21691027451483 |
| H    | 4.21529621308292  | 1.79474194945058  | -2.23826542174054 |
| H    | 5.69546527116010  | 2.30419151959195  | -3.01828564769990 |
| H    | 5.32750730115829  | 4.65508777847341  | -2.30150619683904 |
| H    | 5.67869217511956  | 4.28237722712937  | 0.12808231390533  |
| H    | 5.11434370001242  | 2.60812479965121  | -0.04034332823613 |
| H    | 6.60189736353006  | 3.12662015575714  | -0.85007551743484 |
| H    | 3.50319156193166  | 5.19620822610241  | -0.70873053434704 |
| H    | 2.85381126087174  | 4.68084440044979  | -2.27780593198094 |
| H    | 2.83457222749518  | 3.56521572720063  | -0.89436227683711 |
| H    | 5.13734018857531  | 5.78669033120152  | -4.61071321505299 |
| H    | 7.02390496991126  | 5.16738240267385  | -6.09556112758245 |

|   |                   |                   |                    |
|---|-------------------|-------------------|--------------------|
| H | 6.27888108789178  | 3.72766392577425  | -5.37549650849851  |
| H | 5.94829352559220  | 4.14958683872699  | -7.06987765892247  |
| H | 5.64158951614794  | 7.21623765876712  | -6.56137346516748  |
| H | 4.53271930283546  | 6.26627668445529  | -7.56991063880468  |
| H | 3.90324835976002  | 7.21577386201519  | -6.21230223825713  |
| H | 1.12530236905022  | -0.84043418708651 | 1.45394348929463   |
| H | 0.98259995045247  | -3.27531846461714 | 0.85589749549143   |
| H | 3.44715798493185  | -0.25599799906106 | 2.03277490870213   |
| H | 3.39176493304160  | -0.99944739150132 | 0.42191195926164   |
| H | 3.58749005785496  | 0.76003495826827  | 0.58848206987602   |
| H | 1.51659392228551  | 1.16963000164569  | 2.83469662854159   |
| H | 1.59552364281790  | 2.18000804275130  | 1.37845929539605   |
| H | 0.08026310188028  | 1.37121821543621  | 1.81493196502006   |
| H | -1.38413214430295 | -3.93264262125444 | 0.50917843277627   |
| H | -0.97737978352634 | -2.48174348015969 | -0.42764718405713  |
| H | -1.11196389892362 | -4.05765961987931 | -1.23859881434555  |
| H | 0.37062155433326  | -5.66841084220141 | 0.98570410161872   |
| H | 0.70571109191849  | -5.86518601245741 | -0.74601667318214  |
| H | 2.02051668176730  | -5.46056897138874 | 0.37122931573578   |
| H | 0.50415421806203  | -1.69445103196450 | -7.76672221592121  |
| H | -0.86051253961957 | -1.94056447791781 | -6.56838185337276  |
| H | -1.19174738888248 | 0.46885604773952  | -6.36462654846298  |
| H | 0.34462403633555  | 2.10711176466361  | -7.24414713132319  |
| C | 4.23365311261304  | -2.19005237028319 | -6.33319318907635  |
| H | 4.74902947360918  | -2.06556477609942 | -5.38804487762145  |
| H | 4.68753464166222  | -1.73449271261512 | -7.20197475619952  |
| C | 3.09438584604282  | -2.89261364506187 | -6.42218530540664  |
| C | 2.43090466494227  | -3.52143885162828 | -5.28719772170877  |
| H | 2.60863354462392  | -2.99775145850905 | -7.38799739562094  |
| H | 2.94817563339415  | -3.48164921656405 | -4.33399937570708  |
| C | 1.22512180656746  | -4.09253301575683 | -5.36498670605887  |
| H | 0.67805260124551  | -4.13207528014591 | -6.29895858559949  |
| H | 0.75041266342240  | -4.52611182497943 | -4.49501872728517  |
| C | 1.67297729540696  | 0.70482197728690  | -8.34933337913109  |
| C | 2.43988608393419  | 1.93304270357282  | -8.85316974608381  |
| H | 2.40158736289484  | -0.01479136607783 | -7.91626209531101  |
| H | 1.25401870144896  | 0.13818439305489  | -9.19134646204729  |
| C | 3.50372453049521  | 1.62844587994791  | -9.92271889440155  |
| H | 1.71470830215625  | 2.63583839664652  | -9.28034685167358  |
| H | 2.91791983420913  | 2.44024845396687  | -8.00936846147586  |
| C | 4.06834002864688  | 2.94801456792688  | -10.45847370350569 |
| C | 4.63792324656187  | 0.75232058548332  | -9.38418000636383  |
| H | 3.01698212760832  | 1.09602513835215  | -10.75336765812192 |
| H | 5.39889249638805  | 0.61383400922602  | -10.15297167293416 |
| H | 5.10332022524885  | 1.21870366206153  | -8.51419931282748  |
| H | 4.26468115284396  | -0.23058189594084 | -9.09565704599918  |

|   |                  |                  |                    |
|---|------------------|------------------|--------------------|
| H | 4.80961282209429 | 2.75449509440760 | -11.23436722797652 |
| H | 3.27138689250364 | 3.55835589963996 | -10.88513329715289 |
| H | 4.54578087791642 | 3.51287813085945 | -9.65535504418954  |

## Stage 2

**Table S16: *i*-C<sub>4</sub>H<sub>9</sub>-T-AS-T**

| Atom | x                 | y                 | z                 |
|------|-------------------|-------------------|-------------------|
| C    | -2.53607092743113 | -1.70019661692846 | 1.85639185009360  |
| Al   | -3.02934484179519 | -0.72580597030798 | 0.21570876686892  |
| Cl   | -2.08160241716050 | 1.40426452257189  | 0.46525519154906  |
| Nd   | 0.10418625548406  | 0.94633528348946  | -1.24043851322295 |
| C    | 0.27669278660567  | 3.41967707945166  | -1.80217614104287 |
| C    | 0.81752038275778  | 3.45293075887446  | -0.49303985319035 |
| C    | -3.31985275443723 | -2.98879770057108 | 2.13744808846203  |
| C    | -2.81393831098810 | -3.64346622848569 | 3.42866673637255  |
| C    | -3.21884119663053 | -3.97393815000687 | 0.97149597158038  |
| C    | -4.77538958585540 | -0.50628074447893 | -0.68301838992790 |
| C    | -6.01292529181365 | -0.40452159037320 | 0.21829641685768  |
| C    | -7.27275964248350 | -0.21455282020801 | -0.63601534347808 |
| Cl   | -1.59439152075940 | -1.36040453390487 | -1.49650201103352 |
| C    | -5.88138069731868 | 0.73950376014468  | 1.22564083781324  |
| Cl   | 1.34101076237549  | -0.61707155701717 | 0.78221900395021  |
| Al   | 2.58183537622265  | -1.89173596835249 | -0.69492805933169 |
| C    | 1.57697590013474  | -3.53697111662572 | -1.12001713738416 |
| C    | 1.93470247570271  | -4.77825545070432 | -0.29229630141645 |
| C    | 1.05422278611429  | -5.96282798459368 | -0.70883349559630 |
| Cl   | 2.16564261551510  | -0.46377902628747 | -2.53867966409996 |
| C    | 4.46925734269302  | -1.65298466056666 | -0.17548317145354 |
| C    | 5.45883272266649  | -2.67515598925141 | -0.75220332367350 |
| C    | 6.87754988656587  | -2.38052216802406 | -0.24991429275080 |
| C    | 5.43086202985834  | -2.68035529523256 | -2.28198664614538 |
| C    | 1.78855410302025  | -4.51630492055934 | 1.20779274279150  |
| C    | 1.89218084639479  | 2.71081799209867  | -0.07547467157868 |
| H    | -1.46379499224983 | -1.92984999794037 | 1.80103285588739  |
| H    | -2.65360884040730 | -1.02159332718870 | 2.71265111598648  |
| H    | -4.71656201751195 | 0.39125872548892  | -1.31209150805102 |
| H    | -4.91270231754822 | -1.34960472303140 | -1.37443746590277 |
| H    | 4.79049031778866  | -0.64199617067746 | -0.45820803427652 |
| H    | 4.52572055748503  | -1.68778080013378 | 0.92125409522121  |
| H    | 0.50820925605955  | -3.31988245019588 | -1.00146922484297 |
| H    | 1.71972566155577  | -3.77137704817469 | -2.18396105275059 |
| H    | 2.98375257186116  | -5.05679026879180 | -0.48950519520751 |
| H    | 1.33059880098096  | -6.85860347178436 | -0.15046298755890 |
| H    | 0.00302714884361  | -5.73983678478402 | -0.51669780365120 |
| H    | 1.17754627023118  | -6.16350355731745 | -1.77409995954192 |
| H    | 2.05468059647652  | -5.40541799967222 | 1.78131485722134  |
| H    | 2.45130676719028  | -3.69690617369111 | 1.51315116323178  |
| H    | 0.76007345910758  | -4.24062366318444 | 1.45373379478410  |
| H    | 5.18387761275641  | -3.68387384166620 | -0.40150694770785 |
| H    | 6.13587189208907  | -3.41385678344374 | -2.67598415849669 |



|   |                   |                   |                   |
|---|-------------------|-------------------|-------------------|
| H | 4.42658248359530  | -2.94048031623898 | -2.63819156340495 |
| H | 5.69563017855270  | -1.69640899793156 | -2.67664483544815 |
| H | 7.58090054030009  | -3.11811827198459 | -0.63957978695415 |
| H | 7.19564139447752  | -1.38703974142811 | -0.57142066835702 |
| H | 6.90225588705144  | -2.41685716175087 | 0.84041134210430  |
| H | -4.38473557528115 | -2.74088369243474 | 2.28415827614368  |
| H | -6.13082420495555 | -1.34515884456886 | 0.78156651547805  |
| H | -3.78378790947955 | -4.88259254776923 | 1.18489880495272  |
| H | -3.62601905831544 | -3.52021381354075 | 0.05950914224461  |
| H | -2.17724824010838 | -4.24801795045412 | 0.78816065943566  |
| H | -3.39080952854746 | -4.54235933187690 | 3.65170854346851  |
| H | -1.76185006035264 | -3.91671424418307 | 3.32820753019362  |
| H | -2.91419955000308 | -2.94813320073688 | 4.26351886861991  |
| H | -6.77021917205261 | 0.80019087774098  | 1.85558193729899  |
| H | -5.01054302731856 | 0.57237543935184  | 1.87176840476196  |
| H | -5.75389841335545 | 1.69506196064975  | 0.71067364509047  |
| H | -8.15984145550789 | -0.17095557256852 | -0.00208201966106 |
| H | -7.20576474392617 | 0.71084729342847  | -1.21109491193497 |
| H | -7.38101337456567 | -1.04843341300840 | -1.33146055569498 |
| H | 0.97612494738496  | 3.29893057518480  | -2.63425720080819 |
| H | -0.57065978241777 | 4.05479399133566  | -2.02847726141306 |
| H | 0.20549662360604  | 3.91293991411750  | 0.28234965075947  |
| H | 2.57780122303721  | 2.33073642720411  | -0.83943022137131 |
| C | -0.63660850413110 | 0.68807149127644  | -4.28941864200459 |
| H | -0.90759866032354 | -0.35433794320692 | -4.16894223681597 |
| H | 0.34636143456893  | 0.89583736373131  | -4.69163438094835 |
| C | -1.50152238736781 | 1.67801661608574  | -4.01365355186902 |
| C | -2.84979703933715 | 1.48168777219469  | -3.50283221742873 |
| H | -1.19415096400462 | 2.70593435222186  | -4.17606815443436 |
| H | -3.16913475398650 | 0.45726106223289  | -3.33886152384870 |
| C | -3.67634005232896 | 2.49037989998656  | -3.21786679045801 |
| H | -3.38041908362723 | 3.52363597539310  | -3.36080597837185 |
| H | -4.67157301438109 | 2.31474598096083  | -2.83110297352987 |
| C | 2.40144946142505  | 2.64980300871539  | 1.34890047064265  |
| C | 3.84044213932675  | 2.11933933916609  | 1.41928522102375  |
| H | 2.34356812318883  | 3.64711905223789  | 1.79551838438451  |
| H | 1.75553302371838  | 2.00632609007264  | 1.95456620166439  |
| C | 4.34848112106026  | 1.88332312959710  | 2.85197753489984  |
| H | 3.88982660085412  | 1.16423039845631  | 0.88425538722040  |
| H | 4.51949276684604  | 2.81064784345221  | 0.90307133637423  |
| C | 5.70694615933140  | 1.17750223652222  | 2.80439041497910  |
| C | 4.46035420392715  | 3.19184998619184  | 3.64057086996279  |
| H | 3.63330939355974  | 1.22449921419084  | 3.36774970038612  |
| H | 4.86989777970749  | 2.99670289642346  | 4.63230607971578  |
| H | 5.11769649016778  | 3.89509222471725  | 3.12616547610191  |
| H | 3.48137660032674  | 3.65617587006239  | 3.76225864969786  |

|   |                  |                  |                  |
|---|------------------|------------------|------------------|
| H | 6.05291570625806 | 0.95432486221337 | 3.81400149054125 |
| H | 5.63043775122901 | 0.24104020707115 | 2.24916925954401 |
| H | 6.44956569202795 | 1.80887512353363 | 2.31329654170945 |

## Stage 2

**Table S17: *i*-C<sub>4</sub>H<sub>9</sub>-C-AS-trans-cis transition state**

| Atom | x                 | y                 | z                 |
|------|-------------------|-------------------|-------------------|
| C    | 1.05334475820308  | 0.38972925886588  | -0.66579579334018 |
| Al   | 1.19321770221253  | -1.34856852545841 | -1.58882712717283 |
| Cl   | -0.17452263506693 | -1.17179585146800 | -3.48155948944040 |
| Nd   | 1.87482221184197  | -0.70048678107041 | -5.34385831681144 |
| C    | 0.60953041648268  | -2.22280100476880 | -7.16363918192720 |
| C    | -0.22912327619699 | -1.12213786797811 | -6.95596898798617 |
| C    | 1.41685444060300  | 0.38787021373131  | 0.82412257963594  |
| C    | 1.24127582036870  | 1.79071443163453  | 1.41721942798056  |
| C    | 2.84665527605832  | -0.10551072958961 | 1.05149731010962  |
| C    | 1.00374914274647  | -3.19266018271348 | -0.90873936143768 |
| C    | -0.01773360387019 | -3.40422743915391 | 0.21819376441691  |
| C    | -0.08542010292805 | -4.88810535368208 | 0.59969203293111  |
| Cl   | 3.13926024578652  | -1.36090725658646 | -2.85296415143239 |
| C    | -1.40676069683216 | -2.89872573178488 | -0.17764252714409 |
| Cl   | 1.61782952742585  | 1.98249563176169  | -4.47488525355250 |
| Al   | 3.88248362197722  | 2.47656003087434  | -4.55644415014329 |
| C    | 4.68623716886241  | 2.15752507989426  | -2.78338173219447 |
| C    | 4.90697835518107  | 3.40885556828119  | -1.92461405289442 |
| C    | 5.57943202357785  | 3.03531261492200  | -0.59876533035704 |
| Cl   | 4.38499903646476  | 0.55140417693020  | -5.82069302208033 |
| C    | 4.05011656794163  | 4.06150286617593  | -5.72036512979916 |
| C    | 5.38347064837696  | 4.81757791702292  | -5.64121668628902 |
| C    | 5.36644676087749  | 6.02853583016867  | -6.58221082027192 |
| C    | 6.56677075410186  | 3.90782983963431  | -5.97754212513907 |
| C    | 3.59275197191487  | 4.14575944744395  | -1.66132107822865 |
| C    | 0.14311025325189  | 0.19247106414295  | -7.17583265893491 |
| H    | 1.68812693247134  | 1.11398831379599  | -1.19206916709339 |
| H    | 0.02480454348527  | 0.75988950269887  | -0.77825728619602 |
| H    | 0.74329098477386  | -3.84245395916589 | -1.75592241612619 |
| H    | 1.98670690415022  | -3.53940312750735 | -0.55993264730525 |
| H    | 3.87108620688823  | 3.76232798936710  | -6.75962624235107 |
| H    | 3.23585905081218  | 4.75561381408844  | -5.46781036557991 |
| H    | 4.05766108482159  | 1.44605669388887  | -2.23414012132479 |
| H    | 5.65150037384983  | 1.65182101533716  | -2.92556581408517 |
| H    | 5.58459190381557  | 4.09970505331303  | -2.45529723627124 |
| H    | 5.76668705257982  | 3.92890522371310  | -0.00100762262882 |
| H    | 4.94112710259888  | 2.35928431108448  | -0.02670510075277 |
| H    | 6.53068784933972  | 2.53587026685180  | -0.78899120347629 |
| H    | 3.76515314065609  | 5.03670316930089  | -1.05551371004139 |
| H    | 3.13723707794106  | 4.45498740580422  | -2.61010705561715 |
| H    | 2.88780384216820  | 3.49854872510390  | -1.13410113631096 |
| H    | 5.52517913184801  | 5.19679506192473  | -4.61538546155402 |
| H    | 7.50668058010426  | 4.45651324622359  | -5.89912890145159 |

|   |                   |                   |                    |
|---|-------------------|-------------------|--------------------|
| H | 6.60136703145396  | 3.06185695393600  | -5.28030430309515  |
| H | 6.47721191834860  | 3.51682010411768  | -6.99387513631486  |
| H | 6.29778346500301  | 6.59079855770572  | -6.49630693050610  |
| H | 5.24734249703386  | 5.70382235309219  | -7.61757988866927  |
| H | 4.53561732180054  | 6.68845979277552  | -6.32731032587274  |
| H | 0.73264656148841  | -0.28909458192061 | 1.36390056824098   |
| H | 0.30689612677765  | -2.84520105939967 | 1.11123440322759   |
| H | 3.08349628815151  | -0.12234510512106 | 2.11639127711938   |
| H | 2.96280387437846  | -1.12147230781711 | 0.65432606369389   |
| H | 3.56342019341988  | 0.54698564210157  | 0.54751699813877   |
| H | 1.47046545895215  | 1.78531317638468  | 2.48411545164287   |
| H | 1.90702413941254  | 2.49843862373954  | 0.91957139683341   |
| H | 0.21252996526380  | 2.12834509372651  | 1.28203557349560   |
| H | -2.12032028263734 | -3.06481306310302 | 0.63093451103669   |
| H | -1.36908496645024 | -1.82282489425573 | -0.38837433407730  |
| H | -1.76667783657298 | -3.41587642545070 | -1.07061218146251  |
| H | -0.78233165212786 | -5.03757800023384 | 1.42599726996574   |
| H | -0.41732260374366 | -5.48474591626676 | -0.25203983455435  |
| H | 0.90087214952282  | -5.23965274129612 | 0.90682758628064   |
| H | 1.35576006309069  | -2.20028973610076 | -7.95356343247213  |
| H | 0.25941046457223  | -3.21052424008446 | -6.89368550398432  |
| H | -1.12997107756385 | -1.28416743298803 | -6.36899553427182  |
| H | -0.53802137244758 | 0.98727073918784  | -6.89896441933081  |
| C | 5.88262570001007  | -3.39080375346866 | -7.69042771595733  |
| H | 6.37584585338510  | -4.15248168127869 | -7.09697373962054  |
| H | 6.27978293655033  | -3.20309983561857 | -8.68009741655479  |
| C | 4.83589046075792  | -2.71657709243612 | -7.23103411839070  |
| C | 4.24284783702814  | -2.91285704634054 | -5.88518949519865  |
| H | 4.38080202065812  | -1.95275782182579 | -7.85702379745323  |
| H | 4.75881209695574  | -2.44391468940216 | -5.05051603778662  |
| C | 3.14324264543983  | -3.63103205287143 | -5.64564528726484  |
| H | 2.61207247733652  | -4.13617423492727 | -6.44067503557614  |
| H | 2.77816687773398  | -3.77073498871407 | -4.63336293492261  |
| C | 1.26704509031418  | 0.54524722191195  | -8.12546347624372  |
| C | 1.45156488531260  | 2.05312225962487  | -8.34222672655814  |
| H | 2.24264071588445  | 0.11651210838747  | -7.81104719015535  |
| H | 1.09005440451989  | 0.03891800559877  | -9.08341220581572  |
| C | 2.35477714177953  | 2.40483905919248  | -9.53704016266846  |
| H | 0.46653714935239  | 2.50100408190357  | -8.51904597657973  |
| H | 1.85072665266158  | 2.51911904260668  | -7.43512904958658  |
| C | 2.39136623262943  | 3.92591338282905  | -9.71239113844713  |
| C | 3.77411862409341  | 1.85333583929106  | -9.38161960169417  |
| H | 1.91176648186387  | 1.96367248712285  | -10.44257530804199 |
| H | 4.39787707176087  | 2.19125166390267  | -10.20987994297002 |
| H | 4.22123046463426  | 2.20114838571400  | -8.44818119557212  |
| H | 3.77061500150202  | 0.76304219873738  | -9.38172202163622  |

|   |                  |                  |                    |
|---|------------------|------------------|--------------------|
| H | 3.00632688773123 | 4.19336199896749 | -10.57222387111974 |
| H | 1.38494303943106 | 4.31535099961664 | -9.87103669666026  |
| H | 2.81103939387942 | 4.40261474169416 | -8.82427727591865  |

## Stage 2

**Table S18: *i*-C<sub>4</sub>H<sub>9</sub>-T-AS-trans-cis transition state**

| Atom | x                 | y                 | z                 |
|------|-------------------|-------------------|-------------------|
| C    | -2.85165172645211 | -1.91822210637752 | 1.85781750648974  |
| Al   | -3.40934583191736 | -0.72523582626036 | 0.39241864439524  |
| Cl   | -2.23465485763321 | 1.29660431868334  | 0.81135312294701  |
| Nd   | -0.23463514351841 | 0.84421488092973  | -1.07522154750275 |
| C    | 0.65021057758918  | 3.09617529526107  | -1.83366283058409 |
| C    | 1.18725027595901  | 3.09393103338700  | -0.51527414356252 |
| C    | -3.61584212970408 | -3.24211510100943 | 1.98688642772037  |
| C    | -3.04303966024332 | -4.06780728333679 | 3.14536431299171  |
| C    | -3.56484734935147 | -4.05092295546768 | 0.68929970805316  |
| C    | -5.20071575733980 | -0.23291361366975 | -0.27573990275848 |
| C    | -6.32875579680018 | -0.16886204160748 | 0.76331854841715  |
| C    | -7.64776772100240 | 0.22090956733016  | 0.08439334430976  |
| Cl   | -2.19250707512645 | -1.22857182344159 | -1.50405731190268 |
| C    | -6.00191467208008 | 0.81721785680067  | 1.88641796391599  |
| Cl   | 0.80405755064069  | -1.03752295932891 | 0.76434068429991  |
| Al   | 2.16877677494577  | -2.08328733734353 | -0.77900323835480 |
| C    | 1.43691959770631  | -3.87112836596084 | -1.17139778033099 |
| C    | 1.94858790857657  | -5.02780858569192 | -0.30195195539521 |
| C    | 1.20792480068151  | -6.32223913813621 | -0.65882805387350 |
| Cl   | 1.45179624130219  | -0.77439136687595 | -2.62505151100318 |
| C    | 3.98157282547067  | -1.45997392150830 | -0.30672880216253 |
| C    | 5.17245040186178  | -2.25977279080408 | -0.85134117859160 |
| C    | 6.48887612848844  | -1.62774367526436 | -0.38185706128150 |
| C    | 5.14102873708871  | -2.34138554545741 | -2.37871012025115 |
| C    | 1.78958164545791  | -4.72548376016597 | 1.18949595876137  |
| C    | 2.02798027363563  | 2.14054087873501  | -0.00646380982592 |
| H    | -1.78298132251598 | -2.12995198020277 | 1.72554036589631  |
| H    | -2.93319186083620 | -1.37168022044140 | 2.80782450364408  |
| H    | -5.13174295353073 | 0.73643013820197  | -0.78844628282153 |
| H    | -5.47938821514108 | -0.95981557498439 | -1.05203879730364 |
| H    | 4.07743316681836  | -0.41507520250206 | -0.63105997189963 |
| H    | 4.04750602521348  | -1.43396801658051 | 0.79004748592766  |
| H    | 0.34465257843553  | -3.80377045202854 | -1.07724737910857 |
| H    | 1.63134035023844  | -4.11052070433895 | -2.22593802292767 |
| H    | 3.02050647731187  | -5.18786908253031 | -0.50578019623544 |
| H    | 1.59416976642308  | -7.15687548851208 | -0.07143436016087 |
| H    | 0.14017195612064  | -6.21557443506281 | -0.45773824106393 |
| H    | 1.34117896054833  | -6.54904210455641 | -1.71780556660547 |
| H    | 2.14501361450416  | -5.56301988536376 | 1.79179293346493  |
| H    | 2.37344673889571  | -3.83562215901193 | 1.45673746651331  |
| H    | 0.74078906038986  | -4.54074904296936 | 1.43580881432025  |
| H    | 5.13382687354097  | -3.28691988939002 | -0.45218227832984 |
| H    | 5.99251878436456  | -2.91380022771644 | -2.74978716122866 |

|   |                   |                   |                   |
|---|-------------------|-------------------|-------------------|
| H | 4.22033441543606  | -2.83739050242344 | -2.70929672846353 |
| H | 5.17523263346317  | -1.34201741488852 | -2.81963426248808 |
| H | 7.34079749429660  | -2.20668916254859 | -0.74180768914573 |
| H | 6.57472370347411  | -0.60604096205378 | -0.75682988565365 |
| H | 6.52142394392069  | -1.59980016883102 | 0.70863354512174  |
| H | -4.67397344914709 | -3.03170471053180 | 2.21743939949143  |
| H | -6.46647589885646 | -1.16631825730327 | 1.21269071544761  |
| H | -4.10119031587338 | -4.99415614555140 | 0.80325142544438  |
| H | -4.03221551385866 | -3.48403343555809 | -0.12513235118020 |
| H | -2.53045015170330 | -4.27067104103517 | 0.41195443377462  |
| H | -3.60288760290622 | -4.99700215947749 | 3.26317928902739  |
| H | -1.99551795171348 | -4.31019884707232 | 2.95663751946677  |
| H | -3.10634393789805 | -3.50124475677013 | 4.07568637789536  |
| H | -6.81549333535322 | 0.85503459789385  | 2.61242142625002  |
| H | -5.08856200435104 | 0.50391192600086  | 2.40672240180770  |
| H | -5.84658234973666 | 1.82180695578433  | 1.48548844057836  |
| H | -8.46092421629867 | 0.23626751246561  | 0.81178698351876  |
| H | -7.56360584258379 | 1.20996468863748  | -0.36957225458432 |
| H | -7.89248626365861 | -0.50010594373307 | -0.69719535042613 |
| H | 1.29472699763971  | 2.73389864617267  | -2.63771227778358 |
| H | 0.02749619054927  | 3.93312453369718  | -2.12638310470511 |
| H | 0.72225631623216  | 3.76771695296455  | 0.20566599455012  |
| H | 2.58256933528831  | 1.51519834253424  | -0.71207509876406 |
| C | -0.50823949106612 | 2.10218820647601  | -6.20759095958316 |
| H | -1.50032228024753 | 2.34040953245736  | -6.57408110118002 |
| H | 0.33025474603908  | 2.37348205910888  | -6.83694064713614 |
| C | -0.32372482057865 | 1.50867079739619  | -5.03374746092972 |
| C | -1.41616413759731 | 1.04256849564843  | -4.15601506668343 |
| H | 0.68178921787722  | 1.23385391094098  | -4.72417223806580 |
| H | -1.58406309790868 | -0.03286050710393 | -4.13062818140895 |
| C | -2.14733357340371 | 1.82587375682178  | -3.35789514806533 |
| H | -2.00145174680290 | 2.89812922927638  | -3.33553238789458 |
| H | -2.95230848679614 | 1.41275509223585  | -2.75935354161839 |
| C | 2.51241634382049  | 2.08093879665421  | 1.41547556115542  |
| C | 4.01194040005251  | 2.42078816174861  | 1.53611392169224  |
| H | 1.91392417192531  | 2.76315459580604  | 2.02631407566536  |
| H | 2.34900366501150  | 1.07781635834321  | 1.81974450660497  |
| C | 4.57171179044779  | 2.21754071281773  | 2.95625089182025  |
| H | 4.57563877833169  | 1.77527667066096  | 0.85093465553053  |
| H | 4.19064902747487  | 3.45502234373286  | 1.21660483909993  |
| C | 6.10159599637840  | 2.28887213573915  | 2.91878118975227  |
| C | 4.01505003584002  | 3.25197119904730  | 3.93914935937219  |
| H | 4.28205124453238  | 1.21394765029651  | 3.30267893383391  |
| H | 4.44826215546003  | 3.09881278222473  | 4.92817437434612  |
| H | 4.25571018164762  | 4.26389237081132  | 3.60841562620052  |
| H | 2.93174185267782  | 3.16249838294572  | 4.02356375535119  |

|   |                  |                  |                  |
|---|------------------|------------------|------------------|
| H | 6.51015319872058 | 2.12978379451691 | 3.91725826194417 |
| H | 6.50088697642640 | 1.52073094315970 | 2.25504863531862 |
| H | 6.43223732535949 | 3.26487486943506 | 2.55965769769645 |



## Stage 2

**Table S19: *i*-C<sub>4</sub>H<sub>9</sub>-C-AS-C-TS inclusion *cis*-C<sub>4</sub>H<sub>8</sub> in polymer. Transition state**

| Atom | x                 | y                 | z                 |
|------|-------------------|-------------------|-------------------|
| C    | 3.88031053803901  | 0.96280462349611  | -1.32238102822077 |
| Al   | 3.66242841592290  | -0.86028920514679 | -2.04734778450734 |
| Cl   | 1.46522881471737  | -0.97108519851797 | -2.83765196505512 |
| Nd   | 2.11575259619264  | -0.80219518024167 | -5.60425848443421 |
| C    | -0.51133283926884 | -2.18681156307759 | -5.85033285285668 |
| C    | -0.63325104078788 | -0.79189147190232 | -5.51133510129166 |
| C    | 4.05639366190054  | -2.60967287158407 | -1.21344573357102 |
| Cl   | 4.59725443675002  | -0.95427932959952 | -4.15656707900957 |
| Cl   | 2.36213484996541  | 2.00146846282915  | -4.90665992986518 |
| Al   | 4.06163629332296  | 2.48394599350557  | -6.39391929781301 |
| C    | 5.80432241605872  | 2.41593377952833  | -5.46745345191329 |
| Cl   | 3.84289352110347  | 0.43442801074440  | -7.50037763280302 |
| C    | 3.37479259988151  | 3.92146680842335  | -7.56621055956882 |
| C    | -0.30988740265721 | 0.24753565800742  | -6.33291550454099 |
| H    | 3.99030800558048  | 1.65383413775273  | -2.16767608933982 |
| H    | 2.94552832852066  | 1.25289272335661  | -0.82275513082898 |
| H    | 3.44140699102909  | -3.37591919815060 | -1.70596007804158 |
| H    | 5.09820919775270  | -2.87634289656499 | -1.44060575028994 |
| H    | 2.63429156051511  | 3.51121486230599  | -8.26320627901156 |
| H    | 2.82239225567435  | 4.63386792252691  | -6.93675536233108 |
| H    | 5.71378876550573  | 1.73389908142657  | -4.61359550333795 |
| H    | 6.53748107991717  | 1.95060284892290  | -6.14136577667027 |
| H    | -0.54489385860560 | -2.40245052622585 | -6.91282415318983 |
| H    | -1.17515601363715 | -2.82209395379309 | -5.28086528925369 |
| H    | -0.93629166188567 | -0.55351211854017 | -4.49660453698344 |
| H    | -0.40971931661213 | 1.25830451427132  | -5.95629742442702 |
| C    | 2.52955110857625  | -2.86965442072470 | -7.78069389726447 |
| H    | 1.46740934967233  | -2.97517114298757 | -7.96208077893494 |
| H    | 3.14650832950399  | -2.64213228800521 | -8.63756983595520 |
| C    | 3.09106102819516  | -3.17379034016465 | -6.57788914789749 |
| C    | 2.37009715546289  | -3.36130885284106 | -5.35841937070764 |
| H    | 4.17315897690089  | -3.11745053104417 | -6.49393765759169 |
| H    | 2.92996200266353  | -3.41461277517428 | -4.43288493021616 |
| C    | 0.97523735475162  | -3.58725486446223 | -5.31747076385309 |
| H    | 0.54520426531432  | -4.16581194667354 | -6.12510696490036 |
| H    | 0.56904071892110  | -3.81198751017575 | -4.34151242668314 |
| C    | 0.05075947111610  | 0.08667424978475  | -7.78323291530976 |
| C    | 0.25067064265340  | 1.42168583270144  | -8.51072962075729 |
| H    | 0.95791253144430  | -0.54225471327082 | -7.92307049407548 |
| H    | -0.72344265769940 | -0.51447941074373 | -8.27493171379733 |
| H    | -0.59768225679273 | 2.07584002485286  | -8.27854835761713 |
| H    | 1.15000878322226  | 1.91606740252992  | -8.13157263291823 |
| C    | 5.04486909003896  | 1.16397410727820  | -0.34334080668393 |

|   |                   |                   |                    |
|---|-------------------|-------------------|--------------------|
| C | 5.10496399787114  | 2.62303894813415  | 0.12357507024528   |
| C | 6.38035723716842  | 0.75614308446958  | -0.96807395190741  |
| C | 3.84755749982578  | -2.70525333378426 | 0.30618258422359   |
| C | 4.17074140306354  | -4.12056292965193 | 0.80060904252864   |
| C | 2.41957914331912  | -2.32397086299593 | 0.70264335994006   |
| C | 6.36382090613634  | 3.76097361448460  | -4.98580886366731  |
| C | 7.70868944881885  | 3.55598179946481  | -4.27905876498338  |
| C | 4.43084836971343  | 4.69460386151335  | -8.36982276581139  |
| C | 3.76836967525780  | 5.81094257029733  | -9.18613139459441  |
| C | 5.22197684641487  | 3.76590923899532  | -9.29313749567905  |
| C | 5.38433469882229  | 4.47693060809874  | -4.05407435996502  |
| H | 6.54292107820879  | 4.41325090253952  | -5.85761382843330  |
| H | 8.12531148210212  | 4.51417643398669  | -3.96403878153859  |
| H | 7.58066947260572  | 2.92338241226098  | -3.39844127557387  |
| H | 8.41634037970740  | 3.07156053599536  | -4.95371906772308  |
| H | 5.79429254543147  | 5.43320617035755  | -3.72547482978054  |
| H | 4.43777830108683  | 4.66678505408892  | -4.57489575315967  |
| H | 5.17736330158914  | 3.86693102472694  | -3.17138648543657  |
| H | 5.14216631430516  | 5.17004079798774  | -7.67381052242313  |
| H | 5.97953563582811  | 4.32613574525563  | -9.84348530651526  |
| H | 5.72576257896004  | 2.98974786864199  | -8.70440602573319  |
| H | 4.55894011691544  | 3.27981728700898  | -10.01294149135942 |
| H | 4.51955460127587  | 6.37853640294252  | -9.73798499528954  |
| H | 3.05516569915394  | 5.38968440916797  | -9.89713521914294  |
| H | 3.23419379023865  | 6.49254690877825  | -8.52212690199614  |
| H | 4.88027197141537  | 0.53556327370233  | 0.54869392313585   |
| H | 4.53851961779748  | -2.01030520411160 | 0.81165201325605   |
| H | 7.19632565153868  | 0.89168397794849  | -0.25649612952016  |
| H | 6.35153739808848  | -0.29972241688608 | -1.26476721089993  |
| H | 6.59014180275985  | 1.35899560074228  | -1.85488863750511  |
| H | 5.91049874162514  | 2.76011026683491  | 0.84699729250238   |
| H | 5.28088286228710  | 3.28562593114083  | -0.72611771844199  |
| H | 4.16136341148688  | 2.90489561007977  | 0.59353859449933   |
| H | 2.28887306597250  | -2.39767882086768 | 1.78347675212467   |
| H | 2.20752308904382  | -1.29146138838403 | 0.39925520580077   |
| H | 1.69491567499804  | -2.98392541442740 | 0.21925028669100   |
| H | 4.05659983431654  | -4.18192321554429 | 1.88424156652536   |
| H | 3.50229616813355  | -4.84764631362448 | 0.33547196029826   |
| H | 5.19893872938264  | -4.38004691842141 | 0.54313223184511   |
| C | 0.35280250514160  | 1.28952847924454  | -10.03933184734560 |
| C | 0.40243804824700  | 2.68511668332660  | -10.66789326808614 |
| C | 1.57248772307415  | 0.47122874795357  | -10.47021101703334 |
| H | -0.55251652337640 | 0.77948788419452  | -10.40125382879414 |
| H | 1.65204563991490  | 0.46440836746560  | -11.55781049792591 |
| H | 2.48810347615814  | 0.89999357705350  | -10.05801642740714 |
| H | 1.48736722213142  | -0.56109160741200 | -10.13002996295216 |

|   |                   |                  |                    |
|---|-------------------|------------------|--------------------|
| H | 0.43301297390182  | 2.60940508630996 | -11.75527873428793 |
| H | -0.47872432545892 | 3.26253142781054 | -10.38522615675601 |
| H | 1.29160740875875  | 3.22261677047476 | -10.33269499562643 |

## Stage 2

**Table S20: *i*-C<sub>4</sub>H<sub>9</sub>-C-AS-T-TS inclusion *trans*-C<sub>4</sub>H<sub>8</sub> in polymer. Transition state**

| Atom | x                 | y                 | z                 |
|------|-------------------|-------------------|-------------------|
| C    | 0.76242859052674  | -0.11486599464079 | -0.82050982533197 |
| Al   | 2.23636114954111  | -1.39862008306927 | -1.09963178512793 |
| C    | 2.78818210348686  | -2.89923811829720 | 0.06459493081797  |
| Cl   | 4.17559579377113  | -0.21858222294535 | -1.57123142152963 |
| Nd   | 4.14950895946845  | -0.69258771103487 | -4.40855678308128 |
| C    | 6.59495093037486  | -1.57115483798764 | -5.04485141192552 |
| Cl   | 2.15713567706431  | 1.34666353271019  | -4.55054656829002 |
| Al   | 3.58063362734564  | 3.09267777513271  | -3.97865611452087 |
| C    | 3.49701253206324  | 4.35441843443737  | -5.49653962147172 |
| Cl   | 5.51905692993047  | 1.81078692531216  | -4.22709686219385 |
| Cl   | 1.99563522309306  | -2.17981271222723 | -3.28137778587025 |
| C    | 3.41675050252343  | 3.46256687280274  | -2.04687390452148 |
| C    | 4.41819182776474  | -0.15237531632570 | -6.94213406787980 |
| C    | 3.18337586328931  | -0.88253417332177 | -7.00662283473267 |
| C    | 3.01075074546539  | -2.18262856515754 | -6.65888405884285 |
| H    | 1.01394944289365  | 0.82174769972724  | -1.33430251296665 |
| H    | -0.13435235784207 | -0.49885401335577 | -1.32644849712432 |
| H    | 3.37842996376655  | -3.61462958026361 | -0.52050524623874 |
| H    | 3.47602987746899  | -2.50736298388549 | 0.82741113678629  |
| H    | 4.01193030788478  | 3.90636840055104  | -6.35741504652871 |
| H    | 2.44595580968951  | 4.45829688031544  | -5.80106788522609 |
| H    | 3.08604422719915  | 2.54600980007613  | -1.54403218860898 |
| H    | 4.42140173956963  | 3.66961481499617  | -1.65199353252855 |
| H    | 6.83223252036511  | -0.83640248331932 | -4.26657434346427 |
| H    | 7.43648937648527  | -1.66823187303380 | -5.71565132246058 |
| H    | 4.37281151455931  | 0.92639319072716  | -7.01865873447084 |
| C    | 5.67811062418555  | -0.76701194056110 | -6.88838680624976 |
| H    | 2.29538127413937  | -0.29107950311449 | -7.20355898377293 |
| H    | 2.02871763875799  | -2.63139991203862 | -6.64508827625094 |
| H    | 3.84495608394115  | -2.85622514354295 | -6.48390377640134 |
| H    | 6.53918489434936  | -0.12972354310304 | -7.02471139376616 |
| H    | 5.78275551858719  | -1.76728862746553 | -7.28930550480398 |
| C    | 6.03451295142688  | -2.82553303781316 | -4.58353329822352 |
| C    | 5.54909029467346  | -3.09535910532925 | -3.34896519352863 |
| C    | 4.90008456668761  | -4.38955934370092 | -2.95950914800911 |
| H    | 5.91974121011244  | -3.59600435900557 | -5.34451037690453 |
| H    | 5.74478072705046  | -2.40040245928185 | -2.53317348831329 |
| C    | 5.70268396818077  | -5.12915120584419 | -1.87167239389490 |
| H    | 3.89196164670758  | -4.18986872544973 | -2.58679194669190 |
| H    | 4.78239926281669  | -5.01466238723849 | -3.84849948844427 |
| H    | 6.69758040556727  | -5.38983595314993 | -2.25330985334606 |
| H    | 5.85397322750673  | -4.45391965949317 | -1.02067475152341 |
| C    | 0.41044284269052  | 0.18913826299361  | 0.64238896797919  |

|   |                   |                   |                   |
|---|-------------------|-------------------|-------------------|
| C | 1.62115391138217  | 0.71841624602595  | 1.41324490881559  |
| C | 1.65308884833059  | -3.65501036873893 | 0.77190015813850  |
| C | 0.63502508999100  | -4.20430716519154 | -0.22941124956960 |
| C | 4.07324883902896  | 5.75584919042755  | -5.24086900454161 |
| C | 5.53338164967640  | 5.68970284711559  | -4.78764197035380 |
| C | 2.48616302509443  | 4.61900977800370  | -1.65943941477873 |
| C | 1.05622933800608  | 4.37055801087514  | -2.14236766832448 |
| C | -0.74374332343950 | 1.19506037185391  | 0.71779093322866  |
| C | 2.21927426832067  | -4.79624181690592 | 1.62499441893994  |
| C | 3.95070890427200  | 6.61995930632055  | -6.50175796715327 |
| C | 2.50234064295486  | 4.83057488798094  | -0.14120916438641 |
| H | 2.84776534044158  | 5.55060927434424  | -2.12811562405768 |
| H | 1.86034183008632  | 5.66843854439309  | 0.13574635825146  |
| H | 2.14669500620024  | 3.93351766820732  | 0.36932331018092  |
| H | 3.51818889977353  | 5.04162632469043  | 0.19679314423197  |
| H | 0.40556299472412  | 5.20076348163427  | -1.86337386696560 |
| H | 1.03958370135748  | 4.26878043830412  | -3.23444172531497 |
| H | 0.65615050318069  | 3.45334143620209  | -1.70320158599696 |
| H | 3.49115978004836  | 6.24683395832641  | -4.44334427633261 |
| H | 5.92611039622372  | 6.69233203757994  | -4.61101541383640 |
| H | 5.61173079752384  | 5.11937087676728  | -3.85389424859240 |
| H | 6.15211303555933  | 5.20264915381081  | -5.54548307572418 |
| H | 4.32955169719168  | 7.62592987375008  | -6.31336445705078 |
| H | 4.51955785191176  | 6.17844002295482  | -7.32221366168591 |
| H | 2.90466741864332  | 6.69210431026286  | -6.80408920651599 |
| H | 0.07402492323128  | -0.73971868757217 | 1.13411440364529  |
| H | 1.12521535666658  | -2.96367279753756 | 1.44993792590781  |
| H | 1.35875255563179  | 0.91618348646535  | 2.45372723916514  |
| H | 2.43235810884604  | -0.01981259351014 | 1.39554910035658  |
| H | 1.98738950922793  | 1.64545092770353  | 0.96571750937472  |
| H | -1.01779110137049 | 1.38520792368438  | 1.75693445868810  |
| H | -0.45422155968385 | 2.13969196222146  | 0.25345664270649  |
| H | -1.61617501546210 | 0.80326860898957  | 0.19234744824170  |
| H | -0.15862086971904 | -4.74619578170115 | 0.28745985301737  |
| H | 0.18004926797089  | -3.38110583500508 | -0.79366275170022 |
| H | 1.11669299092408  | -4.88480344789156 | -0.93601872634886 |
| H | 1.41994846326173  | -5.29705609772627 | 2.17388450209224  |
| H | 2.72032557107859  | -5.53014166698522 | 0.99092812239913  |
| H | 2.94339805851729  | -4.40500642541279 | 2.34145291060155  |
| C | 5.00743664077043  | -6.40092480205099 | -1.35449915185919 |
| C | 5.76892061030210  | -6.94307254795128 | -0.14059825033732 |
| H | 3.98996355120918  | -6.13413095497213 | -1.03051237349381 |
| C | 4.90292763598064  | -7.47812934823960 | -2.43813064155614 |
| H | 4.45145108356313  | -8.38079892548241 | -2.02446652062349 |
| H | 4.28171193449609  | -7.13695404311756 | -3.26668469178930 |
| H | 5.89141573717884  | -7.73182053749078 | -2.82527411357088 |

|   |                  |                   |                   |
|---|------------------|-------------------|-------------------|
| H | 5.26636452352531 | -7.82636116213619 | 0.25523074317335  |
| H | 6.78809986131026 | -7.21802826141831 | -0.41752698835429 |
| H | 5.81441387992924 | -6.18973693264224 | 0.64698396713792  |

## Stage 2

**Table S21: *i*-C<sub>4</sub>H<sub>9</sub>-T-AS-C-TS inclusion *cis*-C<sub>4</sub>H<sub>8</sub> in polymer. Transition state**

| Atom | x                 | y                 | z                 |
|------|-------------------|-------------------|-------------------|
| C    | 4.09478607046466  | 0.84252836644051  | -0.91544767225407 |
| Al   | 3.72200486864895  | -0.83398423779060 | -1.88529162136879 |
| Cl   | 1.53424702785888  | -0.63337538405656 | -2.65692898964828 |
| Nd   | 2.19329844736324  | -0.54311467835803 | -5.44294370958094 |
| C    | -0.59932076655001 | -1.61648205806787 | -5.52164682975721 |
| C    | -0.50213828243944 | -0.16896607787047 | -5.50608736295424 |
| C    | 3.97529181134210  | -2.71558051329352 | -1.33265926256285 |
| Cl   | 4.66006658586456  | -0.72145487949489 | -4.00103970733410 |
| Cl   | 2.44298396692515  | 2.25034008513194  | -4.68064427882213 |
| Al   | 4.01684548638775  | 2.79481734721496  | -6.26806037284720 |
| C    | 5.82256254717541  | 2.78781191599400  | -5.47077744511056 |
| Cl   | 3.85200818044263  | 0.73425430869161  | -7.36481345876146 |
| C    | 3.16538394145563  | 4.17544573867478  | -7.39793538351996 |
| C    | -0.07107709068197 | 0.59814913648291  | -6.54645086759504 |
| H    | 4.15568050931227  | 1.65207580480551  | -1.65474524049892 |
| H    | 3.22319762962948  | 1.07976009948715  | -0.28907711233915 |
| H    | 3.29051539031300  | -3.34452929213279 | -1.91903896520611 |
| H    | 4.98751586339117  | -3.03008199993235 | -1.62368160111449 |
| H    | 2.33245249500621  | 3.71744613408982  | -7.94824732827622 |
| H    | 2.70195600840030  | 4.91963329706610  | -6.73421888889100 |
| H    | 5.83391120705152  | 2.05311359425259  | -4.65531737631969 |
| H    | 6.52840859557783  | 2.40786915406636  | -6.22301212501272 |
| H    | -0.76852381935317 | -2.02041510911906 | -6.51446886028872 |
| H    | -1.31833215447227 | -1.98989278447272 | -4.80342661094693 |
| H    | -0.73344513522101 | 0.33538984202269  | -4.57123265032845 |
| H    | -0.02648027984905 | 1.67304047074703  | -6.41955534149774 |
| C    | 3.79852522679590  | -2.76012288066442 | -6.97518918576567 |
| H    | 4.60095029750510  | -2.51937586444829 | -6.28679334900277 |
| H    | 4.04358183695608  | -2.76767795985496 | -8.02760331544813 |
| C    | 2.56914805970472  | -3.12135961666901 | -6.54262184941302 |
| C    | 2.08290613275855  | -3.05018530316189 | -5.19280430954033 |
| H    | 1.82400875600252  | -3.35902185301708 | -7.30136722981851 |
| H    | 2.78847252941254  | -3.03576443031270 | -4.36788200226082 |
| C    | 0.68924969638769  | -3.10222165021947 | -4.92526122914228 |
| H    | 0.09305556443877  | -3.74952328261871 | -5.55631441138567 |
| H    | 0.41197579605637  | -3.13822931685404 | -3.88073623031611 |
| C    | 0.25228176267802  | 0.04814682231015  | -7.91008274848630 |
| C    | 0.54047554805921  | 1.13698078276325  | -8.94871961045082 |
| H    | 1.11659453348475  | -0.64800567672500 | -7.87722486990081 |
| H    | -0.56837700003889 | -0.59725091455547 | -8.24509700749770 |
| H    | -0.31397644795069 | 1.82324180262926  | -8.97652188065388 |
| H    | 1.41382441886882  | 1.71914938029645  | -8.63933924402834 |
| C    | 5.35148252892624  | 0.86375241281993  | -0.03399755150981 |

|   |                   |                   |                    |
|---|-------------------|-------------------|--------------------|
| C | 5.51060493637546  | 2.23603558047309  | 0.63165522373496   |
| C | 6.60666781189652  | 0.51925643602925  | -0.83811056658374  |
| C | 3.77708614643636  | -3.02194643992512 | 0.16019431453091   |
| C | 3.97376804393356  | -4.51888414399279 | 0.42890484014181   |
| C | 2.39547058333975  | -2.57787958868823 | 0.64560894149280   |
| C | 6.34074823471167  | 4.13478406252195  | -4.94908580808632  |
| C | 7.75431452462361  | 3.97470846710196  | -4.37706837217998  |
| C | 4.07585166126879  | 4.90998134225113  | -8.39346356506812  |
| C | 3.26105051826144  | 5.91900163199553  | -9.21200309357702  |
| C | 4.79469513312660  | 3.93520761165717  | -9.32843731419696  |
| C | 5.40693148986857  | 4.72128155159057  | -3.88868216664713  |
| H | 6.39863352968668  | 4.85110530025670  | -5.78661358633588  |
| H | 8.13487783312379  | 4.93465295622500  | -4.02397726659295  |
| H | 7.74799290573098  | 3.27130164884185  | -3.54231145980310  |
| H | 8.42785721095705  | 3.59362441652193  | -5.14638588004503  |
| H | 5.78786337402997  | 5.67754111684114  | -3.52673953488794  |
| H | 4.40954484331440  | 4.88494095099648  | -4.31492697089208  |
| H | 5.31443541648189  | 4.04007337044631  | -3.03900783924434  |
| H | 4.84221370308496  | 5.47335430169522  | -7.83523090851980  |
| H | 5.43745665424309  | 4.47538097090357  | -10.02543529632307 |
| H | 5.41841495241879  | 3.24590682720355  | -8.74684418257111  |
| H | 4.07424040707110  | 3.34947991837960  | -9.90443707708337  |
| H | 3.90825497784857  | 6.46558093925548  | -9.89998593243715  |
| H | 2.49025520116001  | 5.40468195270799  | -9.78938571460572  |
| H | 2.77574182181401  | 6.63449317416848  | -8.54618170119678  |
| H | 5.24453978700724  | 0.11420240185701  | 0.76849547723590   |
| H | 4.53531379593425  | -2.47518961619387 | 0.74529463764451   |
| H | 7.49114463412257  | 0.54154101940638  | -0.19949253280314  |
| H | 6.51453531581943  | -0.48667659113166 | -1.26601896988599  |
| H | 6.74911690620485  | 1.23255752712512  | -1.65374996805319  |
| H | 6.38538210810686  | 2.24521552466858  | 1.28410197339064   |
| H | 5.62949045845268  | 3.01384991405411  | -0.12503600055251  |
| H | 4.62703405953272  | 2.46584078056132  | 1.22941859662924   |
| H | 2.26974302530716  | -2.80422749631780 | 1.70565705684638   |
| H | 2.27832483442202  | -1.49601905649110 | 0.50767803082085   |
| H | 1.60691981092550  | -3.08717294269615 | 0.08581526086567   |
| H | 3.86608465053341  | -4.73395268453523 | 1.49341594143508   |
| H | 3.23602744862269  | -5.10408161514018 | -0.12354687151232  |
| H | 4.97062811594389  | -4.82749807542746 | 0.10978240327737   |
| C | 0.78092932587359  | 0.59634110697037  | -10.36846409771455 |
| C | 0.85907367766960  | 1.76993579490162  | -11.34973600626715 |
| C | 2.05513093442679  | -0.24912187617118 | -10.45349960318520 |
| H | -0.07519850809849 | -0.03477352724620 | -10.65000571482078 |
| H | 2.23005245613251  | -0.55834648723590 | -11.48457427942756 |
| H | 2.91922530939080  | 0.32314402478038  | -10.11084618327773 |
| H | 1.96872679533136  | -1.14744209936199 | -9.84083538315882  |



|   |                   |                  |                    |
|---|-------------------|------------------|--------------------|
| H | 1.01155862863593  | 1.40399727062105 | -12.36558897904995 |
| H | -0.06525366920524 | 2.34852404615577 | -11.32528865922438 |
| H | 1.68864822501018  | 2.43051032309219 | -11.09020139777620 |

**Stage 2****Table S23: *i*-C<sub>4</sub>H<sub>9</sub>-T-AS-T-TS inclusion *trans*-C<sub>4</sub>H<sub>8</sub> in polymer. Transition state**

| Atom | x            | y            | z            |
|------|--------------|--------------|--------------|
| C    | 0.760910000  | -0.049994000 | -0.596729000 |
| Al   | 2.235583000  | -1.311859000 | -0.952940000 |
| C    | 2.857227000  | -2.847684000 | 0.125589000  |
| Cl   | 4.141877000  | -0.091649000 | -1.464656000 |
| Nd   | 4.047010000  | -0.585823000 | -4.296831000 |
| C    | 6.574412000  | -1.358741000 | -4.614427000 |
| Cl   | 2.067077000  | 1.454870000  | -4.523466000 |
| Al   | 3.478175000  | 3.233865000  | -4.010784000 |
| C    | 3.379443000  | 4.440161000  | -5.570946000 |
| Cl   | 5.400956000  | 1.943555000  | -4.216548000 |
| Cl   | 1.912307000  | -2.059642000 | -3.133386000 |
| C    | 3.320782000  | 3.644299000  | -2.086943000 |
| C    | 4.556474000  | -0.445058000 | -6.769449000 |
| C    | 3.616790000  | -1.529449000 | -6.895994000 |
| C    | 2.276390000  | -1.452565000 | -6.734174000 |
| H    | 0.960325000  | 0.876425000  | -1.151012000 |
| H    | -0.161843000 | -0.461461000 | -1.029083000 |
| H    | 3.380958000  | -3.551372000 | -0.533574000 |
| H    | 3.613869000  | -2.490974000 | 0.838555000  |
| H    | 3.866330000  | 3.944839000  | -6.422417000 |
| H    | 2.324150000  | 4.552161000  | -5.857328000 |
| H    | 3.013487000  | 2.729823000  | -1.564621000 |
| H    | 4.325043000  | 3.877481000  | -1.705754000 |
| H    | 6.616268000  | -0.696589000 | -3.739999000 |
| H    | 7.553736000  | -1.357781000 | -5.075281000 |
| H    | 4.207526000  | 0.579417000  | -6.865106000 |
| C    | 5.921245000  | -0.698359000 | -6.518274000 |
| H    | 4.051910000  | -2.522949000 | -7.004087000 |
| H    | 1.659813000  | -2.339222000 | -6.774032000 |
| H    | 1.765617000  | -0.501997000 | -6.631917000 |
| H    | 6.602774000  | 0.139689000  | -6.565603000 |
| H    | 6.329178000  | -1.627018000 | -6.898833000 |
| C    | 6.021055000  | -2.685429000 | -4.356860000 |
| C    | 5.381643000  | -3.103062000 | -3.243862000 |
| C    | 4.748247000  | -4.451317000 | -3.080005000 |
| H    | 6.054063000  | -3.376059000 | -5.198348000 |
| H    | 5.401515000  | -2.478748000 | -2.351211000 |
| C    | 5.456167000  | -5.288295000 | -1.995887000 |
| H    | 3.697393000  | -4.321667000 | -2.803275000 |
| H    | 4.757846000  | -4.975105000 | -4.039389000 |
| H    | 6.496103000  | -5.476695000 | -2.289608000 |
| H    | 5.487724000  | -4.711547000 | -1.063563000 |
| C    | 0.505077000  | 0.287154000  | 0.879028000  |

|   |              |              |              |
|---|--------------|--------------|--------------|
| C | 1.763714000  | 0.828884000  | 1.559476000  |
| C | 1.771747000  | -3.608577000 | 0.901768000  |
| C | 0.685412000  | -4.143493000 | -0.033630000 |
| C | 3.987515000  | 5.839141000  | -5.386403000 |
| C | 5.455128000  | 5.763691000  | -4.959446000 |
| C | 2.372408000  | 4.789536000  | -1.710042000 |
| C | 0.946499000  | 4.516711000  | -2.192060000 |
| C | -0.640109000 | 1.298393000  | 1.005464000  |
| C | 2.392018000  | -4.760673000 | 1.701005000  |
| C | 3.856417000  | 6.650583000  | -6.680987000 |
| C | 2.384665000  | 5.012574000  | -0.193329000 |
| H | 2.721305000  | 5.722090000  | -2.186321000 |
| H | 1.732938000  | 5.845153000  | 0.076710000  |
| H | 2.039182000  | 4.115259000  | 0.323707000  |
| H | 3.397769000  | 5.238051000  | 0.143547000  |
| H | 0.283513000  | 5.338526000  | -1.917256000 |
| H | 0.932143000  | 4.410334000  | -3.283722000 |
| H | 0.559810000  | 3.595559000  | -1.749100000 |
| H | 3.430919000  | 6.374781000  | -4.599472000 |
| H | 5.870654000  | 6.765035000  | -4.835686000 |
| H | 5.541763000  | 5.233726000  | -4.002978000 |
| H | 6.048722000  | 5.231350000  | -5.706946000 |
| H | 4.259848000  | 7.655317000  | -6.544196000 |
| H | 4.399002000  | 6.161922000  | -7.492482000 |
| H | 2.806101000  | 6.732005000  | -6.965536000 |
| H | 0.199540000  | -0.629893000 | 1.411150000  |
| H | 1.293868000  | -2.924088000 | 1.622687000  |
| H | 1.566034000  | 1.058388000  | 2.607739000  |
| H | 2.566979000  | 0.082945000  | 1.514667000  |
| H | 2.108420000  | 1.739923000  | 1.064250000  |
| H | -0.845599000 | 1.513552000  | 2.055478000  |
| H | -0.380254000 | 2.231047000  | 0.501185000  |
| H | -1.545595000 | 0.897066000  | 0.547405000  |
| H | -0.077312000 | -4.681466000 | 0.531603000  |
| H | 0.201857000  | -3.313365000 | -0.562870000 |
| H | 1.113334000  | -4.824231000 | -0.773743000 |
| H | 1.628626000  | -5.272755000 | 2.289232000  |
| H | 2.856570000  | -5.482661000 | 1.027161000  |
| H | 3.156488000  | -4.377348000 | 2.378770000  |
| C | 4.757835000  | -6.629524000 | -1.707800000 |
| C | 5.383413000  | -7.278655000 | -0.469066000 |
| H | 3.696728000  | -6.430186000 | -1.495009000 |
| C | 4.840503000  | -7.584338000 | -2.902690000 |
| H | 4.377660000  | -8.539234000 | -2.650240000 |
| H | 4.318778000  | -7.172022000 | -3.766745000 |
| H | 5.880754000  | -7.766349000 | -3.178557000 |

|   |             |              |              |
|---|-------------|--------------|--------------|
| H | 4.871981000 | -8.212834000 | -0.234163000 |
| H | 6.439505000 | -7.494201000 | -0.640225000 |
| H | 5.300562000 | -6.613574000 | 0.391460000  |

## Stage 2

**Table S24: *i*-C<sub>4</sub>H<sub>9</sub>-CC-AS addition *cis*-C<sub>4</sub>H<sub>8</sub> chain in polymer.**

| Atom | x                 | y                 | z                 |
|------|-------------------|-------------------|-------------------|
| C    | 4.06637431906368  | 0.76512935070294  | -1.02191439354248 |
| Al   | 3.96493847953187  | -1.13308458578524 | -1.54486351432033 |
| Cl   | 1.85050363419640  | -1.40591579817867 | -2.51962433704807 |
| Nd   | 2.83114270319987  | -1.32318058796492 | -5.16028247097263 |
| C    | -0.49448231131992 | -2.11475649239467 | -6.83422872213119 |
| C    | -0.06438888387689 | -0.76512032821434 | -6.31274566046709 |
| C    | 4.38314862086375  | -2.78730776192735 | -0.55340018528696 |
| Cl   | 5.11738566151550  | -1.38134290416884 | -3.56712194078901 |
| Cl   | 2.78725558861957  | 1.49623196388039  | -4.61554522386077 |
| Al   | 4.24808113721434  | 2.06020697447789  | -6.31889561856361 |
| C    | 6.05128786925020  | 2.26259934935215  | -5.54617444877578 |
| Cl   | 4.24506347369524  | -0.09836908917684 | -7.27069676756983 |
| C    | 3.22586948509145  | 3.25139034141717  | -7.51857631339298 |
| C    | 0.48673640726026  | 0.21209738470662  | -7.04737418308257 |
| H    | 4.16153951488821  | 1.35610417811009  | -1.94151779546649 |
| H    | 3.10595365579519  | 1.06036571667195  | -0.57714252913196 |
| H    | 3.85114349678373  | -3.61943322196873 | -1.03487644583469 |
| H    | 5.45262288716002  | -3.00536641934275 | -0.68170422224155 |
| H    | 2.57800647449311  | 2.64617053827786  | -8.16463332714221 |
| H    | 2.54797289163089  | 3.85348752186738  | -6.89719007238035 |
| H    | 6.11098746740352  | 1.61033539120807  | -4.66476387782426 |
| H    | 6.78949547312784  | 1.86913626721072  | -6.25863730683204 |
| H    | -0.91302511239607 | -2.01913300234413 | -7.83789739805139 |
| H    | -1.28948114555286 | -2.51194564251489 | -6.19814356447423 |
| H    | -0.24302144538732 | -0.56609757895754 | -5.25615718186512 |
| H    | 0.74195362210242  | 1.14203385286041  | -6.54756834565790 |
| C    | 3.60002398733245  | -3.76935983426466 | -5.97236029178843 |
| H    | 3.54693257500369  | -3.56704222904836 | -7.03954536739419 |
| H    | 4.55061677102260  | -4.14535249265779 | -5.61979196869859 |
| C    | 2.45050460567756  | -3.96965764269107 | -5.21531704481163 |
| C    | 1.19256041838766  | -3.42814273875769 | -5.46768378699136 |
| H    | 2.60249558487338  | -4.35764832697299 | -4.20821552817009 |
| H    | 0.42583109428142  | -3.59468881870110 | -4.71815828244073 |
| C    | 0.67430672488706  | -3.11446842587631 | -6.85637202897908 |
| H    | 1.46108885079102  | -2.70788963702789 | -7.50847254950742 |
| H    | 0.35784177718676  | -4.04065224623420 | -7.35392313204481 |
| C    | 0.73498670404889  | 0.19508800139148  | -8.52608114719813 |
| C    | -0.06492285690371 | 1.30402603102525  | -9.24026344744614 |
| H    | 1.80304284426708  | 0.35056475535259  | -8.69722542122175 |
| H    | 0.48899928736614  | -0.77854282739501 | -8.95306801401041 |
| H    | -1.12721102062633 | 1.20002923058032  | -8.98910132731289 |
| H    | 0.25435871726682  | 2.28732429823132  | -8.87399208929793 |
| C    | 5.19461890131315  | 1.14508756025214  | -0.05468692579387 |

|   |                   |                   |                    |
|---|-------------------|-------------------|--------------------|
| C | 5.17190633201364  | 2.65434855281389  | 0.21547907990195   |
| C | 6.56438214347226  | 0.72947574387675  | -0.59478053849457  |
| C | 4.05878669924491  | -2.78290690948297 | 0.94721808492126   |
| C | 4.40616045259269  | -4.14205273589607 | 1.56696796757864   |
| C | 2.58802681400353  | -2.44674667176339 | 1.20213100258675   |
| C | 6.46316799804458  | 3.68691689099193  | -5.15013898209899  |
| C | 7.86316460926523  | 3.67874570594410  | -4.52464976533689  |
| C | 4.05767290013220  | 4.19698960536967  | -8.39602812894094  |
| C | 3.13863945135355  | 5.10994023973943  | -9.21619786702925  |
| C | 4.99469213474320  | 3.41921204919478  | -9.32193588064588  |
| C | 5.45906188069251  | 4.31768625167893  | -4.18362752307540  |
| H | 6.50673482562502  | 4.31663002982829  | -6.05482964405551  |
| H | 8.17149580145872  | 4.69340295525416  | -4.26720472421570  |
| H | 7.87074674953727  | 3.06905330296120  | -3.61919539570448  |
| H | 8.58490456505785  | 3.26254706485998  | -5.22924837217774  |
| H | 5.76412173776601  | 5.33169643316539  | -3.92040513436918  |
| H | 4.46650368241308  | 4.36517847832174  | -4.64850121122840  |
| H | 5.38445300703966  | 3.72901279273369  | -3.26602540640928  |
| H | 4.67541443042469  | 4.84378348478858  | -7.75032420900133  |
| H | 5.58993737001230  | 4.10302500127653  | -9.92899755843888  |
| H | 5.67822986158596  | 2.79834653782841  | -8.72999108913315  |
| H | 4.42577444849411  | 2.76751694422164  | -9.98888011593204  |
| H | 3.72752049069691  | 5.79834550133461  | -9.82451374646766  |
| H | 2.50293132598470  | 4.51596704501950  | -9.87551091384938  |
| H | 2.49852629567946  | 5.69150320024450  | -8.55076885494726  |
| H | 5.03609227685295  | 0.63036905088675  | 0.90824828829613   |
| H | 4.67567892839186  | -2.01945265616808 | 1.44951062011248   |
| H | 7.35417170532289  | 1.00889626562725  | 0.10418936174910   |
| H | 6.59859306209634  | -0.35759849121026 | -0.73828158441835  |
| H | 6.76357129423522  | 1.21276958261372  | -1.55443693518051  |
| H | 5.94403667162546  | 2.92418575056154  | 0.93782066625362   |
| H | 5.34923857896773  | 3.20652648216328  | -0.70946970997697  |
| H | 4.20037910081334  | 2.94889412815641  | 0.61528973387561   |
| H | 2.37275747611170  | -2.45162346168919 | 2.27172385121015   |
| H | 2.35759617878022  | -1.44918511997963 | 0.80785953994358   |
| H | 1.93496519365988  | -3.17351995932696 | 0.71253382210220   |
| H | 4.20868963026092  | -4.13360114609822 | 2.64012252643265   |
| H | 3.81110360363701  | -4.93287430855034 | 1.10639352721361   |
| H | 5.46244081101261  | -4.36522256063219 | 1.40802737316449   |
| C | 0.07614633057115  | 1.26688582700663  | -10.77263232979903 |
| C | -0.86941030330425 | 2.29938783322633  | -11.39552339840011 |
| C | 1.51427819773637  | 1.52893331133290  | -11.22765372455613 |
| H | -0.22279798434195 | 0.26791730759816  | -11.12382028404894 |
| H | 1.56464102860660  | 1.54460924188585  | -12.31707735456443 |
| H | 1.86411612544121  | 2.49257711356467  | -10.85306259838123 |
| H | 2.18631475228945  | 0.74900059150396  | -10.86811648006225 |

|   |                   |                  |                    |
|---|-------------------|------------------|--------------------|
| H | -0.80305802907634 | 2.26428333632111 | -12.48355567492354 |
| H | -1.90101028327924 | 2.09527145725103 | -11.10549649672019 |
| H | -0.60863959427522 | 3.30616110163935 | -11.06430750894474 |

## Stage 2

**Table S25: *i*-C<sub>4</sub>H<sub>9</sub>-TC-AS addition *cis*-C<sub>4</sub>H<sub>8</sub> chain in polymer.**

| Atom | x                 | y                 | z                 |
|------|-------------------|-------------------|-------------------|
| C    | 0.20792054958550  | -0.39146895529367 | -0.72735290312212 |
| Al   | 1.55861718929393  | -1.72622800148938 | -1.26417908247630 |
| C    | 2.12294634707025  | -3.41030074261556 | -0.39459491285211 |
| Cl   | 3.51840873181653  | -0.59455170833645 | -1.75667377810624 |
| Nd   | 3.25699997272118  | -0.74269408285126 | -4.62517363913996 |
| C    | 6.20167086666735  | -1.78070810159628 | -6.21566126077825 |
| Cl   | 1.82422737740425  | 1.62381121875130  | -4.56136804150578 |
| Al   | 3.65760527603887  | 2.97256158685308  | -3.90855630465723 |
| C    | 3.83155445500213  | 4.30647491340012  | -5.35189456639225 |
| Cl   | 5.24457395623531  | 1.31204065235048  | -4.27065176261817 |
| Cl   | 1.12771653629970  | -2.21164801871139 | -3.49781273565896 |
| C    | 3.54140759149209  | 3.21142297596763  | -1.95494952614724 |
| C    | 4.14892748381120  | -0.47101004066853 | -7.24343207796004 |
| C    | 2.80073685455704  | -0.79549069372135 | -7.25059538835345 |
| C    | 2.22393091634294  | -1.95481774469911 | -6.72211365803565 |
| H    | 0.47965294742360  | 0.56202338541153  | -1.20033548694829 |
| H    | -0.76129709019857 | -0.67412616206142 | -1.16122966394631 |
| H    | 2.53239873044991  | -4.07146793946740 | -1.16970420498632 |
| H    | 2.96002456584895  | -3.18508077603068 | 0.28108883940095  |
| H    | 4.24298097486721  | 3.80886294064494  | -6.24050417699317 |
| H    | 2.82804473565961  | 4.65000987316689  | -5.63894889694943 |
| H    | 3.08283253357651  | 2.31004138484277  | -1.53031809204312 |
| H    | 4.56296839102309  | 3.24062317104573  | -1.55019965908682 |
| H    | 6.53649387090386  | -0.85141844507792 | -5.74856111657235 |
| H    | 7.09962563516827  | -2.27278301917606 | -6.60813241165790 |
| H    | 4.40621802010056  | 0.54885519370676  | -7.50604847448140 |
| C    | 5.26962590507155  | -1.48622691454704 | -7.41510508578599 |
| H    | 2.11490322755119  | 0.02978326766367  | -7.44446343940988 |
| H    | 1.15403287485864  | -2.10145379382843 | -6.77953856972005 |
| H    | 2.81038264531303  | -2.87080606910172 | -6.63899451185327 |
| H    | 5.90193675061465  | -1.12513713101862 | -8.23106164146923 |
| H    | 4.84748696398128  | -2.43621903267031 | -7.75835884020482 |
| C    | 5.61041753179950  | -2.71181069130716 | -5.19313593742338 |
| C    | 5.67919505068623  | -2.58951706792953 | -3.86138883037190 |
| C    | 5.20648943124118  | -3.61285597992191 | -2.86982220740818 |
| H    | 5.14316677681001  | -3.60934899805983 | -5.59830172043734 |
| H    | 6.17100875945277  | -1.71175258800547 | -3.43986258828389 |
| C    | 6.35291053861528  | -4.08213874308310 | -1.95194801576790 |
| H    | 4.42572197054169  | -3.17686060803952 | -2.24265000324061 |
| H    | 4.75836816509537  | -4.45717154853472 | -3.39911853581790 |
| H    | 7.12687142980799  | -4.58688398624020 | -2.54277386777497 |
| H    | 6.82265422876894  | -3.20288290138009 | -1.49401586638074 |
| C    | 0.02659538971443  | -0.17073096205626 | 0.78034718946898  |



|   |                   |                   |                   |
|---|-------------------|-------------------|-------------------|
| C | 1.35182455515446  | 0.17113283873600  | 1.46416853610789  |
| C | 1.05195315617251  | -4.17933140331835 | 0.39055815816967  |
| C | -0.14393643565934 | -4.53132764959514 | -0.49650741336546 |
| C | 4.69191069765931  | 5.53360398340742  | -5.01497270737333 |
| C | 6.09906872923408  | 5.12931652596301  | -4.56981457911027 |
| C | 2.78367564760134  | 4.45051709637629  | -1.46199485607994 |
| C | 1.34919999419838  | 4.48453127744044  | -1.99267811583102 |
| C | -0.99769409461354 | 0.94228880068175  | 1.03226305761294  |
| C | 1.65329269197684  | -5.45418879593884 | 0.99554447653434  |
| C | 4.77084080262570  | 6.47493204516180  | -6.22291926211789 |
| C | 2.78224149276249  | 4.49495417040570  | 0.07087561220661  |
| H | 3.30027998221887  | 5.35782995245928  | -1.81946894476839 |
| H | 2.25586830704394  | 5.38276186244478  | 0.42531183731508  |
| H | 2.29047439774504  | 3.60990893696308  | 0.47951029802149  |
| H | 3.80702292519207  | 4.52427613967032  | 0.44473657121287  |
| H | 0.82788307800190  | 5.37252160329984  | -1.63181469641354 |
| H | 1.35536162836063  | 4.50969000001205  | -3.08914230637251 |
| H | 0.79410385820451  | 3.60072418209265  | -1.66846833062879 |
| H | 4.22011085503454  | 6.09065427151833  | -4.18848341326244 |
| H | 6.69643691082467  | 6.01222423229482  | -4.33682565805578 |
| H | 6.04365387009221  | 4.50343995301213  | -3.67043493691052 |
| H | 6.60614714262843  | 4.56399580994794  | -5.35573857085981 |
| H | 5.35085261396518  | 7.36540778018765  | -5.97487455941663 |
| H | 5.24497846054890  | 5.97082469905646  | -7.06710974233922 |
| H | 3.76777479498607  | 6.78371693547930  | -6.52149602720194 |
| H | -0.36448993252567 | -1.09537732093101 | 1.23734320223398  |
| H | 0.68993705504146  | -3.55336767522272 | 1.22301188726036  |
| H | 1.20417519417746  | 0.32235930396561  | 2.53461468441954  |
| H | 2.06884741364508  | -0.64772131898086 | 1.32695597134559  |
| H | 1.78156988880622  | 1.08268445315308  | 1.04154600385856  |
| H | -1.16356791070049 | 1.07241967851168  | 2.10293722625127  |
| H | -0.64131967931129 | 1.88606554457220  | 0.61502844769866  |
| H | -1.94810340737636 | 0.68994760270082  | 0.55944575435052  |
| H | -0.89771477387125 | -5.07689951557514 | 0.07323921336423  |
| H | -0.60295943809115 | -3.61594517009821 | -0.88956638478681 |
| H | 0.17088039527576  | -5.15159550944800 | -1.33946510391224 |
| H | 0.90358418300618  | -5.99028806116197 | 1.57980411553461  |
| H | 2.01952315593641  | -6.11286212237886 | 0.20577873945922  |
| H | 2.48863837362298  | -5.19923464938314 | 1.64975182227100  |
| C | 5.87906933788728  | -5.01632731952039 | -0.82466565203622 |
| C | 7.00132483577936  | -5.20053391495752 | 0.20137468161666  |
| H | 5.02516512445149  | -4.54102079208732 | -0.31734250682339 |
| C | 5.42596708110967  | -6.37617864758096 | -1.36376940892985 |
| H | 5.12119767908743  | -7.02190106515779 | -0.53914370525193 |
| H | 4.57730028966946  | -6.26364364216521 | -2.03926800487667 |
| H | 6.23799676360699  | -6.86566028919467 | -1.90452327978604 |

|   |                  |                   |                   |
|---|------------------|-------------------|-------------------|
| H | 6.66521688365586 | -5.84435107501690 | 1.01510667817790  |
| H | 7.87663070535345 | -5.65740643736164 | -0.26367012238490 |
| H | 7.29420623571903 | -4.23757018672424 | 0.62177269882201  |

## Stage 2

**Table S26: *i*-C<sub>4</sub>H<sub>9</sub>-CT-AS addition *trans*-C<sub>4</sub>H<sub>8</sub> chain in polymer.**

| Atom | x                 | y                 | z                 |
|------|-------------------|-------------------|-------------------|
| C    | 3.97597236374574  | 0.72578554601129  | -0.76024763761256 |
| Al   | 3.98963063876477  | -1.11915413725021 | -1.45304770841887 |
| Cl   | 1.84660316271261  | -1.36264363896913 | -2.42299048698118 |
| Nd   | 2.79132851828152  | -1.13211725054951 | -5.05304430886187 |
| C    | -0.99053218878645 | -1.61204312843385 | -6.12843376743404 |
| C    | -0.13286625584611 | -0.37051723003139 | -6.00998619023256 |
| C    | 4.47354991476737  | -2.84077967353687 | -0.61973477442200 |
| Cl   | 5.12362318989402  | -1.14694776276216 | -3.48222367587458 |
| Cl   | 2.75140689130232  | 1.70407116158076  | -4.52987090035961 |
| Al   | 4.24213953120895  | 2.21730243316406  | -6.22184743019305 |
| C    | 6.03815496981700  | 2.37835488259004  | -5.42622890734111 |
| Cl   | 4.19387665563690  | 0.04895849698034  | -7.17203642391986 |
| C    | 3.26305051054563  | 3.39554302509028  | -7.46732941860173 |
| C    | 0.50604873361463  | 0.26373690481886  | -7.00275863807316 |
| H    | 3.97741680972925  | 1.40024496593474  | -1.62694046769391 |
| H    | 3.01996238722389  | 0.90103149848099  | -0.24766863819677 |
| H    | 3.98146546062599  | -3.64544971859410 | -1.18314869672809 |
| H    | 5.55171666171873  | -2.99335681312491 | -0.76950773979562 |
| H    | 2.58253081669852  | 2.78175784633478  | -8.07098694187077 |
| H    | 2.61875297245570  | 4.06381106417139  | -6.87908905195591 |
| H    | 6.05909900851391  | 1.74517480385107  | -4.52939026885584 |
| H    | 6.77660770445207  | 1.94584018592464  | -6.11508974130402 |
| H    | -1.79278431461073 | -1.44245900592753 | -6.85399930507339 |
| H    | -1.47952390582905 | -1.78446980092532 | -5.16689614216194 |
| H    | -0.08517500305744 | 0.09050800983752  | -5.02261616708012 |
| H    | 1.04403142992446  | 1.17477122402635  | -6.75373396313771 |
| C    | 3.40331178575214  | -3.63842177769916 | -5.41076847147488 |
| H    | 3.34621308777866  | -3.87544348344129 | -4.34857391157935 |
| H    | 4.32929016927043  | -3.91992177872668 | -5.89482824773758 |
| C    | 2.22364737624332  | -3.53497556426329 | -6.15785821547459 |
| C    | 1.00232253222643  | -3.11618165757130 | -5.66418484378425 |
| H    | 2.32921204412622  | -3.54600448057617 | -7.24429745173619 |
| H    | 0.81448476572154  | -3.23186785630482 | -4.59404746363539 |
| C    | -0.21218070256111 | -2.88358608445949 | -6.52234195258598 |
| H    | 0.09989864892385  | -2.81715996229121 | -7.56698824163667 |
| H    | -0.90161418628397 | -3.73472800475218 | -6.46299456409001 |
| C    | 0.52795669217526  | -0.10581165598570 | -8.45538012195902 |
| C    | 0.13128820352344  | 1.08053090558936  | -9.35542782826254 |
| H    | 1.54309150951601  | -0.43068714573940 | -8.70933143756747 |
| H    | -0.13046578420061 | -0.95248037986937 | -8.65258885968511 |
| H    | -0.90547803096818 | 1.36198589459448  | -9.13598891092861 |
| H    | 0.75047142268324  | 1.95515103949704  | -9.12412166980905 |
| C    | 5.11976592003620  | 1.11034422531371  | 0.18710411440250  |

|   |                   |                   |                    |
|---|-------------------|-------------------|--------------------|
| C | 5.00790605690381  | 2.58991113997667  | 0.57446887561418   |
| C | 6.48857039310114  | 0.83236306210021  | -0.43704346030978  |
| C | 4.15570340681023  | -3.00322511545261 | 0.87308457201124   |
| C | 4.59623055881666  | -4.38988176402532 | 1.35831952425150   |
| C | 2.66647653494932  | -2.79363388354151 | 1.15431795178807   |
| C | 6.48318355118576  | 3.79914487923382  | -5.05486317089310  |
| C | 7.85818468616178  | 3.76396412635524  | -4.37721262292170  |
| C | 4.12077782032709  | 4.24497491659923  | -8.41557089415701  |
| C | 3.22208631957578  | 5.10715518369479  | -9.31054103334595  |
| C | 5.03563134891609  | 3.37066483283677  | -9.27528100106741  |
| C | 5.46569033100219  | 4.48868885241005  | -4.14365906569188  |
| H | 6.57996600374587  | 4.40076079005191  | -5.97437830386849  |
| H | 8.20033520311346  | 4.77689212061545  | -4.15857445819572  |
| H | 7.80601181893477  | 3.20220941602165  | -3.44272070579334  |
| H | 8.58608995499935  | 3.28287047463130  | -5.03230955485914  |
| H | 5.79720665861130  | 5.49703778608580  | -3.89103109501446  |
| H | 4.49538739460171  | 4.56128671549470  | -4.65079856207601  |
| H | 5.33186369267055  | 3.92488952479497  | -3.21700356756184  |
| H | 4.75461439413746  | 4.92645100486344  | -7.82401657398641  |
| H | 5.63526331952438  | 3.98663432104397  | -9.94723874854436  |
| H | 5.71535672908060  | 2.79370546541995  | -8.63651182864538  |
| H | 4.44829444841681  | 2.67191327987292  | -9.87573961429471  |
| H | 3.82650116555544  | 5.73142097193937  | -9.97067906952530  |
| H | 2.57550619392177  | 4.47406925378827  | -9.92104837107424  |
| H | 2.59362704468494  | 5.75424851675030  | -8.69648906484223  |
| H | 5.03897177667425  | 0.51506627061786  | 1.11231998103994   |
| H | 4.72188148144569  | -2.25281069408234 | 1.44939022954705   |
| H | 7.28830085280831  | 1.12240592285074  | 0.24614934488702   |
| H | 6.59197413477549  | -0.23782602518496 | -0.65557133480873  |
| H | 6.60879190214595  | 1.39067128200337  | -1.36885227121328  |
| H | 5.79096274445178  | 2.85804450781356  | 1.28557095920439   |
| H | 5.10661063347056  | 3.22135136697603  | -0.31050465206316  |
| H | 4.03730798619749  | 2.78391992142962  | 1.03362326837099   |
| H | 2.45564173448343  | -2.91313307113010 | 2.21809733587331   |
| H | 2.36709830732849  | -1.78208804761710 | 0.85362701114077   |
| H | 2.06332417966939  | -3.51477100783325 | 0.59711309516779   |
| H | 4.39876673405288  | -4.50110840013725 | 2.42572668883339   |
| H | 4.05703261854280  | -5.17029974975281 | 0.81807573564924   |
| H | 5.66536026350862  | -4.52338808721811 | 1.18526434042236   |
| C | 0.25663073872959  | 0.76353162044564  | -10.85696408903036 |
| C | -0.50331503921767 | 1.81214958634003  | -11.67553290668801 |
| C | 1.72164112617660  | 0.71279057235634  | -11.30140745834662 |
| H | -0.20097649078764 | -0.21906645867430 | -11.04551077409712 |
| H | 1.78528714610890  | 0.42514722636180  | -12.35156004682582 |
| H | 2.18740548001963  | 1.69317027151819  | -11.18432515034710 |
| H | 2.28459712649464  | -0.01331560630892 | -10.71389019555095 |

|   |                   |                  |                    |
|---|-------------------|------------------|--------------------|
| H | -0.41951399824570 | 1.59142803913293 | -12.74038224386548 |
| H | -1.56004632863799 | 1.81380363912741 | -11.40510956471713 |
| H | -0.09654580141116 | 2.80862090839770 | -11.49454076185349 |

## Stage 2

**Table S27: *i*-C<sub>4</sub>H<sub>9</sub>-TT-AS addition *trans*-C<sub>4</sub>H<sub>8</sub> chain in polymer.**

| Atom | x                 | y                 | z                 |
|------|-------------------|-------------------|-------------------|
| C    | 0.02795535075656  | -0.69344434747133 | -1.29776908818638 |
| Al   | 1.61763523238158  | -1.86469310659934 | -1.30784026689176 |
| C    | 2.24494640867371  | -3.26561867082856 | -0.07109611091627 |
| Cl   | 3.44669800725322  | -0.53201555387967 | -1.76305235748331 |
| Nd   | 2.93025436765247  | -0.56386985581945 | -4.59904481362334 |
| C    | 5.88618856914294  | -1.58584533787083 | -6.61316028439814 |
| Cl   | 1.65378441105693  | 1.87940357071997  | -4.12380200273818 |
| Al   | 3.60876379270059  | 3.12440183775202  | -3.75562304993061 |
| C    | 3.57880022325374  | 4.52569634095239  | -5.14483595104371 |
| Cl   | 5.00659592606377  | 1.41079065182722  | -4.49843716872335 |
| Cl   | 1.55281599104685  | -2.74122984319296 | -3.48627924564560 |
| C    | 3.90902506717338  | 3.26552238577259  | -1.81195193692182 |
| C    | 3.56775450022469  | -0.69668709245320 | -7.19329385130104 |
| C    | 2.34030820855426  | -1.34020992071198 | -7.12418329775860 |
| C    | 1.18509216980978  | -0.80995264549032 | -6.55072376557662 |
| H    | 0.23785163851082  | 0.13572110697172  | -1.98885072749857 |
| H    | -0.81458866385211 | -1.24275597636452 | -1.74063757282388 |
| H    | 2.92517906389852  | -3.92601066019840 | -0.62457336656832 |
| H    | 2.86002410027210  | -2.79047047528115 | 0.70594336615159  |
| H    | 3.77912870089519  | 4.05851521911467  | -6.11857314788338 |
| H    | 2.55990155562775  | 4.93176387104950  | -5.21230815347115 |
| H    | 3.45581730056770  | 2.39134915503565  | -1.32912463622838 |
| H    | 4.98890967680451  | 3.17940724668193  | -1.62555261188735 |
| H    | 6.20432579362968  | -0.63466071611077 | -6.17987409382641 |
| H    | 6.77747863032947  | -2.04093740784176 | -7.06300550994462 |
| H    | 3.57328315187631  | 0.39681053529308  | -7.17459066988939 |
| C    | 4.83029085086130  | -1.34991281631780 | -7.70895099215327 |
| H    | 2.34829720079055  | -2.41557173453647 | -7.30583388232617 |
| H    | 0.29430036946162  | -1.41677786110210 | -6.46657766860850 |
| H    | 1.01586674657489  | 0.26599707091344  | -6.57535603532762 |
| H    | 5.27346802266155  | -0.74583856700959 | -8.50596896082780 |
| H    | 4.57626969328348  | -2.31470715880886 | -8.16035940957714 |
| C    | 5.37785188540251  | -2.50671704747685 | -5.53802947034033 |
| C    | 5.54753381854574  | -2.37471541674433 | -4.21601811107406 |
| C    | 5.17118672393007  | -3.40984035705469 | -3.19376372706595 |
| H    | 4.87738392616349  | -3.40732165715343 | -5.89438228261964 |
| H    | 6.07144852230982  | -1.49641363739185 | -3.83794437232400 |
| C    | 6.40145501659342  | -3.93599560880582 | -2.43003339737262 |
| H    | 4.47858425075202  | -2.97583166948207 | -2.47071494864155 |
| H    | 4.63918845333309  | -4.22760690112066 | -3.68468437817128 |
| H    | 7.07048026425691  | -4.47181410550092 | -3.11434623783340 |
| H    | 6.96757064207745  | -3.08488642566039 | -2.03161818284214 |
| C    | -0.42051108026533 | -0.11085813873581 | 0.04903449009133  |

|   |                   |                   |                   |
|---|-------------------|-------------------|-------------------|
| C | 0.73070962867970  | 0.58795791160042  | 0.77440817261304  |
| C | 1.16400156969436  | -4.12165680062994 | 0.60350373353807  |
| C | 0.25225550303908  | -4.78823663436907 | -0.42897122770957 |
| C | 4.55829972663267  | 5.68918298434162  | -4.93148633069099 |
| C | 6.00073214509568  | 5.19369980130127  | -4.80681530605643 |
| C | 3.39608544517076  | 4.54328425713871  | -1.13632749239870 |
| C | 1.89454207827338  | 4.73724061817280  | -1.35751134683748 |
| C | -1.57975380307664 | 0.87040570103133  | -0.16417431422482 |
| C | 1.81545622758878  | -5.18472462289534 | 1.49635432465187  |
| C | 4.44527323504261  | 6.69738337119785  | -6.08158384158090 |
| C | 3.70745690636951  | 4.50715734190883  | 0.36497319519414  |
| H | 3.91817423015290  | 5.41596128327322  | -1.56435898972014 |
| H | 3.35921807577622  | 5.42138085035491  | 0.84841885395423  |
| H | 3.21580222054555  | 3.65259770042951  | 0.83361734642633  |
| H | 4.78357975842408  | 4.41719779860723  | 0.52130202032352  |
| H | 1.55534621103476  | 5.66184716929540  | -0.88764362238041 |
| H | 1.67627018660542  | 4.79474724345690  | -2.43099779472261 |
| H | 1.32798986306724  | 3.90559189125197  | -0.93149806008083 |
| H | 4.29706554974734  | 6.21684670923883  | -3.99918965277424 |
| H | 6.68199051228281  | 6.03163475535687  | -4.65073771010908 |
| H | 6.09186930675754  | 4.51090971087374  | -3.95290054464726 |
| H | 6.30620883307778  | 4.66116835107368  | -5.71092311928584 |
| H | 5.11550825584129  | 7.54213102793537  | -5.91421044676692 |
| H | 4.70726642279415  | 6.22352293306056  | -7.02939276774300 |
| H | 3.42258214049719  | 7.07142229527070  | -6.15105827234358 |
| H | -0.78531112459699 | -0.92805303481386 | 0.69387595247350  |
| H | 0.53958618175757  | -3.47976818878688 | 1.24695643531163  |
| H | 0.39317305869981  | 0.99756370757897  | 1.72761720766218  |
| H | 1.54098227135582  | -0.12495409734771 | 0.97128084890111  |
| H | 1.12663484177373  | 1.40521566921879  | 0.16616475244638  |
| H | -1.92368681055264 | 1.26917751389418  | 0.79155553802609  |
| H | -1.25960460209935 | 1.70080815949450  | -0.79685908898881 |
| H | -2.41368426477189 | 0.36374252442020  | -0.65237205414766 |
| H | -0.50236258734725 | -5.40231568239445 | 0.06493465695797  |
| H | -0.26103692711178 | -4.02408845224184 | -1.02543363963756 |
| H | 0.83172100258328  | -5.42461325739228 | -1.10261645781643 |
| H | 1.05237789925310  | -5.78142920500280 | 1.99877313566640  |
| H | 2.44369830594354  | -5.84872937067452 | 0.89954233050857  |
| H | 2.43892041061030  | -4.70564472110821 | 2.25302749673274  |
| C | 6.02802511525414  | -4.85609270028623 | -1.25390473235659 |
| C | 7.27418678077859  | -5.15469340407030 | -0.41514333951065 |
| H | 5.30385508503693  | -4.32376712943057 | -0.61654295261503 |
| C | 5.38350518794389  | -6.16164208736377 | -1.72952854391658 |
| H | 5.16610118199316  | -6.80335068915736 | -0.87459841269000 |
| H | 4.44691850227595  | -5.96469561392002 | -2.25275369153056 |
| H | 6.05273181846217  | -6.69825360650843 | -2.40439265852840 |

|   |                  |                   |                   |
|---|------------------|-------------------|-------------------|
| H | 7.01419935389341 | -5.78806212805906 | 0.43384697578605  |
| H | 8.02571260757328 | -5.67046673287042 | -1.01548848513401 |
| H | 7.70803392013880 | -4.22876345252335 | -0.03543047220451 |



**Stage 3****Table S28: *i*-C<sub>4</sub>H<sub>9</sub>-CC-AS-T**

| Atom | x                | y                 | z                 |
|------|------------------|-------------------|-------------------|
| C    | 1.53110146460266 | 1.13417899958827  | -1.32225494807129 |
| Al   | 2.02554218439264 | -0.73651749967040 | -1.70825119112578 |
| Cl   | 1.49752339780235 | -1.06507173248139 | -3.95852201117198 |
| Nd   | 4.12282954261563 | -0.63236141136481 | -4.97954510345417 |
| C    | 2.78220382411962 | -0.71176871368194 | -7.20347832759209 |
| C    | 4.04330573156516 | -0.26098347147836 | -7.62694121267766 |
| C    | 5.23918544218601 | -0.94407252866855 | -7.52524036558388 |
| C    | 5.40905414489927 | -2.44610148571251 | -7.59639418648226 |
| C    | 6.37420448786059 | -3.04634273328223 | -6.55028930871523 |
| C    | 1.60347579367066 | -2.36351572472417 | -0.66840445475821 |
| Cl   | 4.31207197946914 | -0.83584803557227 | -2.10773330893613 |
| Cl   | 3.53342676781066 | 2.03814335868937  | -4.72452240030656 |
| Al   | 5.70092255666049 | 2.72492311979209  | -4.10415853266581 |
| C    | 5.77532933372353 | 2.80491648576389  | -2.13472698216384 |
| Cl   | 6.62995852393539 | 0.68941421121617  | -4.73570780284268 |
| C    | 6.19702263165759 | 4.06313428564252  | -5.46690634275612 |
| H    | 2.28185525473113 | 1.79335587043344  | -1.77688840636395 |
| H    | 0.58846157504712 | 1.35668042234240  | -1.84184648663513 |
| H    | 1.67782579163562 | -3.25069423993629 | -1.30835767762992 |
| H    | 2.38815059816345 | -2.48237090970596 | 0.09272143874753  |
| H    | 6.40007977126885 | 3.53835530750142  | -6.41048172397590 |
| H    | 5.32614039787521 | 4.70352630516417  | -5.66499223814618 |
| H    | 4.97483235527677 | 2.17794595725968  | -1.72285080007533 |
| H    | 6.71347038734154 | 2.33624083206848  | -1.80732175725383 |
| H    | 7.28056672030006 | -2.43712771897049 | -6.46846737722941 |
| H    | 6.68081232121022 | -4.04827498719777 | -6.87439901813282 |
| H    | 6.14672623423700 | -0.37764934124176 | -7.70302636543479 |
| H    | 4.12957749101252 | 0.81244829423451  | -7.79516808576077 |
| H    | 1.92231365515576 | -0.06294942998853 | -7.30655997100554 |
| H    | 2.55155391163564 | -1.77615207035100 | -7.20327790217894 |
| H    | 5.79967252850761 | -2.68306775753384 | -8.59307397688440 |
| H    | 4.44539304183374 | -2.95890246278735 | -7.53802130984625 |
| C    | 1.92125820680286 | -4.56210800657719 | -5.90116855623543 |
| C    | 2.74921143953197 | -5.08496325297779 | -4.98601643260494 |
| C    | 2.87886268570060 | -4.58098743245247 | -3.62888934800746 |
| C    | 3.72727372623313 | -5.06338001194067 | -2.71169191467075 |
| H    | 1.85316079882414 | -4.96778108227450 | -6.90221683662365 |
| H    | 1.28389854517091 | -3.71666957976080 | -5.66614970706166 |
| H    | 3.36677530722988 | -5.93983612002572 | -5.25227823028427 |
| H    | 2.23205811427334 | -3.74971652599125 | -3.36701500781295 |
| H    | 3.77294212247440 | -4.64463758154294 | -1.71473530007862 |
| H    | 4.38454475843643 | -5.89810269788162 | -2.93073317609362 |
| C    | 1.37072530066707 | 1.49417471345039  | 0.16002025675711  |

|   |                   |                   |                   |
|---|-------------------|-------------------|-------------------|
| C | 0.96539084629059  | 2.96512602512519  | 0.31030699242180  |
| C | 5.72978680753562  | -3.21793429107422 | -5.19743363381308 |
| C | 6.30112965633670  | -3.03315818236144 | -4.00200395794062 |
| C | 7.69901002131861  | -2.55409940549736 | -3.72261402681301 |
| C | 7.77391717440620  | -1.80972200554308 | -2.38225438425380 |
| C | 9.20173538165483  | -1.40241169614954 | -1.98464927366976 |
| C | 9.77918008966967  | -0.33347924026951 | -2.91748815559440 |
| C | 0.23878096092669  | -2.37996584954668 | 0.03293983981036  |
| C | 0.06900196461868  | -3.68275234299098 | 0.82425647294348  |
| C | 5.68815215149366  | 4.20913506009511  | -1.52314666012251 |
| C | 5.83213357288560  | 4.13926959806402  | 0.00139150072306  |
| C | 7.39587438910430  | 4.96032180514925  | -5.12363194285375 |
| C | 7.69285433083196  | 5.91964707077281  | -6.28237487150963 |
| C | 2.65190828226093  | 1.21783740063683  | 0.94867280549549  |
| C | -0.90568218231601 | -2.21659957984102 | -0.96910541594990 |
| C | 8.63918198527251  | 4.13190051752323  | -4.79244283611514 |
| C | 4.37711711437231  | 4.90214417406699  | -1.89818957546862 |
| C | 9.19815227872041  | -0.88670125387184 | -0.54067580849672 |
| H | 4.75201495690436  | -3.71010178983581 | -5.23282213686444 |
| H | 5.73982622079532  | -3.34255497910293 | -3.12019526565854 |
| H | 8.35472995975200  | -3.43276426105981 | -3.68051436130301 |
| H | 8.05860918771896  | -1.91749249400504 | -4.53631560963860 |
| H | 7.14102910487013  | -0.91638884278526 | -2.42913451434256 |
| H | 7.36623611629266  | -2.46026401414722 | -1.60062269370648 |
| H | 6.52059998040207  | 4.82462802126610  | -1.90604555144319 |
| H | 5.80161562233202  | 5.14057156056698  | 0.43432518777494  |
| H | 5.02174787464140  | 3.54758592490361  | 0.43128812908613  |
| H | 6.78149927515186  | 3.67175888756858  | 0.26754854339114  |
| H | 4.33367478695953  | 5.90322345582991  | -1.46639188632735 |
| H | 4.29485979813623  | 4.99073133694003  | -2.98833209812797 |
| H | 3.52182931576530  | 4.32939030177844  | -1.53228532857176 |
| H | 7.15003650985428  | 5.57241221354329  | -4.24022790053557 |
| H | 9.48097294333579  | 4.78212384662655  | -4.54902722432650 |
| H | 8.43986448329231  | 3.48723224088309  | -3.92732053525545 |
| H | 8.92089633360522  | 3.50037546761184  | -5.63882825876064 |
| H | 8.52222877572274  | 6.58124657708252  | -6.02671636156308 |
| H | 7.95474344316657  | 5.35989119287593  | -7.18223064749094 |
| H | 6.81341171626341  | 6.52927155093907  | -6.49627411241626 |
| H | 0.56330824517790  | 0.88182226640165  | 0.59681519116475  |
| H | 0.18661267638904  | -1.54519689972955 | 0.75168417022762  |
| H | 2.51653132454081  | 1.46635918653989  | 2.00238486303605  |
| H | 2.92027055831699  | 0.15711160093456  | 0.87481175369897  |
| H | 3.48047091574777  | 1.81153028781381  | 0.55578533307517  |
| H | 0.82096983002793  | 3.21514355036533  | 1.36266218822347  |
| H | 1.73972221093624  | 3.61565884212272  | -0.10073666557133 |
| H | 0.03377101719354  | 3.15388362728010  | -0.22537358278026 |

|   |                   |                   |                   |
|---|-------------------|-------------------|-------------------|
| H | -1.86956038723123 | -2.23316832212771 | -0.45812055997892 |
| H | -0.80952553427386 | -1.25871207309223 | -1.49495457026868 |
| H | -0.88957552505545 | -3.02171156143414 | -1.70784698202439 |
| H | -0.88973649646148 | -3.69023843474909 | 1.34530037414982  |
| H | 0.11146164022500  | -4.54290387161140 | 0.15352851854308  |
| H | 0.86773531595199  | -3.77763621944114 | 1.56169953791666  |
| H | 9.84556433085915  | -2.29290841999452 | -2.03326570039230 |
| H | 10.78413650086881 | -0.05922757578357 | -2.59360980754494 |
| H | 9.84047223966908  | -0.69921150295698 | -3.94289968048116 |
| H | 9.15512547866607  | 0.56320032895466  | -2.90354421776774 |
| H | 10.20653506384237 | -0.60141213491697 | -0.23790257353293 |
| H | 8.54879480302992  | -0.01338377802193 | -0.44889742164524 |
| H | 8.83860359168502  | -1.65930406969325 | 0.14019153606562  |

### Stage 3

**Table S29: *i*-C<sub>4</sub>H<sub>9</sub>-CC-AS-C**

| Atom | x                 | y                 | z                 |
|------|-------------------|-------------------|-------------------|
| C    | 2.19589920206753  | 1.11912515332790  | -1.01630485598968 |
| Al   | 2.97036157847972  | -0.68970646016317 | -1.16031606526009 |
| Cl   | 1.12726459895487  | -1.99368858210468 | -1.79652299862005 |
| Nd   | 1.52336568106037  | -1.62397043844564 | -4.57714644850791 |
| C    | -2.33712437013984 | -0.07281818957515 | -4.64933805059812 |
| C    | 4.09959386699293  | -1.70843586792969 | 0.09681546086951  |
| Cl   | 3.98189612078740  | -0.91400105045517 | -3.23371784929990 |
| Cl   | 1.37317974510939  | 1.17115224716422  | -4.80735358670175 |
| Al   | 2.63639336557630  | 1.36333309271248  | -6.76298128079239 |
| C    | 4.38206560108034  | 2.15396096143573  | -6.29660182682698 |
| Cl   | 3.00352809922275  | -0.93160683839432 | -6.92951336740309 |
| C    | 1.30351690971718  | 1.86617994502103  | -8.13027173436766 |
| H    | 1.87521715316294  | 1.41396217450909  | -2.02326741270124 |
| H    | 1.27659787667653  | 1.05168638271416  | -0.41745546211935 |
| H    | 3.96952202435012  | -2.78215467587545 | -0.09551770274478 |
| H    | 5.15118090469721  | -1.49020436843068 | -0.13726059694771 |
| H    | 0.71665694036776  | 0.97403891983947  | -8.38929335024896 |
| H    | 0.59311495656152  | 2.56458225484973  | -7.66884906658561 |
| H    | 4.64002172252392  | 1.81481178577077  | -5.28452628956741 |
| H    | 5.14899101693867  | 1.72745547156279  | -6.95828283417664 |
| H    | -2.66105472002379 | 0.71381747341634  | -5.33684735163999 |
| H    | -3.24204312746217 | -0.58145237892866 | -4.29006521889431 |
| C    | 0.37370545022924  | -3.34797708898923 | -6.24976494578251 |
| H    | 0.16326817092686  | -2.63869169604743 | -7.04606454738220 |
| H    | 0.93775607065150  | -4.22000418078716 | -6.54999204931956 |
| C    | -0.41755801411016 | -3.38421137515968 | -5.10080530301946 |
| C    | -1.07851390108316 | -2.28947743963598 | -4.56363626351146 |
| H    | -0.31673472944369 | -4.25351184999574 | -4.45138763563354 |
| H    | -1.60018768465168 | -2.41878317776911 | -3.62410299920010 |
| C    | -1.47944352052795 | -1.09748792106943 | -5.40778092079660 |
| H    | -0.61378554378412 | -0.56476797872487 | -5.84619664851064 |
| H    | -2.02242079251169 | -1.44717377900922 | -6.29500963007130 |
| C    | 3.07480054347868  | -4.30890778537451 | -4.11543035174642 |
| C    | 3.93200567798106  | -3.93101108774394 | -5.07533797083626 |
| C    | 3.94761435388434  | -4.41735352156508 | -6.45632039360629 |
| C    | 3.59525306666451  | -5.64500794046799 | -6.83886337914845 |
| H    | 3.18463218799460  | -3.95473991000322 | -3.09726577954034 |
| H    | 2.28225838009046  | -5.02080819915913 | -4.31251972041595 |
| H    | 4.68379952445145  | -3.18773826033110 | -4.82596269669205 |
| H    | 4.30463791208439  | -3.71026926985860 | -7.19847892524604 |
| H    | 3.62897573250866  | -5.93926479131158 | -7.88004592040631 |
| H    | 3.28039193157273  | -6.39846403099709 | -6.12570566956385 |
| C    | -1.62749986799029 | 0.53154998637366  | -3.46353608217000 |

|   |                   |                   |                    |
|---|-------------------|-------------------|--------------------|
| C | -1.61647328864442 | 1.81240887198400  | -3.11378898052072  |
| H | -1.10204492538341 | -0.18839441580835 | -2.83378296350974  |
| H | -1.06092163670726 | 2.10452117289327  | -2.22510706409274  |
| C | -2.27011211626142 | 2.95186452846816  | -3.84409316394642  |
| C | -1.22355447122542 | 3.72690474030195  | -4.66367452917529  |
| H | -3.06448450081350 | 2.58952662367669  | -4.50200480597724  |
| H | -2.72523248263148 | 3.63015682277044  | -3.11441405738043  |
| H | -0.43712805060797 | 4.07492632190331  | -3.98448887819850  |
| H | -0.75944115222954 | 3.04499654161052  | -5.38597917290553  |
| C | 3.07814163068226  | 2.23190392362394  | -0.43581662766639  |
| C | 2.33254887502380  | 3.57120258510552  | -0.49471756679549  |
| C | 4.41218596418828  | 2.33927356133165  | -1.17704546100951  |
| C | 3.86104142016616  | -1.42971575103324 | 1.58791219027305   |
| C | 4.82244803345296  | -2.26402910344537 | 2.44315198106012   |
| C | 2.41259566836392  | -1.71904653440211 | 1.98716986847876   |
| C | 4.47745206351120  | 3.68462854755722  | -6.35778231186331  |
| C | 5.86571384599328  | 4.14686506322270  | -5.89874346250650  |
| C | 1.84747882658552  | 2.50096089569048  | -9.41767433300445  |
| C | 0.69252106685402  | 2.85824866069450  | -10.36122277435956 |
| C | 2.83877731423937  | 1.57200253302796  | -10.12162100840187 |
| C | 3.39468760356946  | 4.35339032846864  | -5.50846732904778  |
| H | 4.34246111011419  | 4.01438268450791  | -7.40160141479587  |
| H | 5.94939758603706  | 5.23239362045291  | -5.97305637461837  |
| H | 6.03934426762302  | 3.85145273680449  | -4.86218971971193  |
| H | 6.63669332295277  | 3.69338276045120  | -6.52364890216442  |
| H | 3.46955788970030  | 5.43991975225420  | -5.57465273141289  |
| H | 2.40212585989292  | 4.05270492757478  | -5.86382015081463  |
| H | 3.49018523342916  | 4.06236492631332  | -4.45952324016636  |
| H | 2.37446682754227  | 3.43673805041998  | -9.16744887191737  |
| H | 3.22199429321540  | 2.03695936377448  | -11.03122506665689 |
| H | 3.68640494819928  | 1.35764450297927  | -9.45903922769967  |
| H | 2.35970672751971  | 0.62695061183443  | -10.38918341528965 |
| H | 1.07284696831019  | 3.33010348439674  | -11.26870160597750 |
| H | 0.13634803719839  | 1.96079797470745  | -10.63856943363620 |
| H | 0.00907352568468  | 3.55143878528111  | -9.86782228957116  |
| H | 3.29230739689355  | 2.01286831031790  | 0.62383486455149   |
| H | 4.06688874285222  | -0.36636647439129 | 1.79612118770164   |
| H | 5.02014554568301  | 3.14378822588418  | -0.76050234248618  |
| H | 4.97036184850055  | 1.39967705440449  | -1.08319680686020  |
| H | 4.24844491442169  | 2.54180487004317  | -2.23880839721245  |
| H | 2.93951105842427  | 4.36636805272956  | -0.05870307021952  |
| H | 2.10283273703648  | 3.83183062034516  | -1.52982178334835  |
| H | 1.39587583332994  | 3.50195567954884  | 0.06078689075016   |
| H | 2.26045544878614  | -1.52006859720877 | 3.04913042640527   |
| H | 1.73014701079354  | -1.07874593261551 | 1.41492249884835   |
| H | 2.15808860867387  | -2.76308549289095 | 1.78885738431648   |

|   |                   |                   |                   |
|---|-------------------|-------------------|-------------------|
| H | 4.67596018120148  | -2.04636829331255 | 3.50234349681722  |
| H | 4.65269573706883  | -3.32926105339939 | 2.27622664033433  |
| H | 5.85505362729020  | -2.03089904388047 | 2.17852055969034  |
| C | -1.81179723994793 | 4.93582567691361  | -5.40754883169836 |
| C | -0.67743374348150 | 5.81181842545026  | -5.95199640231628 |
| C | -2.73360895516916 | 4.50301467586264  | -6.55277776493792 |
| H | -2.39727808420220 | 5.53515014743758  | -4.69524140911025 |
| H | -3.10225982048305 | 5.37883850389576  | -7.08847323691969 |
| H | -2.19559512159978 | 3.86684464063116  | -7.25880892076501 |
| H | -3.59321767111910 | 3.94974347382807  | -6.17373331812444 |
| H | -1.08486228125940 | 6.69156989301755  | -6.45179553071377 |
| H | -0.02916543638149 | 6.14469205711982  | -5.14027179600667 |
| H | -0.07527622997517 | 5.25372702848075  | -6.67273456398904 |

**Stage 3****Table S30: *i*-C<sub>4</sub>H<sub>9</sub>-TT-AS-T**

| Atom | x            | y            | z            |
|------|--------------|--------------|--------------|
| C    | -0.059863000 | -2.480699000 | -1.719608000 |
| Al   | 1.867501000  | -2.499773000 | -2.163606000 |
| Cl   | 2.026421000  | -2.736022000 | -4.486959000 |
| Nd   | 3.207013000  | -0.181270000 | -5.004239000 |
| C    | 3.185521000  | 0.267657000  | -7.544597000 |
| C    | 3.608742000  | -1.070729000 | -7.531278000 |
| C    | 4.701637000  | -1.557335000 | -6.842493000 |
| C    | 5.051558000  | -3.034023000 | -6.788657000 |
| C    | 6.539266000  | -3.307140000 | -6.524053000 |
| C    | 3.285185000  | -3.617508000 | -1.370993000 |
| Cl   | 2.629454000  | -0.312294000 | -2.191372000 |
| Cl   | 2.643830000  | 2.599399000  | -4.809371000 |
| Al   | 4.692457000  | 3.186408000  | -3.898591000 |
| C    | 4.577076000  | 3.128126000  | -1.931776000 |
| Cl   | 5.650258000  | 1.114874000  | -4.455424000 |
| C    | 5.409139000  | 4.577391000  | -5.098193000 |
| H    | -0.486882000 | -1.512394000 | -2.006655000 |
| H    | -0.576934000 | -3.229191000 | -2.335835000 |
| H    | 4.091790000  | -3.716064000 | -2.107277000 |
| H    | 3.721961000  | -3.084286000 | -0.515962000 |
| H    | 5.657495000  | 4.118212000  | -6.064591000 |
| H    | 4.598129000  | 5.289297000  | -5.308924000 |
| H    | 3.909048000  | 2.300505000  | -1.660956000 |
| H    | 5.566551000  | 2.850073000  | -1.543653000 |
| H    | 7.156490000  | -2.712902000 | -7.211703000 |
| H    | 6.760160000  | -4.356995000 | -6.757013000 |
| H    | 5.513358000  | -0.862974000 | -6.621475000 |
| H    | 2.895986000  | -1.812391000 | -7.894499000 |
| H    | 2.310123000  | 0.546973000  | -8.114478000 |
| H    | 3.928090000  | 1.060075000  | -7.437862000 |
| H    | 4.788459000  | -3.489541000 | -7.748914000 |
| H    | 4.445091000  | -3.559250000 | -6.043991000 |
| C    | 0.220833000  | 0.093857000  | -5.900412000 |
| C    | -0.152274000 | 0.232294000  | -4.616713000 |
| C    | -0.481418000 | 1.499664000  | -3.988600000 |
| C    | -0.883587000 | 1.613868000  | -2.720771000 |
| H    | 0.378705000  | -0.885715000 | -6.334981000 |
| H    | 0.300754000  | 0.947962000  | -6.561050000 |
| H    | -0.240838000 | -0.656899000 | -4.000589000 |
| H    | -0.386698000 | 2.387131000  | -4.606170000 |
| H    | -1.127574000 | 2.576773000  | -2.290790000 |
| H    | -0.976666000 | 0.750077000  | -2.073598000 |
| C    | -0.395249000 | -2.742256000 | -0.243989000 |

|   |              |              |              |
|---|--------------|--------------|--------------|
| C | -1.911662000 | -2.673928000 | -0.025786000 |
| C | 7.022188000  | -3.065720000 | -5.115309000 |
| C | 6.307708000  | -2.664164000 | -4.073405000 |
| C | 6.864819000  | -2.562233000 | -2.680873000 |
| C | 6.517884000  | -1.226029000 | -2.014183000 |
| C | 6.863822000  | -1.196991000 | -0.517613000 |
| C | 8.379075000  | -1.154318000 | -0.293637000 |
| C | 2.865801000  | -5.020982000 | -0.911967000 |
| C | 4.074948000  | -5.771914000 | -0.340989000 |
| C | 4.114945000  | 4.402418000  | -1.212312000 |
| C | 4.029043000  | 4.146793000  | 0.297799000  |
| C | 6.625335000  | 5.357625000  | -4.578845000 |
| C | 7.047633000  | 6.421377000  | -5.599561000 |
| C | 0.313193000  | -1.748191000 | 0.678919000  |
| C | 2.242030000  | -5.822846000 | -2.056318000 |
| C | 7.798338000  | 4.424762000  | -4.270892000 |
| C | 2.765674000  | 4.892079000  | -1.742509000 |
| C | 6.197497000  | 0.010259000  | 0.150555000  |
| H | 8.075349000  | -3.306028000 | -4.981077000 |
| H | 5.246914000  | -2.412499000 | -4.167894000 |
| H | 6.436509000  | -3.375935000 | -2.080942000 |
| H | 7.949338000  | -2.706661000 | -2.705674000 |
| H | 7.040569000  | -0.413352000 | -2.529980000 |
| H | 5.439802000  | -1.051734000 | -2.127592000 |
| H | 4.857368000  | 5.201772000  | -1.374738000 |
| H | 3.733171000  | 5.056514000  | 0.822781000  |
| H | 3.297474000  | 3.364665000  | 0.509291000  |
| H | 5.000278000  | 3.824954000  | 0.677222000  |
| H | 2.444258000  | 5.786541000  | -1.206713000 |
| H | 2.849759000  | 5.138954000  | -2.808037000 |
| H | 2.000582000  | 4.120711000  | -1.623205000 |
| H | 6.350542000  | 5.879696000  | -3.647044000 |
| H | 8.655652000  | 4.993438000  | -3.907544000 |
| H | 7.509772000  | 3.702197000  | -3.497782000 |
| H | 8.099732000  | 3.874396000  | -5.165590000 |
| H | 7.894579000  | 6.996740000  | -5.222205000 |
| H | 7.333773000  | 5.951465000  | -6.542324000 |
| H | 6.218729000  | 7.105050000  | -5.790068000 |
| H | -0.064535000 | -3.757901000 | 0.030966000  |
| H | 2.117213000  | -4.933714000 | -0.107052000 |
| H | 0.071619000  | -1.955020000 | 1.722749000  |
| H | 1.400410000  | -1.827054000 | 0.554743000  |
| H | 0.011292000  | -0.723393000 | 0.449619000  |
| H | -2.157035000 | -2.890079000 | 1.015386000  |
| H | -2.286714000 | -1.679713000 | -0.275561000 |
| H | -2.414064000 | -3.404693000 | -0.661614000 |



|   |             |              |              |
|---|-------------|--------------|--------------|
| H | 1.952145000 | -6.817575000 | -1.714192000 |
| H | 1.346401000 | -5.312114000 | -2.430288000 |
| H | 2.949423000 | -5.932215000 | -2.882190000 |
| H | 3.775567000 | -6.755451000 | 0.024843000  |
| H | 4.838977000 | -5.901177000 | -1.110019000 |
| H | 4.508022000 | -5.208124000 | 0.486810000  |
| H | 6.467473000 | -2.110403000 | -0.049098000 |
| H | 8.600013000 | -1.118947000 | 0.774019000  |
| H | 8.857490000 | -2.040555000 | -0.711496000 |
| H | 8.811376000 | -0.270343000 | -0.766404000 |
| H | 6.432713000 | 0.032684000  | 1.215329000  |
| H | 6.550462000 | 0.940071000  | -0.301068000 |
| H | 5.112767000 | -0.043089000 | 0.038482000  |

### Stage 3

**Table S31: *i*-C<sub>4</sub>H<sub>9</sub>-CC-AS-trans-cis transition state**

| Atom | x                 | y                 | z                 |
|------|-------------------|-------------------|-------------------|
| C    | -0.34929183384573 | 0.45266894206305  | -0.12449011597438 |
| Al   | 0.13811148980393  | 0.19118622350213  | 1.77000560713738  |
| Cl   | 2.41428010310906  | -0.31620124996882 | 1.77921165479783  |
| Nd   | 3.33978897872597  | 2.18585323624684  | 2.69663949173482  |
| C    | 7.56082920356328  | 4.18142072078868  | 3.06689885303234  |
| C    | -0.71645035026146 | -0.89775027002454 | 3.17953292709463  |
| Cl   | 0.46793887249137  | 2.26477892336989  | 2.75016757531195  |
| Cl   | 3.30301728997199  | 2.85496492802405  | -0.02634809135959 |
| Al   | 2.46536080765580  | 5.01928098585616  | 0.26657499879244  |
| C    | 0.49620395467400  | 4.98083150990428  | 0.13960474829141  |
| Cl   | 2.93302193613662  | 5.02520624726117  | 2.56736506149162  |
| C    | 3.73630820495878  | 6.20368940940957  | -0.66780674066037 |
| H    | 0.02969846356062  | 1.43255114350528  | -0.44324799454120 |
| H    | 0.19737452028725  | -0.28666146441484 | -0.72642936142108 |
| H    | 0.04244917794936  | -1.12600350372954 | 3.94093357222763  |
| H    | -1.46775054788335 | -0.27670105894221 | 3.68725167909939  |
| H    | 4.64815233951252  | 6.29115430871086  | -0.06622296889653 |
| H    | 4.04224264378518  | 5.70568958947816  | -1.59882448689668 |
| H    | 0.14038966721560  | 3.97196588483904  | 0.37879161931419  |
| H    | 0.09277586901920  | 5.63116518197992  | 0.92859218904839  |
| H    | 7.78970907277696  | 4.82957523507380  | 3.92084071901472  |
| H    | 8.42304670720401  | 3.52230330248333  | 2.91795441172159  |
| C    | 5.02978628799902  | 0.58781083250054  | 3.93779989847910  |
| H    | 5.22126035635622  | 1.15175323173069  | 4.84648627470227  |
| H    | 4.75412712487151  | -0.44647128406876 | 4.09687408910957  |
| C    | 5.69813612729690  | 0.94026610910985  | 2.75162158578727  |
| C    | 6.07089803384474  | 2.22221162164517  | 2.39922642200705  |
| H    | 5.69767591720080  | 0.20148047074582  | 1.95043072802622  |
| H    | 6.44619761717769  | 2.39243926030933  | 1.39738340892741  |
| C    | 6.32964753630270  | 3.31252885504817  | 3.41917213410137  |
| H    | 5.47897053684123  | 4.00111076581431  | 3.55264820684932  |
| H    | 6.49441854177982  | 2.85632302912475  | 4.39950097536261  |
| C    | 3.33574593055049  | 3.28556384086267  | 5.70719152481252  |
| C    | 2.14913826808420  | 2.67327237218789  | 5.70792047113818  |
| C    | 1.91879239937036  | 1.26009238985792  | 6.08890949213103  |
| C    | 1.67414919570317  | 0.84602168412062  | 7.32591367969991  |
| H    | 3.42712830106225  | 4.32524229882857  | 5.41707485920262  |
| H    | 4.23118796688198  | 2.78332447390311  | 6.05035432764045  |
| H    | 1.27713826787570  | 3.22191095436733  | 5.36010257483857  |
| H    | 1.86451727666224  | 0.54264259657199  | 5.27157956667075  |
| H    | 1.67579108188613  | 1.53132416721205  | 8.16589434233165  |
| H    | 1.46739766070526  | -0.19555854745964 | 7.53701444853088  |
| C    | 7.35685476038564  | 5.02605668492468  | 1.83534315955232  |

|   |                   |                   |                   |
|---|-------------------|-------------------|-------------------|
| C | 6.78446614568751  | 6.22525606152911  | 1.81638700901676  |
| H | 7.71750821417348  | 4.59391122616040  | 0.90506786939597  |
| H | 6.70390823039224  | 6.75283702932886  | 0.86861168459724  |
| C | 6.20392352870994  | 6.95156832498201  | 2.99770943657564  |
| C | 6.40452067295829  | 8.46826800443409  | 2.88383559606659  |
| H | 5.13053127541864  | 6.72981445356526  | 3.04185949345250  |
| H | 6.64594862631496  | 6.59186020259844  | 3.93296861981281  |
| H | 7.47708932219791  | 8.67475838012568  | 2.79926902280677  |
| H | 5.92608491370865  | 8.83230362981857  | 1.96757248771092  |
| C | -1.84229225416953 | 0.35479223317507  | -0.46114334069541 |
| C | -2.06322465887641 | 0.57527709093172  | -1.96229170699227 |
| C | -2.66706196677493 | 1.35853802065169  | 0.34629985515964  |
| C | -1.38198178799991 | -2.20612782545619 | 2.73006859154587  |
| C | -1.97225294358701 | -2.94273155429704 | 3.93881326389501  |
| C | -0.39494635817506 | -3.11239487285951 | 1.99138906459272  |
| C | -0.08912245493156 | 5.41890908722517  | -1.20813680179528 |
| C | -1.62020406663037 | 5.45400337915536  | -1.13914246073455 |
| C | 3.22370010533022  | 7.60955259345544  | -1.01039734452323 |
| C | 4.31799570056891  | 8.41656977048720  | -1.71983296659641 |
| C | 2.74661874277505  | 8.35554462766082  | 0.23683463340033  |
| C | 0.37055579946802  | 4.49832270406277  | -2.33958064782603 |
| H | 0.25296386588281  | 6.44227151940003  | -1.44036522077715 |
| H | -2.03816959460622 | 5.77299663541924  | -2.09537958916193 |
| H | -2.01290462257083 | 4.46453949595646  | -0.89743296495133 |
| H | -1.94346762042777 | 6.15262570503953  | -0.36578168773619 |
| H | -0.03805307693229 | 4.82849851090209  | -3.29588600241959 |
| H | 1.46514435898541  | 4.50534227207893  | -2.40956481801546 |
| H | 0.04145010623169  | 3.47254623869845  | -2.15680303098454 |
| H | 2.37110956824556  | 7.52574530587703  | -1.70454690604373 |
| H | 2.37046082987325  | 9.34521860693515  | -0.02665061981022 |
| H | 1.93869977886623  | 7.79699044358629  | 0.72500351554776  |
| H | 3.56523139600117  | 8.47420967902478  | 0.94983325739596  |
| H | 3.94429621835131  | 9.40407440073258  | -1.99576219261932 |
| H | 5.18393509127779  | 8.53967130263718  | -1.06686625006224 |
| H | 4.63712765166812  | 7.89813133080731  | -2.62538188728729 |
| H | -2.20423743477784 | -0.65846298386409 | -0.21665438604499 |
| H | -2.21267062698626 | -1.97370299549691 | 2.04329035294245  |
| H | -3.72643659584187 | 1.27307897559874  | 0.09974257031067  |
| H | -2.54498893144035 | 1.16966466241114  | 1.41989855275877  |
| H | -2.34297537048889 | 2.38028435268012  | 0.13511339186419  |
| H | -3.12237178212243 | 0.48575173069837  | -2.20931841422485 |
| H | -1.71762910233663 | 1.56867693425560  | -2.25443015816712 |
| H | -1.50633003386318 | -0.16766067122017 | -2.53542082473317 |
| H | -0.88270029630388 | -4.03697588008407 | 1.67876999559127  |
| H | -0.01419487668170 | -2.60350878253055 | 1.09729240299107  |
| H | 0.45181351678226  | -3.36614153229636 | 2.63402999756887  |

|   |                   |                   |                  |
|---|-------------------|-------------------|------------------|
| H | -2.47389016783107 | -3.85795541585986 | 3.62010364628277 |
| H | -1.18370930855179 | -3.20293169233236 | 4.64745084950606 |
| H | -2.69822968580146 | -2.30526171315778 | 4.44613282400681 |
| C | 5.84644822223331  | 9.23524467810392  | 4.09474098597528 |
| C | 6.30944935810963  | 10.69610444780623 | 4.03971760727707 |
| C | 4.31641028181886  | 9.17264374438162  | 4.15514252899224 |
| H | 6.24996770864480  | 8.78059529619252  | 5.01140989456034 |
| H | 3.95158734476959  | 9.75063736592525  | 5.00533592208931 |
| H | 3.88046543032900  | 9.58651333615113  | 3.24394629428228 |
| H | 3.97175439960806  | 8.14456036758059  | 4.27074676413336 |
| H | 5.93089215521389  | 11.24563467349669 | 4.90261610534206 |
| H | 7.39892296383663  | 10.75054285205088 | 4.04651205272414 |
| H | 5.94361266502669  | 11.18036206492575 | 3.13256413876900 |

### Stage 3

**Table S32: *i*-C<sub>4</sub>H<sub>9</sub>-CC-AS-C-TS inclusion *cis*-C<sub>4</sub>H<sub>8</sub> in polymer. Transition state**

| Atom | x                 | y                 | z                 |
|------|-------------------|-------------------|-------------------|
| C    | -0.24534785224546 | 0.44945362183008  | -0.05803869500686 |
| Al   | 0.21056494711064  | 0.27320339475468  | 1.85514788311965  |
| Cl   | 2.47490225971259  | -0.26590504507824 | 1.91669347818139  |
| Nd   | 3.35390517056229  | 2.27370235595754  | 2.89221819847180  |
| C    | 7.80540071715181  | 4.01134979443478  | 2.52886936676099  |
| C    | -0.66013556805020 | -0.77687244687613 | 3.28698141033705  |
| Cl   | 0.50253168264639  | 2.38858578718235  | 2.74911430439145  |
| Cl   | 3.23503092806912  | 2.79228555331011  | 0.05251740474278  |
| Al   | 2.52001001950191  | 4.97985128342790  | 0.25110518302723  |
| C    | 0.54911375158562  | 5.04258179021189  | 0.15369951705198  |
| Cl   | 3.06675822168033  | 5.07457365350061  | 2.53709919319795  |
| C    | 3.81362849578678  | 6.07770388120410  | -0.75905228636482 |
| H    | 0.11343347251973  | 1.42724376386844  | -0.40440696873243 |
| H    | 0.33462536455881  | -0.29520822930143 | -0.62081739723055 |
| H    | 0.07867747271212  | -0.94113475988583 | 4.08409443808923  |
| H    | -1.45372254701885 | -0.16602364779165 | 3.73961520642996  |
| H    | 4.75950005240218  | 6.10340184023855  | -0.20623337421169 |
| H    | 4.03609254301477  | 5.55821341513131  | -1.70206915471226 |
| H    | 0.15421645310165  | 4.06312595219976  | 0.44599141453419  |
| H    | 0.18383066389417  | 5.74899815894940  | 0.91222837537102  |
| H    | 8.21655724425467  | 4.60091496889601  | 3.35613570247200  |
| H    | 8.57333037138129  | 3.28818917989870  | 2.23486939708351  |
| C    | 5.49572938371010  | 0.45639551772322  | 3.82017887731647  |
| H    | 6.12288287088079  | 0.95178008483372  | 4.55119367677684  |
| H    | 5.56003004841527  | -0.62082711287129 | 3.88827567443953  |
| C    | 5.68075364610047  | 0.93951614699704  | 2.46495177270195  |
| C    | 6.08068162624030  | 2.19062451513994  | 2.10580573837438  |
| H    | 5.39823720221078  | 0.26340068144881  | 1.66153413875552  |
| H    | 6.13140692960763  | 2.42686659606990  | 1.04879971360333  |
| C    | 6.56684976976612  | 3.24467056801024  | 3.05627483180367  |
| H    | 5.77962042439331  | 3.98505922317884  | 3.27436929805735  |
| H    | 6.81630355660890  | 2.79507745409676  | 4.01826143790455  |
| C    | 3.91137860702157  | 3.28411018061738  | 5.60192203451007  |
| C    | 2.76784789977123  | 2.54187322679133  | 5.54738634233375  |
| C    | 2.69710852451794  | 1.17655679859620  | 5.14309296661213  |
| C    | 3.82968019553507  | 0.32401199298287  | 5.11594385442565  |
| H    | 3.87867276624297  | 4.34159486984415  | 5.82002311367830  |
| H    | 4.89327574754698  | 2.82598227102058  | 5.58277437631161  |
| H    | 1.82029293316814  | 3.06450582802537  | 5.64788645619441  |
| H    | 1.72430117612044  | 0.75041305325918  | 4.93497949808819  |
| H    | 4.56756154188546  | 0.46438066861247  | 5.89488353354067  |
| H    | 3.61854363228836  | -0.70975981844386 | 4.88473830878463  |
| C    | 7.49911712283498  | 4.92789465757368  | 1.37266395204185  |

|   |                   |                   |                   |
|---|-------------------|-------------------|-------------------|
| C | 6.95662993878922  | 6.13542971815308  | 1.49006095884620  |
| H | 7.76006460810870  | 4.55133149272008  | 0.38682099472887  |
| H | 6.79708981927061  | 6.73204536422837  | 0.59521728394172  |
| C | 6.50932768844003  | 6.77561725501073  | 2.77551017226165  |
| C | 6.61814674939790  | 8.30404351887538  | 2.72245126974640  |
| H | 5.46461342815648  | 6.49221762036096  | 2.95467730821206  |
| H | 7.09429990480134  | 6.39594806960213  | 3.62055701618507  |
| H | 7.65787908176897  | 8.57576075296172  | 2.50980265494361  |
| H | 6.00300755736377  | 8.68598163090191  | 1.89993325017100  |
| C | -1.72848579956724 | 0.29831768081804  | -0.42235397322443 |
| C | -1.92605759114212 | 0.46749163025703  | -1.93322379377917 |
| C | -2.59685783193842 | 1.30267634722214  | 0.33754891205400  |
| C | -1.25798766245016 | -2.13218527341282 | 2.87732084492094  |
| C | -1.84048089771118 | -2.84902231757862 | 4.10150104806327  |
| C | -0.21872291751074 | -3.02342278646180 | 2.19346234264348  |
| C | -0.03295719718180 | 5.43584600957776  | -1.21006686174477 |
| C | -1.56390326822303 | 5.47919905975818  | -1.14364748420941 |
| C | 3.38134005866160  | 7.51519777646286  | -1.08355980208095 |
| C | 4.49015966282432  | 8.24390175898656  | -1.85242980227058 |
| C | 3.02010438933461  | 8.29631272527673  | 0.18110480952203  |
| C | 0.41936220113782  | 4.47283923861731  | -2.30927164712893 |
| H | 0.31626585339303  | 6.44789390628285  | -1.47819155376244 |
| H | -1.98006338856302 | 5.78932354473123  | -2.10363249559523 |
| H | -1.95942465686631 | 4.49295537606306  | -0.89269493036392 |
| H | -1.88557803440958 | 6.18679950376079  | -0.37785875346718 |
| H | 0.00571307213411  | 4.76818172731550  | -3.27476066273054 |
| H | 1.51358520593653  | 4.47539109554124  | -2.38626953838092 |
| H | 0.09052122286879  | 3.45447852858033  | -2.08754799276157 |
| H | 2.49002820232226  | 7.48796747475238  | -1.73243290481684 |
| H | 2.69515243352684  | 9.30703977922056  | -0.07074434303089 |
| H | 2.20519881173863  | 7.79403027933314  | 0.71634080874459  |
| H | 3.88151150710093  | 8.36635869069099  | 0.84889023520643  |
| H | 4.17220149482474  | 9.25412039251942  | -2.11575029920539 |
| H | 5.39443717610460  | 8.30874012506310  | -1.24438040099889 |
| H | 4.72724625494692  | 7.70198759071054  | -2.76941543400913 |
| H | -2.06642185591434 | -0.71706256903200 | -0.15317882082221 |
| H | -2.08299803576967 | -1.96338022499747 | 2.16554037291810  |
| H | -3.64932696805041 | 1.17501381917437  | 0.07963619105676  |
| H | -2.48499873709148 | 1.15565871708511  | 1.41898564811752  |
| H | -2.30243322645516 | 2.32664699581448  | 0.09527939230446  |
| H | -2.97492140720300 | 0.32788603796320  | -2.20036024179554 |
| H | -1.61470570192877 | 1.46601055208461  | -2.24622360665581 |
| H | -1.32709544862245 | -0.26755450147275 | -2.47333235552371 |
| H | -0.66092585615036 | -3.97965076504346 | 1.90917434702570  |
| H | 0.15837752925772  | -2.53483693315734 | 1.28661268933200  |
| H | 0.62491259793563  | -3.21588940421083 | 2.86111242951887  |

|   |                   |                   |                  |
|---|-------------------|-------------------|------------------|
| H | -2.29685708852845 | -3.79615548347110 | 3.80886423480258 |
| H | -1.05550138359865 | -3.04937915224104 | 4.83329449263420 |
| H | -2.60221504972615 | -2.22517237135930 | 4.57197794364295 |
| C | 6.18916669167117  | 8.97462281220430  | 4.03857363749384 |
| C | 6.54865580176381  | 10.46473088746535 | 4.00167678163196 |
| C | 4.68973859308357  | 8.80323653071238  | 4.30598685983726 |
| H | 6.74493756162669  | 8.50687384264683  | 4.86450768218945 |
| H | 4.41171995630404  | 9.32601981948790  | 5.22219640649445 |
| H | 4.10285860352959  | 9.21404657845508  | 3.48222629292617 |
| H | 4.43255202543967  | 7.75036786055460  | 4.42590491073660 |
| H | 6.27148017393389  | 10.94391359419157 | 4.94159396858847 |
| H | 7.62139600580842  | 10.59383089504700 | 3.85164265225428 |
| H | 6.02141273709583  | 10.96615254662599 | 3.18818384440271 |

### Stage 3

**Table S33: *i*-C<sub>4</sub>H<sub>9</sub>-CC-AS-T-TS inclusion *trans*-C<sub>4</sub>H<sub>8</sub> in polymer. Transition state**

| Atom | x                 | y                 | z                 |
|------|-------------------|-------------------|-------------------|
| C    | 0.87345288058451  | 6.54334128705185  | 1.54505856190253  |
| Al   | 0.79804294021603  | 5.70288817058635  | 3.32925097479061  |
| Cl   | 0.59080179893476  | 3.40557030566318  | 2.86203353760714  |
| Nd   | 3.31003791343249  | 2.76635458698992  | 3.24222034454899  |
| C    | 5.81856293902868  | -1.45779512387543 | 0.82852899945424  |
| C    | -0.37004303505273 | 6.11937510729394  | 4.86664117869286  |
| Cl   | 2.91256309710835  | 5.45799092469418  | 4.21550281333163  |
| Cl   | 3.94285538273294  | 4.31979114465230  | 0.88305390757542  |
| Al   | 6.15324306912420  | 4.68536351461798  | 1.43891615580910  |
| C    | 6.30281867885975  | 6.48651319712047  | 2.22997536314654  |
| Cl   | 6.10366808694905  | 3.24300225255404  | 3.30067820870204  |
| C    | 7.20171141040244  | 3.80628354404617  | 0.01236861515005  |
| H    | 1.84449196946289  | 6.30233352409075  | 1.09550724199178  |
| H    | 0.12073711215138  | 6.05826431394695  | 0.90747287867727  |
| H    | -0.42945480959991 | 5.23018871261868  | 5.50934342541797  |
| H    | 0.12655974478662  | 6.88979525510161  | 5.47353385829820  |
| H    | 7.28572841188818  | 2.73554496362412  | 0.23787872566089  |
| H    | 6.61815804405655  | 3.87013818582520  | -0.91677197786324 |
| H    | 5.34521132411640  | 6.70761209942309  | 2.71992780641643  |
| H    | 7.05107159689287  | 6.46121596836517  | 3.03437793245800  |
| H    | 6.22579760575722  | -2.30600340677326 | 1.39163291920703  |
| H    | 5.07148090996682  | -1.85771728506314 | 0.13484166177292  |
| C    | 2.11621752948297  | 0.37109280090411  | 2.09875547542225  |
| H    | 2.14319812417557  | -0.70668225492921 | 2.15296014868795  |
| H    | 1.10793256896642  | 0.73970538759148  | 1.94801445987017  |
| C    | 3.11975929363893  | 0.95881356729356  | 1.22930265548517  |
| C    | 4.43910044599823  | 0.64958255186009  | 1.14824162981035  |
| H    | 2.78816818714814  | 1.79446002345245  | 0.61206117981012  |
| H    | 5.05329610978734  | 1.24959228088552  | 0.48408399682723  |
| C    | 5.12738132209289  | -0.49272673004936 | 1.82780082239337  |
| H    | 5.89125695339712  | -0.10410015958775 | 2.50789396218711  |
| H    | 4.42185155363276  | -1.05803181769182 | 2.43899978068181  |
| C    | 3.98018558970024  | 2.89108308725913  | 6.23857375673417  |
| C    | 3.08249135766980  | 1.96868055460388  | 5.81803382230642  |
| C    | 3.38073569194962  | 0.81872317817922  | 5.01043475973693  |
| C    | 2.40706893712400  | 0.09872446939296  | 4.31065790474003  |
| H    | 3.66623692918656  | 3.76214318300337  | 6.79392409790324  |
| H    | 5.04475855323131  | 2.76141197953569  | 6.08204095773673  |
| H    | 2.02627254267806  | 2.16257631311726  | 6.01338127020964  |
| H    | 4.41114447148081  | 0.47325634023348  | 4.98011408476912  |
| H    | 1.36049710089754  | 0.29319030256025  | 4.51576649405059  |
| H    | 2.63138340749542  | -0.92288118951709 | 4.05688313363774  |
| C    | 6.92463098999245  | -0.79479913234768 | 0.04463144641437  |



|   |                   |                   |                   |
|---|-------------------|-------------------|-------------------|
| C | 8.13854269720611  | -0.51364103976366 | 0.50709717568109  |
| H | 6.67793852876378  | -0.53920958961877 | -0.98304584187097 |
| H | 8.85744952012418  | -0.03523743449959 | -0.15391390670204 |
| C | 8.63706115564320  | -0.75469785733098 | 1.90420343796989  |
| C | 8.82069302463476  | 0.58981944096077  | 2.62903164518822  |
| H | 7.94249869140942  | -1.39009484599902 | 2.45996687175937  |
| H | 9.60281723979188  | -1.27079457154542 | 1.86327627936550  |
| H | 9.62742913124933  | 1.13980797610766  | 2.13255835415461  |
| H | 7.90470184452693  | 1.18288776359618  | 2.52566382088082  |
| C | 0.65543673009086  | 8.06175861995893  | 1.49254987349551  |
| C | 0.76451682288997  | 8.56236870989728  | 0.04729970451555  |
| C | 1.65550338025810  | 8.80021576491587  | 2.38409409860188  |
| C | -1.79131221436645 | 6.59880254083363  | 4.53249717969628  |
| C | -2.57633204175798 | 6.87726755068388  | 5.82007183807806  |
| C | -2.54091169535984 | 5.58035837501747  | 3.67062339337776  |
| C | 6.65501382668437  | 7.63059517305270  | 1.26790847138504  |
| C | 6.66013140787893  | 8.96975908111233  | 2.01457686174179  |
| C | 8.60379077904216  | 4.37608400593661  | -0.25256076644755 |
| C | 9.27457247410900  | 3.62734483486537  | -1.41031910632592 |
| C | 9.48628594096113  | 4.30775011804773  | 0.99502673714487  |
| C | 5.68591526586021  | 7.69126916915186  | 0.08559212407461  |
| H | 7.66978322451229  | 7.46791405946078  | 0.86701197734321  |
| H | 6.94107182678060  | 9.78204064430348  | 1.34197451156003  |
| H | 5.66995304801617  | 9.17962198074393  | 2.42385988844720  |
| H | 7.37519454428559  | 8.93526344334322  | 2.83813660064563  |
| H | 5.95329438722067  | 8.50541366320558  | -0.58994276434075 |
| H | 5.71881678495899  | 6.75010891599942  | -0.47743793055879 |
| H | 4.66254660539565  | 7.85172706797299  | 0.43370425440619  |
| H | 8.51370077564827  | 5.43511209522936  | -0.54786971226359 |
| H | 10.45494581195086 | 4.77344349449365  | 0.80641390676377  |
| H | 9.00578628725325  | 4.83257672426150  | 1.82955817691601  |
| H | 9.65427393482813  | 3.27011146804605  | 1.29043129858673  |
| H | 10.26051708859685 | 4.04694196497866  | -1.61747541310895 |
| H | 9.38899063126724  | 2.57032800082292  | -1.16266783939066 |
| H | 8.66434344816941  | 3.70789212647277  | -2.31137240336094 |
| H | -0.36102452278027 | 8.29686703150668  | 1.85187960736408  |
| H | -1.73102782899937 | 7.54404017903749  | 3.96751023342362  |
| H | 1.49469125767236  | 9.87824164669406  | 2.33405971858023  |
| H | 1.53695879435967  | 8.48066190010335  | 3.42700838650060  |
| H | 2.68070526814913  | 8.58706021367712  | 2.07084132781947  |
| H | 0.58294211159089  | 9.63740278188296  | -0.00041940637728 |
| H | 1.75975575556136  | 8.35642531001298  | -0.35135193001365 |
| H | 0.02869258482478  | 8.05590910368832  | -0.57950711298699 |
| H | -3.54869429931617 | 5.93459280870286  | 3.44759416616697  |
| H | -2.01165640908556 | 5.42740232854590  | 2.72232825141934  |
| H | -2.61665126135685 | 4.61929238122297  | 4.18544408209660  |

|   |                   |                   |                  |
|---|-------------------|-------------------|------------------|
| H | -3.57570163008389 | 7.24791038272925  | 5.58572910269909 |
| H | -2.67034040797623 | 5.96510434370635  | 6.41237952043145 |
| H | -2.05744225086633 | 7.62772597581055  | 6.41868460913118 |
| C | 9.15797411655000  | 0.44290147632084  | 4.12100960049470 |
| C | 9.67981174599893  | 1.77737403270840  | 4.66599015974059 |
| C | 7.93660880214183  | -0.00799631932676 | 4.92956346992776 |
| H | 9.95045414833458  | -0.31111671580078 | 4.23256202351013 |
| H | 8.19352531853229  | -0.09125837713339 | 5.98642651862410 |
| H | 7.12546123020640  | 0.71604848440504  | 4.82691368658737 |
| H | 7.57822269461603  | -0.97969638037060 | 4.58856132289161 |
| H | 9.92109895562418  | 1.68525337766204  | 5.72576268861023 |
| H | 10.58111158459209 | 2.08032536575704  | 4.13149290418941 |
| H | 8.92586606365859  | 2.55879680543731  | 4.54834738259556 |

### Stage 3

**Table S34: *i*-C<sub>4</sub>H<sub>9</sub>-TT-AS-T-TS inclusion *trans*-C<sub>4</sub>H<sub>8</sub> in polymer. Transition state**

| Atom | x                 | y                 | z                 |
|------|-------------------|-------------------|-------------------|
| C    | 0.33481331734781  | -3.31008022651276 | -1.71024293940880 |
| Al   | 2.27815124249993  | -3.34862878941200 | -2.08622895299318 |
| Cl   | 2.51104043407227  | -3.02691526236519 | -4.37460440993990 |
| Nd   | 2.97931922300917  | -0.13271276616412 | -4.30204861991845 |
| C    | 1.80781358227283  | -0.40198860159187 | -6.88018360569852 |
| C    | 3.10786685932249  | -1.06247449688572 | -6.94227510105171 |
| C    | 4.32555062827413  | -0.46309174424699 | -6.92778766850914 |
| C    | 5.62265334066375  | -1.16828238857455 | -7.20767298528247 |
| C    | 6.85593344519891  | -0.64587313456087 | -6.42899470847852 |
| C    | 3.58734274944149  | -4.69471994748907 | -1.47187612875938 |
| Cl   | 3.13332718741057  | -1.24180190631604 | -1.63814303554495 |
| Cl   | 3.03444984647936  | 2.55890344298298  | -5.54396823569842 |
| Al   | 4.62879148202047  | 3.48492112397246  | -4.14834561170314 |
| C    | 3.75138331059257  | 4.75819917858813  | -2.92000097820347 |
| Cl   | 4.88295213256478  | 1.54233578063157  | -2.92452303958282 |
| C    | 6.22074445710156  | 3.73526283889598  | -5.29203376124488 |
| H    | -0.04056604447691 | -2.28281848500770 | -1.80783029766955 |
| H    | -0.18729407008582 | -3.88898020927295 | -2.48545000391593 |
| H    | 4.43171047436215  | -4.72193623404566 | -2.17222228595664 |
| H    | 4.00727190254231  | -4.35831962151752 | -0.51376371412466 |
| H    | 6.62747009653664  | 2.74499821156545  | -5.53988535876320 |
| H    | 5.89767954718489  | 4.17011202503088  | -6.24887373468593 |
| H    | 2.72638286411389  | 4.40489659303858  | -2.74324932146053 |
| H    | 4.25378773577012  | 4.70017022565125  | -1.94393418912388 |
| H    | 6.73767436556899  | 0.42341798473474  | -6.21287989663839 |
| H    | 7.74665699076562  | -0.73723288751347 | -7.05739706544508 |
| H    | 4.37576263174870  | 0.62380185415827  | -6.94161773160385 |
| H    | 3.08854078086449  | -2.14738986547619 | -6.99399815280743 |
| H    | 1.08626461641438  | -0.92427178441534 | -7.49495068889185 |
| H    | 1.84170632999452  | 0.65339951948196  | -7.13359914996250 |
| H    | 5.82229351889856  | -1.02549913686710 | -8.27666609471517 |
| H    | 5.50802781996948  | -2.24600438002918 | -7.06532231448049 |
| C    | 0.33180995379366  | -0.41870525453790 | -5.45301103755155 |
| C    | 0.54118962660373  | -0.12032820017061 | -4.07780655937904 |
| C    | 0.59711741404605  | 1.22953130357767  | -3.56347675588714 |
| C    | 0.97678818875822  | 1.57829182307199  | -2.31715914531451 |
| H    | -0.00055385551631 | -1.42544775443860 | -5.66275716670261 |
| H    | -0.16870924154656 | 0.34043897513461  | -6.04226340446092 |
| H    | 0.47894875431476  | -0.93568240043656 | -3.36377086986299 |
| H    | 0.41288736563557  | 2.02527432128749  | -4.28059476449005 |
| H    | 1.05158295559762  | 2.61753992370999  | -2.02956074641159 |
| H    | 1.18326535589540  | 0.83774530869665  | -1.55473914583197 |
| C    | -0.08905092877581 | -3.84689235259879 | -0.33326717429694 |

|   |                   |                   |                   |
|---|-------------------|-------------------|-------------------|
| C | -1.61153120656222 | -3.75948863101771 | -0.17215499109220 |
| C | 7.11438688911800  | -1.38942115082516 | -5.14417362515065 |
| C | 6.22645600013496  | -1.58547762858342 | -4.17938392758817 |
| C | 6.53203573347696  | -2.32243261402886 | -2.90900078101590 |
| C | 6.77375384167371  | -1.34446082107492 | -1.74810977539160 |
| C | 6.87232922856085  | -2.04958906407634 | -0.38716537180520 |
| C | 8.14597563900016  | -2.89310938790577 | -0.27313635426171 |
| C | 3.05443220420139  | -6.12488609147502 | -1.29476848957575 |
| C | 4.16827125229387  | -7.04688325583796 | -0.78438817427052 |
| C | 3.70336880771823  | 6.23058187528758  | -3.35658521599725 |
| C | 2.97096483314491  | 7.07244052692180  | -2.30452975747016 |
| C | 7.34959857918920  | 4.60365113462047  | -4.71633788987777 |
| C | 8.51714764688718  | 4.68260442639951  | -5.70729247143961 |
| C | 0.60353313389375  | -3.08658992576754 | 0.80003814750759  |
| C | 2.47752976151251  | -6.67015006372248 | -2.60309276877083 |
| C | 7.83782651995711  | 4.06679579918559  | -3.36892677792109 |
| C | 3.02813904852161  | 6.38922908381863  | -4.72064681128862 |
| C | 6.81939147637372  | -1.01056077542038 | 0.73824204100048  |
| H | 8.11430603728852  | -1.80386396988966 | -5.04006924816686 |
| H | 5.20413501852653  | -1.17047742664846 | -4.26422283578193 |
| H | 5.68606822577292  | -2.97275699033851 | -2.65656944890122 |
| H | 7.41429875000593  | -2.95228723420561 | -3.05543061098577 |
| H | 7.68781583416098  | -0.77291450630200 | -1.94248088018125 |
| H | 5.94080768136226  | -0.63477419381144 | -1.71268278982988 |
| H | 4.73225061838438  | 6.61902479815965  | -3.43795972122082 |
| H | 2.96066431125587  | 8.12428646570656  | -2.59520048507285 |
| H | 1.94062485337936  | 6.72904680647209  | -2.19322722952504 |
| H | 3.47241455654586  | 6.98218808394951  | -1.33953412094229 |
| H | 2.99550307937058  | 7.43991285720841  | -5.01342090507933 |
| H | 3.58792320792938  | 5.83526022415669  | -5.48397153132923 |
| H | 2.00539011717852  | 6.00472848310848  | -4.69253548554606 |
| H | 6.97446226290130  | 5.62889815477974  | -4.55940521333689 |
| H | 8.64508352090654  | 4.68785900610599  | -2.97733252786462 |
| H | 7.01595764769338  | 4.07075310894973  | -2.64258452607004 |
| H | 8.20587332139560  | 3.04271246530155  | -3.47135860562698 |
| H | 9.30884481794062  | 5.32401977532593  | -5.31644187934870 |
| H | 8.92876725976416  | 3.68783490553082  | -5.88880388050236 |
| H | 8.17242698960683  | 5.09361446014578  | -6.65761799000453 |
| H | 0.19316792575223  | -4.91001761587704 | -0.25345730767104 |
| H | 2.25031067939636  | -6.12482837004756 | -0.54014219172186 |
| H | 0.29339434415508  | -3.47735821455102 | 1.77053830488597  |
| H | 1.69188507676551  | -3.19434638182108 | 0.71674144891232  |
| H | 0.35635649343334  | -2.02269735647067 | 0.75913621919944  |
| H | -1.91833399058058 | -4.16559601931553 | 0.79325624637344  |
| H | -1.94148653049439 | -2.72073133786020 | -0.23629185687328 |
| H | -2.10403527450724 | -4.32889047884160 | -0.96213153656176 |

|   |                  |                   |                   |
|---|------------------|-------------------|-------------------|
| H | 2.09996324690460 | -7.68443781609415 | -2.46375424942416 |
| H | 1.64849356222036 | -6.03692235805058 | -2.94194442776015 |
| H | 3.24187799250502 | -6.68811660516804 | -3.38400628527137 |
| H | 3.78821398796123 | -8.05864988723000 | -0.63280747685792 |
| H | 4.98954563891960 | -7.08434315329102 | -1.50268654605250 |
| H | 4.55547495404344 | -6.67396109768491 | 0.16532099937387  |
| H | 6.00400559943189 | -2.71835760573359 | -0.27778811304920 |
| H | 8.20236857809356 | -3.35492509092956 | 0.71357827275590  |
| H | 8.15299074108230 | -3.68700717646906 | -1.02069990394769 |
| H | 9.03262127096804 | -2.27274080069431 | -0.41614690900569 |
| H | 6.86765132895292 | -1.50372101489699 | 1.71002199685457  |
| H | 7.65790675688134 | -0.31631715874198 | 0.65927251214020  |
| H | 5.89031653839878 | -0.44086079419817 | 0.68529893987986  |

### Stage 3

**Table S35: *i*-C<sub>4</sub>H<sub>9</sub>-CCC-AS addition *cis*-C<sub>4</sub>H<sub>8</sub> chain in polymer.**

| Atom | x                 | y                 | z                 |
|------|-------------------|-------------------|-------------------|
| C    | 0.02061223502030  | 0.47481366701943  | -0.06005958202798 |
| Al   | 0.23872417476122  | 0.01827749872845  | 1.84740710852445  |
| Cl   | 2.52032442050833  | -0.24804148406699 | 2.16534669953016  |
| Nd   | 2.85222571203607  | 2.35344643465936  | 3.31998682615242  |
| C    | 7.92284623519870  | 3.99884309646195  | 2.92407263987394  |
| C    | -0.71660691633496 | -1.29384040592653 | 2.96761258204038  |
| Cl   | 0.11259395017664  | 2.01523774381013  | 3.09838277974883  |
| Cl   | 3.30303884306452  | 3.08026412839056  | 0.58092547375490  |
| Al   | 2.32083625404874  | 5.18717487840389  | 0.79131581691544  |
| C    | 0.39200906208163  | 5.02658116011629  | 0.39790464126169  |
| Cl   | 2.46336990617702  | 5.14864016486507  | 3.11828103316719  |
| C    | 3.62685268608525  | 6.47584703491696  | 0.06432478465228  |
| H    | 0.35349317287395  | 1.50913528994736  | -0.21515674753824 |
| H    | 0.71630002849724  | -0.15034270277369 | -0.63714148557393 |
| H    | -0.08653571815250 | -1.52924362888669 | 3.83623546623617  |
| H    | -1.61710835027493 | -0.81235624596458 | 3.37372611696733  |
| H    | 4.45101425776444  | 6.57898574996520  | 0.77945804820874  |
| H    | 4.07206871021062  | 6.04105136657261  | -0.84168264990402 |
| H    | 0.07505302640673  | 3.98998672011034  | 0.57011079063724  |
| H    | -0.15436724548820 | 5.62947010872648  | 1.13689294217258  |
| H    | 8.40552356786662  | 4.74547318918181  | 3.56385741187145  |
| H    | 8.61954379434532  | 3.15944350507946  | 2.82390835396904  |
| C    | 5.72455255307457  | 0.69847125983848  | 4.86843266693715  |
| H    | 5.96072383734128  | 1.51804638229550  | 5.54445024930175  |
| H    | 6.55965309189749  | -0.00812026289996 | 4.94234329897318  |
| C    | 5.65075523524274  | 1.15759793302719  | 3.43856449309733  |
| C    | 6.01811932423146  | 2.33925867257620  | 2.91847829029753  |
| H    | 5.30283455544553  | 0.39915381906523  | 2.73773094863181  |
| H    | 5.90465354047180  | 2.46288136887948  | 1.84379109691019  |
| C    | 6.62711510894261  | 3.51467461974617  | 3.62447099170815  |
| H    | 5.90976957078672  | 4.34320749018821  | 3.63643251021860  |
| H    | 6.84554750418561  | 3.27370605291425  | 4.66483893532677  |
| C    | 3.60250766430268  | 3.16320397149378  | 5.72409566867347  |
| C    | 2.89272937278556  | 1.97955224607903  | 5.96162345076362  |
| C    | 3.14198605707789  | 0.69081016837301  | 5.51127947738642  |
| C    | 4.46250182518610  | -0.04959981650699 | 5.34221915632562  |
| H    | 3.20161099377776  | 4.09441205547996  | 6.10145729537475  |
| H    | 4.67562860314239  | 3.16329148930436  | 5.57203137465127  |
| H    | 1.86445662519706  | 2.13423131272679  | 6.29593624681913  |
| H    | 2.31725538681980  | -0.00196264976461 | 5.64905307559543  |
| H    | 4.70456999255768  | -0.50613135210036 | 6.31041388296285  |
| H    | 4.28880569598368  | -0.88715224616955 | 4.65955920977086  |
| C    | 7.64449937964096  | 4.59319364449506  | 1.56617322474616  |

|   |                   |                   |                   |
|---|-------------------|-------------------|-------------------|
| C | 7.25248582758001  | 5.84267045134590  | 1.34187258461407  |
| H | 7.75702984088828  | 3.91325572619655  | 0.72514805284750  |
| H | 7.06861469949632  | 6.16300708651383  | 0.31825516778453  |
| C | 7.03782156719474  | 6.91045703802514  | 2.37888837765783  |
| C | 7.71257720265340  | 8.22558381833749  | 1.96048203132196  |
| H | 5.95954472960893  | 7.07593996179775  | 2.49256881185561  |
| H | 7.42386838555842  | 6.59568762248723  | 3.35343212904363  |
| H | 8.76864821262756  | 8.02373331609206  | 1.75071010251622  |
| H | 7.25677253758517  | 8.59131255265808  | 1.03378857904465  |
| C | -1.39092871792143 | 0.30503413689719  | -0.63633004873552 |
| C | -1.39195089153201 | 0.60214092853870  | -2.14037427157363 |
| C | -2.39754409621226 | 1.20483118600591  | 0.08192594588916  |
| C | -1.12850289104232 | -2.59968265648244 | 2.27215301406266  |
| C | -1.83578439221845 | -3.53026470977620 | 3.26461096247875  |
| C | 0.07676830805027  | -3.30861201853016 | 1.65074802613491  |
| C | -0.03987432550213 | 5.46123766184913  | -1.00799271709929 |
| C | -1.56662613172672 | 5.41120250951015  | -1.13757326205549 |
| C | 3.08663740249297  | 7.87219191596798  | -0.27444984877387 |
| C | 4.21219218967215  | 8.75700888440705  | -0.82378063525008 |
| C | 2.44114922494065  | 8.53430564994950  | 0.94432972653583  |
| C | 0.61535219311209  | 4.59359995421506  | -2.08326842121524 |
| H | 0.26991978317193  | 6.50694471609752  | -1.17845178460783 |
| H | -1.87414878137750 | 5.70570874679730  | -2.14228738063351 |
| H | -1.93355246311239 | 4.40241300387854  | -0.93958529317718 |
| H | -2.02485893733971 | 6.09194985872601  | -0.41833581895886 |
| H | 0.31439828989921  | 4.92106877449238  | -3.07954465758684 |
| H | 1.70745579137494  | 4.66351571882706  | -2.00994135973424 |
| H | 0.32604679997893  | 3.54750585536850  | -1.95868524163569 |
| H | 2.31946062683213  | 7.78534331499850  | -1.06167832491043 |
| H | 2.06976008992309  | 9.52832007987084  | 0.69047735593109  |
| H | 1.59682236293239  | 7.92961929797622  | 1.29699010858521  |
| H | 3.16217018633608  | 8.63068357048918  | 1.75940342047717  |
| H | 3.82568725645037  | 9.74036059502387  | -1.09669487056800 |
| H | 4.99560570854245  | 8.88455291315830  | -0.07465547038318 |
| H | 4.65214357498081  | 8.29603004413870  | -1.70955087302656 |
| H | -1.71462743870746 | -0.74215399576563 | -0.50573038072297 |
| H | -1.84237009237839 | -2.36989390860433 | 1.46381417209842  |
| H | -3.39730628736679 | 1.07456064196203  | -0.33502589238011 |
| H | -2.43147366849760 | 0.95621761581747  | 1.14955556721474  |
| H | -2.11176913626749 | 2.25418864931546  | -0.02111873906553 |
| H | -2.39545649721599 | 0.48399742091985  | -2.55249793714032 |
| H | -1.05455534605985 | 1.62338254686292  | -2.32719070657899 |
| H | -0.71899461852371 | -0.08377781898382 | -2.65747970246253 |
| H | -0.23192740343680 | -4.23385616017291 | 1.16170168942255  |
| H | 0.54686820352963  | -2.66140244709431 | 0.89978268108638  |
| H | 0.81963531295381  | -3.55059939394675 | 2.41499463430919  |

|   |                   |                   |                  |
|---|-------------------|-------------------|------------------|
| H | -2.15567615739106 | -4.44693995195922 | 2.76644386843586 |
| H | -1.16465655236714 | -3.79204970537278 | 4.08486024981611 |
| H | -2.71440149727888 | -3.03391854315976 | 3.67984867292930 |
| C | 7.62477703681251  | 9.31291694011122  | 3.04470384890778 |
| C | 8.51952924926633  | 10.49826214073971 | 2.66273112111407 |
| C | 6.18483501197316  | 9.79057987435875  | 3.26074990469463 |
| H | 7.99701261830088  | 8.89189927006549  | 3.99017927861928 |
| H | 6.16200061162206  | 10.58188360276832 | 4.01135663389585 |
| H | 5.76698708129169  | 10.18386405937511 | 2.33233307100535 |
| H | 5.55236538607667  | 8.97364485568850  | 3.60961573439882 |
| H | 8.48168753785561  | 11.26529912730514 | 3.43741980759671 |
| H | 9.55455098799457  | 10.17281349021923 | 2.54959092767113 |
| H | 8.18961151195117  | 10.94014185232301 | 1.72089835916642 |



### Stage 3

**Table S36: *i*-C<sub>4</sub>H<sub>9</sub>-CCT-AS addition *trans*-C<sub>4</sub>H<sub>8</sub> chain in polymer.**

| Atom | x                 | y                 | z                 |
|------|-------------------|-------------------|-------------------|
| C    | 1.04358818615441  | 6.65148977216350  | 1.38173139116249  |
| Al   | 0.77632092014199  | 5.83679946332749  | 3.15766885917763  |
| Cl   | 0.67317726324977  | 3.52439239689895  | 2.75308137332640  |
| Nd   | 3.30683742993781  | 3.01299321726015  | 3.63377721241763  |
| C    | 5.43306930575757  | -1.27465417957013 | 1.13515273839868  |
| C    | -0.51972973537291 | 6.24091399698355  | 4.59015897480884  |
| Cl   | 2.83030139907015  | 5.72018264924953  | 4.23402146194487  |
| Cl   | 4.05252874061687  | 3.99897831094735  | 1.02192737221623  |
| Al   | 6.21169259334928  | 4.52177262800506  | 1.67119439173739  |
| C    | 6.21021684723572  | 6.32987234624123  | 2.46154205574662  |
| Cl   | 6.11280385602653  | 3.10575728240473  | 3.58199392846357  |
| C    | 7.41013783950955  | 3.73706408955288  | 0.31348838943990  |
| H    | 2.06764060510566  | 6.41730791256503  | 1.06314612532226  |
| H    | 0.38479587791430  | 6.14891651205024  | 0.65995765499367  |
| H    | -0.62143435642615 | 5.34771219901894  | 5.22181663811011  |
| H    | -0.08388401055103 | 7.01419954631394  | 5.23829924425249  |
| H    | 7.62408064696718  | 2.69307665548418  | 0.56724662291367  |
| H    | 6.85505916993592  | 3.70693367864069  | -0.63453655957380 |
| H    | 5.21150245841862  | 6.51491981894249  | 2.87554156268207  |
| H    | 6.89617689740048  | 6.33478356546921  | 3.32020824960281  |
| H    | 6.08455806767549  | -2.02335774302580 | 1.59809198805795  |
| H    | 4.65052856504074  | -1.81828859717499 | 0.59409344480473  |
| C    | 1.74699386246544  | -0.63791323379681 | 3.12522752663837  |
| H    | 2.46464819333459  | -1.41519740311058 | 3.39164362253427  |
| H    | 0.89180424227699  | -1.14396628178739 | 2.66769913621752  |
| C    | 2.34702139682999  | 0.30867549800260  | 2.12128792991343  |
| C    | 3.63783339159956  | 0.40590866960129  | 1.76276400407097  |
| H    | 1.63956167293927  | 0.96987757093794  | 1.62417962144809  |
| H    | 3.89177408356605  | 1.12238672041967  | 0.98462244605671  |
| C    | 4.78345614933770  | -0.42658679503370 | 2.26083141242796  |
| H    | 5.54985859845347  | 0.22977312355208  | 2.68594132482690  |
| H    | 4.46168080916764  | -1.08873024983877 | 3.06454244038449  |
| C    | 3.26244667190769  | 2.83395572700593  | 6.25892161562496  |
| C    | 2.23625579215091  | 1.97802708238475  | 5.86024236362246  |
| C    | 2.40490200972524  | 0.90954147958377  | 4.99389596222829  |
| C    | 1.28740527155947  | 0.07861529523597  | 4.41163925928787  |
| H    | 3.04778399900954  | 3.69816081610416  | 6.87143509763495  |
| H    | 4.28477927674420  | 2.45814992418142  | 6.32251120212942  |
| H    | 1.21513027018020  | 2.32890458629652  | 6.01502328571107  |
| H    | 3.39662524452633  | 0.44574823972942  | 4.96449045657262  |
| H    | 0.43121888226565  | 0.72217916274575  | 4.18850032216378  |
| H    | 0.93219876439617  | -0.67988590003394 | 5.11985998351644  |
| C    | 6.22900879903789  | -0.43987745366464 | 0.16557613739898  |

|   |                   |                   |                   |
|---|-------------------|-------------------|-------------------|
| C | 7.53218370217664  | -0.19110767497232 | 0.24956152732593  |
| H | 5.66183533993136  | -0.02008956425341 | -0.66264912068103 |
| H | 8.00127129083034  | 0.42372382027248  | -0.51544968664677 |
| C | 8.46127672334667  | -0.65542049469419 | 1.33665179585965  |
| C | 8.82233966962877  | 0.51853548569130  | 2.26272774187688  |
| H | 8.00565054736214  | -1.45960473390541 | 1.92037319098270  |
| H | 9.37974582891372  | -1.04903205096461 | 0.88742413092566  |
| H | 9.43545855897343  | 1.22725418219474  | 1.69549883815958  |
| H | 7.90429821464568  | 1.03937762470926  | 2.55910009762765  |
| C | 0.81348303344706  | 8.16528689052905  | 1.28518455889207  |
| C | 1.10711391178495  | 8.65449343591846  | -0.13812489968198 |
| C | 1.67168245237396  | 8.93245824770001  | 2.29289747849976  |
| C | -1.91272661007619 | 6.70471004256628  | 4.14106192517635  |
| C | -2.80443927619818 | 6.96224293470706  | 5.36200243290688  |
| C | -2.57271286811541 | 5.68318213475986  | 3.21264632308224  |
| C | 6.58456578153552  | 7.48734667272417  | 1.52752415022853  |
| C | 6.48274035972241  | 8.82171988092931  | 2.27637681687249  |
| C | 8.73183735725910  | 4.48410395411131  | 0.08677545287856  |
| C | 9.51370995579209  | 3.84750630613144  | -1.06838846002712 |
| C | 9.59160805901186  | 4.50479197546764  | 1.35174034615240  |
| C | 5.69814988753303  | 7.51366071319802  | 0.28120291656659  |
| H | 7.63109239607402  | 7.36874787564067  | 1.19993201928538  |
| H | 6.78532977365723  | 9.64651591206414  | 1.62902746693705  |
| H | 5.45660639862303  | 8.99375365351403  | 2.60719015833218  |
| H | 7.13240386389627  | 8.80901457043483  | 3.15291548427112  |
| H | 5.97538926419428  | 8.34232303742197  | -0.37204872501536 |
| H | 5.80971236350067  | 6.57764590686340  | -0.28010152399009 |
| H | 4.64751809923476  | 7.62714170754310  | 0.55985079714300  |
| H | 8.51535622984433  | 5.52816089570228  | -0.19592163269424 |
| H | 10.48835415833605 | 5.10678723865828  | 1.19666038612961  |
| H | 9.02634049021563  | 4.93277073364962  | 2.18821482733273  |
| H | 9.89790963122398  | 3.49288324469647  | 1.62360600830241  |
| H | 10.44212513970346 | 4.39279355588178  | -1.24598733910846 |
| H | 9.75643064097073  | 2.80915241786206  | -0.83571895515311 |
| H | 8.91616020502857  | 3.86838260941267  | -1.98115884036614 |
| H | -0.24558752348895 | 8.38585047290826  | 1.50200012554601  |
| H | -1.81826688110503 | 7.65552376856683  | 3.59061625904055  |
| H | 1.49457699351131  | 10.00592043029650 | 2.21012167862479  |
| H | 1.42381547638544  | 8.61917339829817  | 3.31468814218018  |
| H | 2.73368823356592  | 8.74204527924817  | 2.11968931504611  |
| H | 0.91518291551740  | 9.72559041958605  | -0.22053841721580 |
| H | 2.15044598604750  | 8.46389818357901  | -0.39673299958403 |
| H | 0.47103401865399  | 8.12944747951188  | -0.85248955453621 |
| H | -3.56198590989640 | 6.02634312818004  | 2.90578107847034  |
| H | -1.96115123098241 | 5.54336685306308  | 2.31282703895584  |
| H | -2.67951103895015 | 4.71784870451450  | 3.71373955440205  |

|   |                   |                   |                  |
|---|-------------------|-------------------|------------------|
| H | -3.78487565235177 | 7.32484350706180  | 5.04887721051793 |
| H | -2.93682683600315 | 6.04357303127996  | 5.93663547662668 |
| H | -2.34494377712965 | 7.71218746299884  | 6.00794159941623 |
| C | 9.59180701766221  | 0.08765543145063  | 3.52134500081290 |
| C | 10.24661361934289 | 1.31052709584048  | 4.17397168782291 |
| C | 8.67301680134149  | -0.61294902792113 | 4.52838169335031 |
| H | 10.38663620607611 | -0.61255114181431 | 3.22602945623851 |
| H | 9.24095572319872  | -0.90934906294430 | 5.41134846673241 |
| H | 7.86880598056638  | 0.05531893763263  | 4.84272681711890 |
| H | 8.22825492016781  | -1.50860552544591 | 4.09363831652073 |
| H | 10.78815245750113 | 1.01525941283871  | 5.07371483334476 |
| H | 10.95195012056212 | 1.77677798575598  | 3.48477174937915 |
| H | 9.49102060679263  | 2.04861493608433  | 4.45132331438937 |

### Stage 3

**Table S37: *i*-C<sub>4</sub>H<sub>9</sub>-TTT-AS addition *trans*-C<sub>4</sub>H<sub>8</sub> chain in polymer.**

| Atom | x                 | y                 | z                 |
|------|-------------------|-------------------|-------------------|
| C    | 0.44667215934416  | -3.79937236542798 | -2.08820234673187 |
| Al   | 2.37898350824686  | -3.40180542589102 | -2.00427439508371 |
| Cl   | 2.90556007352252  | -2.86142545727964 | -4.20431901564887 |
| Nd   | 3.02936265015496  | -0.00640128768432 | -3.84254723017458 |
| C    | 0.74374081125641  | -0.25064133681005 | -6.92607048839387 |
| C    | 1.98564709327586  | -1.09531712417262 | -6.98245069325077 |
| C    | 3.20404595296789  | -0.68340755266167 | -7.34508146879465 |
| C    | 4.37940562831207  | -1.57528873806476 | -7.62725995926279 |
| C    | 5.69589976226040  | -1.18541887147481 | -6.91454783247229 |
| C    | 3.86109795365414  | -4.44555139637857 | -1.22368693524666 |
| Cl   | 2.68305062315179  | -1.22301775118880 | -1.26763303184425 |
| Cl   | 4.07031359556875  | 2.05384916749072  | -5.48322713007434 |
| Al   | 5.08964761111705  | 3.28573724688564  | -3.76283083004731 |
| C    | 3.87752199234214  | 4.79316921664222  | -3.37020238576820 |
| Cl   | 4.69329405386081  | 1.65531739045307  | -2.17667457651700 |
| C    | 7.01214375683537  | 3.30164668324882  | -4.21552016047213 |
| H    | -0.10304023423345 | -2.85476903249441 | -2.20246163528274 |
| H    | 0.26200661274759  | -4.36174596064654 | -3.01470320304936 |
| H    | 4.79356962750470  | -4.14166100236592 | -1.71601005527668 |
| H    | 3.97582029767971  | -4.15577979071719 | -0.16969621158384 |
| H    | 7.43101554768920  | 2.30781891552295  | -4.01096565634436 |
| H    | 7.11834412394522  | 3.45194799957368  | -5.29900807534267 |
| H    | 2.85508629595615  | 4.47750022209650  | -3.61658888029455 |
| H    | 3.87737054001793  | 4.98104212001545  | -2.28745563079630 |
| H    | 5.84390796605165  | -0.09986872102528 | -6.93729496029466 |
| H    | 6.53466352411298  | -1.63863680683598 | -7.45646229367697 |
| H    | 3.35572455419293  | 0.37159113143676  | -7.55775509255771 |
| H    | 1.83630183483855  | -2.15444231842300 | -6.78579667581464 |
| H    | 0.15568352799904  | -0.45983096954303 | -7.82838830812483 |
| H    | 1.00482003670383  | 0.81056671492086  | -6.97450680310812 |
| H    | 4.56085180512171  | -1.52857213113433 | -8.70755674971749 |
| H    | 4.12549545702332  | -2.61487601749129 | -7.40447047836981 |
| C    | -0.13608629397146 | -0.54074823484608 | -5.69772051436322 |
| C    | 0.45553196110080  | -0.08514561045628 | -4.37783279220646 |
| C    | 0.68336538183558  | 1.25528435575063  | -4.07156461106923 |
| C    | 1.26658950299129  | 1.70740194711880  | -2.89453679228849 |
| H    | -0.31611758215029 | -1.61764438732882 | -5.64797840139497 |
| H    | -1.11763848408837 | -0.07814745626317 | -5.85270115188617 |
| H    | 0.31213796857784  | -0.76505560330919 | -3.53508293987259 |
| H    | 0.64132940013655  | 1.96289708438669  | -4.89976940793130 |
| H    | 1.52455292210474  | 2.74971551963718  | -2.77650978578108 |
| H    | 1.15067208077659  | 1.14330832121283  | -1.97275237741695 |
| C    | -0.15186009196069 | -4.58457541123800 | -0.91246238672451 |

|   |                   |                   |                   |
|---|-------------------|-------------------|-------------------|
| C | -1.64530908960855 | -4.83933735078606 | -1.15047705693486 |
| C | 5.77201773277861  | -1.68882276951923 | -5.50026473753978 |
| C | 6.07987468172179  | -0.94541734036192 | -4.43961917295847 |
| C | 6.26490834380031  | -1.50996432707515 | -3.05281173469794 |
| C | 7.52491802931954  | -0.95663164249358 | -2.37774942931397 |
| C | 7.59768803458580  | -1.32200851751986 | -0.88598139802319 |
| C | 7.87328564541617  | -2.81492745935738 | -0.68064876410972 |
| C | 3.73611624082281  | -5.97375120181584 | -1.30215919689271 |
| C | 4.96080837301235  | -6.63893140021787 | -0.66206086224611 |
| C | 4.17484501603273  | 6.11270692584676  | -4.09850579669340 |
| C | 3.13128865133574  | 7.17136469944777  | -3.72133326037245 |
| C | 7.86055627659615  | 4.35673990964715  | -3.49086255572684 |
| C | 9.33222039886998  | 4.22628277714035  | -3.90146805379777 |
| C | 0.05501767379934  | -3.84772874115026 | 0.41212408331686  |
| C | 3.57511148151362  | -6.44883496216157 | -2.74787389407751 |
| C | 7.72560616317592  | 4.23840457043753  | -1.97133842278693 |
| C | 4.20272360580907  | 5.92377255187864  | -5.61697130837033 |
| C | 8.67964113388352  | -0.48350232535520 | -0.19688938514905 |
| H | 5.61087638072725  | -2.76040287124311 | -5.38551381130583 |
| H | 6.31458218749918  | 0.11526410021658  | -4.55704929859042 |
| H | 5.39992674528567  | -1.24338023404803 | -2.42512820349107 |
| H | 6.30913724047782  | -2.60304068870565 | -3.10616362951526 |
| H | 8.41415714230400  | -1.32584438971672 | -2.89927870136910 |
| H | 7.51691799571458  | 0.13612129699242  | -2.46900541822690 |
| H | 5.16206273324494  | 6.48845885761390  | -3.78215233714081 |
| H | 3.35483102564924  | 8.11989890534097  | -4.21237271729109 |
| H | 2.13427769287572  | 6.84591269269762  | -4.02463218948951 |
| H | 3.13131702437883  | 7.32841651999214  | -2.64156014456235 |
| H | 4.40913127947807  | 6.87106386528069  | -6.11756820976735 |
| H | 4.98674000536739  | 5.20918077882908  | -5.89463246464700 |
| H | 3.24319720096758  | 5.54332957126764  | -5.97628687745873 |
| H | 7.51877415749743  | 5.36274382341230  | -3.78641805770543 |
| H | 8.32697481476854  | 4.99934788904793  | -1.47147668216834 |
| H | 6.67812119032391  | 4.37634490789220  | -1.67500576552714 |
| H | 8.05646925813137  | 3.25470879354706  | -1.62977623974066 |
| H | 9.93490151238175  | 4.99291770607246  | -3.41163780904784 |
| H | 9.71839190041111  | 3.24420394745205  | -3.62188137789302 |
| H | 9.42984695685867  | 4.34291145713716  | -4.98205138853951 |
| H | 0.34587427345405  | -5.56596875798630 | -0.83949932754903 |
| H | 2.84686478900650  | -6.29659893034037 | -0.73535998370081 |
| H | -0.37708592026121 | -4.41413105296851 | 1.23856090603058  |
| H | 1.12673468964823  | -3.71711055155812 | 0.60517285328620  |
| H | -0.41513379903172 | -2.86161873404565 | 0.38272827428493  |
| H | -2.06978874597356 | -5.42007962309305 | -0.32991493145674 |
| H | -2.18488056514938 | -3.89344273523845 | -1.22747829377325 |
| H | -1.78525253006878 | -5.39464294776779 | -2.07943480787139 |

|   |                  |                   |                   |
|---|------------------|-------------------|-------------------|
| H | 3.49486241627083 | -7.53631407256087 | -2.78823567480848 |
| H | 2.66599652064537 | -6.01905027680595 | -3.18593457776011 |
| H | 4.43124306379817 | -6.14085452321031 | -3.35330092351333 |
| H | 4.85978981407523 | -7.72534541877231 | -0.68321982906103 |
| H | 5.86903281596508 | -6.36063000959926 | -1.19995255733914 |
| H | 5.06017834191552 | -6.31797480074335 | 0.37614725803088  |
| H | 6.62900330538100 | -1.08080898807038 | -0.42239826362551 |
| H | 7.93464212928617 | -3.04151476597513 | 0.38466611378239  |
| H | 7.07314387122763 | -3.41899554247344 | -1.11060192123762 |
| H | 8.81548321234011 | -3.10196732579670 | -1.15093162108564 |
| H | 8.73169111404993 | -0.73190002182643 | 0.86389767075960  |
| H | 9.65650331646702 | -0.67173890258358 | -0.64574647723852 |
| H | 8.45283538417057 | 0.57956449851301  | -0.29142567994869 |

# Stage 4

**Table S38: *i*-C<sub>4</sub>H<sub>9</sub>-CCC-AS-T**

| Atom | x                 | y                 | z                 |
|------|-------------------|-------------------|-------------------|
| C    | -0.47579203782578 | 0.221464295555652 | -0.16963438878247 |
| Al   | -0.31319464943558 | -0.35407897693406 | 1.71117109522739  |
| Cl   | 1.92581087863905  | -0.99716482138466 | 2.00236489176485  |
| Nd   | 2.83975064199538  | 1.41575307750259  | 3.12366714003562  |
| C    | -1.43224927233779 | -1.61185299228471 | 2.74699743187705  |
| Cl   | -0.05949917063792 | 1.51359702254120  | 3.04006309683593  |
| Cl   | 2.65634558261559  | 2.50480732482138  | 0.51534035932498  |
| Al   | 2.14026228067785  | 4.67190691847301  | 1.17146587007951  |
| C    | 0.21249343334423  | 4.97797573877701  | 0.88451760507494  |
| Cl   | 2.32115645696435  | 4.19687705264397  | 3.47007934293615  |
| C    | 3.73000419688360  | 5.74349140087495  | 0.68287384718893  |
| H    | 0.06277395257480  | 1.17191118178518  | -0.27411723137596 |
| H    | 0.06046811304740  | -0.49574886995462 | -0.80664808600157 |
| H    | -0.82035126373531 | -2.05543774009577 | 3.54441540285284  |
| H    | -2.21362373984195 | -1.03186140735823 | 3.25818519207867  |
| H    | 4.42848876572871  | 5.73848234555647  | 1.53048337661413  |
| H    | 4.24740435296136  | 5.21972543876535  | -0.13272386316198 |
| H    | -0.28818135031858 | 4.00348134129941  | 0.95097810958627  |
| H    | -0.17412766443955 | 5.56793035579407  | 1.72718640512598  |
| C    | 6.44339812171436  | 2.88915552727207  | 3.89317879797455  |
| H    | 7.04046296699474  | 2.03998944830669  | 4.24595014161200  |
| H    | 7.11835205266540  | 3.74954351922149  | 3.83385572060021  |
| C    | 4.72771787805830  | 0.05078481135323  | 4.29904665636089  |
| C    | 5.15962812207562  | 0.10401596175797  | 2.95358860153633  |
| C    | 5.41065167770491  | 1.19500419125583  | 2.14889351520804  |
| C    | 5.90631841503088  | 2.59922509698271  | 2.48100292344349  |
| H    | 4.52685629306761  | -0.93091646510574 | 4.71179986615193  |
| H    | 5.09941936561992  | 0.76192451501215  | 5.02999444035994  |
| H    | 4.99881450975216  | -0.81679221826035 | 2.39424684138867  |
| H    | 5.47668032344870  | 0.97657688079963  | 1.08880885131252  |
| H    | 6.71620934927648  | 2.79283507643590  | 1.77107927608203  |
| H    | 5.15588252369687  | 3.35808485580344  | 2.21536585853052  |
| C    | 1.76132247861446  | 0.26089424525745  | 5.86091517909089  |
| C    | 1.57779107512930  | 1.54969061645763  | 6.19113163083973  |
| C    | 2.39095753134760  | 2.27097699482786  | 7.15627564172571  |
| C    | 2.17840380665571  | 3.54711002904847  | 7.49479927877749  |
| H    | 2.78187312216312  | 4.04305705157283  | 8.24397685274589  |
| H    | 1.38536865270841  | 4.12907565020909  | 7.03892493768348  |
| H    | 3.19531989073363  | 1.71475721822301  | 7.62992612461860  |
| H    | 0.75535347885311  | 2.09847524867716  | 5.73954804900758  |
| H    | 1.08432543904359  | -0.24751806507933 | 5.18418610142316  |
| H    | 2.55556663566561  | -0.32789466763434 | 6.30028354187056  |
| C    | 6.58301391374956  | 6.04533815216997  | 6.73591510152825  |

|   |                   |                   |                   |
|---|-------------------|-------------------|-------------------|
| H | 5.75962567881781  | 6.21143670648468  | 7.43654491955075  |
| H | 7.49568355235569  | 6.44377471074697  | 7.19025433673846  |
| C | 5.36618886464471  | 3.20409998698893  | 4.90027526810284  |
| C | 5.51168036976036  | 3.89243781942094  | 6.02472837589795  |
| H | 4.36811537044673  | 2.81650642829063  | 4.64920806729118  |
| H | 4.64130817454068  | 4.04345074425704  | 6.65705869839724  |
| C | 6.77209989976282  | 4.52601976272248  | 6.53389442751550  |
| H | 7.02528866953660  | 4.08077378591691  | 7.50220090420813  |
| H | 7.61056445891273  | 4.34880242776311  | 5.85457780953848  |
| C | 6.33916656118372  | 6.74311034197823  | 5.42539765281347  |
| C | 5.16579064658191  | 7.12321266010128  | 4.93264693237438  |
| H | 7.23547613787929  | 6.90714056674225  | 4.83143012781628  |
| H | 5.14343903138563  | 7.60810772343322  | 3.95815756239688  |
| C | 3.81613853858179  | 6.96047778764488  | 5.57115574442548  |
| C | 3.04552909622177  | 8.28860002634548  | 5.59699624722738  |
| H | 3.25061103399136  | 6.22633692865246  | 4.98555839978035  |
| H | 3.90237732088633  | 6.57170854413922  | 6.58993629595399  |
| H | 3.60626389048500  | 9.00460011340284  | 6.20781217498053  |
| H | 2.98535987961158  | 8.69906541088057  | 4.58269260041312  |
| C | -1.90290092519138 | 0.38417449649996  | -0.70743918462176 |
| C | -1.86721672114775 | 0.90217322048822  | -2.15033367678675 |
| C | -2.73560193673783 | 1.32279296825084  | 0.16770777922125  |
| C | -2.10029914734998 | -2.73725019709532 | 1.94492236000693  |
| C | -2.94879627756086 | -3.61596089410915 | 2.87242086280356  |
| C | -1.06568070164223 | -3.59186032441428 | 1.20985016127599  |
| C | -0.18904133391960 | 5.66839464588897  | -0.42484245408043 |
| C | -1.71593993569803 | 5.76313674315017  | -0.52740695717679 |
| C | 3.47871995771247  | 7.19573271217174  | 0.25156856077253  |
| C | 4.79865378958452  | 7.86793389081000  | -0.14540933658077 |
| C | 2.79339990072942  | 7.99903416157743  | 1.35757321606112  |
| C | 0.37463262634886  | 4.93808989427105  | -1.64502499862765 |
| H | 0.21017841920894  | 6.69648956021518  | -0.42829914428825 |
| H | -2.00482734779030 | 6.32086392878661  | -1.41981591913163 |
| H | -2.15244412836067 | 4.76401577665529  | -0.58246774049212 |
| H | -2.11960675686368 | 6.27236804143364  | 0.34905566338475  |
| H | 0.08661574696020  | 5.44797766211357  | -2.56562520820324 |
| H | 1.47024476104257  | 4.90883635564319  | -1.59361333611761 |
| H | 0.00179921785579  | 3.91168492650775  | -1.68582354229029 |
| H | 2.82090691523047  | 7.20403646491091  | -0.63349396034870 |
| H | 2.58176997353455  | 9.01499127740058  | 1.02069536247795  |
| H | 1.84694411339388  | 7.52268198365776  | 1.63791440922457  |
| H | 3.42971596719043  | 8.05380583023172  | 2.24321471023307  |
| H | 4.62142632587059  | 8.89499359714682  | -0.46889923338576 |
| H | 5.48792621697946  | 7.88051599010422  | 0.70106660159925  |
| H | 5.26549748761167  | 7.31942543113679  | -0.96512446579761 |
| H | -2.39991131789792 | -0.60073779119412 | -0.71896788943342 |



|   |                   |                   |                   |
|---|-------------------|-------------------|-------------------|
| H | -2.77653810533674 | -2.29695193111606 | 1.19329114754773  |
| H | -3.74436648162428 | 1.42907551640306  | -0.23406353385569 |
| H | -2.80979363020428 | 0.92130506667467  | 1.18594464782435  |
| H | -2.27686129099875 | 2.31337285915555  | 0.21872080009256  |
| H | -2.87871656251095 | 0.98469255151643  | -2.55132212414182 |
| H | -1.39442298103423 | 1.88561729904111  | -2.18736930286043 |
| H | -1.29554988580142 | 0.21856464322661  | -2.77983895690440 |
| H | -1.55545557973391 | -4.38641633554639 | 0.64489486674620  |
| H | -0.49565316981299 | -2.97066459662392 | 0.50810209528833  |
| H | -0.36778348232968 | -4.04697370424487 | 1.91690095900361  |
| H | -3.45025021869942 | -4.39914033168798 | 2.30153194639906  |
| H | -2.32040291453123 | -4.08266096588878 | 3.63314053447622  |
| H | -3.70582347070638 | -3.00889756976302 | 3.37145017929567  |
| C | 1.62756243632782  | 8.13705511190043  | 6.17502165187416  |
| C | 1.05803008323817  | 9.51608029746235  | 6.52863639476097  |
| C | 0.69008326447812  | 7.41848373914265  | 5.19885650048212  |
| H | 1.68874080591640  | 7.54401624331198  | 7.09929582165644  |
| H | -0.30308543046274 | 7.31763437103775  | 5.63857980274902  |
| H | 0.60043478289521  | 7.98334171449131  | 4.26804947834884  |
| H | 1.06193584883984  | 6.42002472669327  | 4.96579556308832  |
| H | 0.05673152791573  | 9.41447165026758  | 6.94955655798749  |
| H | 1.69251519672663  | 10.01320016466851 | 7.26367261371310  |
| H | 0.99771802813755  | 10.14651995878110 | 5.63960963415210  |

# Stage 4

**Table S39: *i*-C<sub>4</sub>H<sub>9</sub>-CCC-AS-C**

| Atom | x                 | y                 | z                 |
|------|-------------------|-------------------|-------------------|
| C    | 0.65372298354537  | -0.76621837667270 | -0.62274461433985 |
| Al   | 0.06199979382860  | -1.03986147942716 | 1.23966330691277  |
| Cl   | 1.88048129283162  | -0.31246951411552 | 2.52424239312073  |
| Nd   | 0.83329379967805  | 2.21926728196413  | 3.14769807277651  |
| C    | -0.67765393270089 | -2.62702492626819 | 2.15678920728392  |
| Cl   | -1.29732692991539 | 0.73123821456880  | 1.84986986461635  |
| Cl   | 1.17976002975868  | 3.25368400771875  | 0.52581610657956  |
| Al   | -0.54454744222765 | 4.78863993826016  | 0.69668095189045  |
| C    | -2.11774406130898 | 4.08364293333705  | -0.25918580633962 |
| Cl   | -1.02346025703784 | 4.32791068893513  | 2.96844324706019  |
| C    | 0.35567619573460  | 6.54574981919239  | 0.65406169504064  |
| H    | 0.66964594145134  | 0.31698860544637  | -0.80481714134241 |
| H    | 1.69800471316618  | -1.09824846266899 | -0.70656692465611 |
| H    | -0.48432628269531 | -2.51629317759795 | 3.23304771783882  |
| H    | -1.77122780000695 | -2.61974304771101 | 2.04851190488407  |
| H    | 0.91176766325375  | 6.66231376941168  | 1.59431552861922  |
| H    | 1.11664771398469  | 6.51854598868105  | -0.13862740847533 |
| H    | -2.10533087885911 | 2.99266966343002  | -0.13341281245944 |
| H    | -3.02693039301005 | 4.43306292620778  | 0.24958004594736  |
| C    | 3.78032238497205  | 5.63034481236933  | 4.01792812319784  |
| H    | 4.75828984644532  | 5.59479715370992  | 3.52832677843581  |
| H    | 3.38094173678443  | 6.64180271581420  | 3.87539069344062  |
| C    | 2.24291422693286  | 2.41708045376717  | 5.35555780750891  |
| C    | 3.22672521964939  | 2.34257404669947  | 4.35730205203069  |
| C    | 3.34040166539343  | 3.20693918812880  | 3.28325748472710  |
| C    | 2.82970924941813  | 4.62683604426659  | 3.30105452583997  |
| H    | 2.21603123301218  | 1.64842693552654  | 6.11681964428236  |
| H    | 1.87257110373108  | 3.38409504753244  | 5.68774392195813  |
| H    | 3.77202844014904  | 1.40501263720761  | 4.27756547132421  |
| H    | 4.06037984100064  | 2.96903217295261  | 2.50935123532690  |
| H    | 2.67825310485733  | 4.97262231674940  | 2.27842717700062  |
| H    | 1.84869810938234  | 4.71606285752445  | 3.79558664125212  |
| C    | -0.70039208848679 | 0.55186005280288  | 5.35727323347977  |
| C    | -1.46248263881721 | 1.65546141318835  | 5.36776570563428  |
| C    | -1.37940083210867 | 2.76012477411643  | 6.32930449503182  |
| C    | -0.94672138650043 | 2.65751990965208  | 7.58644637168780  |
| H    | -0.90804416222621 | 3.52089183604401  | 8.23807744893662  |
| H    | -0.63341652838820 | 1.71023580980414  | 8.00962983918292  |
| H    | -1.72834153824511 | 3.72242577182054  | 5.96744032983890  |
| H    | -2.21671316384954 | 1.76108303109596  | 4.59197094226503  |
| H    | -0.87834817358091 | -0.23387209522573 | 4.63379387690201  |
| H    | 0.09114048482474  | 0.39332359726831  | 6.07779922733811  |
| C    | 7.37521102478929  | 4.95374521748635  | 5.55104618411622  |

|   |                   |                   |                   |
|---|-------------------|-------------------|-------------------|
| H | 7.53312268199027  | 5.18278644566982  | 6.60825235973480  |
| H | 8.22849901888910  | 4.35940395216363  | 5.20678211943969  |
| C | 3.92270195094284  | 5.36832691160324  | 5.49033654517850  |
| C | 4.91868474277922  | 4.71209710148047  | 6.07867635661556  |
| H | 3.11380114473739  | 5.76062463976779  | 6.10267145937398  |
| H | 4.91194880721551  | 4.61423386220153  | 7.16151509934624  |
| C | 6.10487382576026  | 4.08611393296904  | 5.40248770965041  |
| H | 6.29938221014446  | 3.11525042503710  | 5.86943990454832  |
| H | 5.90792186694597  | 3.91205877530227  | 4.34054639415174  |
| C | 7.28861929880961  | 6.20106678430700  | 4.71760653330913  |
| C | 7.25786621749544  | 7.45730023260604  | 5.14840451085545  |
| H | 7.23356805153298  | 6.01419007659053  | 3.64713862908321  |
| H | 7.20039881487817  | 8.25825519284427  | 4.41467455463269  |
| C | 7.35044750966873  | 7.93028074770466  | 6.57222106784638  |
| C | 8.74421673340798  | 8.52861061137885  | 6.83754090967313  |
| H | 6.58515629887706  | 8.69510745228724  | 6.73898391440516  |
| H | 7.16606525354582  | 7.11419639886838  | 7.27732612893033  |
| H | 9.49667380272314  | 7.77122728290426  | 6.59234965082119  |
| H | 8.90692469998874  | 9.38200809998954  | 6.17016645078947  |
| C | -0.16983656264115 | -1.45187108549457 | -1.71985495408221 |
| C | 0.38497756305922  | -1.08272291469162 | -3.10108745393464 |
| C | -1.65013092983563 | -1.07730542579562 | -1.62794200291924 |
| C | -0.14821751513806 | -3.99260837750225 | 1.69503932094853  |
| C | -0.78027830688957 | -5.11273816209251 | 2.53077663613092  |
| C | 1.37743856319806  | -4.06834076003958 | 1.78604854996888  |
| C | -2.22803808271885 | 4.42100750449748  | -1.75201779185300 |
| C | -3.44092543187128 | 3.70925230449847  | -2.36339631286121 |
| C | -0.53203187660865 | 7.78050667302520  | 0.44196533875349  |
| C | 0.32331687967355  | 9.05352024663143  | 0.46050351640212  |
| C | -1.63179951994876 | 7.86958409281275  | 1.50182620770572  |
| C | -0.95619923377842 | 4.04109953066917  | -2.51326819942726 |
| H | -2.38326483180709 | 5.50689654499412  | -1.86786737734913 |
| H | -3.54916342292632 | 3.97605556987126  | -3.41593035363013 |
| H | -3.32408191875259 | 2.62663122038654  | -2.28582255160942 |
| H | -4.34984310479708 | 3.99910213116529  | -1.83387622244915 |
| H | -1.05903845728071 | 4.27461437145255  | -3.57408202038413 |
| H | -0.10048689717561 | 4.60242645673417  | -2.11752561680962 |
| H | -0.74888690767477 | 2.97262489885946  | -2.41124653864876 |
| H | -1.01408857536448 | 7.71559839057613  | -0.54758170971527 |
| H | -2.25076347140021 | 8.75321389874125  | 1.33910854197718  |
| H | -2.27499198067347 | 6.98264596696917  | 1.45097256673249  |
| H | -1.19866913108934 | 7.92819844718253  | 2.50348010338912  |
| H | -0.29664972448817 | 9.93306337982560  | 0.27965345834348  |
| H | 0.81740129761233  | 9.16491260809755  | 1.42760127742984  |
| H | 1.08863378208352  | 9.00022932830974  | -0.31555853155216 |
| H | -0.08592376506999 | -2.54585860454189 | -1.60663699712335 |

|   |                   |                   |                   |
|---|-------------------|-------------------|-------------------|
| H | -0.43605875260949 | -4.15677962529310 | 0.64335791163997  |
| H | -2.22043368304224 | -1.56541650473565 | -2.41958966194247 |
| H | -2.05810827833111 | -1.39631294551472 | -0.66065313124991 |
| H | -1.78046361106683 | 0.00381515570627  | -1.72092798950023 |
| H | -0.17527526716211 | -1.59363543876959 | -3.88577075147294 |
| H | 0.31379619870625  | -0.00544868702290 | -3.26277561899570 |
| H | 1.43350823648180  | -1.37621394594410 | -3.17258040170355 |
| H | 1.73222400866648  | -5.04695919086273 | 1.45892645258685  |
| H | 1.83148708675184  | -3.30453637703889 | 1.14303354563397  |
| H | 1.71266167354891  | -3.90300184501137 | 2.81297421123709  |
| H | -0.43333675055932 | -6.08768595955019 | 2.18458222259197  |
| H | -0.51296108312844 | -4.99834440429857 | 3.58290485609889  |
| H | -1.86718398809946 | -5.07706336425544 | 2.44253086787109  |
| C | 8.94138499028297  | 8.96709964291051  | 8.29848801074797  |
| C | 10.42131176258934 | 9.28225933989757  | 8.54864044854166  |
| C | 8.07880816439520  | 10.18427318502506 | 8.64953964948382  |
| H | 8.65187242945635  | 8.13351791834107  | 8.95496470077330  |
| H | 8.26359323429025  | 10.48861570748854 | 9.68071763618241  |
| H | 8.31378242737068  | 11.02443694525902 | 7.99362371023249  |
| H | 7.01845711094183  | 9.95120495109999  | 8.54913022417526  |
| H | 10.57485023760088 | 9.57439765860823  | 9.58835788762340  |
| H | 11.03724290266323 | 8.40595824887565  | 8.34216843637980  |
| H | 10.75389210161280 | 10.09961785827292 | 7.90636722054812  |

# Stage 4

**Table S40: *i*-C<sub>4</sub>H<sub>9</sub>-TTT-AS-T**

| Atom | x                 | y                 | z                 |
|------|-------------------|-------------------|-------------------|
| C    | 1.35885484408058  | -4.11025532896538 | -3.22109900668447 |
| Al   | 3.17136797668029  | -3.50223718977010 | -2.73134385665661 |
| Cl   | 4.20545125256315  | -2.98660176101043 | -4.75631123840058 |
| Nd   | 3.76074859056923  | -0.12707402765240 | -4.55688141010116 |
| C    | 2.73133295131363  | -1.25685776175666 | -8.29134957150886 |
| C    | 4.51044612974159  | -4.33885567183547 | -1.54829414785078 |
| Cl   | 3.00946344298018  | -1.27545890003348 | -2.08575248569283 |
| Cl   | 4.76078868154732  | 2.09462513360215  | -6.01777653102715 |
| Al   | 5.31187632685933  | 3.45446839126800  | -4.16556760218341 |
| C    | 4.02376531695771  | 4.94418403539206  | -4.07849676744998 |
| Cl   | 4.58263694656478  | 1.87103244275844  | -2.65367098374692 |
| C    | 7.28567496697703  | 3.55659743264021  | -4.16017797871895 |
| H    | 0.77545919688786  | -3.24281713346753 | -3.55855160954795 |
| H    | 1.43395145878861  | -4.77355958647166 | -4.09416870942980 |
| H    | 5.50845449728663  | -4.00980684978102 | -1.86271584247779 |
| H    | 4.37638214429501  | -3.95085359403963 | -0.52908219393820 |
| H    | 7.70556936499833  | 2.58220564711752  | -3.88271760479453 |
| H    | 7.62848924428918  | 3.74360188878089  | -5.18774797786927 |
| H    | 3.07428626694977  | 4.63427112052791  | -4.53336174232184 |
| H    | 3.79776834179441  | 5.13496039547255  | -3.01993578234243 |
| H    | 2.53877111288070  | -1.68331506589354 | -9.28414603408791 |
| H    | 2.66851316434135  | -0.16765023760094 | -8.40143852415749 |
| C    | 1.66463995085406  | -1.77808943572593 | -7.30743188765454 |
| C    | 1.62539278659501  | -1.07124175638637 | -5.97223297671778 |
| C    | 1.43324057237688  | 0.28456469276779  | -5.80831605408940 |
| C    | 1.45858667211211  | 0.93729570340965  | -4.56334557485386 |
| H    | 1.83328276240360  | -2.84295103019349 | -7.13370998153006 |
| H    | 0.68217117516463  | -1.70377539151217 | -7.78813120231599 |
| H    | 1.42200537620948  | -1.70899940352072 | -5.11168275118816 |
| H    | 1.51153992496966  | 0.91329756624830  | -6.69477033422917 |
| H    | 1.36938356839477  | 2.01425339070193  | -4.51632655222630 |
| H    | 1.10098522353671  | 0.41128721395581  | -3.67984920315115 |
| C    | 0.38871000458661  | 4.41600999561941  | -2.49672157477328 |
| C    | 1.13619792273486  | 3.57261386069730  | -1.77683812549637 |
| C    | 0.60476918790827  | 2.47837243146593  | -0.98338484717204 |
| C    | 1.35600588326037  | 1.63337427569370  | -0.26948127065950 |
| H    | 0.91635168920704  | 0.82698889402843  | 0.30338885379424  |
| H    | 2.43643114691313  | 1.72054923972950  | -0.24588056299533 |
| H    | -0.47603567756956 | 2.35632557155160  | -0.98889088864187 |
| H    | 2.21681047481866  | 3.68640815196798  | -1.77718347205333 |
| H    | 0.83496365141820  | 5.21459022175513  | -3.07468942862235 |
| H    | -0.69224839835317 | 4.32915011918925  | -2.52629780054948 |
| C    | 4.13209144177237  | -1.65298539910888 | -7.90270709282921 |

|   |                   |                   |                   |
|---|-------------------|-------------------|-------------------|
| C | 5.16491491664991  | -0.81465319648618 | -7.86047431542568 |
| C | 6.59247484003458  | -1.26163174952270 | -7.70785186981933 |
| C | 7.35092588782763  | -0.57610167518043 | -6.55776663924671 |
| H | 7.14365603035228  | 0.50001920233840  | -6.55211551575880 |
| H | 8.42363530497320  | -0.70275954522280 | -6.74726559269861 |
| H | 5.02608578491396  | 0.24415142296737  | -8.07180136243438 |
| H | 4.28125097156903  | -2.72005495567308 | -7.74490768455661 |
| H | 7.11054098559776  | -1.01804948066364 | -8.64253390830470 |
| H | 6.63749446197146  | -2.34803374847502 | -7.57855632781775 |
| C | 0.56655132697053  | -4.83389670811722 | -2.12172115620022 |
| C | -0.82785694155782 | -5.21303068559268 | -2.63508868827014 |
| C | 7.05968780818537  | -1.18656176874755 | -5.21573492592263 |
| C | 6.89510845110973  | -0.49348885694091 | -4.08941079248038 |
| C | 6.82297740693420  | -1.11541808712255 | -2.71932045945216 |
| C | 7.97169678846465  | -0.60132056521024 | -1.83996695715959 |
| C | 7.87313783211061  | -1.10251266654153 | -0.38969005186398 |
| C | 8.21252884882082  | -2.59257158886325 | -0.28277451279386 |
| C | 4.49068773730259  | -5.87352698852601 | -1.49826007976662 |
| C | 5.57125404440859  | -6.38879939292494 | -0.54000941396943 |
| C | 4.48873291790432  | 6.25971988128047  | -4.71947432200510 |
| C | 3.43170627753542  | 7.35295793212039  | -4.52255463480710 |
| C | 7.89546492898129  | 4.62579254825869  | -3.24148256657324 |
| C | 9.42654586783834  | 4.56956858717290  | -3.31014905069916 |
| C | 0.44732375675216  | -3.97627012303061 | -0.85998105512925 |
| C | 4.69037795200233  | -6.47855428693842 | -2.88960559034861 |
| C | 7.42851881184699  | 4.45699731260667  | -1.79405233175363 |
| C | 4.79149742316918  | 6.08055325173902  | -6.20853582992266 |
| C | 8.80669515813190  | -0.28271182566085 | 0.50803778529007  |
| H | 7.08586240344742  | -2.27494316347041 | -5.18718553543018 |
| H | 6.96071956828412  | 0.59631042928330  | -4.10401940048263 |
| H | 5.87567867226200  | -0.85241217022390 | -2.22800769608727 |
| H | 6.87171235211705  | -2.20616136163056 | -2.80637430660594 |
| H | 8.92957681467512  | -0.90359891434721 | -2.27637043839340 |
| H | 7.94067860615442  | 0.49448539007906  | -1.83691257420397 |
| H | 5.41267561227672  | 6.59918273047412  | -4.22190863250706 |
| H | 3.77694698223786  | 8.29725570233135  | -4.94695544624744 |
| H | 2.49661516083941  | 7.07045137176678  | -5.00959956307601 |
| H | 3.23935329404749  | 7.49892654917186  | -3.45836981443710 |
| H | 5.12388506912783  | 7.02205982952464  | -6.64865016802683 |
| H | 5.58592723723912  | 5.33671074008340  | -6.34399101062239 |
| H | 3.90258838085776  | 5.74030567727238  | -6.74529357138946 |
| H | 7.58207577832735  | 5.62498302352491  | -3.58697940662688 |
| H | 7.87129148622108  | 5.22349725537051  | -1.15599327372566 |
| H | 6.33686873697273  | 4.54882791611529  | -1.73765225555076 |
| H | 7.71498471598556  | 3.47607829468194  | -1.40697833285517 |
| H | 9.86559176388849  | 5.34804921461874  | -2.68396491782661 |

|   |                   |                   |                   |
|---|-------------------|-------------------|-------------------|
| H | 9.78631011338447  | 3.59798693454252  | -2.96591169527447 |
| H | 9.76038931599352  | 4.71896151504068  | -4.33824737064443 |
| H | 1.08847955686350  | -5.76720674005127 | -1.85249195716718 |
| H | 3.51431097477449  | -6.21364844406600 | -1.11415317633441 |
| H | -0.12138865023341 | -4.50167790838661 | -0.09117240661884 |
| H | 1.44440290150543  | -3.75379720022060 | -0.46047587327516 |
| H | -0.05689898592918 | -3.03195709762458 | -1.08042558736142 |
| H | -1.38222593683517 | -5.75726876096140 | -1.86874620235643 |
| H | -1.38990867496794 | -4.31670106690766 | -2.90467937431809 |
| H | -0.74093243763677 | -5.84663201360496 | -3.51928940712181 |
| H | 4.67382734638115  | -7.56850982843090 | -2.84120845556510 |
| H | 3.88747567298389  | -6.15060224564089 | -3.56143533766334 |
| H | 5.64723536737823  | -6.16376297590223 | -3.31349641447767 |
| H | 5.53459745286168  | -7.47747675842363 | -0.47332857748188 |
| H | 6.56175332514485  | -6.09230870295164 | -0.89007306980250 |
| H | 5.41634313426420  | -5.97262066906451 | 0.45676505607108  |
| H | 6.84045757524454  | -0.95409614102140 | -0.03962470274366 |
| H | 8.14216603624423  | -2.91989637500652 | 0.75540889545441  |
| H | 7.51917807149410  | -3.19083298827334 | -0.87519155444915 |
| H | 9.22644348796161  | -2.78393845608485 | -0.63868284404266 |
| H | 8.73293623361890  | -0.62447232735001 | 1.54125179927281  |
| H | 9.84296384195913  | -0.38692595513820 | 0.18168998625847  |
| H | 8.53630550312100  | 0.77367415624277  | 0.47355479257108  |

#### Stage 4

**Table S41: *i*-C<sub>4</sub>H<sub>9</sub>-CCC-AS-trans-cis transition state**

| Atom | x                 | y                 | z                 |
|------|-------------------|-------------------|-------------------|
| C    | -0.43149456402162 | 0.09787635754064  | -0.25061843816760 |
| Al   | -0.30957547087882 | -0.42541709995208 | 1.64810626685170  |
| Cl   | 1.93862013624289  | -1.00067398313209 | 1.99402813454725  |
| Nd   | 2.77097923474445  | 1.46679561036016  | 3.04651838184136  |
| C    | -1.42362528981124 | -1.68275191329118 | 2.68529175325491  |
| Cl   | -0.12037505020076 | 1.47335735755683  | 2.94637770688145  |
| Cl   | 2.57404095449647  | 2.55695534457780  | 0.43995620685822  |
| Al   | 1.99745038983942  | 4.70502322985277  | 1.10398805175363  |
| C    | 0.05990409188552  | 4.95976985404169  | 0.84251812973790  |
| Cl   | 2.22200501353914  | 4.24030040427911  | 3.40169797339110  |
| C    | 3.54546684256882  | 5.82644180199613  | 0.59770143099764  |
| H    | 0.08649035827621  | 1.05805099410123  | -0.36937617360336 |
| H    | 0.14108105205445  | -0.62470285028650 | -0.84897469963593 |
| H    | -0.83468529104824 | -2.04877872562458 | 3.53743643550418  |
| H    | -2.26045605854067 | -1.11933643499979 | 3.12184979427642  |
| H    | 4.29912707915915  | 5.75780929270319  | 1.39388629567023  |
| H    | 4.01074115348174  | 5.37788074637131  | -0.29097517866997 |
| H    | -0.41835417366146 | 3.97394979172916  | 0.90738297956282  |
| H    | -0.33043452016171 | 5.53572285058499  | 1.69317620450708  |
| C    | 6.33589659347345  | 3.04279021836503  | 3.82124981280379  |
| H    | 7.05300500837839  | 2.25978384218214  | 4.09470984517632  |
| H    | 6.89637169529911  | 3.98264354739815  | 3.76359184777966  |
| C    | 4.69889263994524  | 0.14047067221976  | 4.20953310722690  |
| C    | 5.12615488872969  | 0.21493319107456  | 2.86326711296373  |
| C    | 5.34575509652114  | 1.32166992975238  | 2.07371340507663  |
| C    | 5.74667509432225  | 2.75013387399544  | 2.43160381499158  |
| H    | 4.51894645831692  | -0.84787364958290 | 4.61725402332550  |
| H    | 5.07458785481689  | 0.84854131319239  | 4.94032717368823  |
| H    | 5.00104350186227  | -0.70514251277585 | 2.29416010992546  |
| H    | 5.43329539809405  | 1.12034375803689  | 1.01220683527476  |
| H    | 6.49518798036934  | 3.03508804087293  | 1.68677952497324  |
| H    | 4.92779786116421  | 3.45837380651527  | 2.23424527432551  |
| C    | 2.08545995193412  | 0.79019241656694  | 6.05303352995607  |
| C    | 1.35313732885792  | 1.90539814211547  | 6.12139491499107  |
| C    | 1.76032993917416  | 3.14569816090391  | 6.82220564195822  |
| C    | 1.30426202695037  | 3.51410427404325  | 8.01353984996109  |
| H    | 1.62827855565204  | 4.43937793248231  | 8.47353150180314  |
| H    | 0.59749027986785  | 2.90790317458558  | 8.56927065716916  |
| H    | 2.45206242853901  | 3.79521857240982  | 6.29489193593405  |
| H    | 0.37754004414923  | 1.91871075961602  | 5.64338701537596  |
| H    | 1.70139707953478  | -0.10351228053948 | 5.56943619005446  |
| H    | 3.05274653144413  | 0.70945095040951  | 6.53066710369276  |
| C    | 6.79646013859263  | 5.68222878055719  | 6.83947589858962  |



|   |                   |                   |                   |
|---|-------------------|-------------------|-------------------|
| H | 5.99486590974105  | 5.92527406766736  | 7.54298984283441  |
| H | 7.74251525239359  | 6.00695918567135  | 7.28328547448690  |
| C | 5.30805030500133  | 3.18551928655806  | 4.91696877987739  |
| C | 5.54125832329982  | 3.63363116740373  | 6.14437614607790  |
| H | 4.28547306571020  | 2.89568864424709  | 4.64360921302674  |
| H | 4.72095823511651  | 3.68922994615365  | 6.85426432790134  |
| C | 6.85377477702997  | 4.14723839161168  | 6.65788817493019  |
| H | 7.06462162108815  | 3.69433206408478  | 7.63181338131671  |
| H | 7.67282727594746  | 3.89166331070544  | 5.98002025161791  |
| C | 6.60091267898128  | 6.38411631687269  | 5.52279627520731  |
| C | 5.44882582019223  | 6.80528001876968  | 5.01183738923251  |
| H | 7.51160404030704  | 6.51607989290543  | 4.94323372353908  |
| H | 5.45560134034655  | 7.28947683179583  | 4.0369658662466   |
| C | 4.08749526874405  | 6.69414602164555  | 5.63704513469653  |
| C | 3.41056670585590  | 8.06866171260212  | 5.75020418063564  |
| H | 3.47523553201539  | 6.04228412889234  | 5.00393490808433  |
| H | 4.14313130925682  | 6.23423123975625  | 6.62806135611166  |
| H | 4.05626242192310  | 8.72796050522884  | 6.34065939823405  |
| H | 3.31184798845101  | 8.51189102436069  | 4.75292321220886  |
| C | -1.84496641353793 | 0.20767275978356  | -0.83597538862958 |
| C | -1.77637785336171 | 0.66398066176011  | -2.29841076189767 |
| C | -2.71894687484078 | 1.16698042354868  | -0.02609809310046 |
| C | -1.99039076418875 | -2.88140063937283 | 1.91110523445565  |
| C | -2.82684363660703 | -3.76632417632845 | 2.84356743828055  |
| C | -0.87906251193916 | -3.70664953800531 | 1.25899993508066  |
| C | -0.37040425733085 | 5.64973289918204  | -0.45797074829588 |
| C | -1.89917003586641 | 5.74375719684078  | -0.52771819064280 |
| C | 3.26024646981507  | 7.30725016302403  | 0.30759703876392  |
| C | 4.55401013885020  | 8.02962269177380  | -0.08778469600084 |
| C | 2.61956699916619  | 8.00207067797149  | 1.50990742759218  |
| C | 0.17006743103439  | 4.91915629374234  | -1.68849154907208 |
| H | 0.02708595835676  | 6.67866600354554  | -0.47136648951972 |
| H | -2.20882237017949 | 6.26692647721775  | -1.43399407660525 |
| H | -2.34087102143098 | 4.74538421768847  | -0.53092712812293 |
| H | -2.27974248871084 | 6.28875865633642  | 0.33761971481417  |
| H | -0.13619398138805 | 5.42818399560607  | -2.60371031095544 |
| H | 1.26652561756327  | 4.89178981248673  | -1.65801456679227 |
| H | -0.20165571416667 | 3.89219408492670  | -1.72176589869962 |
| H | 2.56191117619606  | 7.38350312300128  | -0.54239101809600 |
| H | 2.39299387752802  | 9.04376662278181  | 1.27737163486133  |
| H | 1.68547896356417  | 7.49741100675547  | 1.78307934707512  |
| H | 3.29157385419033  | 7.97788492944601  | 2.37042617813792  |
| H | 4.35135523753916  | 9.07695001306804  | -0.31810755769471 |
| H | 5.27844268145554  | 7.98348983476810  | 0.72768908491894  |
| H | 4.99206556922499  | 7.55697985101004  | -0.96839742885388 |
| H | -2.32334884854063 | -0.78644689030630 | -0.81861520638907 |

|   |                   |                   |                   |
|---|-------------------|-------------------|-------------------|
| H | -2.65714077865574 | -2.51546298677825 | 1.11258602690596  |
| H | -3.71841185982737 | 1.23517202341529  | -0.45833546378316 |
| H | -2.81259306440411 | 0.81017351331642  | 1.00702992447219  |
| H | -2.27970129136801 | 2.16748676493943  | -0.00938191058222 |
| H | -2.77724635952301 | 0.71264991527801  | -2.73050189547931 |
| H | -1.31723674411357 | 1.65226762510596  | -2.36530681208371 |
| H | -1.17728185835216 | -0.03708968344953 | -2.88156619226138 |
| H | -1.29975559416279 | -4.55356206249882 | 0.71464646609496  |
| H | -0.31648856594095 | -3.08653780838990 | 0.55044600759579  |
| H | -0.18650435829860 | -4.08751305069552 | 2.01363101112960  |
| H | -3.25734428062845 | -4.60247661995208 | 2.29009718806014  |
| H | -2.20654832585300 | -4.16105274369539 | 3.65036632065894  |
| H | -3.63826937273520 | -3.18356270196603 | 3.28251283650928  |
| C | 2.02874563725606  | 7.99502012180514  | 6.42230756404410  |
| C | 1.54725592904478  | 9.40768452731600  | 6.77447418792623  |
| C | 0.99428161442365  | 7.29606301847397  | 5.53417973938783  |
| H | 2.12708732399564  | 7.42312854119022  | 7.35675205363057  |
| H | 0.02587919115293  | 7.27287903041874  | 6.03593577312854  |
| H | 0.87970890970136  | 7.82706839073276  | 4.58658161782939  |
| H | 1.29229754974648  | 6.26853891114812  | 5.32443613171229  |
| H | 0.57628694949208  | 9.36327385722904  | 7.26971660702796  |
| H | 2.25521665075256  | 9.89511970494024  | 7.44620179591881  |
| H | 1.44907463454729  | 10.01550911912507 | 5.87322403632394  |

#### Stage 4

**Table S42: *i*-C<sub>4</sub>H<sub>9</sub>-CCC-AS-C-TS inclusion *cis*-C<sub>4</sub>H<sub>8</sub> in polymer. Transition state**

| Atom | x                 | y                 | z                 |
|------|-------------------|-------------------|-------------------|
| C    | 1.08605318966389  | -0.21660851641238 | -0.72269204510608 |
| Al   | 0.40666259739553  | -0.81282917420038 | 1.03079215468340  |
| Cl   | 1.95428049563143  | -0.00661151715717 | 2.57907803056022  |
| Nd   | 0.15668593748687  | 1.89180298285953  | 3.70936212534982  |
| C    | -0.20415437207501 | -2.59385005760521 | 1.63527070030511  |
| Cl   | -1.33918731459140 | 0.58029570700558  | 1.68077691982118  |
| Cl   | 1.04768333283301  | 3.20619742791112  | 1.26435746010039  |
| Al   | -0.54847835878004 | 4.84570121833710  | 1.27977373917940  |
| C    | -1.98352481395986 | 4.37418671197599  | 0.00964253053414  |
| Cl   | -1.39641627354813 | 4.22350016013032  | 3.39114090768504  |
| C    | 0.44451149171443  | 6.53869122899086  | 1.51697511473320  |
| H    | 0.99631308901110  | 0.87706721353404  | -0.75406688857564 |
| H    | 2.16373374364772  | -0.42832872732586 | -0.76598070975450 |
| H    | -0.15837357915948 | -2.61577463717013 | 2.73272991249326  |
| H    | -1.26948702672278 | -2.68890099640726 | 1.38134207508809  |
| H    | 0.79924773952128  | 6.59123514636368  | 2.55506799125936  |
| H    | 1.35177678505763  | 6.48262840119654  | 0.89841572745458  |
| H    | -2.03410018668399 | 3.27786990698260  | -0.03612303515397 |
| H    | -2.94778341660101 | 4.70183220359862  | 0.42257037262918  |
| C    | 3.51923292974677  | 5.47346986804926  | 4.70511049778340  |
| H    | 4.48937326373254  | 5.01860504541148  | 4.48094189339074  |
| H    | 3.46131078594942  | 6.40615152061816  | 4.13253872299972  |
| C    | 0.59352734064178  | 2.99361632132645  | 6.30873603719720  |
| C    | 1.85587008471580  | 2.55809627798098  | 5.74542056363948  |
| C    | 2.55038691523333  | 3.13877669944961  | 4.72699516908387  |
| C    | 2.38395794221344  | 4.53772415889380  | 4.20337582715188  |
| H    | 0.52829288079211  | 2.83621149417448  | 7.37540391028682  |
| H    | 0.27275598669397  | 3.99552490729553  | 6.03513783929732  |
| H    | 2.24375150782603  | 1.61374157164185  | 6.12383220835187  |
| H    | 3.43078976827766  | 2.61373591911221  | 4.36873283879222  |
| H    | 2.42683389145949  | 4.52877387515070  | 3.11559197878153  |
| H    | 1.41468624794488  | 4.96046771399831  | 4.47292448871992  |
| C    | -0.10411832698222 | -0.68238691724770 | 5.36525657790949  |
| C    | -1.28861469626459 | -0.18021611353804 | 4.94202555987969  |
| C    | -1.76946939784428 | 1.14801437013675  | 5.22249513891427  |
| C    | -1.24840113991644 | 1.89228750643244  | 6.30371047801032  |
| H    | -1.77863789014815 | 2.79113359734645  | 6.58653301393082  |
| H    | -0.86365489871807 | 1.31852010601928  | 7.13533313291836  |
| H    | -2.64608438288844 | 1.51152570062558  | 4.69869885873994  |
| H    | -1.86224685616912 | -0.76178363262965 | 4.22963415643181  |
| H    | 0.23856242703131  | -1.65341181423641 | 5.04021547709501  |
| H    | 0.51425486897200  | -0.17576908903890 | 6.09819389022039  |
| C    | 6.53712871145318  | 4.57855491264418  | 6.83366204767773  |

|   |                   |                   |                   |
|---|-------------------|-------------------|-------------------|
| H | 6.70723722481299  | 5.47238257550582  | 7.43953912849008  |
| H | 7.20959647475304  | 3.79550678100433  | 7.20090895584176  |
| C | 3.42517967005054  | 5.80443309911388  | 6.16849138287894  |
| C | 4.10238067411041  | 5.22404332095940  | 7.15369699687044  |
| H | 2.72652990949634  | 6.60298669024633  | 6.40942785355898  |
| H | 3.96119590353019  | 5.59154266845258  | 8.16727965817856  |
| C | 5.08211046290149  | 4.08849973482431  | 7.03377776206546  |
| H | 5.04065870359553  | 3.50157115722254  | 7.95637593998438  |
| H | 4.81119594710817  | 3.42504769143351  | 6.20706676852603  |
| C | 6.84628775622349  | 4.81735343552225  | 5.38256156831511  |
| C | 7.16604402791417  | 5.96762118469296  | 4.79860964683854  |
| H | 6.79290018449125  | 3.91987787837015  | 4.76956167434707  |
| H | 7.37704962050208  | 5.96782682498287  | 3.73153433539850  |
| C | 7.32237583728342  | 7.30945162381169  | 5.45665541343643  |
| C | 8.81267754743334  | 7.68811943627870  | 5.52530983039083  |
| H | 6.78125762358315  | 8.05463944406915  | 4.86436184065273  |
| H | 6.89867874065541  | 7.31290681493262  | 6.46537936431349  |
| H | 9.33795729141101  | 6.91596342725244  | 6.09775917484599  |
| H | 9.23423212843244  | 7.69144644551522  | 4.51410100019045  |
| C | 0.41603128771676  | -0.81980487892163 | -1.96549534024312 |
| C | 1.04186613221065  | -0.23876516284525 | -3.23915163572638 |
| C | -1.09484441071297 | -0.57809344235315 | -1.96472980003779 |
| C | 0.54237718248011  | -3.81539835767882 | 1.07903573600372  |
| C | -0.04775659096928 | -5.10715515738872 | 1.65810659517758  |
| C | 2.04100730107809  | -3.73997557913091 | 1.37809431950640  |
| C | -1.84521750927654 | 4.93339529460536  | -1.41408854235436 |
| C | -2.98947587519752 | 4.42258223623632  | -2.29789989332556 |
| C | -0.30025567802149 | 7.83805286078578  | 1.17718744898682  |
| C | 0.61854997593631  | 9.04773535720566  | 1.38823619651973  |
| C | -1.57137932882341 | 7.98837182645214  | 2.01557200322756  |
| C | -0.49689477278600 | 4.56448630339264  | -2.03622560044734 |
| H | -1.91442300182451 | 6.03393733920584  | -1.37959286893765 |
| H | -2.91417565846594 | 4.84373610426503  | -3.30191535667511 |
| H | -2.95521474598710 | 3.33374562327804  | -2.37052528218739 |
| H | -3.95036043191315 | 4.71188870839768  | -1.86928680881298 |
| H | -0.41752959296061 | 4.96543050043279  | -3.04794956276061 |
| H | 0.32152648603333  | 4.98011033312454  | -1.43515115588755 |
| H | -0.37732985529869 | 3.47906970658379  | -2.08287117235228 |
| H | -0.59198393501870 | 7.82204865350720  | 0.11361870867944  |
| H | -2.09119504427240 | 8.91384984023516  | 1.76261277466123  |
| H | -2.24942240125756 | 7.14777360043635  | 1.82416898750701  |
| H | -1.33097721922484 | 8.00493339293556  | 3.08152931605504  |
| H | 0.10295477222089  | 9.97165136779443  | 1.12087132171382  |
| H | 0.93146591398842  | 9.10955327574126  | 2.43233642502571  |
| H | 1.50925285064774  | 8.95252966437466  | 0.76490328999454  |
| H | 0.58639077477713  | -1.90991272876417 | -1.97696337393755 |

|   |                   |                   |                   |
|---|-------------------|-------------------|-------------------|
| H | 0.41416066292993  | -3.85078561256254 | -0.01570366690647 |
| H | -1.55231181084897 | -1.00466393480807 | -2.85885654380493 |
| H | -1.55061650769835 | -1.04911260707947 | -1.08534023661324 |
| H | -1.31502908328648 | 0.49227301133328  | -1.93890228135157 |
| H | 0.58976712611407  | -0.68665386087536 | -4.12573219102023 |
| H | 0.89177978306689  | 0.84192875306748  | -3.27659543549089 |
| H | 2.11413633743791  | -0.44084925033188 | -3.25424790283050 |
| H | 2.55691157123839  | -4.61498669280400 | 0.97963019422703  |
| H | 2.47181054005320  | -2.84388971132407 | 0.91484502243831  |
| H | 2.21797502229829  | -3.69298120784177 | 2.45560793340724  |
| H | 0.45868799362706  | -5.97973821651258 | 1.24220623793788  |
| H | 0.06257243553744  | -5.12164071010881 | 2.74414099105717  |
| H | -1.11003438698064 | -5.17245261371883 | 1.41691089031070  |
| C | 9.05622338602335  | 9.05314456278493  | 6.19043999475733  |
| C | 10.54937590831122 | 9.21888124580826  | 6.49858695838799  |
| C | 8.57119135821940  | 10.20852781791337 | 5.30793919553036  |
| H | 8.50319162023525  | 9.08364067305894  | 7.14057242804564  |
| H | 8.78082280627962  | 11.16317671651460 | 5.79242775612125  |
| H | 9.07783108616494  | 10.19256886489349 | 4.34125986944078  |
| H | 7.49632406988744  | 10.14290464091544 | 5.13723412729149  |
| H | 10.73073585254028 | 10.17781964764831 | 6.98584745836017  |
| H | 10.89115641686843 | 8.42404319628318  | 7.16294117143585  |
| H | 11.13746497502053 | 9.18011849442297  | 5.57997272728153  |

**Stage 4**

**Table S43: *i*-C<sub>4</sub>H<sub>9</sub>-CCC-AS-T-TS inclusion *trans*-C<sub>4</sub>H<sub>8</sub> in polymer. Transition state**

| Atom | x            | y            | z            |
|------|--------------|--------------|--------------|
| C    | 1.358854844  | -4.110255329 | -3.221099007 |
| Al   | 3.171367977  | -3.502237190 | -2.731343857 |
| Cl   | 4.205451253  | -2.986601761 | -4.756311238 |
| Nd   | 3.760748591  | -0.127074028 | -4.556881410 |
| C    | 2.731332951  | -1.256857762 | -8.291349572 |
| C    | 4.510446130  | -4.338855672 | -1.548294148 |
| Cl   | 3.009463443  | -1.275458900 | -2.085752486 |
| Cl   | 4.760788682  | 2.094625134  | -6.017776531 |
| Al   | 5.311876327  | 3.454468391  | -4.165567602 |
| C    | 4.023765317  | 4.944184035  | -4.078496767 |
| Cl   | 4.582636947  | 1.871032443  | -2.653670984 |
| C    | 7.285674967  | 3.556597433  | -4.160177979 |
| H    | 0.775459197  | -3.242817133 | -3.558551610 |
| H    | 1.433951459  | -4.773559586 | -4.094168709 |
| H    | 5.508454497  | -4.009806850 | -1.862715842 |
| H    | 4.376382144  | -3.950853594 | -0.529082194 |
| H    | 7.705569365  | 2.582205647  | -3.882717605 |
| H    | 7.628489244  | 3.743601889  | -5.187747978 |
| H    | 3.074286267  | 4.634271121  | -4.533361742 |
| H    | 3.797768342  | 5.134960395  | -3.019935782 |
| H    | 2.538771113  | -1.683315066 | -9.284146034 |
| H    | 2.668513164  | -0.167650238 | -8.401438524 |
| C    | 1.664639951  | -1.778089436 | -7.307431888 |
| C    | 1.625392787  | -1.071241756 | -5.972232977 |
| C    | 1.433240572  | 0.284564693  | -5.808316054 |
| C    | 1.458586672  | 0.937295703  | -4.563345575 |
| H    | 1.833282762  | -2.842951030 | -7.133709982 |
| H    | 0.682171175  | -1.703775392 | -7.788131202 |
| H    | 1.422005376  | -1.708999404 | -5.111682751 |
| H    | 1.511539925  | 0.913297566  | -6.694770334 |
| H    | 1.295611652  | 1.980869409  | -4.729662137 |
| H    | 0.711610360  | 0.411214948  | -4.000645855 |
| C    | 0.804691695  | 1.837333596  | -2.709048667 |
| C    | 1.478960573  | 2.084953463  | -1.581071145 |
| C    | 1.411363469  | 1.260533911  | -0.387290619 |
| C    | 2.091782709  | 1.508171216  | 0.736872268  |
| H    | 2.015133900  | 0.861806825  | 1.601783482  |
| H    | 2.753503398  | 2.363023043  | 0.819511858  |
| H    | 0.761819209  | 0.389467136  | -0.436278757 |
| H    | 2.135882177  | 2.949120136  | -1.532669540 |
| H    | 0.800566664  | 2.748949494  | -3.305176151 |
| H    | -0.089855083 | 1.379820493  | -2.486819989 |
| C    | 4.132091442  | -1.652985399 | -7.902707093 |

|   |              |              |              |
|---|--------------|--------------|--------------|
| C | 5.164914917  | -0.814653196 | -7.860474315 |
| C | 6.592474840  | -1.261631750 | -7.707851870 |
| C | 7.350925888  | -0.576101675 | -6.557766639 |
| H | 7.143656030  | 0.500019202  | -6.552115516 |
| H | 8.423635305  | -0.702759545 | -6.747265593 |
| H | 5.026085785  | 0.244151423  | -8.071801362 |
| H | 4.281250972  | -2.720054956 | -7.744907685 |
| H | 7.110540986  | -1.018049481 | -8.642533908 |
| H | 6.637494462  | -2.348033748 | -7.578556328 |
| C | 0.566551327  | -4.833896708 | -2.121721156 |
| C | -0.827856942 | -5.213030686 | -2.635088688 |
| C | 7.059687808  | -1.186561769 | -5.215734926 |
| C | 6.895108451  | -0.493488857 | -4.089410792 |
| C | 6.822977407  | -1.115418087 | -2.719320459 |
| C | 7.971696788  | -0.601320565 | -1.839966957 |
| C | 7.873137832  | -1.102512667 | -0.389690052 |
| C | 8.212528849  | -2.592571589 | -0.282774513 |
| C | 4.490687737  | -5.873526989 | -1.498260080 |
| C | 5.571254044  | -6.388799393 | -0.540009414 |
| C | 4.488732918  | 6.259719881  | -4.719474322 |
| C | 3.431706278  | 7.352957932  | -4.522554635 |
| C | 7.895464929  | 4.625792548  | -3.241482567 |
| C | 9.426545868  | 4.569568587  | -3.310149051 |
| C | 0.447323757  | -3.976270123 | -0.859981055 |
| C | 4.690377952  | -6.478554287 | -2.889605590 |
| C | 7.428518812  | 4.456997313  | -1.794052332 |
| C | 4.791497423  | 6.080553252  | -6.208535830 |
| C | 8.806695158  | -0.282711826 | 0.508037785  |
| H | 7.085862403  | -2.274943163 | -5.187185535 |
| H | 6.960719568  | 0.596310429  | -4.104019400 |
| H | 5.875678672  | -0.852412170 | -2.228007696 |
| H | 6.871712352  | -2.206161362 | -2.806374307 |
| H | 8.929576815  | -0.903598914 | -2.276370438 |
| H | 7.940678606  | 0.494485390  | -1.836912574 |
| H | 5.412675612  | 6.599182730  | -4.221908633 |
| H | 3.776946982  | 8.297255702  | -4.946955446 |
| H | 2.496615161  | 7.070451372  | -5.009599563 |
| H | 3.239353294  | 7.498926549  | -3.458369814 |
| H | 5.123885069  | 7.022059830  | -6.648650168 |
| H | 5.585927237  | 5.336710740  | -6.343991011 |
| H | 3.902588381  | 5.740305677  | -6.745293571 |
| H | 7.582075778  | 5.624983024  | -3.586979407 |
| H | 7.871291486  | 5.223497255  | -1.155993274 |
| H | 6.336868737  | 4.548827916  | -1.737652256 |
| H | 7.714984716  | 3.476078295  | -1.406978333 |
| H | 9.865591764  | 5.348049215  | -2.683964918 |

|   |              |              |              |
|---|--------------|--------------|--------------|
| H | 9.786310113  | 3.597986935  | -2.965911695 |
| H | 9.760389316  | 4.718961515  | -4.338247371 |
| H | 1.088479557  | -5.767206740 | -1.852491957 |
| H | 3.514310975  | -6.213648444 | -1.114153176 |
| H | -0.121388650 | -4.501677908 | -0.091172407 |
| H | 1.444402902  | -3.753797200 | -0.460475873 |
| H | -0.056898986 | -3.031957098 | -1.080425587 |
| H | -1.382225937 | -5.757268761 | -1.868746202 |
| H | -1.389908675 | -4.316701067 | -2.904679374 |
| H | -0.740932438 | -5.846632014 | -3.519289407 |
| H | 4.673827346  | -7.568509828 | -2.841208456 |
| H | 3.887475673  | -6.150602246 | -3.561435338 |
| H | 5.647235367  | -6.163762976 | -3.313496414 |
| H | 5.534597453  | -7.477476758 | -0.473328577 |
| H | 6.561753325  | -6.092308703 | -0.890073070 |
| H | 5.416343134  | -5.972620669 | 0.456765056  |
| H | 6.840457575  | -0.954096141 | -0.039624703 |
| H | 8.142166036  | -2.919896375 | 0.755408895  |
| H | 7.519178071  | -3.190832988 | -0.875191554 |
| H | 9.226443488  | -2.783938456 | -0.638682844 |
| H | 8.732936234  | -0.624472327 | 1.541251799  |
| H | 9.842963842  | -0.386925955 | 0.181689986  |
| H | 8.536305503  | 0.773674156  | 0.473554793  |



**Stage 4**

**Table S44: *i*-C<sub>4</sub>H<sub>9</sub>-TTT-AS-T-TS inclusion *trans*-C<sub>4</sub>H<sub>8</sub> in polymer. Transition state**

| Atom | x            | y            | z            |
|------|--------------|--------------|--------------|
| C    | 1.358854844  | -4.110255329 | -3.221099007 |
| Al   | 3.171367977  | -3.502237190 | -2.731343857 |
| Cl   | 4.205451253  | -2.986601761 | -4.756311238 |
| Nd   | 3.760748591  | -0.127074028 | -4.556881410 |
| C    | 2.731332951  | -1.256857762 | -8.291349572 |
| C    | 4.510446130  | -4.338855672 | -1.548294148 |
| Cl   | 3.009463443  | -1.275458900 | -2.085752486 |
| Cl   | 4.760788682  | 2.094625134  | -6.017776531 |
| Al   | 5.311876327  | 3.454468391  | -4.165567602 |
| C    | 4.023765317  | 4.944184035  | -4.078496767 |
| Cl   | 4.582636947  | 1.871032443  | -2.653670984 |
| C    | 7.285674967  | 3.556597433  | -4.160177979 |
| H    | 0.775459197  | -3.242817133 | -3.558551610 |
| H    | 1.433951459  | -4.773559586 | -4.094168709 |
| H    | 5.508454497  | -4.009806850 | -1.862715842 |
| H    | 4.376382144  | -3.950853594 | -0.529082194 |
| H    | 7.705569365  | 2.582205647  | -3.882717605 |
| H    | 7.628489244  | 3.743601889  | -5.187747978 |
| H    | 3.074286267  | 4.634271121  | -4.533361742 |
| H    | 3.797768342  | 5.134960395  | -3.019935782 |
| H    | 2.538771113  | -1.683315066 | -9.284146034 |
| H    | 2.668513164  | -0.167650238 | -8.401438524 |
| C    | 1.664639951  | -1.778089436 | -7.307431888 |
| C    | 1.625392787  | -1.071241756 | -5.972232977 |
| C    | 1.433240572  | 0.284564693  | -5.808316054 |
| C    | 1.458586672  | 0.937295703  | -4.563345575 |
| H    | 1.833282762  | -2.842951030 | -7.133709982 |
| H    | 0.682171175  | -1.703775392 | -7.788131202 |
| H    | 1.422005376  | -1.708999404 | -5.111682751 |
| H    | 1.511539925  | 0.913297566  | -6.694770334 |
| H    | 1.295611652  | 1.980869409  | -4.729662137 |
| H    | 0.711610360  | 0.411214948  | -4.000645855 |
| C    | 0.804691695  | 1.837333596  | -2.709048667 |
| C    | 1.478960573  | 2.084953463  | -1.581071145 |
| C    | 1.411363469  | 1.260533911  | -0.387290619 |
| C    | 2.091782709  | 1.508171216  | 0.736872268  |
| H    | 2.015133900  | 0.861806825  | 1.601783482  |
| H    | 2.753503398  | 2.363023043  | 0.819511858  |
| H    | 0.761819209  | 0.389467136  | -0.436278757 |
| H    | 2.135882177  | 2.949120136  | -1.532669540 |
| H    | 0.800566664  | 2.748949494  | -3.305176151 |
| H    | -0.089855083 | 1.379820493  | -2.486819989 |
| C    | 4.132091442  | -1.652985399 | -7.902707093 |

|   |              |              |              |
|---|--------------|--------------|--------------|
| C | 5.164914917  | -0.814653196 | -7.860474315 |
| C | 6.592474840  | -1.261631750 | -7.707851870 |
| C | 7.350925888  | -0.576101675 | -6.557766639 |
| H | 7.143656030  | 0.500019202  | -6.552115516 |
| H | 8.423635305  | -0.702759545 | -6.747265593 |
| H | 5.026085785  | 0.244151423  | -8.071801362 |
| H | 4.281250972  | -2.720054956 | -7.744907685 |
| H | 7.110540986  | -1.018049481 | -8.642533908 |
| H | 6.637494462  | -2.348033748 | -7.578556328 |
| C | 0.566551327  | -4.833896708 | -2.121721156 |
| C | -0.827856942 | -5.213030686 | -2.635088688 |
| C | 7.059687808  | -1.186561769 | -5.215734926 |
| C | 6.895108451  | -0.493488857 | -4.089410792 |
| C | 6.822977407  | -1.115418087 | -2.719320459 |
| C | 7.971696788  | -0.601320565 | -1.839966957 |
| C | 7.873137832  | -1.102512667 | -0.389690052 |
| C | 8.212528849  | -2.592571589 | -0.282774513 |
| C | 4.490687737  | -5.873526989 | -1.498260080 |
| C | 5.571254044  | -6.388799393 | -0.540009414 |
| C | 4.488732918  | 6.259719881  | -4.719474322 |
| C | 3.431706278  | 7.352957932  | -4.522554635 |
| C | 7.895464929  | 4.625792548  | -3.241482567 |
| C | 9.426545868  | 4.569568587  | -3.310149051 |
| C | 0.447323757  | -3.976270123 | -0.859981055 |
| C | 4.690377952  | -6.478554287 | -2.889605590 |
| C | 7.428518812  | 4.456997313  | -1.794052332 |
| C | 4.791497423  | 6.080553252  | -6.208535830 |
| C | 8.806695158  | -0.282711826 | 0.508037785  |
| H | 7.085862403  | -2.274943163 | -5.187185535 |
| H | 6.960719568  | 0.596310429  | -4.104019400 |
| H | 5.875678672  | -0.852412170 | -2.228007696 |
| H | 6.871712352  | -2.206161362 | -2.806374307 |
| H | 8.929576815  | -0.903598914 | -2.276370438 |
| H | 7.940678606  | 0.494485390  | -1.836912574 |
| H | 5.412675612  | 6.599182730  | -4.221908633 |
| H | 3.776946982  | 8.297255702  | -4.946955446 |
| H | 2.496615161  | 7.070451372  | -5.009599563 |
| H | 3.239353294  | 7.498926549  | -3.458369814 |
| H | 5.123885069  | 7.022059830  | -6.648650168 |
| H | 5.585927237  | 5.336710740  | -6.343991011 |
| H | 3.902588381  | 5.740305677  | -6.745293571 |
| H | 7.582075778  | 5.624983024  | -3.586979407 |
| H | 7.871291486  | 5.223497255  | -1.155993274 |
| H | 6.336868737  | 4.548827916  | -1.737652256 |
| H | 7.714984716  | 3.476078295  | -1.406978333 |
| H | 9.865591764  | 5.348049215  | -2.683964918 |

|   |              |              |              |
|---|--------------|--------------|--------------|
| H | 9.786310113  | 3.597986935  | -2.965911695 |
| H | 9.760389316  | 4.718961515  | -4.338247371 |
| H | 1.088479557  | -5.767206740 | -1.852491957 |
| H | 3.514310975  | -6.213648444 | -1.114153176 |
| H | -0.121388650 | -4.501677908 | -0.091172407 |
| H | 1.444402902  | -3.753797200 | -0.460475873 |
| H | -0.056898986 | -3.031957098 | -1.080425587 |
| H | -1.382225937 | -5.757268761 | -1.868746202 |
| H | -1.389908675 | -4.316701067 | -2.904679374 |
| H | -0.740932438 | -5.846632014 | -3.519289407 |
| H | 4.673827346  | -7.568509828 | -2.841208456 |
| H | 3.887475673  | -6.150602246 | -3.561435338 |
| H | 5.647235367  | -6.163762976 | -3.313496414 |
| H | 5.534597453  | -7.477476758 | -0.473328577 |
| H | 6.561753325  | -6.092308703 | -0.890073070 |
| H | 5.416343134  | -5.972620669 | 0.456765056  |
| H | 6.840457575  | -0.954096141 | -0.039624703 |
| H | 8.142166036  | -2.919896375 | 0.755408895  |
| H | 7.519178071  | -3.190832988 | -0.875191554 |
| H | 9.226443488  | -2.783938456 | -0.638682844 |
| H | 8.732936234  | -0.624472327 | 1.541251799  |
| H | 9.842963842  | -0.386925955 | 0.181689986  |
| H | 8.536305503  | 0.773674156  | 0.473554793  |

#### Stage 4

**Table S45: *i*-C<sub>4</sub>H<sub>9</sub>-CCCC-AS addition *cis*-C<sub>4</sub>H<sub>8</sub> chain in polymer.**

| Atom | x                 | y                 | z                 |
|------|-------------------|-------------------|-------------------|
| C    | 0.93070057878033  | -0.77916153005263 | -0.30878357549477 |
| Al   | -0.31643128945286 | -1.26208815804208 | 1.14025784096961  |
| Cl   | 0.95021029868150  | -0.89927515656109 | 3.09486325497666  |
| Nd   | -0.40631152020174 | 1.46688808753437  | 3.77446368977586  |
| C    | -1.41424507304567 | -2.87671500546997 | 1.42599879909218  |
| Cl   | -1.78327136106967 | 0.50489181954937  | 1.51680139068292  |
| Cl   | 1.41747263199830  | 2.55101058239321  | 1.79884684321722  |
| Al   | 0.22699662863826  | 4.49589586259968  | 1.49037181925713  |
| C    | -0.82345286024746 | 4.34271946188678  | -0.17209992765402 |
| Cl   | -1.32897697836307 | 4.04492213257131  | 3.22082053014315  |
| C    | 1.40051608722509  | 5.94440272092600  | 2.14505680318436  |
| H    | 1.07311909985369  | 0.30876646064335  | -0.27613454427506 |
| H    | 1.91147123087435  | -1.21569451074919 | -0.07346703634729 |
| H    | -1.62444833148881 | -2.96069109718254 | 2.50108968010461  |
| H    | -2.38864310896647 | -2.71090851329908 | 0.94527962021835  |
| H    | 1.44055161988886  | 5.89694918835615  | 3.24122827895032  |
| H    | 2.42309111516675  | 5.73506357249813  | 1.80065162526284  |
| H    | -1.07439860654808 | 3.28189666877710  | -0.30710021864589 |
| H    | -1.78248271784429 | 4.86168081253253  | -0.03664820343016 |
| C    | 2.58524524487724  | 5.51534877041696  | 6.17202847716230  |
| H    | 2.98727328008449  | 5.79185192247079  | 5.19174458629780  |
| H    | 2.12546292480830  | 6.41595211028712  | 6.59403855954147  |
| C    | 1.60292816787651  | 1.36119221355041  | 6.87930217255440  |
| C    | 2.06935634189468  | 1.97608205793590  | 5.58768909452994  |
| C    | 1.98663431380392  | 3.26171639992238  | 5.21526634644010  |
| C    | 1.48856285228167  | 4.43277863255305  | 6.00241506984832  |
| H    | 2.34831350136040  | 0.63878372496829  | 7.22143494152869  |
| H    | 1.50815373614619  | 2.11648272402012  | 7.66116177274021  |
| H    | 2.52969732057554  | 1.28352772004329  | 4.88151514280047  |
| H    | 2.36160108807014  | 3.51375559684965  | 4.22779780939194  |
| H    | 0.64673282126148  | 4.87757857303171  | 5.46205349264591  |
| H    | 1.10895385248905  | 4.12960892778463  | 6.97844976181381  |
| C    | -2.34670762705677 | 0.10010256904926  | 5.06550215725145  |
| C    | -2.10249336224263 | 1.22460897582531  | 5.84055058859019  |
| C    | -0.86629671101041 | 1.61723320300499  | 6.35561865180014  |
| C    | 0.24776969808295  | 0.64756396954206  | 6.70068520752353  |
| H    | 0.00110020334987  | 0.08851703558630  | 7.61208121038902  |
| H    | 0.36717936234704  | -0.14396229527180 | 5.94095576774147  |
| H    | -0.82358016895616 | 2.57072299617348  | 6.86945539880444  |
| H    | -2.87295614051317 | 1.99491497369657  | 5.83170814351275  |
| H    | -3.31215513611976 | -0.03890611540251 | 4.59988658377844  |
| H    | -1.74179367166437 | -0.79824026592122 | 5.15805592439116  |
| C    | 6.27407815294130  | 5.45799423476378  | 4.82114754996405  |

|   |                   |                   |                   |
|---|-------------------|-------------------|-------------------|
| H | 7.02117212707684  | 5.67714339827856  | 5.58870740916739  |
| H | 6.80354990149037  | 5.10214038686705  | 3.93103428016972  |
| C | 3.69659091139656  | 5.06854194383344  | 7.08499740171538  |
| C | 4.86793671844316  | 4.56137017484388  | 6.71740139899718  |
| H | 3.47875345549142  | 5.17306524518383  | 8.14591773331771  |
| H | 5.58694563260016  | 4.29974370887809  | 7.49041769481499  |
| C | 5.35210021978433  | 4.31948362738238  | 5.31497035890682  |
| H | 5.92198238908821  | 3.38514947860733  | 5.29970412650381  |
| H | 4.51647572803596  | 4.21202338532761  | 4.61766198275017  |
| C | 5.48062696992743  | 6.67859733837197  | 4.44945234170540  |
| C | 5.42631915485783  | 7.83253773188828  | 5.10553599491695  |
| H | 4.88548838865051  | 6.56028348132210  | 3.54623870040222  |
| H | 4.80914098100370  | 8.63409198638347  | 4.70640224362006  |
| C | 6.17951088546250  | 8.19544452486973  | 6.35474917233224  |
| C | 7.33735257260740  | 9.15132356618010  | 6.01578842621530  |
| H | 5.49012818316963  | 8.68542309937707  | 7.04994424205159  |
| H | 6.57739383933023  | 7.30562742869353  | 6.85178899637192  |
| H | 7.97482065158739  | 8.66917709920784  | 5.26679622750734  |
| H | 6.93528402114096  | 10.06558900431154 | 5.56551806257476  |
| C | 0.53242241786331  | -1.20080548507321 | -1.72845703239051 |
| C | 1.60175203401017  | -0.75076027755312 | -2.73148886052305 |
| C | -0.83258411107527 | -0.63203865606903 | -2.12020711342557 |
| C | -0.83252525548479 | -4.20313977063280 | 0.91752691893736  |
| C | -1.79903547018948 | -5.35467512142571 | 1.22141355768898  |
| C | 0.53808168898309  | -4.48967777303814 | 1.53422883100107  |
| C | -0.15710613870769 | 4.86958838238204  | -1.45027816330708 |
| C | -1.05923641197683 | 4.60686322858754  | -2.66231697389446 |
| C | 1.02272437429333  | 7.37056772852696  | 1.72190762324776  |
| C | 2.03241645085587  | 8.37765459019210  | 2.28572922757701  |
| C | -0.39223513359619 | 7.73331067632147  | 2.17727775421172  |
| C | 1.21806035133357  | 4.23702662191912  | -1.67346462772497 |
| H | -0.02097975137289 | 5.96086223793715  | -1.36498068600040 |
| H | -0.60681366650934 | 5.01234110500343  | -3.56884291173698 |
| H | -1.21174132819994 | 3.53419196085440  | -2.79602133219915 |
| H | -2.03116749914273 | 5.08025809120309  | -2.51487219328994 |
| H | 1.67323886511325  | 4.61996776113906  | -2.58817317075190 |
| H | 1.88184560890628  | 4.47283070422507  | -0.83239373962849 |
| H | 1.13375452066297  | 3.15054474228737  | -1.75640601509392 |
| H | 1.05778495978965  | 7.44479672125223  | 0.62190439688777  |
| H | -0.64623132990933 | 8.74837125105513  | 1.86795084056177  |
| H | -1.11922422758339 | 7.04421864933668  | 1.73064215004960  |
| H | -0.47593391246592 | 7.67006972939059  | 3.26502469498275  |
| H | 1.77932811745330  | 9.39065489434848  | 1.96850540984402  |
| H | 2.03459739602580  | 8.34196883422997  | 3.37674145019800  |
| H | 3.03531551645813  | 8.14116645192501  | 1.92698360561116  |
| H | 0.47142148210032  | -2.30136477051271 | -1.77771544186813 |

|   |                   |                   |                   |
|---|-------------------|-------------------|-------------------|
| H | -0.71056974962556 | -4.14989064860786 | -0.17708587276023 |
| H | -1.09759602829422 | -0.93271500244247 | -3.13498461887284 |
| H | -1.60482066354993 | -1.00503159693760 | -1.43605126508770 |
| H | -0.82333327447437 | 0.45985126944046  | -2.07215281347389 |
| H | 1.33999502643060  | -1.07659926355152 | -3.73948486005040 |
| H | 1.69293819920914  | 0.33698493246023  | -2.72646025334130 |
| H | 2.56827255481521  | -1.18155599801345 | -2.46515115936669 |
| H | 0.93482465254717  | -5.43618916966629 | 1.16381612114188  |
| H | 1.24320721013676  | -3.69228482125676 | 1.26972505924380  |
| H | 0.46771165503452  | -4.54486573729227 | 2.62340308182256  |
| H | -1.40282746058166 | -6.29619258873763 | 0.83763046564731  |
| H | -1.94964498098905 | -5.44995073862823 | 2.29838129592643  |
| H | -2.76526117733862 | -5.16486561555350 | 0.75124250218809  |
| C | 8.19462900142008  | 9.51090243872301  | 7.24083623673073  |
| C | 9.48109320408715  | 10.21068123609717 | 6.78579816981573  |
| C | 7.43118342607883  | 10.40279218578102 | 8.22595718578608  |
| H | 8.47372350494157  | 8.58072648891542  | 7.75708413925438  |
| H | 8.07237377594735  | 10.66365555322453 | 9.06912033219744  |
| H | 7.10778678356352  | 11.32454119093319 | 7.73894949206836  |
| H | 6.55172440091008  | 9.88845756638444  | 8.61433320634902  |
| H | 10.10331044682562 | 10.45554266821557 | 7.64772733370833  |
| H | 10.05232884211542 | 9.56116104407330  | 6.12115364577211  |
| H | 9.24848973744388  | 11.13425745102696 | 6.25282335026445  |

# Stage 4

**Table S46: *i*-C<sub>4</sub>H<sub>9</sub>-CCCT-AS addition *trans*-C<sub>4</sub>H<sub>8</sub> chain in polymer.**

| Atom | x                 | y                 | z                |
|------|-------------------|-------------------|------------------|
| C    | -1.08827737220684 | 3.55196048139414  | 1.08181652282169 |
| Al   | -1.27031449616967 | 2.41784117237359  | 2.68651668356730 |
| Cl   | 0.18414221939436  | 0.63191089197140  | 2.34303898537844 |
| Nd   | 2.31822350521760  | 1.77766280168263  | 3.86778930343182 |
| C    | -2.89140100764426 | 1.74927051591076  | 3.59183262798670 |
| Cl   | 0.04304307218947  | 3.32217581541179  | 4.39943858315076 |
| Cl   | 2.80998691174691  | 3.31301991067908  | 1.49729457066010 |
| Al   | 3.91600381938755  | 5.08114238076986  | 2.52929031770435 |
| C    | 2.64029507664811  | 6.57251901733007  | 2.72003293558558 |
| Cl   | 3.88788787480709  | 4.03510378100780  | 4.61520419100278 |
| C    | 5.75658512506601  | 4.99475078800829  | 1.80095684672321 |
| H    | -0.11403061752907 | 4.05458089591916  | 1.12733922466151 |
| H    | -1.03968750623446 | 2.89178023469381  | 0.20435828831734 |
| H    | -2.62492334488768 | 0.85731725488798  | 4.17493501404464 |
| H    | -3.21128663379638 | 2.50099187169011  | 4.32710697167827 |
| H    | 6.43247948817342  | 4.57521434735951  | 2.55683841289712 |
| H    | 5.73413947232413  | 4.26271301442276  | 0.98157420155337 |
| H    | 1.64852759001728  | 6.12979852097998  | 2.88586435372507 |
| H    | 2.87824434751919  | 7.11728739865855  | 3.64469322342553 |
| C    | 6.46297370940341  | 0.45226076570541  | 3.08204777863559 |
| H    | 6.67571959229838  | -0.62152517019510 | 3.12789545070725 |
| H    | 7.42730109600280  | 0.95327890848246  | 2.93923228055320 |
| C    | 3.97364851991587  | -1.67040621540665 | 3.60758133685920 |
| C    | 3.55872245343916  | -0.79735717645735 | 2.45197647201354 |
| C    | 4.19381755895177  | 0.17493150684592  | 1.77687243215054 |
| C    | 5.57042207426810  | 0.77867540791174  | 1.88284520882434 |
| H    | 4.36474646263541  | -2.61682980807965 | 3.21408055659808 |
| H    | 4.77935974067579  | -1.22344270050905 | 4.18568917909093 |
| H    | 2.56976854062078  | -1.04532401721010 | 2.06989079812092 |
| H    | 3.63623287384335  | 0.58942568225259  | 0.94072001908044 |
| H    | 6.09783542817287  | 0.50012609690668  | 0.96188764230854 |
| H    | 5.45349929382125  | 1.86557357766131  | 1.80589751322994 |
| C    | 2.76689258485405  | -1.94853036792703 | 4.52074777649920 |
| C    | 2.15509281454994  | -0.68129825567942 | 5.08711487703404 |
| C    | 2.80513935284774  | 0.13684021982605  | 5.99337126155304 |
| C    | 2.33565512161585  | 1.37248808418844  | 6.44793070682940 |
| H    | 2.94148875672901  | 1.97187705264595  | 7.11342147102058 |
| H    | 1.26254516484799  | 1.54838244474879  | 6.51556855216683 |
| H    | 3.85448167744283  | -0.08629882209679 | 6.18494578282574 |
| H    | 1.07100613782651  | -0.59275248649602 | 5.00896845976329 |
| H    | 2.00557863239422  | -2.47790851589152 | 3.94216087059436 |
| H    | 3.07055276150884  | -2.63158721495314 | 5.32146121047429 |
| C    | 8.86383733043745  | 1.28290698997851  | 6.16690265690469 |

|   |                   |                   |                   |
|---|-------------------|-------------------|-------------------|
| H | 8.54532910316034  | 1.81380068445077  | 7.06854237431278  |
| H | 9.81393515467195  | 0.78568709297456  | 6.38611248095297  |
| C | 5.88517304421687  | 0.91616214318144  | 4.39615970726369  |
| C | 6.46914061884939  | 0.80020964455393  | 5.58321954483839  |
| H | 4.89926326640395  | 1.39790149866039  | 4.32871619410225  |
| H | 5.97128946525457  | 1.19243819414817  | 6.46603988584516  |
| C | 7.81982698633929  | 0.19386080329976  | 5.83100078413035  |
| H | 7.75495744257611  | -0.49381536358323 | 6.68034931928403  |
| H | 8.15987868594420  | -0.37409607966683 | 4.96036071448074  |
| C | 9.04881307745971  | 2.22508156706296  | 5.00977617895704  |
| C | 8.51668318650532  | 3.43554825985929  | 4.88256100073647  |
| H | 9.65367809036175  | 1.82786947955840  | 4.19799740219390  |
| H | 8.71369057055295  | 3.99872641579856  | 3.97235387400144  |
| C | 7.64537536603527  | 4.14967447924682  | 5.87793543287548  |
| C | 8.06627530411061  | 5.61957379660504  | 6.01320036745731  |
| H | 6.60673455220265  | 4.09913968255544  | 5.52871876602916  |
| H | 7.68426087350862  | 3.66444899160537  | 6.85815074927055  |
| H | 9.13022912996173  | 5.65641601033198  | 6.27214805492452  |
| H | 7.94798862586251  | 6.11753109367559  | 5.04373240350263  |
| C | -2.18893967928709 | 4.59516269643868  | 0.85349667598062  |
| C | -1.91660856270611 | 5.37902767124130  | -0.43593473722377 |
| C | -2.30632819919596 | 5.55559318923287  | 2.03836801661174  |
| C | -4.08112035843090 | 1.41946451630320  | 2.67863518308077  |
| C | -5.25926491497208 | 0.89661986298182  | 3.50942571274176  |
| C | -3.69907840650670 | 0.39790070994160  | 1.60527769269227  |
| C | 2.55562880815573  | 7.57951281959723  | 1.56544282270080  |
| C | 1.46973178127797  | 8.62340215741512  | 1.85309609496380  |
| C | 6.36036138926790  | 6.29983818479196  | 1.26183459074990  |
| C | 7.70642993897224  | 6.01923446556741  | 0.58229583096223  |
| C | 6.54173595349986  | 7.33674017595010  | 2.37102153056022  |
| C | 2.28002087411749  | 6.88695789729779  | 0.22993328159054  |
| H | 3.51604865854277  | 8.11423456304531  | 1.47910176177174  |
| H | 1.42513212492918  | 9.35922284613383  | 1.04842699714063  |
| H | 0.49422408506412  | 8.14140138174799  | 1.94244754611239  |
| H | 1.68746923116237  | 9.14129239679939  | 2.78851547764995  |
| H | 2.22743987701490  | 7.61697423859002  | -0.57924148470987 |
| H | 3.08293532794478  | 6.17527656068764  | 0.00242236508880  |
| H | 1.33370650080792  | 6.34199975676843  | 0.26807617293399  |
| H | 5.68665942197928  | 6.72803351635577  | 0.50058542228067  |
| H | 6.91855448000113  | 8.27554085218487  | 1.96201934832111  |
| H | 5.58408471788015  | 7.53392339170238  | 2.86483016639400  |
| H | 7.24973971227456  | 6.97736681720215  | 3.12068901399501  |
| H | 8.13423208414122  | 6.94251176247214  | 0.18788477280671  |
| H | 8.40848702913454  | 5.58427251149961  | 1.29618405415801  |
| H | 7.57069573863952  | 5.31752211818295  | -0.24223681663360 |
| H | -3.15799740343606 | 4.08148666081042  | 0.73215592675202  |



|   |                   |                   |                   |
|---|-------------------|-------------------|-------------------|
| H | -4.41410957240969 | 2.33961166943638  | 2.17056386384446  |
| H | -3.09040704121158 | 6.29285402279924  | 1.85946490518360  |
| H | -2.55518880001521 | 4.99991965461376  | 2.95064685851128  |
| H | -1.36326435869922 | 6.08342420474215  | 2.19991327939325  |
| H | -2.71785136646606 | 6.09565219205323  | -0.62371377960045 |
| H | -0.97276473443729 | 5.92173594212508  | -0.35619039394769 |
| H | -1.85315122824503 | 4.69502321210027  | -1.28366437695373 |
| H | -4.55551715696812 | 0.17223093313307  | 0.96792208308008  |
| H | -2.89563060513661 | 0.79796486755098  | 0.97457629631824  |
| H | -3.35182885867487 | -0.53207239059913 | 2.06244321086057  |
| H | -6.11725572757577 | 0.69260933403091  | 2.86677698853095  |
| H | -4.98103331108902 | -0.02355091048833 | 4.02648406276284  |
| H | -5.54966046379945 | 1.63951497104116  | 4.25400539064768  |
| C | 7.27336894817655  | 6.38327463668218  | 7.08602379143002  |
| C | 7.88713737297855  | 7.77479516405011  | 7.28220552968672  |
| C | 5.78931090872313  | 6.51007732037561  | 6.72905939381429  |
| H | 7.35520970954344  | 5.83366834785417  | 8.03528237323851  |
| H | 5.27415485415547  | 7.11080680789088  | 7.47984848769661  |
| H | 5.66737481776617  | 6.99440208380721  | 5.75650138440103  |
| H | 5.31364877007321  | 5.52953535384150  | 6.69420796022839  |
| H | 7.35201650168242  | 8.31794552240141  | 8.06222026540178  |
| H | 8.93446880952065  | 7.69158886969771  | 7.57566555648982  |
| H | 7.83083210173130  | 8.35154545719648  | 6.35707672619635  |

# Stage 4

**Table S47: *i*-C<sub>4</sub>H<sub>9</sub>-TTTT-AS addition *trans*-C<sub>4</sub>H<sub>8</sub> chain in polymer.**

| Atom | x                 | y                 | z                  |
|------|-------------------|-------------------|--------------------|
| C    | 0.66947071548027  | -3.49796923870675 | -2.86688414030990  |
| Al   | 2.60531759993643  | -3.15370119202989 | -2.71489378720448  |
| Cl   | 3.14786089060886  | -2.03322852768166 | -4.68359161247603  |
| Nd   | 2.81880370218794  | 0.54824836297373  | -3.55400830265719  |
| C    | 3.55671976220175  | 0.76455298657972  | -9.18925384236129  |
| C    | 4.09034822118848  | -4.34464174890802 | -2.20744075692055  |
| Cl   | 2.82587235894625  | -1.22052803847302 | -1.38832927332059  |
| Cl   | 4.14654931913112  | 2.05286750784204  | -5.49392456536125  |
| Al   | 5.05045616778007  | 3.59805894988066  | -3.94993321663235  |
| C    | 3.79862917115485  | 5.11921273485325  | -3.85464274203063  |
| Cl   | 4.50887178614686  | 2.29582832434050  | -2.09024758855117  |
| C    | 6.99473822130312  | 3.55796036162505  | -4.27250191450688  |
| H    | 0.15188736693299  | -2.53076348612491 | -2.80725306052054  |
| H    | 0.45916835898161  | -3.88574782826957 | -3.87317584805391  |
| H    | 5.02752357306026  | -3.91007010152548 | -2.57677404219070  |
| H    | 4.17486776391727  | -4.35438605195662 | -1.11218550770233  |
| H    | 7.40273836370313  | 2.62563077438663  | -3.86432921810632  |
| H    | 7.16466385235354  | 3.50831394441175  | -5.35688194986646  |
| H    | 2.79435494515120  | 4.76551437806688  | -4.12366786994928  |
| H    | 3.72827271323090  | 5.43756202055985  | -2.80510371965083  |
| H    | 3.81931482849562  | 1.42554839321553  | -10.02380990575445 |
| H    | 3.63444429982311  | 1.34927004924329  | -8.26628741320233  |
| C    | 2.10185586240216  | 0.26826923219285  | -9.37218775586105  |
| C    | 1.60920113127651  | -0.53672706309734 | -8.20536230164234  |
| C    | 0.45545053939605  | -0.35808540808062 | -7.56807365911733  |
| C    | -0.03498380357125 | -1.18696289657165 | -6.41616945915047  |
| H    | 2.05486195422385  | -0.34263627805146 | -10.28229297859514 |
| H    | 1.43961892460833  | 1.12276805475738  | -9.53689968843046  |
| H    | 2.27035851572422  | -1.33676436354040 | -7.87369721093635  |
| H    | -0.20985305395701 | 0.43900967104601  | -7.90150824671635  |
| H    | -0.83814794991851 | -1.84793806922837 | -6.76428050145892  |
| H    | 0.76859815511052  | -1.83382087922007 | -6.06167892187207  |
| C    | -0.60134983038627 | -0.35347250778272 | -5.25522852314661  |
| C    | 0.32425935255061  | 0.69242009956997  | -4.68132600827906  |
| C    | 0.20311338548013  | 1.16657770223907  | -3.39031236706504  |
| C    | 0.99676280394557  | 2.17559858924333  | -2.82227431454896  |
| H    | 0.87707529894475  | 2.43492780300834  | -1.77836267927165  |
| H    | 1.35979788095058  | 2.98600932518681  | -3.45512232207552  |
| H    | -0.39175402675391 | 0.56254627701494  | -2.70436235669689  |
| H    | 0.80438632300093  | 1.34377531115694  | -5.41917226378671  |
| H    | -1.50874586596314 | 0.15070803335007  | -5.61569154063600  |
| H    | -0.92904253083262 | -1.02771312721384 | -4.45875245511642  |
| C    | 4.53494007656382  | -0.38097120079501 | -9.15299337698447  |

|   |                   |                   |                    |
|---|-------------------|-------------------|--------------------|
| C | 5.05576183554782  | -0.88243105429276 | -8.04016260424812  |
| C | 6.00621119689489  | -2.04690026117085 | -8.02126505956873  |
| C | 7.23068667659230  | -1.77348112438781 | -7.12434427676792  |
| H | 7.65886329704928  | -0.79760396845530 | -7.37591178540041  |
| H | 7.98558886548602  | -2.53984316378536 | -7.33045547873256  |
| H | 4.81227315448764  | -0.45504212056756 | -7.06920668123908  |
| H | 4.77411617919123  | -0.81919017883616 | -10.12005016679969 |
| H | 6.34510749534376  | -2.27016425829557 | -9.03815653871780  |
| H | 5.48417817226558  | -2.93485480631003 | -7.64338691327962  |
| C | 0.05956596989453  | -4.45630902805538 | -1.83363760014320  |
| C | -1.45473646589965 | -4.57017648444917 | -2.04782793104846  |
| C | 6.85707359666736  | -1.83009460688139 | -5.67155185756682  |
| C | 6.85919313715897  | -0.78673531332135 | -4.85320868015926  |
| C | 6.44106719854447  | -0.86183773592435 | -3.41292243482073  |
| C | 7.53003280409512  | -0.32866933270904 | -2.47492004465322  |
| C | 7.08606210335072  | -0.28378017731095 | -1.00396270323306  |
| C | 6.99880574867712  | -1.68655933995383 | -0.39561561674325  |
| C | 3.98249551040742  | -5.79272193591863 | -2.70568646349630  |
| C | 5.21602438457148  | -6.59293409577331 | -2.27057287328795  |
| C | 4.14137836294167  | 6.34067251386798  | -4.71945057786493  |
| C | 3.08531102778941  | 7.43641882262653  | -4.52973950508781  |
| C | 7.78936308317728  | 4.74129515044045  | -3.70272870972219  |
| C | 9.28214009667716  | 4.56997114383845  | -4.00868449016782  |
| C | 0.35595795074775  | -4.00532469212664 | -0.40175368814547  |
| C | 3.82538704983162  | -5.85242421243317 | -4.22660256662936  |
| C | 7.57320082412986  | 4.88758242135651  | -2.19522948719446  |
| C | 4.25144545817820  | 5.96415864413041  | -6.19835775414965  |
| C | 8.05465760024022  | 0.58405927383121  | -0.19349036739939  |
| H | 6.54043745608873  | -2.80851543259126 | -5.31283246644568  |
| H | 7.17631591180523  | 0.19559462962872  | -5.20102181267040  |
| H | 5.52602811243084  | -0.25272996344040 | -3.27725294739411  |
| H | 6.19405376016363  | -1.89743380682736 | -3.15260625561312  |
| H | 8.42583812564314  | -0.95095941999577 | -2.57455534674322  |
| H | 7.79839345690413  | 0.68560678886905  | -2.79389584955292  |
| H | 5.11197973039816  | 6.75371820663808  | -4.39759934779626  |
| H | 3.34008321631278  | 8.31838276029537  | -5.11958938878412  |
| H | 2.10358002795638  | 7.07615800267122  | -4.84302791172346  |
| H | 3.03012696955541  | 7.72364239896574  | -3.47848180903222  |
| H | 4.49709910914679  | 6.84030265991087  | -6.80038891501320  |
| H | 5.04105350435047  | 5.21582431197086  | -6.33848045848856  |
| H | 3.30911469489812  | 5.54610988180929  | -6.56121835410140  |
| H | 7.45333755088249  | 5.67297047730626  | -4.18786418895193  |
| H | 8.13863997307580  | 5.73589518422892  | -1.80652175806252  |
| H | 6.50963163250591  | 5.05408337554275  | -1.98249384282761  |
| H | 7.89555040512901  | 3.98551991656166  | -1.66969076839157  |
| H | 9.84954321836474  | 5.42079453017991  | -3.62807058516119  |

|   |                   |                   |                   |
|---|-------------------|-------------------|-------------------|
| H | 9.66213964511009  | 3.65795799163515  | -3.54449835919514 |
| H | 9.43651516525732  | 4.50147197165391  | -5.08674798894573 |
| H | 0.49351421286990  | -5.46055982371552 | -1.97237606028696 |
| H | 3.09721896648007  | -6.26846695507034 | -2.25151498391665 |
| H | -0.08735151313541 | -4.69583069497029 | 0.31734312692964  |
| H | 1.43926382844990  | -3.97889552525798 | -0.23208066827664 |
| H | -0.04913561960371 | -3.00678929812113 | -0.21934200613079 |
| H | -1.88880140831653 | -5.27796841106682 | -1.33976461961330 |
| H | -1.93168420395538 | -3.59794498955368 | -1.90926046992766 |
| H | -1.66352597076177 | -4.91732891496652 | -3.06102377377974 |
| H | 3.75170473278527  | -6.88721961399413 | -4.56470949526033 |
| H | 2.91321764741062  | -5.32400360896977 | -4.53108337641020 |
| H | 4.67961789234671  | -5.38491298399517 | -4.72249787670890 |
| H | 5.12960665679921  | -7.63186306854292 | -2.59296176460681 |
| H | 6.12024154372042  | -6.16383617345417 | -2.70644130770905 |
| H | 5.31062923566765  | -6.57135156744637 | -1.18369799947671 |
| H | 6.08941461780637  | 0.18004874781749  | -0.95533080290005 |
| H | 6.68170970781366  | -1.62464343297976 | 0.64629908623258  |
| H | 6.27549509886221  | -2.29929508756304 | -0.93667251372612 |
| H | 7.96964693910137  | -2.18412358150177 | -0.43343442087690 |
| H | 7.74271363817863  | 0.62563369085950  | 0.85090987368353  |
| H | 9.06637285863472  | 0.17688791022449  | -0.23777570321234 |
| H | 8.07271318831611  | 1.60143161663485  | -0.58876357214644 |

# Stage 5

**Table S48: *i*-C<sub>4</sub>H<sub>9</sub>-CCCC-AS-T**

| Atom | x                 | y                 | z                 |
|------|-------------------|-------------------|-------------------|
| C    | 2.11593837383047  | -0.51046411952339 | 1.78057019612311  |
| Al   | 0.32168856648916  | -1.27405802329670 | 2.11929502184030  |
| Cl   | 0.03258697871384  | -0.82764378466581 | 4.39782370223401  |
| Nd   | -0.56122524434056 | 1.91884212382064  | 3.86723883954699  |
| C    | -0.43205167546847 | -3.04365196573956 | 1.68156896413246  |
| Cl   | -1.21346901265806 | 0.31631925267549  | 1.48120957454803  |
| Cl   | 0.82854841863691  | 3.31745059792743  | 1.78789446839603  |
| Al   | -0.92963465677184 | 4.73973897674050  | 1.33779660070523  |
| C    | -2.03178671340701 | 3.94728127358928  | -0.09543121344194 |
| Cl   | -2.14442607003914 | 4.15603568085294  | 3.26852009586250  |
| C    | -0.20932121540944 | 6.55747620716710  | 1.60084938344475  |
| H    | 2.03679322141673  | 0.57989181220906  | 1.89983097491463  |
| H    | 2.80249019699692  | -0.84944384328840 | 2.56877432638591  |
| H    | -1.25420244665635 | -3.25450364657776 | 2.37874121937004  |
| H    | -0.89440912600193 | -2.97958096979990 | 0.68653904414619  |
| H    | 0.00879891292354  | 6.67651305095502  | 2.67126428452497  |
| H    | 0.76359204620053  | 6.61611330736999  | 1.09282225292520  |
| H    | -1.95605360872189 | 2.85666902120431  | 0.01105360393201  |
| H    | -3.08436489368376 | 4.19299342607274  | 0.10342965982810  |
| C    | 3.61695005569162  | 2.76382878257395  | 4.83480115968464  |
| H    | 4.30316361553038  | 1.91032015753525  | 4.80245301531377  |
| H    | 3.87805293723508  | 3.36410894464353  | 5.71187316412773  |
| C    | -0.53089794089867 | 2.12685306576553  | 6.51908313738906  |
| C    | 0.09313226494905  | 3.29240697235505  | 6.07170944401968  |
| C    | 1.16292980609825  | 3.34703424564528  | 5.19013817927745  |
| C    | 2.17322786572612  | 2.23657114140632  | 5.00636768649879  |
| H    | 2.13963270590239  | 1.54609403693389  | 5.85320114211253  |
| H    | 1.98070780821520  | 1.59377304029639  | 4.11702374653880  |
| H    | 1.43666041348473  | 4.31067370529113  | 4.78278654052525  |
| H    | -0.45325274889412 | 4.22259006829305  | 6.21124812845705  |
| H    | -1.40073527271493 | 2.20131603967475  | 7.15623723891969  |
| H    | 0.02973890986541  | 1.19885085253085  | 6.61618726207621  |
| C    | -3.29427845639704 | 1.02093604090205  | 5.10948270842568  |
| C    | -3.65401384051793 | 0.68309015199460  | 3.85962848015832  |
| C    | -4.44979879510186 | 1.51593311950154  | 2.97237844309238  |
| C    | -4.78555320028306 | 1.15383933808468  | 1.73265495022265  |
| H    | -2.74774481649594 | 0.33474654437816  | 5.74283358452482  |
| H    | -3.59395167430884 | 1.96489837146266  | 5.54971909991116  |
| H    | -3.34745646965300 | -0.28253310014851 | 3.46902715842128  |
| H    | -4.76740582866093 | 2.47867514479125  | 3.35999079296055  |
| H    | -4.46176395668925 | 0.20889195194469  | 1.31215609059868  |
| H    | -5.38053180737640 | 1.79705020065578  | 1.09746562978640  |
| C    | 5.10186152677950  | 6.43601461582665  | 5.00500868949363  |

|   |                   |                   |                   |
|---|-------------------|-------------------|-------------------|
| H | 5.63783622804359  | 6.78888769275100  | 4.12030134636146  |
| H | 4.93979184682004  | 7.29533137805059  | 5.66405792633239  |
| C | 3.79505751838902  | 3.56516497245216  | 3.57304208793705  |
| C | 3.83477062961904  | 4.88922139810405  | 3.47010423453969  |
| C | 3.71889823744778  | 5.89021364436516  | 4.58534874471801  |
| H | 3.89212285429827  | 2.96074775337451  | 2.67345507996036  |
| H | 3.99197712465361  | 5.32974115957039  | 2.48779128891826  |
| H | 3.10718963583502  | 6.73016249832540  | 4.24016838467011  |
| H | 3.23053396875845  | 5.45835011487607  | 5.46386359380930  |
| C | 8.92239349176603  | 5.93415973020509  | 4.23586200430936  |
| H | 9.54783699193378  | 5.54365944599561  | 5.04384218200034  |
| H | 9.51558942211413  | 5.92154691850400  | 3.31619327081733  |
| C | 5.88885558204891  | 5.39675600148910  | 5.75159461744472  |
| C | 6.98365215952434  | 4.77000712329870  | 5.33421692599732  |
| H | 5.47834939926473  | 5.14260273501720  | 6.72659416658385  |
| H | 7.44980468883610  | 4.03951086488699  | 5.99134928415792  |
| C | 7.70930203894242  | 4.99420144085656  | 4.03819148658578  |
| H | 8.07840160528209  | 4.03327605403964  | 3.66630078567435  |
| H | 7.04801961552775  | 5.41735121027531  | 3.27672078479857  |
| C | 8.48151852517018  | 7.34478747157571  | 4.51301862385243  |
| C | 8.34483290269561  | 7.91862709325466  | 5.70358218880307  |
| H | 8.22450027750334  | 7.91749151208181  | 3.62488048763439  |
| H | 8.00555139388577  | 8.95114165134661  | 5.75195185514459  |
| C | 8.62876796186730  | 7.29974191216154  | 7.04355923702308  |
| C | 9.77077783483675  | 8.04423990970001  | 7.75524331803488  |
| H | 7.71990561073310  | 7.36109284456564  | 7.65197464042872  |
| H | 8.88864785690757  | 6.24189744168826  | 6.94375548515200  |
| H | 10.64823366850901 | 8.04255238518753  | 7.09956621072843  |
| H | 9.48164333260380  | 9.08861452787226  | 7.91624307427502  |
| C | 2.75862637810892  | -0.79567705034731 | 0.41535807078248  |
| C | 4.06885945959875  | -0.01062615986068 | 0.27517355457041  |
| C | 1.81603286257259  | -0.44806929988947 | -0.73858237761451 |
| C | 0.55366071135468  | -4.22188098158145 | 1.69137363243940  |
| C | -0.17145626201298 | -5.52172920421558 | 1.32236535755502  |
| C | 1.23934650047899  | -4.36911286291375 | 3.05138827831973  |
| C | -1.69884045731111 | 4.33640810330095  | -1.54156973163111 |
| C | -2.59554451653669 | 3.55787329706349  | -2.51229309946309 |
| C | -1.08425538813142 | 7.72760140692427  | 1.12909035539376  |
| C | -0.40194401005149 | 9.06100992277387  | 1.45859614843438  |
| C | -2.47819765120191 | 7.67998527771432  | 1.75867832718477  |
| C | -0.22541338683973 | 4.08365134962800  | -1.86736047020311 |
| H | -1.90195628682288 | 5.41095518453547  | -1.68494785200153 |
| H | -2.38886674845605 | 3.85232488648479  | -3.54248097704916 |
| H | -2.42096921453676 | 2.48501377205779  | -2.41143116097878 |
| H | -3.64524442003145 | 3.76106688556445  | -2.29451244818970 |
| H | -0.00611535883883 | 4.36254817493341  | -2.89910420792550 |

|   |                   |                   |                   |
|---|-------------------|-------------------|-------------------|
| H | 0.41320125666582  | 4.68086292838073  | -1.20437395583962 |
| H | 0.02379346992091  | 3.02818173232984  | -1.73190459335089 |
| H | -1.20168654127022 | 7.67335219374289  | 0.03415976151768  |
| H | -3.08098784875603 | 8.52385022051188  | 1.41962369585534  |
| H | -2.98884024463673 | 6.75308334538276  | 1.47074463711882  |
| H | -2.41146758725190 | 7.71628078947623  | 2.84893277753956  |
| H | -1.00424055252553 | 9.89674418679824  | 1.09879664137827  |
| H | -0.26857398733649 | 9.16297387087904  | 2.53726504524997  |
| H | 0.57861336341405  | 9.10627974701060  | 0.98198315015488  |
| H | 3.00059019783383  | -1.86985249246444 | 0.34812344674944  |
| H | 1.33464233499707  | -4.04827280922009 | 0.93218988796485  |
| H | 2.29395152865501  | -0.64950526793064 | -1.69844460400868 |
| H | 0.90266000301382  | -1.05218687132105 | -0.67453687809671 |
| H | 1.53734979776300  | 0.60837547256502  | -0.70374342306768 |
| H | 4.56534541395592  | -0.26026103436774 | -0.66389738070483 |
| H | 3.87020743270662  | 1.06286528732720  | 0.29181812612069  |
| H | 4.74052468733524  | -0.25238269500577 | 1.10060737843466  |
| H | 1.93262846611673  | -5.21163552146618 | 3.04214032654870  |
| H | 1.80516724616126  | -3.45954635063684 | 3.28753459539693  |
| H | 0.50166879824447  | -4.53449403252350 | 3.84056977198739  |
| H | 0.53161758579772  | -6.35590865210273 | 1.29688793936271  |
| H | -0.95214808088545 | -5.74234192261831 | 2.05264468376000  |
| H | -0.63340885778554 | -5.42491683536923 | 0.33851706342754  |
| C | 10.15435619198363 | 7.39939227482630  | 9.09791778715350  |
| C | 11.45219575344449 | 8.02582413354521  | 9.62211387713907  |
| C | 9.04086219247493  | 7.54804279395125  | 10.14068119276990 |
| H | 10.33317686923295 | 6.32710389322410  | 8.93076269458754  |
| H | 9.35689444679825  | 7.11234145913476  | 11.08957240646324 |
| H | 8.80492156041146  | 8.60102861675380  | 10.30475075877944 |
| H | 8.13428851109567  | 7.03550013586031  | 9.81765520154354  |
| H | 11.74413763435006 | 7.55828514240025  | 10.56346532611992 |
| H | 12.25974319351010 | 7.88591272031038  | 8.90220613060333  |
| H | 11.32059199586940 | 9.09574214253979  | 9.79270734306966  |

**Stage 5**

**Table S49: *i*-C<sub>4</sub>H<sub>9</sub>-CCCC-AS-C**

| Atom | x                 | y                 | z                 |
|------|-------------------|-------------------|-------------------|
| C    | 2.01659621761587  | -0.72319642774895 | 1.76121276519482  |
| Al   | 0.21300409784725  | -1.46060487735350 | 2.10461736744340  |
| Cl   | -0.04813651012058 | -0.96199759001601 | 4.37801902853674  |
| Nd   | -0.65924432451361 | 1.75882707470405  | 3.79341840494446  |
| C    | -0.57375327409131 | -3.22803594433364 | 1.72408716966900  |
| Cl   | -1.31579589526426 | 0.12509717310002  | 1.42885134563846  |
| Cl   | 0.74375254732932  | 3.08349639156549  | 1.68455500309165  |
| Al   | -0.85431032580926 | 4.72124294421112  | 1.41069689260557  |
| C    | -1.80222713460297 | 4.42829043013405  | -0.29426359921386 |
| Cl   | -2.34752917732212 | 3.83063765993589  | 2.99994667950985  |
| C    | -0.02756232950760 | 6.33861664782376  | 2.18153789253508  |
| H    | 1.94996228702952  | 0.36868950391068  | 1.87434126256022  |
| H    | 2.69001444103912  | -1.06591485215328 | 2.55915642943829  |
| H    | -1.42809506945321 | -3.37273345634381 | 2.39947612769994  |
| H    | -0.99752955367189 | -3.20326832569389 | 0.71026915466020  |
| H    | 0.04731365825569  | 6.19423620091575  | 3.26825013568125  |
| H    | 1.00765346330159  | 6.38610810153077  | 1.81609338925330  |
| H    | -1.86870774963677 | 3.34264046903380  | -0.44995850143471 |
| H    | -2.83784720718748 | 4.77836599790452  | -0.18139561090725 |
| C    | 3.51609070999925  | 2.70670553542902  | 4.80565407364159  |
| H    | 4.20867521878409  | 1.85780720955900  | 4.82614755532151  |
| H    | 3.74462148481899  | 3.33945699471256  | 5.66897978162892  |
| C    | -0.66275227461786 | 2.12000862825811  | 6.41793496346727  |
| C    | -0.03641806484882 | 3.26605237290002  | 5.91976649780154  |
| C    | 1.04929253737814  | 3.28403181063975  | 5.05931141147964  |
| C    | 2.07057662361123  | 2.17410744192476  | 4.94713682575024  |
| H    | 2.01522578436309  | 1.51403353416977  | 5.81686095058320  |
| H    | 1.91109080152377  | 1.50337917262392  | 4.07309002962437  |
| H    | 1.32619322292902  | 4.22732516640574  | 4.60821094799247  |
| H    | -0.59312782976628 | 4.19761308426150  | 5.99889923353585  |
| H    | -1.54005659129598 | 2.22700050246266  | 7.04019272417229  |
| H    | -0.09363202763081 | 1.20665934792010  | 6.58629375894005  |
| C    | -3.34291408296508 | 0.77303640858416  | 5.11641968501715  |
| C    | -3.61760564692918 | 0.24191945616354  | 3.91539958690663  |
| C    | -4.49685036327927 | 0.81750440337587  | 2.89405025665912  |
| C    | -5.56815351913883 | 1.56941165725384  | 3.14636814119344  |
| H    | -2.74821799109731 | 0.23309316316568  | 5.84064423142860  |
| H    | -3.74502072504607 | 1.73143044873422  | 5.42298894168958  |
| H    | -3.15519603874532 | -0.70605533262227 | 3.65725519821255  |
| H    | -4.24826837851370 | 0.56977840297895  | 1.86730319447669  |
| H    | -5.87865658342911 | 1.80209864209783  | 4.15836901269643  |
| H    | -6.17655534629982 | 1.96536364789968  | 2.34341679242275  |
| C    | 5.04852525570575  | 6.37752234363493  | 4.88211170682664  |



|   |                   |                   |                   |
|---|-------------------|-------------------|-------------------|
| H | 5.61743657095666  | 6.65847890912901  | 3.99211300266454  |
| H | 4.88082207976737  | 7.28455391629083  | 5.47231143805142  |
| C | 3.73162504191634  | 3.46465488456316  | 3.52358540104685  |
| C | 3.79650378505341  | 4.78416641041522  | 3.38043334277855  |
| C | 3.66964449460115  | 5.82411757634418  | 4.45809256020179  |
| H | 3.83566522061550  | 2.83303144388230  | 2.64353215896582  |
| H | 3.98407611325117  | 5.18987457413248  | 2.38832697188642  |
| H | 3.07209686286029  | 6.65631174524112  | 4.07161979513304  |
| H | 3.15979872835001  | 5.42786769687365  | 5.34128965608479  |
| C | 8.87576830251279  | 5.74856064472726  | 4.24451557605164  |
| H | 9.45057130487850  | 5.45213645465544  | 5.12662081587223  |
| H | 9.51456275869497  | 5.61087241631131  | 3.36646137990171  |
| C | 5.79652102315114  | 5.38645359311603  | 5.72746681894898  |
| C | 6.89122240183708  | 4.71229381446594  | 5.39175048096906  |
| H | 5.35759864217577  | 5.21815330794784  | 6.70865510764853  |
| H | 7.32818032685986  | 4.03182468362564  | 6.11896835594353  |
| C | 7.65173902746510  | 4.81293365444782  | 4.10005654230341  |
| H | 8.01288360948011  | 3.81729294944270  | 3.82402021401237  |
| H | 7.01591922595151  | 5.17613133954185  | 3.28759548588112  |
| C | 8.45547480170893  | 7.19020847524710  | 4.31751124881518  |
| C | 8.31596506679020  | 7.92914790756125  | 5.41289063309317  |
| H | 8.22046513946171  | 7.63649843092483  | 3.35383392691312  |
| H | 7.99874737233070  | 8.96450560460610  | 5.30863179787703  |
| C | 8.57548074208500  | 7.50351537341446  | 6.83097400916512  |
| C | 9.79608349276024  | 8.24498859004031  | 7.40287412851975  |
| H | 7.69050216647230  | 7.74147553303379  | 7.43084322409892  |
| H | 8.74000072016070  | 6.42401646169533  | 6.89696899203284  |
| H | 10.66015387952702 | 8.03466059689316  | 6.76337259273170  |
| H | 9.61630275890590  | 9.32515758772496  | 7.36881194975234  |
| C | 2.66894974104374  | -1.02571385105673 | 0.40503878675185  |
| C | 3.99790226296761  | -0.26969382783700 | 0.28170932793798  |
| C | 1.74781934250631  | -0.66106875524199 | -0.76084518149546 |
| C | 0.36761043765999  | -4.43636429632032 | 1.83572869272484  |
| C | -0.39740951347728 | -5.73045544750662 | 1.53246120433632  |
| C | 1.01483608734068  | -4.52031318208889 | 3.21973966391564  |
| C | -1.19615046847273 | 5.08223693276526  | -1.54426422851297 |
| C | -2.00839572798420 | 4.69546662595628  | -2.78638034994809 |
| C | -0.70720877980580 | 7.68550302944517  | 1.89835121300186  |
| C | 0.06594423513395  | 8.81890078712364  | 2.58412467589304  |
| C | -2.16615185391105 | 7.68794084886666  | 2.35909646868312  |
| C | 0.27110919334729  | 4.69008286058806  | -1.73175321509781 |
| H | -1.24560203352884 | 6.17900244354836  | -1.44032854061152 |
| H | -1.60402517011422 | 5.18511440033125  | -3.67379341982822 |
| H | -1.97943293179608 | 3.61481384513544  | -2.93741985747459 |
| H | -3.04840791006640 | 5.00136187395214  | -2.66213241458254 |
| H | 0.67915634172107  | 5.15007809906307  | -2.63313709392586 |

|   |                   |                   |                   |
|---|-------------------|-------------------|-------------------|
| H | 0.86324152983503  | 5.02932303712642  | -0.87263796910511 |
| H | 0.37382632602646  | 3.60534907666786  | -1.81818038351834 |
| H | -0.69043156408473 | 7.87865451075395  | 0.81286403210429  |
| H | -2.63057373449667 | 8.65426951131665  | 2.15690835208197  |
| H | -2.73028699192228 | 6.91450472952176  | 1.82424359764389  |
| H | -2.23274285175490 | 7.48791421564702  | 3.43142445804495  |
| H | -0.39074582819187 | 9.78397626624827  | 2.35885966432860  |
| H | 0.06908775042959  | 8.67578365120428  | 3.66638950970710  |
| H | 1.09922553849327  | 8.83115482394282  | 2.23336193023631  |
| H | 2.88887833077924  | -2.10495599126314 | 0.34329469192866  |
| H | 1.17208328596279  | -4.34050745096786 | 1.08754271795178  |
| H | 2.23248684341283  | -0.87685557147585 | -1.71423330772982 |
| H | 0.82124321146758  | -1.24552467551557 | -0.70444567640167 |
| H | 1.49164460184196  | 0.40138439141926  | -0.73408203754546 |
| H | 4.49813202550118  | -0.52599837474777 | -0.65355287677372 |
| H | 3.82378182257113  | 0.80786601493445  | 0.30225609842177  |
| H | 4.65547864233334  | -0.53095099755506 | 1.11250817024890  |
| H | 1.67169717881779  | -5.38924885746686 | 3.28348636100366  |
| H | 1.61309771025688  | -3.62109860155812 | 3.41049239440151  |
| H | 0.25277718541741  | -4.60286466367304 | 3.99874123235746  |
| H | 0.27458214820287  | -6.58900731426394 | 1.57686997328471  |
| H | -1.20110864747161 | -5.87534287396078 | 2.25672419902750  |
| H | -0.83452475721722 | -5.68058109285221 | 0.53393031978745  |
| C | 10.12882534167024 | 7.82055437355329  | 8.84341430479622  |
| C | 11.50416046499305 | 8.36952262348737  | 9.24170470441741  |
| C | 9.06471940498903  | 8.29914983217618  | 9.83744297608620  |
| H | 10.17256266988783 | 6.72227366191189  | 8.88247659060612  |
| H | 9.34219329481650  | 8.00813036106228  | 10.85156800662087 |
| H | 8.96782104102854  | 9.38585066642124  | 9.80381842112009  |
| H | 8.09402587747750  | 7.85701546987180  | 9.61122168556408  |
| H | 11.75594064094187 | 8.05795622775107  | 10.25635579232474 |
| H | 12.27344953008098 | 7.99536365522425  | 8.56488932497665  |
| H | 11.50821072801186 | 9.46023023837859  | 9.20302156451276  |

# Stage 5

**Table S50: *i*-C<sub>4</sub>H<sub>9</sub>-TTTT-AS-T**

| Atom | x                 | y                 | z                 |
|------|-------------------|-------------------|-------------------|
| C    | 0.83759836809781  | -3.99777103589265 | -4.08521113659346 |
| Al   | 2.67380013041296  | -3.43084900605365 | -3.64196714609288 |
| Cl   | 3.35244257394528  | -1.97416404932338 | -5.30586762599864 |
| Nd   | 2.89720815971184  | 0.44865484556184  | -3.84003282026620 |
| C    | 4.17776071342306  | -4.56370468676058 | -3.05048183711840 |
| Cl   | 2.50587298136872  | -1.70258382585691 | -2.06127972597738 |
| Cl   | 4.05569377416637  | 1.49829852669837  | -6.19722389691519 |
| Al   | 5.22173968110591  | 3.22681135510938  | -5.14964460830775 |
| C    | 4.10770638866756  | 4.85266632940170  | -5.21707837974158 |
| Cl   | 4.83544414143135  | 2.35610264688230  | -3.01205387190915 |
| C    | 7.11826399103892  | 2.98362343189664  | -5.63426469137548 |
| H    | 0.17386416026812  | -3.12754392010919 | -4.00188721957583 |
| H    | 0.80572118647075  | -4.29280054797850 | -5.14278830089736 |
| H    | 5.12211860211666  | -4.03530320355793 | -3.22767444135139 |
| H    | 4.10656950873372  | -4.69020649524437 | -1.96105171315987 |
| H    | 7.51874719715865  | 2.12618613662795  | -5.08035170417136 |
| H    | 7.16737177119440  | 2.70154334063016  | -6.69531657708783 |
| H    | 3.05134821272541  | 4.55321544489586  | -5.20103555599035 |
| H    | 4.26736254211857  | 5.42217740327316  | -4.29065078178458 |
| C    | 0.01636710325732  | -1.59392293430494 | -6.83056359862268 |
| H    | -0.78438197538886 | -2.28799734706091 | -7.11763269448135 |
| H    | 0.83699575823733  | -2.19530889477986 | -6.43306225473382 |
| C    | -0.52535074539812 | -0.64079241045733 | -5.75213256489614 |
| C    | 0.42318038375295  | 0.45506093972703  | -5.33095124274823 |
| C    | 0.29105762417844  | 1.15428231864411  | -4.16148316470806 |
| C    | 1.12917064224782  | 2.21798865609710  | -3.73133965352611 |
| H    | 0.87239850213077  | 2.73262752358744  | -2.81441648357840 |
| H    | 1.54927082043784  | 2.87067975097606  | -4.49861733950948 |
| H    | -0.39270944641093 | 0.73767900496204  | -3.42014979079302 |
| H    | 1.01884821144203  | 0.89361776136962  | -6.13486840522747 |
| H    | -1.43648001331324 | -0.16740291803542 | -6.14117677932082 |
| H    | -0.84007732149549 | -1.21639497224426 | -4.87630776933151 |
| C    | 2.41334294807504  | 1.51625604711754  | -0.55382471434319 |
| C    | 3.46396318814638  | 1.06821594075926  | 0.14728427277186  |
| C    | 3.46767043828233  | -0.14054313296435 | 0.94936033909343  |
| C    | 4.49676476780459  | -0.52386499029776 | 1.71200747994017  |
| H    | 2.46420388808791  | 2.44673474264618  | -1.10069306241425 |
| H    | 1.46770774564174  | 0.98535033711219  | -0.55810362565476 |
| H    | 4.38526584394475  | 1.64530887822229  | 0.13533289677119  |
| H    | 2.56786421389847  | -0.74801774998992 | 0.91910937098765  |
| H    | 5.40610515681727  | 0.06402113033308  | 1.77175416314627  |
| H    | 4.45784479677786  | -1.42834633964340 | 2.30503979074461  |
| C    | 3.57633632607795  | 0.16341443035071  | -9.67166531080612 |

|   |                   |                   |                    |
|---|-------------------|-------------------|--------------------|
| H | 3.80581824644949  | 0.83585135498844  | -10.50475152388076 |
| H | 3.60966501460190  | 0.74431833674570  | -8.74436791863995  |
| C | 2.14681785967194  | -0.38310348046975 | -9.87116796467684  |
| C | 1.65933876741140  | -1.09363764364125 | -8.64171406908141  |
| C | 0.48961898282701  | -0.86096821318396 | -8.06047847018414  |
| H | 2.14835925600285  | -1.08028101364376 | -10.71748395134750 |
| H | 1.47450670784119  | 0.44428658893732  | -10.12049024985543 |
| H | 2.33825341360211  | -1.83845739373867 | -8.23139327383331  |
| H | -0.20310362946893 | -0.12647726011079 | -8.46620443004499  |
| C | 4.58976097546265  | -0.94651114030281 | -9.63667643048395  |
| C | 5.17067234661734  | -1.39398260926820 | -8.53057648740596  |
| C | 6.16221189705236  | -2.52409559308877 | -8.50762980691573  |
| C | 7.37789148593824  | -2.20213643031965 | -7.61529547613802  |
| H | 7.80012098964758  | -1.23449966747656 | -7.90635041933848  |
| H | 8.14025655128814  | -2.97083630168576 | -7.78192460713291  |
| H | 4.94540765463975  | -0.94816218481939 | -7.56436272755136  |
| H | 4.80995092398565  | -1.40391434643653 | -10.59923932285838 |
| H | 6.50690295945788  | -2.74433498346864 | -9.52329983417681  |
| H | 5.67272126308574  | -3.42727211819678 | -8.12127173517282  |
| C | 0.26318204136704  | -5.14680687538891 | -3.24392892027253  |
| C | -1.17125844825390 | -5.45978001522638 | -3.68795129590063  |
| C | 6.99106264473036  | -2.19576985330639 | -6.16495736552552  |
| C | 6.98557705031582  | -1.11859201563810 | -5.39174520524690  |
| C | 6.53320521385035  | -1.12805662818478 | -3.96056086832306  |
| C | 7.58046003994131  | -0.53819965803271 | -3.01118115160327  |
| C | 7.05820459465321  | -0.40670853132251 | -1.57188776806808  |
| C | 6.88554414020489  | -1.77390733864863 | -0.90385102985833  |
| C | 4.25475404591051  | -5.95292174794529 | -3.69884705838974  |
| C | 5.46887713610350  | -6.71994528780225 | -3.16092867892888  |
| C | 4.34432883367589  | 5.78510578850729  | -6.41393934701978  |
| C | 3.38590108170575  | 6.98063359276252  | -6.35130870072964  |
| C | 8.03264769667244  | 4.19449854696781  | -5.40375043455495  |
| C | 9.46285229878228  | 3.86685166682494  | -5.84954080354429  |
| C | 0.29006791477043  | -4.82223125591232 | -1.74887626497078  |
| C | 4.32506747604330  | -5.85845187516299 | -5.22425435305349  |
| C | 8.02450404595721  | 4.62855171737443  | -3.93669812614761  |
| C | 4.17874260574948  | 5.04544593379994  | -7.74330340091684  |
| C | 8.00694093110433  | 0.47166629567307  | -0.74987637578071  |
| H | 6.66574660118830  | -3.15694156794017 | -5.76884376682672  |
| H | 7.31341139736851  | -0.15467419061022 | -5.77829643242439  |
| H | 5.60696028248522  | -0.52564111491902 | -3.87691073365280  |
| H | 6.28980058124712  | -2.15331461689117 | -3.66090105897863  |
| H | 8.47797586690196  | -1.16546262275126 | -3.02687626431087  |
| H | 7.86616001218401  | 0.45566348625510  | -3.37634487490282  |
| H | 5.37329562244020  | 6.17919505841557  | -6.36812639254633  |
| H | 3.57264724693236  | 7.66327698913577  | -7.18179817221070  |

|   |                   |                   |                   |
|---|-------------------|-------------------|-------------------|
| H | 2.35001369170277  | 6.63996384246624  | -6.40294870294838 |
| H | 3.52653676509606  | 7.52286958243261  | -5.41498230333379 |
| H | 4.34259319883487  | 5.72286602941046  | -8.58277347795242 |
| H | 4.90674054433674  | 4.22784742764126  | -7.81198988653943 |
| H | 3.17405072560529  | 4.62339475839909  | -7.82836416419206 |
| H | 7.67746817704343  | 5.04180137896134  | -6.01425272190447 |
| H | 8.67175273646552  | 5.49432316455937  | -3.78861730302781 |
| H | 7.00682249328692  | 4.90094664447105  | -3.63090445630377 |
| H | 8.37533782386115  | 3.81824280324586  | -3.29309077104425 |
| H | 10.11434305378395 | 4.73056283596704  | -5.70715005196246 |
| H | 9.85787718071224  | 3.02964049801289  | -5.27095223729811 |
| H | 9.47122092147949  | 3.59343910988837  | -6.90593741964094 |
| H | 0.86871640370957  | -6.05373980349330 | -3.40828929131797 |
| H | 3.35163352987745  | -6.52796111814494 | -3.43360161304892 |
| H | -0.13268758039066 | -5.64543027959386 | -1.17084583237250 |
| H | 1.32244727604929  | -4.66178254451647 | -1.41630745120701 |
| H | -0.28732416812640 | -3.91826808356550 | -1.53925506831179 |
| H | -1.57193663182879 | -6.30024815746700 | -3.11893913765192 |
| H | -1.81443336768274 | -4.59153938944674 | -3.53170181632541 |
| H | -1.18700086235747 | -5.71673218090666 | -4.74833081421099 |
| H | 4.36370133625462  | -6.85360892858002 | -5.67006200996192 |
| H | 3.43829161859352  | -5.34059457045404 | -5.61057182869001 |
| H | 5.21350543219732  | -5.30427160451535 | -5.53584096088705 |
| H | 5.51248786534268  | -7.71945281841716 | -3.59677018468892 |
| H | 6.39123947215648  | -6.18958844260968 | -3.40524234708885 |
| H | 5.39986317435458  | -6.81450797908568 | -2.07603240184041 |
| H | 6.07512766830468  | 0.08890788842424  | -1.60733139386228 |
| H | 6.55593014190379  | -1.64783802750634 | 0.12807854218145  |
| H | 6.13568999193070  | -2.36979475928031 | -1.42758435700351 |
| H | 7.82786099547287  | -2.32456554513264 | -0.90106302144761 |
| H | 7.63115028317821  | 0.58656701274489  | 0.26741475933693  |
| H | 9.00140372221528  | 0.02436000162973  | -0.70340628417140 |
| H | 8.09224082510143  | 1.46216701128091  | -1.20006427231938 |

# Stage 5

**Table S51: *i*-C<sub>4</sub>H<sub>9</sub>-CCCC-AS-trans-cis transition state**

| Atom | x                 | y                 | z                 |
|------|-------------------|-------------------|-------------------|
| C    | 2.09928870517009  | -0.47687909534778 | 1.80015707997728  |
| Al   | 0.29467740164685  | -1.21037688124016 | 2.14871700145078  |
| Cl   | 0.06111317326765  | -0.76157186100910 | 4.43702026744665  |
| Nd   | -0.53761261639165 | 1.97537460847955  | 3.91265594014021  |
| C    | -0.51294421397718 | -2.95689765105845 | 1.71898363570799  |
| Cl   | -1.22525801898696 | 0.40536395513105  | 1.53252071786513  |
| Cl   | 0.82933882899105  | 3.38860282078921  | 1.82637972345658  |
| Al   | -0.96873218914494 | 4.74229755858170  | 1.32445514753065  |
| C    | -1.97704046494875 | 3.93657522714021  | -0.16953747719837 |
| Cl   | -2.23395764778358 | 4.08563418271971  | 3.21072708911467  |
| C    | -0.33343166797816 | 6.58402932404990  | 1.63649891484829  |
| H    | 2.03716348448241  | 0.61483293125931  | 1.91931813020951  |
| H    | 2.77802467029090  | -0.82681313833589 | 2.59039166873526  |
| H    | -1.33665891725322 | -3.13893676638096 | 2.42261363108020  |
| H    | -0.98216927838698 | -2.87700386615777 | 0.72832538689842  |
| H    | -0.18537742118042 | 6.71244911435278  | 2.71761992247145  |
| H    | 0.66574585658361  | 6.67849976247564  | 1.18834716862914  |
| H    | -1.84680432141877 | 2.84841373713207  | -0.09995375212173 |
| H    | -3.04802062312416 | 4.12276693717354  | -0.00765317579440 |
| C    | 3.62356832488423  | 2.89075437456833  | 4.84969032768599  |
| H    | 4.31462135657973  | 2.04187026082158  | 4.80184195444719  |
| H    | 3.89300216686294  | 3.48618448278932  | 5.72736188657264  |
| C    | -0.52127996186076 | 2.24274976502295  | 6.55035687066340  |
| C    | 0.09513450183771  | 3.40703322848453  | 6.08625957034952  |
| C    | 1.16774029086069  | 3.45935840636929  | 5.21051065534160  |
| C    | 2.18534465927352  | 2.35450483110234  | 5.03572282892739  |
| H    | 2.16193583369036  | 1.67261007498510  | 5.88995637044788  |
| H    | 1.99513437110677  | 1.70091984982788  | 4.15283221996572  |
| H    | 1.43324280099910  | 4.41881459329224  | 4.78769354072561  |
| H    | -0.46159264291120 | 4.33384455776576  | 6.20816696417839  |
| H    | -1.39145397482279 | 2.32297859725817  | 7.18647559268989  |
| H    | 0.05041837870814  | 1.32380570583820  | 6.67200401245485  |
| C    | -3.27467652147817 | 1.01709744884608  | 5.17749424403081  |
| C    | -3.53291082394320 | 0.49109015564693  | 3.97678550592121  |
| C    | -4.40050713918921 | 1.10904793886363  | 2.94509988665163  |
| C    | -5.66579064075112 | 0.76051990920755  | 2.74514706173678  |
| H    | -2.67981318010253 | 0.47889429525241  | 5.90439048884225  |
| H    | -3.69435216136781 | 1.96761334457388  | 5.48591267659230  |
| H    | -3.09743200353092 | -0.47330581122936 | 3.72847680136192  |
| H    | -3.94805870168360 | 1.87471100105832  | 2.32209987517563  |
| H    | -6.15065505391012 | -0.00355922524051 | 3.34266045151381  |
| H    | -6.26038235692479 | 1.23265458515932  | 1.97297840849197  |
| C    | 5.13764808595434  | 6.52157513063191  | 5.05707535280076  |

|   |                   |                   |                   |
|---|-------------------|-------------------|-------------------|
| H | 5.68227605231978  | 6.86444176161325  | 4.17368107663375  |
| H | 5.00047470616978  | 7.38124236220137  | 5.72119862746747  |
| C | 3.77844903859219  | 3.70437158768439  | 3.59300246474021  |
| C | 3.82324360812671  | 5.02960778535199  | 3.50579299817240  |
| C | 3.73927474925531  | 6.01673715270421  | 4.63618761572084  |
| H | 3.84319465744337  | 3.11401048053356  | 2.68125898414290  |
| H | 3.95917648317421  | 5.48150148768996  | 2.52551534564778  |
| H | 3.14729067979403  | 6.87660835174371  | 4.30653235095416  |
| H | 3.24376637366575  | 5.58439356010437  | 5.51059448899598  |
| C | 8.92066941648411  | 5.84233683522143  | 4.21224809720635  |
| H | 9.54110424963845  | 5.42981306057958  | 5.01324481611361  |
| H | 9.49548748288669  | 5.79125383000749  | 3.28238610707993  |
| C | 5.89624355559177  | 5.45646305872006  | 5.79649419209994  |
| C | 6.95355069013780  | 4.77936363462788  | 5.36103879551370  |
| H | 5.49701545397465  | 5.22815116811892  | 6.78246808394774  |
| H | 7.40219650386970  | 4.03472223194601  | 6.01448989204013  |
| C | 7.65938817229282  | 4.96115661558607  | 4.04757872189350  |
| H | 7.97303855972071  | 3.98143672912253  | 3.67383859075144  |
| H | 7.00204678250551  | 5.41157329335732  | 3.29847261039472  |
| C | 8.55353989790694  | 7.27533436817150  | 4.48213170569654  |
| C | 8.45710264069671  | 7.86464201093748  | 5.66905760069489  |
| H | 8.31554387208351  | 7.85311498286028  | 3.59198388136116  |
| H | 8.16755404917905  | 8.91247369335366  | 5.71174771888353  |
| C | 8.72118216948306  | 7.24337495426528  | 7.01200528267602  |
| C | 9.86935509288296  | 7.96974185141474  | 7.73197317981818  |
| H | 7.80865442540864  | 7.32104235641518  | 7.61311547586717  |
| H | 8.96365293996585  | 6.18105031890884  | 6.91610652465659  |
| H | 10.75355897403559 | 7.94891411158564  | 7.08576210871990  |
| H | 9.59785720237332  | 9.02000223706328  | 7.88538286707505  |
| C | 2.73804021088559  | -0.77506807943515 | 0.43644692089089  |
| C | 4.07716232365163  | -0.03821370100479 | 0.30959007108001  |
| C | 1.81260866085085  | -0.38494392526961 | -0.71763879948165 |
| C | 0.43113438785109  | -4.16854756291165 | 1.72146785042629  |
| C | -0.34356401929452 | -5.44370687467516 | 1.36707645282243  |
| C | 1.12822292363433  | -4.33455505610120 | 3.07340586279211  |
| C | -1.60892611383076 | 4.39651594941363  | -1.58628331302867 |
| C | -2.42104197468924 | 3.60763709504053  | -2.62103231754646 |
| C | -1.21991483106168 | 7.72044801406003  | 1.10771215410683  |
| C | -0.59707952071115 | 9.07873558771970  | 1.45319211152684  |
| C | -2.64092328503356 | 7.63472627601401  | 1.66874069148616  |
| C | -0.11188930563505 | 4.23669831936342  | -1.85946446127852 |
| H | -1.86593793618485 | 5.46303736707405  | -1.70082107746093 |
| H | -2.19153429655205 | 3.95328114982974  | -3.63029560339610 |
| H | -2.18947696995861 | 2.54300062275359  | -2.55294179833833 |
| H | -3.48848213732470 | 3.74314209912728  | -2.43973205110762 |
| H | 0.13172312423469  | 4.56481516621959  | -2.87114136105778 |

|   |                   |                   |                   |
|---|-------------------|-------------------|-------------------|
| H | 0.46587176093938  | 4.84339019840815  | -1.15077488910303 |
| H | 0.19094655079582  | 3.19225245309829  | -1.75054161219361 |
| H | -1.28147781106081 | 7.65096547654987  | 0.00895048372419  |
| H | -3.25293584087176 | 8.45428289001571  | 1.28884383323457  |
| H | -3.10697270997416 | 6.68828025456467  | 1.36903423323479  |
| H | -2.62953350885148 | 7.68670803765843  | 2.76029650134563  |
| H | -1.20686223388083 | 9.89072371571992  | 1.05369819094041  |
| H | -0.52007830671326 | 9.19708715926431  | 2.53566248185016  |
| H | 0.40373554567136  | 9.15017453230785  | 1.02420716454786  |
| H | 2.94158220555543  | -1.85680856720251 | 0.36145631185775  |
| H | 1.20784053249697  | -4.02514985217044 | 0.95180508588538  |
| H | 2.28526903813398  | -0.59750953933212 | -1.67779665169906 |
| H | 0.87729906117561  | -0.95518420873242 | -0.65939083865226 |
| H | 1.57329515456567  | 0.68092458442773  | -0.67671126000824 |
| H | 4.56351122486058  | -0.28840185099275 | -0.63467264231514 |
| H | 3.92066119016868  | 1.04152665896066  | 0.34796798349701  |
| H | 4.73922034176230  | -0.32205831532635 | 1.12930850875955  |
| H | 1.79077169648685  | -5.20139556176371 | 3.05942742779970  |
| H | 1.72895873480973  | -3.44486707034016 | 3.29843807878383  |
| H | 0.39506393256733  | -4.47033497246251 | 3.87242024813078  |
| H | 0.32980132880740  | -6.30180140415316 | 1.33489912334550  |
| H | -1.12120683384372 | -5.63490319949706 | 2.10889550846743  |
| H | -0.81580509123121 | -5.33402695466776 | 0.38945994368237  |
| C | 10.22675111039616 | 7.32430005009785  | 9.08160221753988  |
| C | 11.52933143183354 | 7.93041698583195  | 9.61765370442420  |
| C | 9.10462274954062  | 7.49708283375801  | 10.11139477800166 |
| H | 10.38868054425016 | 6.24832344834858  | 8.92108816036095  |
| H | 9.40278107603535  | 7.06090488660134  | 11.06585211021016 |
| H | 8.88507956609142  | 8.55477259902826  | 10.26789746144166 |
| H | 8.19297752208580  | 6.99854102543403  | 9.78088809482098  |
| H | 11.80284986463155 | 7.46181616996152  | 10.56397715093718 |
| H | 12.34220144619420 | 7.77380170195597  | 8.90726549271794  |
| H | 11.41416489694125 | 9.00312636088928  | 9.78260891701159  |



# Stage 5

**Table S52: *i*-C<sub>4</sub>H<sub>9</sub>-CCCC-AS-C-TS inclusion *cis*-C<sub>4</sub>H<sub>8</sub> in polymer. Transition state**

| Atom                                                                      | x                 | y                 | z                 |
|---------------------------------------------------------------------------|-------------------|-------------------|-------------------|
| 122                                                                       |                   |                   |                   |
| Coordinates from ORCA-job /home2/scratch/M_I_C_CCCC-ONIOM-XTB1-ext-TS-opt |                   |                   |                   |
| C                                                                         | 1.34016101609114  | -1.09530745444466 | 0.11737706003548  |
| Al                                                                        | -0.15933601756739 | -1.50871206255577 | 1.33240199857726  |
| Cl                                                                        | 0.70143222812029  | -1.35168237187151 | 3.52145526050741  |
| Nd                                                                        | -0.30311503071156 | 1.21342787385175  | 4.05254770901223  |
| C                                                                         | -1.42797303647540 | -3.02484855298221 | 1.35815666854542  |
| Cl                                                                        | -1.44124525569300 | 0.38492876784299  | 1.51598019873731  |
| Cl                                                                        | 1.54185094707226  | 2.43741823788489  | 2.29656710333083  |
| Al                                                                        | 0.15617733671793  | 4.25226427897407  | 1.83088182163939  |
| C                                                                         | -0.72508799929352 | 3.91492979085206  | 0.10129409854901  |
| Cl                                                                        | -1.46017283022192 | 3.68501454022428  | 3.45295216745607  |
| C                                                                         | 1.10985548136438  | 5.84554933323112  | 2.49798920971114  |
| H                                                                         | 1.51190454182385  | -0.01193363370964 | 0.16804923194799  |
| H                                                                         | 2.25894743186104  | -1.56437371217128 | 0.49500491359042  |
| H                                                                         | -1.82945721939690 | -3.10868925363085 | 2.37765740837711  |
| H                                                                         | -2.28353829300300 | -2.76119900259976 | 0.72019363917546  |
| H                                                                         | 1.07323334372634  | 5.82301431735942  | 3.59450559799893  |
| H                                                                         | 2.17101628834892  | 5.75131863536580  | 2.23148848726377  |
| H                                                                         | -0.81439761701777 | 2.82853176204807  | -0.02429505318454 |
| H                                                                         | -1.75431893844378 | 4.29683609683000  | 0.14791162943723  |
| C                                                                         | 3.40161009967333  | 1.76997412954673  | 5.99854628820754  |
| H                                                                         | 4.18780538777714  | 1.01104683917432  | 5.91399691978700  |
| H                                                                         | 3.51589891494540  | 2.25246391793672  | 6.97536384148582  |
| C                                                                         | -0.81609845574053 | 0.40478579597228  | 6.89548780498634  |
| C                                                                         | -0.29988016771746 | 1.70389862429911  | 6.80186619106829  |
| C                                                                         | 0.87484353886333  | 2.03966257156129  | 6.14973234197341  |
| C                                                                         | 2.02171780591771  | 1.06948946421450  | 5.95764504237110  |
| H                                                                         | 1.99284140683081  | 0.30144590482792  | 6.73643787963218  |
| H                                                                         | 1.98050284111402  | 0.49938239423785  | 5.00752158914748  |
| H                                                                         | 1.10564673386652  | 3.08775263643911  | 6.00920146541150  |
| H                                                                         | -0.97355790730179 | 2.52489779643632  | 7.04098144415308  |
| H                                                                         | -1.75724135614457 | 0.24495156893330  | 7.39815514934877  |
| H                                                                         | -0.13772280522901 | -0.44762754734836 | 6.90524106020664  |
| C                                                                         | -2.64651724093471 | 0.60310291811198  | 5.82444289773770  |
| C                                                                         | -3.12176698970390 | 0.57132690317058  | 4.57150199216978  |
| C                                                                         | -3.82183651551216 | 1.64286293067093  | 3.85607648197045  |
| C                                                                         | -4.32441515670124 | 2.75579921812744  | 4.39244158570976  |
| H                                                                         | -2.54891869605411 | -0.25873137435995 | 6.31289037497954  |
| H                                                                         | -3.27465081760589 | 1.14712466824818  | 6.48985530047111  |
| H                                                                         | -2.98500701278429 | -0.34094491421487 | 4.00074625970454  |
| H                                                                         | -3.93797301309294 | 1.48250700554725  | 2.78941568640273  |
| H                                                                         | -4.27157973806090 | 2.96526832107313  | 5.45445316872622  |

|   |                   |                   |                   |
|---|-------------------|-------------------|-------------------|
| H | -4.83111020050861 | 3.48942553978572  | 3.77927305638047  |
| C | 4.45483665005172  | 5.88057718026112  | 6.48221145720680  |
| H | 4.64432308133317  | 6.47553191477290  | 5.58465486494083  |
| H | 4.15292030532427  | 6.56694739319967  | 7.27998917545403  |
| C | 3.57903105333617  | 2.76778660900987  | 4.88730905591855  |
| C | 3.51357402623886  | 4.09113574688611  | 4.98226443237066  |
| C | 3.27857220883652  | 4.91675180609743  | 6.21410286882587  |
| H | 3.75391043603809  | 2.32203012709587  | 3.90971664161751  |
| H | 3.65913125280342  | 4.68132862906550  | 4.07848863392526  |
| H | 2.37842680326987  | 5.52302625821209  | 6.06399525045596  |
| H | 3.11430278975702  | 4.28979858148075  | 7.09537490154185  |
| C | 7.84907874069695  | 6.57177745705887  | 4.65689057964761  |
| H | 8.73181631189193  | 6.46845397384416  | 5.29407049284907  |
| H | 8.19282541923233  | 6.67129371549721  | 3.62220397972388  |
| C | 5.68866332935008  | 5.14253954696602  | 6.92041828002200  |
| C | 6.76362943657049  | 4.88252921085582  | 6.18426371910260  |
| H | 5.65566520130018  | 4.78464859537152  | 7.94702183429057  |
| H | 7.59121420984591  | 4.34446428224137  | 6.64071977519117  |
| C | 6.99570065801835  | 5.28498152934006  | 4.75486561981455  |
| H | 7.53334915205540  | 4.47961681545723  | 4.24470205189489  |
| H | 6.05051099101787  | 5.44238361678027  | 4.22743691889949  |
| C | 7.04410244203954  | 7.78860072732142  | 5.01740767540331  |
| C | 7.06978099790835  | 8.45681110543601  | 6.16557912246494  |
| H | 6.35816968328836  | 8.11577767092744  | 4.23948773043529  |
| H | 6.42254022105864  | 9.32333490731684  | 6.28131285385957  |
| C | 7.94742744559372  | 8.17712011880600  | 7.35348159073338  |
| C | 9.04258751204144  | 9.25290606828218  | 7.46483776544452  |
| H | 7.32959372693212  | 8.18814957106512  | 8.25731786680085  |
| H | 8.41193458411384  | 7.18932727327934  | 7.28013238764517  |
| H | 9.60559896515535  | 9.27152451153792  | 6.52540681090490  |
| H | 8.57552672011007  | 10.23632101307275 | 7.58781099722510  |
| C | 1.14793784685730  | -1.49883074158670 | -1.35058502671388 |
| C | 2.33377184364976  | -1.00505935176912 | -2.18807773525434 |
| C | -0.16133809869362 | -0.95090808435133 | -1.92250495006322 |
| C | -0.88840016791469 | -4.39217907074208 | 0.91639910072843  |
| C | -1.98799280532699 | -5.45529952833437 | 1.02986486530717  |
| C | 0.33300188871611  | -4.80892348372058 | 1.73872449983442  |
| C | -0.02769343419141 | 4.50072833392275  | -1.13328842899475 |
| C | -0.81227292527735 | 4.14215823525343  | -2.40083977986252 |
| C | 0.59479177413852  | 7.20728652652318  | 2.01258701599302  |
| C | 1.43410330052687  | 8.33566828819943  | 2.62451347786616  |
| C | -0.88237412349856 | 7.40200997737824  | 2.36079154836226  |
| C | 1.41540157682427  | 4.00285788314884  | -1.24404537749735 |
| H | -0.00326328082455 | 5.60102091692811  | -1.05509329641377 |
| H | -0.33798691036581 | 4.58056626806446  | -3.28039500029575 |
| H | -0.85314033227939 | 3.05862241788507  | -2.52714243195243 |

|   |                   |                   |                   |
|---|-------------------|-------------------|-------------------|
| H | -1.83269270491514 | 4.52168215001226  | -2.32812202251249 |
| H | 1.89831140416643  | 4.41500268088085  | -2.13140920352875 |
| H | 1.98804909462555  | 4.31689861329268  | -0.36229567055700 |
| H | 1.44696096387990  | 2.91156322641132  | -1.30505950942959 |
| H | 0.69949114219179  | 7.26908959667145  | 0.91674786402628  |
| H | -1.23356193423004 | 8.37452746048130  | 2.01248338777704  |
| H | -1.48787052021766 | 6.62335368916762  | 1.88116869870626  |
| H | -1.03469952319731 | 7.34407360429957  | 3.44145875393383  |
| H | 1.08534667061023  | 9.30688789114885  | 2.26976043308899  |
| H | 1.36363463221796  | 8.31313732746900  | 3.71374256483507  |
| H | 2.48107690387822  | 8.21636785952314  | 2.34226856925398  |
| H | 1.11798109045281  | -2.59894694162219 | -1.42397471957150 |
| H | -0.58471864790882 | -4.33763062166433 | -0.14215019065744 |
| H | -0.27433742936257 | -1.24175354847674 | -2.96801341029146 |
| H | -1.01453717771490 | -1.34933045449216 | -1.35977046747526 |
| H | -0.18519377200629 | 0.13990235205966  | -1.86143339911569 |
| H | 2.22187255612242  | -1.31540091144975 | -3.22822099680974 |
| H | 2.39384953258720  | 0.08477230020244  | -2.15091112647605 |
| H | 3.26533612656150  | -1.41788122699908 | -1.79790199570565 |
| H | 0.70000829365469  | -5.78351602187669 | 1.41318361731412  |
| H | 1.13939884206165  | -4.07627899247633 | 1.61118639947712  |
| H | 0.08221642751748  | -4.86908341192188 | 2.80066652872923  |
| H | -1.61929055794403 | -6.42259000312824 | 0.68467999357422  |
| H | -2.31565996391177 | -5.55371317553148 | 2.06641717575372  |
| H | -2.84645855472589 | -5.17070391842940 | 0.41939350494209  |
| C | 10.02021174291628 | 8.99526208919967  | 8.62370449357123  |
| C | 11.22915326063884 | 9.93049362932719  | 8.49909916534834  |
| C | 9.34764610728819  | 9.18506044508133  | 9.98786978273177  |
| H | 10.37913893933667 | 7.95800818202634  | 8.55379312475574  |
| H | 10.07247477421133 | 9.02574056253053  | 10.78745406760938 |
| H | 8.94609109330948  | 10.19567837283078 | 10.08148950271904 |
| H | 8.53234850345959  | 8.47352018207188  | 10.12125891379443 |
| H | 11.93727700654151 | 9.74276075355777  | 9.30734862471547  |
| H | 11.73928275568703 | 9.76842901519748  | 7.54862394924162  |
| H | 10.91380892846907 | 10.97415752639669 | 8.55010121783865  |

**Stage 5****Table S53: *i*-C<sub>4</sub>H<sub>9</sub>-CCCC-AS-T-TS inclusion *trans*-C<sub>4</sub>H<sub>8</sub> in polymer. Transition state**

| Atom | x            | y            | z            |
|------|--------------|--------------|--------------|
| C    | 1.459591000  | -1.009396000 | 0.442849000  |
| Al   | 0.025182000  | -1.597607000 | 1.663364000  |
| Cl   | 0.691799000  | -0.845801000 | 3.786637000  |
| Nd   | -1.044516000 | 1.395597000  | 3.865817000  |
| C    | -0.798496000 | -3.376858000 | 1.901266000  |
| Cl   | -1.749377000 | -0.129651000 | 1.527609000  |
| Cl   | 0.770440000  | 2.500301000  | 1.873940000  |
| Al   | -0.483040000 | 4.375362000  | 1.433023000  |
| C    | -1.555212000 | 4.025188000  | -0.188067000 |
| Cl   | -1.965369000 | 4.014477000  | 3.213026000  |
| C    | 0.662288000  | 5.922892000  | 1.877678000  |
| H    | 1.416686000  | 0.085430000  | 0.384276000  |
| H    | 2.428902000  | -1.246587000 | 0.903668000  |
| H    | -1.247338000 | -3.418054000 | 2.903378000  |
| H    | -1.638334000 | -3.459926000 | 1.196861000  |
| H    | 0.734578000  | 6.002636000  | 2.970338000  |
| H    | 1.678958000  | 5.698106000  | 1.526874000  |
| H    | -1.787460000 | 2.951421000  | -0.203535000 |
| H    | -2.521797000 | 4.539944000  | -0.097067000 |
| C    | 3.537249000  | 3.068816000  | 5.232334000  |
| H    | 4.425114000  | 2.429581000  | 5.163182000  |
| H    | 3.548843000  | 3.530150000  | 6.225370000  |
| C    | -0.345308000 | 1.272018000  | 6.592450000  |
| C    | -0.031158000 | 2.605045000  | 6.084639000  |
| C    | 1.022831000  | 2.966596000  | 5.312813000  |
| C    | 2.280983000  | 2.177197000  | 5.073488000  |
| H    | 2.337932000  | 1.337655000  | 5.768449000  |
| H    | 2.294792000  | 1.747219000  | 4.069076000  |
| H    | 1.026345000  | 3.978949000  | 4.921875000  |
| H    | -0.776578000 | 3.375284000  | 6.284675000  |
| H    | -0.641023000 | 1.286760000  | 7.633432000  |
| H    | 0.424757000  | 0.519896000  | 6.428718000  |
| C    | -2.173518000 | 0.312285000  | 6.333109000  |
| C    | -2.828140000 | 0.113472000  | 5.093288000  |
| C    | -3.759328000 | 1.100366000  | 4.592316000  |
| C    | -4.366793000 | 1.120039000  | 3.389926000  |
| H    | -1.766005000 | -0.562986000 | 6.820658000  |
| H    | -2.652480000 | 1.005328000  | 7.014391000  |
| H    | -2.747869000 | -0.845316000 | 4.588539000  |
| H    | -3.920801000 | 1.960168000  | 5.244764000  |
| H    | -4.269447000 | 0.303352000  | 2.687379000  |
| H    | -5.002096000 | 1.946950000  | 3.105351000  |
| C    | 4.552190000  | 6.856348000  | 6.091572000  |

|   |              |              |              |
|---|--------------|--------------|--------------|
| H | 4.982607000  | 7.459180000  | 5.287237000  |
| H | 4.285095000  | 7.532280000  | 6.910346000  |
| C | 3.626581000  | 4.115730000  | 4.155536000  |
| C | 3.501300000  | 5.430269000  | 4.305549000  |
| C | 3.257658000  | 6.181066000  | 5.583971000  |
| H | 3.809298000  | 3.716596000  | 3.158445000  |
| H | 3.615538000  | 6.066781000  | 3.430530000  |
| H | 2.516440000  | 6.964821000  | 5.396527000  |
| H | 2.862815000  | 5.526627000  | 6.366480000  |
| C | 8.315645000  | 6.846468000  | 4.794762000  |
| H | 9.070880000  | 6.407223000  | 5.452696000  |
| H | 8.771356000  | 6.987594000  | 3.809432000  |
| C | 5.534766000  | 5.840581000  | 6.602399000  |
| C | 6.625410000  | 5.405367000  | 5.980661000  |
| H | 5.282942000  | 5.422128000  | 7.574320000  |
| H | 7.250212000  | 4.665475000  | 6.475886000  |
| C | 7.138844000  | 5.854675000  | 4.641929000  |
| H | 7.499442000  | 4.980274000  | 4.090708000  |
| H | 6.348940000  | 6.322430000  | 4.047599000  |
| C | 7.843873000  | 8.179054000  | 5.306103000  |
| C | 7.928592000  | 8.632599000  | 6.551919000  |
| H | 7.361972000  | 8.800917000  | 4.554941000  |
| H | 7.540841000  | 9.623783000  | 6.776561000  |
| C | 8.547954000  | 7.929689000  | 7.727726000  |
| C | 9.865844000  | 8.614559000  | 8.130537000  |
| H | 7.844342000  | 7.968344000  | 8.565965000  |
| H | 8.739106000  | 6.876121000  | 7.503453000  |
| H | 10.530230000 | 8.626210000  | 7.259733000  |
| H | 9.666864000  | 9.655922000  | 8.406656000  |
| C | 1.437938000  | -1.592147000 | -0.977221000 |
| C | 2.575002000  | -0.989309000 | -1.811205000 |
| C | 0.093809000  | -1.347710000 | -1.666425000 |
| C | 0.122888000  | -4.591292000 | 1.710183000  |
| C | -0.661181000 | -5.891649000 | 1.924984000  |
| C | 1.324649000  | -4.539377000 | 2.655928000  |
| C | -0.913499000 | 4.421044000  | -1.526848000 |
| C | -1.817798000 | 4.002854000  | -2.692653000 |
| C | 0.236095000  | 7.281612000  | 1.302752000  |
| C | 1.243514000  | 8.367316000  | 1.701101000  |
| C | -1.168771000 | 7.669536000  | 1.768589000  |
| C | 0.476340000  | 3.802649000  | -1.693692000 |
| H | -0.804299000 | 5.518049000  | -1.565047000 |
| H | -1.385998000 | 4.319625000  | -3.643585000 |
| H | -1.940760000 | 2.918150000  | -2.706802000 |
| H | -2.801597000 | 4.462672000  | -2.585755000 |
| H | 0.907705000  | 4.080940000  | -2.656585000 |

|   |              |              |              |
|---|--------------|--------------|--------------|
| H | 1.145101000  | 4.159355000  | -0.900628000 |
| H | 0.423721000  | 2.712173000  | -1.638840000 |
| H | 0.226935000  | 7.223631000  | 0.201278000  |
| H | -1.459438000 | 8.634628000  | 1.350492000  |
| H | -1.895100000 | 6.916963000  | 1.438283000  |
| H | -1.209412000 | 7.736434000  | 2.858617000  |
| H | 0.956866000  | 9.330335000  | 1.275089000  |
| H | 1.288612000  | 8.463873000  | 2.787577000  |
| H | 2.237834000  | 8.106538000  | 1.334747000  |
| H | 1.601658000  | -2.681979000 | -0.925821000 |
| H | 0.503659000  | -4.598259000 | 0.675185000  |
| H | 0.099566000  | -1.759159000 | -2.677024000 |
| H | -0.712045000 | -1.832132000 | -1.101125000 |
| H | -0.119970000 | -0.277534000 | -1.728689000 |
| H | 2.588477000  | -1.425079000 | -2.811659000 |
| H | 2.447629000  | 0.091403000  | -1.900475000 |
| H | 3.535066000  | -1.186846000 | -1.331534000 |
| H | 1.964934000  | -5.410941000 | 2.510775000  |
| H | 1.918748000  | -3.638539000 | 2.460134000  |
| H | 0.996067000  | -4.519450000 | 3.698063000  |
| H | -0.017894000 | -6.757594000 | 1.760032000  |
| H | -1.053840000 | -5.934778000 | 2.942682000  |
| H | -1.499004000 | -5.941624000 | 1.227575000  |
| C | 10.580572000 | 7.898448000  | 9.288961000  |
| C | 12.000615000 | 8.455534000  | 9.446523000  |
| C | 9.811632000  | 8.040984000  | 10.607089000 |
| H | 10.656631000 | 6.828938000  | 9.044044000  |
| H | 10.357361000 | 7.549335000  | 11.413701000 |
| H | 9.684951000  | 9.093602000  | 10.866662000 |
| H | 8.826069000  | 7.580427000  | 10.533977000 |
| H | 12.521577000 | 7.939380000  | 10.254131000 |
| H | 12.568064000 | 8.316229000  | 8.525362000  |
| H | 11.971719000 | 9.521622000  | 9.678511000  |

# Stage 5

**Table S54: *i*-C<sub>4</sub>H<sub>9</sub>-TTTT-AS-T-TS inclusion *trans*-C<sub>4</sub>H<sub>8</sub> in polymer. Transition state**

| Atom | x                 | y                 | z                 |
|------|-------------------|-------------------|-------------------|
| C    | 1.38164654485927  | -4.28292698935788 | -4.92067797350232 |
| Al   | 2.29179504988171  | -3.11231081926615 | -3.61465194307442 |
| Cl   | 3.42328347209957  | -1.47498880068565 | -4.80757195512816 |
| Nd   | 2.20391216120032  | 0.76679761310652  | -3.55815182449320 |
| C    | 3.40474948564943  | -3.61786127586654 | -2.05995398910431 |
| Cl   | 0.71377095416587  | -1.59010753538904 | -2.80824520957991 |
| Cl   | 2.81257062375741  | 2.35267539680846  | -5.87204682114042 |
| Al   | 4.85531933758985  | 3.17433915712539  | -5.10883139241497 |
| C    | 4.44266224084190  | 4.82278507464257  | -4.09437867628777 |
| Cl   | 5.01412216182911  | 1.56591314531878  | -3.47592095480337 |
| C    | 6.14700075161404  | 2.85641096964029  | -6.56373430725772 |
| H    | 0.52552313455377  | -3.74117718967938 | -5.34047266083490 |
| H    | 2.06031848874820  | -4.46418554245000 | -5.76590991716997 |
| H    | 4.19038548085788  | -2.86225926634515 | -1.93623885235203 |
| H    | 2.77872779851451  | -3.55095973954793 | -1.15905898659845 |
| H    | 6.32354699112105  | 1.77535660083872  | -6.63219778863829 |
| H    | 5.67337685829472  | 3.14106818044747  | -7.51358004800497 |
| H    | 3.44112204519166  | 4.70427220542837  | -3.65521853030364 |
| H    | 5.13258730063766  | 4.88234878031182  | -3.24048434029886 |
| C    | -0.09003170044837 | -1.18772658452080 | -6.73104917857372 |
| H    | -0.69240112876877 | -2.00842799465830 | -7.14184552292265 |
| H    | 0.71051637342447  | -1.64486623610814 | -6.14152983866552 |
| C    | -0.98584452000069 | -0.32054966654838 | -5.82916292263108 |
| C    | -0.29725859874712 | 0.88625004587059  | -5.26416828353114 |
| C    | -0.50044350786705 | 1.37692447601264  | -4.02127271441508 |
| C    | 0.10991559087510  | 2.56372257609190  | -3.43045570509738 |
| H    | -0.61256996354786 | 3.15855806007592  | -2.88775974984974 |
| H    | 0.65894825366068  | 3.19634316927684  | -4.13021149472704 |
| H    | -1.15270112228547 | 0.80673262987610  | -3.36160136649111 |
| H    | 0.28802397689532  | 1.46925324524347  | -5.97032386091807 |
| H    | -1.84193052915654 | 0.03038363220292  | -6.41964510834737 |
| H    | -1.39403873171602 | -0.92814252372028 | -5.01790925034265 |
| C    | 1.06937151532426  | 2.56141438088943  | -1.56763236235771 |
| C    | 2.31705814940957  | 1.94407810387661  | -1.32758050302868 |
| C    | 2.43348712040523  | 0.61609414224407  | -0.77372907045267 |
| C    | 3.55442854010722  | -0.13369701188515 | -0.71790742408521 |
| H    | 1.06208246709850  | 3.64184512017518  | -1.60220062254668 |
| H    | 0.20392783244740  | 2.13444930594039  | -1.07180427254543 |
| H    | 3.22204486251062  | 2.52977694386156  | -1.45290483741841 |
| H    | 1.50236878228186  | 0.14743787052089  | -0.45849415015522 |
| H    | 4.52012976732769  | 0.26090356453829  | -1.00619333439527 |
| H    | 3.52701898791272  | -1.14174774019150 | -0.33083857941539 |
| C    | 3.91133104738650  | 0.37959627824700  | -9.12050340398403 |

|   |                   |                   |                    |
|---|-------------------|-------------------|--------------------|
| H | 4.29839215723785  | 1.07332734458964  | -9.87432049302118  |
| H | 4.00000274733167  | 0.85639643833361  | -8.13729933356020  |
| C | 2.42342093315279  | 0.11097450768391  | -9.42051022754316  |
| C | 1.76763022003277  | -0.63054385136282 | -8.29019063157877  |
| C | 0.52812607482492  | -0.41646628595567 | -7.86964851481328  |
| H | 2.35007149591561  | -0.48417693397978 | -10.33912058642432 |
| H | 1.90757957575489  | 1.05998324279059  | -9.59974667667994  |
| H | 2.38270436896244  | -1.38998518403789 | -7.80999097287034  |
| H | -0.11030118745635 | 0.32209457484111  | -8.34959344501198  |
| C | 4.70592850067860  | -0.89486386839858 | -9.15874117365717  |
| C | 5.19410240358056  | -1.50409661545890 | -8.08579916319574  |
| C | 5.95470113288604  | -2.79874288230654 | -8.13767023357200  |
| C | 7.32930225919666  | -2.67751947913079 | -7.44571614378817  |
| H | 7.84656692929419  | -1.79003484729819 | -7.82507061088881  |
| H | 7.92553718114620  | -3.55801108973886 | -7.70717106391089  |
| H | 5.06743044846753  | -1.07154996401077 | -7.09492717659326  |
| H | 4.82979849039731  | -1.33344375390893 | -10.14691669961739 |
| H | 6.10169730596530  | -3.10686631642303 | -9.17798576673336  |
| H | 5.37374028046691  | -3.58239941549753 | -7.63488580359401  |
| C | 0.88922398825047  | -5.63530355224136 | -4.38305450678716  |
| C | 0.19979475023104  | -6.43112841961640 | -5.49784217487019  |
| C | 7.17858060810609  | -2.60476571226989 | -5.95294659990356  |
| C | 7.33991139360146  | -1.49828445146456 | -5.23943816906083  |
| C | 7.12765993550399  | -1.42019996947311 | -3.75462370694831  |
| C | 8.26088823185567  | -0.65993307648756 | -3.05340780027150  |
| C | 7.90849505946234  | -0.26803340455137 | -1.60956391099394  |
| C | 7.77804292501013  | -1.49481221241763 | -0.70118442101791  |
| C | 4.05246959037908  | -5.00940723345882 | -2.10294287664752  |
| C | 4.83870154326874  | -5.27203996362306 | -0.81287015130062  |
| C | 4.49544554246706  | 6.15530052513489  | -4.85718430767001  |
| C | 4.11331752088705  | 7.31478572897272  | -3.92873197089428  |
| C | 7.49691446725528  | 3.58095413899815  | -6.45707755397431  |
| C | 8.40296875864242  | 3.18143492637371  | -7.62788519898021  |
| C | -0.06608932212420 | -5.45170660116557 | -3.20165656486039  |
| C | 4.96978228149207  | -5.16094948977153 | -3.31717232280466  |
| C | 8.19469595670554  | 3.28440786890461  | -5.12819564440794  |
| C | 3.57912268550072  | 6.13900507980084  | -6.08264447535621  |
| C | 8.96662008960981  | 0.69287590011346  | -1.05602116605014  |
| H | 6.88442798260466  | -3.53520261141987 | -5.47059326668564  |
| H | 7.62888679797583  | -0.56609687591240 | -5.72235704761804  |
| H | 6.18353028628229  | -0.89128295405821 | -3.56859088836954  |
| H | 7.03056331332011  | -2.42827465292331 | -3.33754775048558  |
| H | 9.17304533481609  | -1.26672933970387 | -3.06388112013624  |
| H | 8.46980537035657  | 0.25614121577338  | -3.61831344922147  |
| H | 5.52701754653463  | 6.33177112594799  | -5.20522910393120  |
| H | 4.17887233687515  | 8.26707560605011  | -4.45768722729224  |



|   |                   |                   |                   |
|---|-------------------|-------------------|-------------------|
| H | 3.09310776820427  | 7.18682061241075  | -3.56164280323041 |
| H | 4.78865237748673  | 7.34442828497950  | -3.07212036566595 |
| H | 3.62664351838312  | 7.09297753064127  | -6.61023928520570 |
| H | 3.88928252127984  | 5.34646367504586  | -6.77407748824083 |
| H | 2.54246700175504  | 5.95665372947209  | -5.78799255041905 |
| H | 7.32923476384832  | 4.66932697031682  | -6.51800124405407 |
| H | 9.14482492781830  | 3.81731087203203  | -5.06514710513995 |
| H | 7.56258613841521  | 3.60425491806933  | -4.29056611600708 |
| H | 8.39085936728324  | 2.21451421901464  | -5.02595162788542 |
| H | 9.35267557265226  | 3.71666057630760  | -7.57731555868653 |
| H | 8.60287672473044  | 2.10842208833340  | -7.60322858279646 |
| H | 7.91670921400914  | 3.42170483777254  | -8.57485232326207 |
| H | 1.75196870023066  | -6.22764443759796 | -4.03611680251243 |
| H | 3.26310605869917  | -5.77652791231736 | -2.17278893458406 |
| H | -0.40231585275962 | -6.41922680872128 | -2.82533587739262 |
| H | 0.44053837937869  | -4.92148218831778 | -2.38586251773747 |
| H | -0.94288098785446 | -4.87174025743352 | -3.50051157849001 |
| H | -0.12871416777739 | -7.40338401148380 | -5.12656992406278 |
| H | -0.66941372497058 | -5.88630638631447 | -5.87138292065613 |
| H | 0.89209290098507  | -6.58960907360030 | -6.32633620378201 |
| H | 5.38582138640816  | -6.16868795473363 | -3.36267559963352 |
| H | 4.40882484750778  | -4.97531927388813 | -4.24109588488028 |
| H | 5.79523585099875  | -4.44781720233217 | -3.26509876226559 |
| H | 5.28182445474402  | -6.26920058692335 | -0.83107244354800 |
| H | 5.63673366400954  | -4.53611159869925 | -0.69807399857907 |
| H | 4.17503901044118  | -5.20062635113702 | 0.05039573542269  |
| H | 6.94227921382906  | 0.25869442292814  | -1.62159521218500 |
| H | 7.55825091350156  | -1.18376264216270 | 0.32123376472623  |
| H | 6.96820824051021  | -2.14163507600483 | -1.04043070344308 |
| H | 8.70445252734577  | -2.07205138013412 | -0.69604341773119 |
| H | 8.71164363920322  | 0.99131722225047  | -0.03811760792310 |
| H | 9.94895705002748  | 0.21727458513628  | -1.04197239468465 |
| H | 9.02406883403162  | 1.59013831245692  | -1.67458608698414 |

# Stage 5

**Table S55: *i*-C<sub>4</sub>H<sub>9</sub>-CCCC-AS addition *cis*-C<sub>4</sub>H<sub>8</sub> chain in polymer.**

| Atom | x                 | y                 | z                 |
|------|-------------------|-------------------|-------------------|
| C    | 1.02912730529365  | -0.64864639897397 | 0.21424488940962  |
| Al   | -0.26123143658297 | -1.25528591483335 | 1.57746058617082  |
| Cl   | 0.72424361051850  | -0.68457710951967 | 3.64336331451008  |
| Nd   | -0.80375432230721 | 1.64368220551572  | 3.96993822358731  |
| C    | -1.13288020075654 | -3.01169754767504 | 1.79953885377197  |
| Cl   | -1.96924404140385 | 0.31041721188120  | 1.78759552686972  |
| Cl   | 0.99457581474175  | 2.69952961373682  | 1.96921986268859  |
| Al   | -0.33454423083472 | 4.51378717248765  | 1.45221992933608  |
| C    | -1.35670511495377 | 4.10554677481240  | -0.18525907200638 |
| Cl   | -1.87701575273835 | 4.12155589328337  | 3.19477141458335  |
| C    | 0.73739077896077  | 6.09230026877282  | 1.96185626089188  |
| H    | 1.00306062174040  | 0.44709070837960  | 0.18252348513260  |
| H    | 2.03972156521058  | -0.91301998589280 | 0.55613752795046  |
| H    | -1.40818920074202 | -3.13875289580953 | 2.85520782866614  |
| H    | -2.08133002777649 | -2.99593969540452 | 1.24444175770724  |
| H    | 0.79648323532399  | 6.12641381182469  | 3.05840163156667  |
| H    | 1.76663545563734  | 5.92894116227313  | 1.61317209598527  |
| H    | -1.48020638705405 | 3.01539913795091  | -0.23639126038943 |
| H    | -2.36990873540555 | 4.51629459345791  | -0.07561947942224 |
| C    | 4.04129842357504  | 2.75655405158173  | 5.63310991917423  |
| H    | 4.73968012315785  | 1.96686034446655  | 5.93109865221020  |
| H    | 4.15652364639745  | 3.57864296894169  | 6.34698351028272  |
| C    | 0.00700715164676  | 3.16185807583875  | 7.37817853081585  |
| C    | 0.51928869967512  | 3.65913334683372  | 6.05880788177856  |
| C    | 1.58351289814692  | 3.24573024595370  | 5.35571548754920  |
| C    | 2.59761894586671  | 2.19929962895207  | 5.71054784348857  |
| H    | 2.41311468877555  | 1.78901185813914  | 6.70380763361663  |
| H    | 2.51171994696895  | 1.36274981395030  | 5.00637147885176  |
| H    | 1.77729262339935  | 3.75070717878572  | 4.41448527979552  |
| H    | -0.07023701754842 | 4.46494356709677  | 5.62453793653831  |
| H    | -0.14525196800449 | 4.02149173737892  | 8.03819917054510  |
| H    | 0.72957648253508  | 2.50648260905152  | 7.86789253639288  |
| C    | -1.32714324438123 | 2.41372524649846  | 7.20277907621554  |
| C    | -1.15017061665666 | 1.05221232018562  | 6.55141401917376  |
| C    | -2.17611045461270 | 0.37830301444033  | 5.88100793884199  |
| C    | -3.17135902860517 | 0.95477462259115  | 5.10814972746796  |
| H    | -1.80166814653832 | 2.28702133259825  | 8.18417447410386  |
| H    | -2.01671579450117 | 3.05133915903354  | 6.63622075125144  |
| H    | -0.39329550058508 | 0.42941367158851  | 7.02064805217405  |
| H    | -2.02257201778441 | -0.69160661281722 | 5.73748224504148  |
| H    | -3.50837348438082 | 1.97346431973853  | 5.28194873053215  |
| H    | -3.84489444027799 | 0.33155869289384  | 4.53728591251110  |
| C    | 5.25860298006244  | 6.46285173939535  | 5.06938626839176  |

|   |                   |                   |                   |
|---|-------------------|-------------------|-------------------|
| H | 5.91943511721126  | 6.65273620536739  | 4.21951126751360  |
| H | 4.93182246008626  | 7.43139535495082  | 5.46214443601263  |
| C | 4.40028007341300  | 3.21724778605143  | 4.24381375799729  |
| C | 4.37660571289848  | 4.46935181741515  | 3.79902029912128  |
| C | 4.00726156756092  | 5.69747687959172  | 4.58427045045456  |
| H | 4.68050676838087  | 2.41893312080148  | 3.55944286142328  |
| H | 4.67632699047442  | 4.66589939143237  | 2.77173696886065  |
| H | 3.42907289404490  | 6.36704628770592  | 3.93888707594346  |
| H | 3.38545189432586  | 5.44679984708237  | 5.44884470543608  |
| C | 9.18417729575529  | 6.00566255530664  | 4.96041375977924  |
| H | 9.71070057189682  | 5.84669785310671  | 5.90596171159756  |
| H | 9.88572800877268  | 5.79660719410309  | 4.14675177389614  |
| C | 5.96599588396156  | 5.71229487969155  | 6.16159657727549  |
| C | 7.12734158965696  | 5.07331499722779  | 6.06773636758750  |
| H | 5.43236109461297  | 5.69457719779182  | 7.10947770797992  |
| H | 7.52171480296624  | 4.57228538105562  | 6.94881693301724  |
| C | 8.01561554347881  | 4.99694397936406  | 4.85856729339011  |
| H | 8.43927353373256  | 3.98989727954944  | 4.79154017193039  |
| H | 7.45614156570043  | 5.18749295480328  | 3.93840125971503  |
| C | 8.69727539023879  | 7.42255943082838  | 4.83267831138179  |
| C | 8.42373755843430  | 8.26384056861352  | 5.82399664035691  |
| H | 8.53234336815130  | 7.75022140734358  | 3.80878097286200  |
| H | 8.07056515393556  | 9.26376400319618  | 5.58140754264501  |
| C | 8.56956251552706  | 8.00085920784319  | 7.29689730543202  |
| C | 9.66041678418142  | 8.90002153194962  | 7.90318175050376  |
| H | 7.61124296890516  | 8.21278706872677  | 7.78312755829136  |
| H | 8.81308924056928  | 6.95188034081292  | 7.48895134663662  |
| H | 10.58928942476651 | 8.74486961566766  | 7.34371590615568  |
| H | 9.37537956311780  | 9.95109546091728  | 7.78386658177607  |
| C | 0.82872558110541  | -1.20107798825692 | -1.20245623554531 |
| C | 1.89510275765143  | -0.63104527468942 | -2.14560461595273 |
| C | -0.57012139514361 | -0.88454422789340 | -1.73528329470125 |
| C | -0.31455755529084 | -4.22723820726025 | 1.33971811605004  |
| C | -1.11784647895002 | -5.51704825686192 | 1.54726319512775  |
| C | 1.02301946354718  | -4.31561074000524 | 2.07735440429215  |
| C | -0.76167974395162 | 4.61060330653063  | -1.50615337540324 |
| C | -1.63717886836636 | 4.16508701367355  | -2.68378969370627 |
| C | 0.25589238844077  | 7.45549089802374  | 1.44576518623044  |
| C | 1.18144211398707  | 8.56842794805659  | 1.95291610839367  |
| C | -1.18780761471160 | 7.73840731919159  | 1.86624594448261  |
| C | 0.67371033919832  | 4.11860133717540  | -1.70191715335987 |
| H | -0.74658477237943 | 5.71364523028805  | -1.49880931321946 |
| H | -1.23953828217311 | 4.55299148512186  | -3.62307633558136 |
| H | -1.67088702469119 | 3.07538030807076  | -2.74024410814492 |
| H | -2.65457376140995 | 4.53770349493153  | -2.55471167287885 |
| H | 1.07744259735145  | 4.47645823247902  | -2.65024835019851 |

|   |                   |                   |                   |
|---|-------------------|-------------------|-------------------|
| H | 1.31286105975576  | 4.49095988497933  | -0.89163238573716 |
| H | 0.70993479813579  | 3.02646710357285  | -1.69854989780086 |
| H | 0.29843602355213  | 7.46193139578611  | 0.34390583121885  |
| H | -1.51048418968341 | 8.71377825612204  | 1.49868047932051  |
| H | -1.85626820240110 | 6.97469945024165  | 1.45044653370107  |
| H | -1.28251740495917 | 7.72882459584302  | 2.95494027577164  |
| H | 0.86126777416247  | 9.53729350829791  | 1.56607444776016  |
| H | 1.16950813284221  | 8.60472178173838  | 3.04392740907467  |
| H | 2.20479038175971  | 8.38188170604861  | 1.62315324920509  |
| H | 0.94879323707412  | -2.29780585314584 | -1.18739293461508 |
| H | -0.10401794453640 | -4.13645658548600 | 0.26099147542925  |
| H | -0.69221475569305 | -1.27042958643793 | -2.74850675282678 |
| H | -1.33041976647914 | -1.34844579971732 | -1.09470572122079 |
| H | -0.74125237818062 | 0.19478697092161  | -1.75161947306327 |
| H | 1.77693360543230  | -1.04375816314771 | -3.14886052634706 |
| H | 1.81052648770974  | 0.45594902064459  | -2.20082649665893 |
| H | 2.89141907172740  | -0.88331290567315 | -1.77915299471072 |
| H | 1.59147657540696  | -5.18276751943799 | 1.73755765994842  |
| H | 1.61913754683090  | -3.41528202526946 | 1.88463204223921  |
| H | 0.86519144696857  | -4.40397122052798 | 3.15505115817029  |
| H | -0.54962772644883 | -6.38011085881929 | 1.19651094476727  |
| H | -1.34872493334246 | -5.65480522845986 | 2.60520914213236  |
| H | -2.05511416484105 | -5.46677200800190 | 0.99075406907942  |
| C | 9.92246897144108  | 8.59904503226494  | 9.38850941075707  |
| C | 11.17252024880836 | 9.35353986535911  | 9.85721713059599  |
| C | 8.72328196817110  | 8.97214932378609  | 10.26715650167265 |
| H | 10.11069974493244 | 7.52087613112786  | 9.49733101920052  |
| H | 8.95704844598161  | 8.78733946460228  | 11.31663778027339 |
| H | 8.47291046172562  | 10.02800363668624 | 10.14936948107197 |
| H | 7.84880306797590  | 8.37626336605964  | 10.00451392718841 |
| H | 11.38301147039629 | 9.12386438668894  | 10.90266229485150 |
| H | 12.03772389860494 | 9.06410572903167  | 9.25922879673055  |
| H | 11.02920211699635 | 10.43125098406351 | 9.76121501420736  |

# Stage 5

**Table S56: *i*-C<sub>4</sub>H<sub>9</sub>-CCCCT-AS addition *trans*-C<sub>4</sub>H<sub>8</sub> chain in polymer.**

| Atom | x                 | y                 | z                 |
|------|-------------------|-------------------|-------------------|
| C    | 0.92021454224437  | -1.25456038803889 | -0.01465837242144 |
| Al   | -0.32219785822000 | -1.69968609901573 | 1.45015136992300  |
| Cl   | 0.84673988008981  | -1.00314943150083 | 3.39976388334899  |
| Nd   | -0.66691429131303 | 1.32546436788001  | 3.71377119133919  |
| C    | -1.25197849969939 | -3.38211709090373 | 1.89610610798099  |
| Cl   | -1.95315016007371 | -0.06686545405604 | 1.60655721359049  |
| Cl   | 0.86018290103664  | 2.33428717390403  | 1.45871240391968  |
| Al   | -0.42561402146685 | 4.21794769676525  | 1.17114138507162  |
| C    | -1.61255661433568 | 3.94556029078458  | -0.38007290662505 |
| Cl   | -1.78981975503612 | 3.79818178424564  | 3.05722664228131  |
| C    | 0.73410953231692  | 5.74020234133422  | 1.66171430883449  |
| H    | 1.00956614686792  | -0.16132124824259 | -0.04596678445319 |
| H    | 1.91944640050547  | -1.63110012331171 | 0.24507780708113  |
| H    | -1.50738019173059 | -3.36364863195866 | 2.96442732292543  |
| H    | -2.21288633070701 | -3.38409423244574 | 1.36222230878060  |
| H    | 0.85437465326822  | 5.74389615710417  | 2.75356958492749  |
| H    | 1.73552427132776  | 5.55168210173656  | 1.25071015502946  |
| H    | -1.81965638065257 | 2.86930816124687  | -0.45369189752974 |
| H    | -2.58042785056213 | 4.42388869900686  | -0.17561869327742 |
| C    | 4.36329749586970  | 2.91959398996771  | 4.61949611629500  |
| H    | 5.19441801785832  | 2.20693486229064  | 4.57316030762163  |
| H    | 4.43119792101511  | 3.43720557809279  | 5.58180473314526  |
| C    | 1.04787504998923  | 2.48978351240472  | 7.03367947283644  |
| C    | 1.01300695002888  | 3.18869890429628  | 5.70433380036847  |
| C    | 1.84179809896143  | 3.03756544005545  | 4.65904221374745  |
| C    | 3.03081475021062  | 2.12881776855121  | 4.55000166004718  |
| H    | 3.02362109785715  | 1.37408067541886  | 5.33739932991450  |
| H    | 2.98581922742804  | 1.59605300921935  | 3.59526737839191  |
| H    | 1.69505188867893  | 3.69326746969240  | 3.80659670551717  |
| H    | 0.23844745145617  | 3.94970638373721  | 5.61335049271547  |
| H    | 1.42200015973559  | 3.18794411093330  | 7.79177543170340  |
| H    | 1.74465167485919  | 1.64894402146501  | 7.01722858877164  |
| C    | -0.35318582106147 | 1.99717076540236  | 7.42002227725720  |
| C    | -0.90694677646706 | 1.05252391441086  | 6.38163502348944  |
| C    | -2.21662595422340 | 1.07996270923273  | 5.92511275632425  |
| C    | -2.72978461654138 | 0.25447139648660  | 4.92766891039424  |
| H    | -0.31315966507035 | 1.52215629135974  | 8.40702266068094  |
| H    | -1.02300315007327 | 2.85783118491888  | 7.51768162190695  |
| H    | -0.35227620182421 | 0.11371368294929  | 6.26866179556741  |
| H    | -2.79987807829816 | 1.96466850351082  | 6.18301794449138  |
| H    | -2.32915467232814 | -0.75011975980185 | 4.79425733000384  |
| H    | -3.73437990653090 | 0.40165604128154  | 4.55567070847619  |
| C    | 4.83916364137304  | 6.71285732877128  | 5.47354165817422  |

|   |                   |                   |                   |
|---|-------------------|-------------------|-------------------|
| H | 5.42794384891269  | 7.29204251919761  | 4.75728509607733  |
| H | 4.37453753586570  | 7.41686514967969  | 6.17170794524137  |
| C | 4.51241890801848  | 3.90508740849176  | 3.48968653553131  |
| C | 4.23673361844288  | 5.20400554527720  | 3.53999889298963  |
| C | 3.71178596482357  | 5.96660423665376  | 4.72489744093572  |
| H | 4.87415337612060  | 3.47763246141811  | 2.55658042779392  |
| H | 4.41491363943621  | 5.81235382294647  | 2.65601171073986  |
| H | 2.98861341066771  | 6.70846299783663  | 4.37105723209698  |
| H | 3.19492617334409  | 5.30430793588417  | 5.42555727514406  |
| C | 8.79243690423375  | 6.88173032385758  | 5.20270533108092  |
| H | 9.37524105469475  | 6.49486349983823  | 6.04356093645601  |
| H | 9.47887097751236  | 7.04411321477063  | 4.36578099213896  |
| C | 5.69958565043719  | 5.75833613937690  | 6.25177623980946  |
| C | 6.93110212514126  | 5.36328950117868  | 5.94582291494793  |
| H | 5.22443988959121  | 5.35258042685154  | 7.14230212941506  |
| H | 7.43626354425326  | 4.66433060745272  | 6.60852545139658  |
| C | 7.75553693272932  | 5.81662700025224  | 4.77476806730594  |
| H | 8.29719102117827  | 4.95686163696380  | 4.36787503769973  |
| H | 7.12786049490349  | 6.22515905086420  | 3.97784603464417  |
| C | 8.12675405311778  | 8.18529548219543  | 5.54662887297863  |
| C | 7.81557162496330  | 8.62533166198195  | 6.76106283085870  |
| H | 7.85877662905027  | 8.79335286670695  | 4.68559770860728  |
| H | 7.33088729588462  | 9.59412962278880  | 6.85993722275718  |
| C | 8.09104816112700  | 7.93418692915187  | 8.06740547280001  |
| C | 9.20239230085536  | 8.66467090702949  | 8.84115476430741  |
| H | 7.17126343908304  | 7.93413739027686  | 8.66169960509153  |
| H | 8.38332187421107  | 6.89202495110214  | 7.90871765795117  |
| H | 10.09189227142235 | 8.71591870952184  | 8.20398191858408  |
| H | 8.88726330608469  | 9.69286945404077  | 9.05003476574706  |
| C | 0.54958366802310  | -1.77030095164226 | -1.41139962183536 |
| C | 1.56853278850593  | -1.26782171076151 | -2.44182913264893 |
| C | -0.86233623122860 | -1.34129563041286 | -1.81586365360888 |
| C | -0.50827599478820 | -4.68631446416638 | 1.57539092139190  |
| C | -1.36960558940865 | -5.89439602181536 | 1.96436633694169  |
| C | 0.84372670660920  | -4.75236645467914 | 2.28835152654270  |
| C | -1.08977140996678 | 4.45288930013374  | -1.73088978264247 |
| C | -2.08323291513818 | 4.10232527025667  | -2.84526586317087 |
| C | 0.27462277283642  | 7.13340620879126  | 1.20965086169071  |
| C | 1.28303558731485  | 8.19593080452185  | 1.66446291480306  |
| C | -1.11862836874691 | 7.46766631197376  | 1.74649690412047  |
| C | 0.28957307063070  | 3.87533774411791  | -2.05493664921616 |
| H | -1.00000852304626 | 5.55165416214367  | -1.69576154384231 |
| H | -1.73269022424280 | 4.48866950122121  | -3.80376941437408 |
| H | -2.19828045535045 | 3.01956446030461  | -2.92370667228985 |
| H | -3.05851859277231 | 4.54061715666696  | -2.62764148366257 |
| H | 0.64287448253241  | 4.24263997056577  | -3.01971913779978 |

|   |                   |                   |                   |
|---|-------------------|-------------------|-------------------|
| H | 1.01229682249185  | 4.17513172130822  | -1.28572405262108 |
| H | 0.25270396579807  | 2.78352688372260  | -2.09109078771582 |
| H | 0.23332190509952  | 7.16270520716684  | 0.10796674196888  |
| H | -1.42736605407301 | 8.46172572090348  | 1.41923768492432  |
| H | -1.84978152597574 | 6.73962484132289  | 1.37495480783652  |
| H | -1.12758480860002 | 7.44331719441964  | 2.83900329923314  |
| H | 0.98134292205615  | 9.18410801849941  | 1.31320418958091  |
| H | 1.34734243109232  | 8.21607325498650  | 2.75406387232310  |
| H | 2.27194875205338  | 7.96953286233107  | 1.26257381860022  |
| H | 0.58576058346818  | -2.87285943207594 | -1.41401608356439 |
| H | -0.32521088489568 | -4.74281689570344 | 0.48938666452231  |
| H | -1.10013856921397 | -1.69902708910205 | -2.81884044625628 |
| H | -1.59632085585674 | -1.76070423913784 | -1.11657532857698 |
| H | -0.95356555797911 | -0.25186068032657 | -1.80491969735955 |
| H | 1.33253024122538  | -1.65793487685515 | -3.43324646957682 |
| H | 1.55957356163960  | -0.17683586757968 | -2.48220608786205 |
| H | 2.57179531819561  | -1.59694216947872 | -2.16660375182207 |
| H | 1.35695226043370  | -5.68551393446932 | 2.05091580984025  |
| H | 1.47870940081301  | -3.91752776255242 | 1.96827020975759  |
| H | 0.71261642187051  | -4.69369496883539 | 3.37164703847017  |
| H | -0.85892737354711 | -6.82446308514386 | 1.70958443922125  |
| H | -1.57188777156818 | -5.88712005776313 | 3.03701942790994  |
| H | -2.32128103094862 | -5.86144859926431 | 1.43147539416847  |
| C | 9.57416300135569  | 7.95820603379074  | 10.15588008202057 |
| C | 10.86353779700564 | 8.56329620339256  | 10.72412135854158 |
| C | 8.44818083771569  | 8.05378469553266  | 11.19135507602327 |
| H | 9.75904608024591  | 6.89557524810778  | 9.94049460939055  |
| H | 8.75213534922742  | 7.56952645336650  | 12.12047446365575 |
| H | 8.21085799365560  | 9.09718530673931  | 11.40682029843490 |
| H | 7.54547796136446  | 7.55990024720549  | 10.83069045533407 |
| H | 11.14498660359421 | 8.05460474953262  | 11.64715489713321 |
| H | 11.68051864113732 | 8.45750421336200  | 10.00905309663484 |
| H | 10.72696333748599 | 9.62423422260777  | 10.94077174473301 |

# Stage 5

**Table S57: *i*-C<sub>4</sub>H<sub>9</sub>-TTTTT-AS addition *trans*-C<sub>4</sub>H<sub>8</sub> chain in polymer.**

| Atom | x                 | y                 | z                 |
|------|-------------------|-------------------|-------------------|
| C    | 1.44607163865036  | -4.50057773874558 | -4.72452178488955 |
| Al   | 2.35161442371850  | -3.35991217744180 | -3.39413147048455 |
| Cl   | 3.57334494664662  | -1.78790272525976 | -4.62220943155488 |
| Nd   | 2.43788005443267  | 0.46434118046490  | -3.35266498454904 |
| C    | 3.39942254711005  | -3.83157742618937 | -1.78750635791216 |
| Cl   | 0.82246801822227  | -1.77241915318237 | -2.63939386564808 |
| Cl   | 2.67350327537027  | 2.41010060667812  | -5.44649384144047 |
| Al   | 4.80097836017890  | 3.16694899500765  | -4.88012509610725 |
| C    | 4.58164584319465  | 4.80392959360932  | -3.79638254110016 |
| Cl   | 5.09022334335720  | 1.50193156630835  | -3.29415732461794 |
| C    | 5.93058555381764  | 2.83605449660262  | -6.46085183506562 |
| H    | 0.65884717784987  | -3.90559381880530 | -5.20510812324322 |
| H    | 2.15979610615580  | -4.74958967779756 | -5.52197704158292 |
| H    | 4.13377304521549  | -3.03661824269192 | -1.60024507873771 |
| H    | 2.71517578316529  | -3.81184877838818 | -0.92755048912857 |
| H    | 6.04293566996125  | 1.75144180680198  | -6.58046594810921 |
| H    | 5.38045013811734  | 3.18043172187561  | -7.34755818711939 |
| H    | 3.65569834417690  | 4.70369000892144  | -3.21306513288812 |
| H    | 5.39382062372905  | 4.83391600669192  | -3.05613942917484 |
| C    | -0.10962506167812 | -1.08316626707889 | -6.19499630023235 |
| H    | -0.64432166009337 | -1.98016159493716 | -6.53335955734453 |
| H    | 0.74260335144476  | -1.44246795828817 | -5.60705637712141 |
| C    | -1.05695037954588 | -0.24474227251623 | -5.31972463549182 |
| C    | -0.51293233143982 | 1.08826204434670  | -4.89127775416454 |
| C    | -0.63569306037613 | 1.62463996073055  | -3.67072490885201 |
| C    | -0.35333173499382 | 3.06039725920580  | -3.31075776369727 |
| H    | -1.29067677065106 | 3.62385525281719  | -3.40180667510908 |
| H    | 0.34275804145339  | 3.49843671058974  | -4.03037853080108 |
| H    | -1.08571792691370 | 1.01742631907968  | -2.88567242728568 |
| H    | -0.08359905134106 | 1.70079407130806  | -5.68127326607271 |
| H    | -1.97075505457187 | -0.04492962100494 | -5.89358285567975 |
| H    | -1.36054901117740 | -0.82345796744467 | -4.44455542999308 |
| C    | 0.18649739882100  | 3.21867638169791  | -1.87928219220375 |
| C    | 1.49146401191460  | 2.50016563768581  | -1.66052264920226 |
| C    | 1.62546607520644  | 1.36014149633134  | -0.90749120247786 |
| C    | 2.79260929675329  | 0.57049896635409  | -0.82107928197295 |
| H    | 0.29760539790420  | 4.28427086307816  | -1.65768964774920 |
| H    | -0.55981946124407 | 2.83329351604777  | -1.17691363792949 |
| H    | 2.39395945641442  | 3.03211341272383  | -1.97008456293468 |
| H    | 0.70241967044836  | 0.91379658032409  | -0.53787717637927 |
| H    | 3.75874450163817  | 1.06865000180523  | -0.85065299514922 |
| H    | 2.76399523463120  | -0.33435328103789 | -0.22644732337586 |
| C    | 3.67372527233108  | 0.58889587210089  | -8.85544085061823 |



|   |                   |                   |                   |
|---|-------------------|-------------------|-------------------|
| H | 3.97055627326390  | 1.29860019866573  | -9.63483977567539 |
| H | 3.78924954627967  | 1.08019036611220  | -7.88204377677826 |
| C | 2.19103258366904  | 0.22334633097386  | -9.06412690105042 |
| C | 1.63827095656364  | -0.49965886493884 | -7.86847755748904 |
| C | 0.40804049983451  | -0.33967008654516 | -7.39984892182444 |
| H | 2.10524386372247  | -0.41606817064432 | -9.95130816284579 |
| H | 1.61176038407775  | 1.13256870274299  | -9.25560844816547 |
| H | 2.32336617051849  | -1.19236291653474 | -7.38202013894774 |
| H | -0.29651164969868 | 0.33066776934761  | -7.88713882448119 |
| C | 4.54653198954589  | -0.63122528992916 | -8.93532149634799 |
| C | 5.12716200227378  | -1.21244486598187 | -7.89332656242835 |
| C | 5.96315903924193  | -2.45674319400513 | -8.00034483655814 |
| C | 7.32203959708358  | -2.30101801807113 | -7.28544241397348 |
| H | 7.77415407947637  | -1.34436457824769 | -7.56800116931702 |
| H | 7.98354694521807  | -3.10402881381057 | -7.62803655674042 |
| H | 5.01944240483647  | -0.79917593705351 | -6.89170734175159 |
| H | 4.65225412454171  | -1.05675072869601 | -9.93134281460727 |
| H | 6.13562634273265  | -2.70006861831376 | -9.05396073489532 |
| H | 5.42120433230918  | -3.29796065126487 | -7.54959284230385 |
| C | 0.83341328723078  | -5.80177609164969 | -4.18657808867153 |
| C | 0.12525194467123  | -6.55995286120446 | -5.31581138838849 |
| C | 7.16646905209618  | -2.39493358179691 | -5.79444418754825 |
| C | 7.31412519069771  | -1.37540729364433 | -4.95903142847610 |
| C | 7.09270993735117  | -1.47069790875663 | -3.47563594195618 |
| C | 8.12143374976004  | -0.65853260096628 | -2.67907462882729 |
| C | 7.68947736574617  | -0.42624947657700 | -1.22198998497677 |
| C | 7.67413443106831  | -1.72943081512570 | -0.41678701037253 |
| C | 4.11702807984228  | -5.18827371981475 | -1.81090824552604 |
| C | 4.86747908655908  | -5.41631468376400 | -0.49322676953218 |
| C | 4.55313886100987  | 6.14224574922046  | -4.54749915595444 |
| C | 4.35056095154043  | 7.29806783234667  | -3.55948083797238 |
| C | 7.31879766286477  | 3.48961708296801  | -6.46688292615784 |
| C | 8.07859280883794  | 3.08919340052629  | -7.73754476008811 |
| C | -0.14550522603403 | -5.53231632325977 | -3.04151951087683 |
| C | 5.08342391784958  | -5.29320846382793 | -2.99177309717298 |
| C | 8.13009383025619  | 3.10912650002624  | -5.22711253905352 |
| C | 3.45705855952504  | 6.16459269039122  | -5.61488724172126 |
| C | 8.61724226319567  | 0.59764240384088  | -0.55810882757711 |
| H | 6.88495019797259  | -3.37808942142073 | -5.42054580835620 |
| H | 7.58885019639766  | -0.38994567823064 | -5.33216308002200 |
| H | 6.09134879682346  | -1.07660777982456 | -3.25320003102506 |
| H | 7.10867248771433  | -2.52009656143737 | -3.16205852792270 |
| H | 9.09292550277361  | -1.16416170306564 | -2.70517284297902 |
| H | 8.24660685550696  | 0.31861405470460  | -3.16005629479942 |
| H | 5.52256279980787  | 6.29765276601344  | -5.04959545964816 |
| H | 4.36133647952316  | 8.25523718849918  | -4.08337326097720 |

|   |                   |                   |                   |
|---|-------------------|-------------------|-------------------|
| H | 3.39505967873851  | 7.19213359836603  | -3.04207266547148 |
| H | 5.14926714904802  | 7.29754116282438  | -2.81603206254751 |
| H | 3.44380374131263  | 7.12517921636356  | -6.13219141222511 |
| H | 3.63688037823006  | 5.37579513438292  | -6.35498025908747 |
| H | 2.47524782960680  | 5.99984108179362  | -5.16360970657173 |
| H | 7.20336829808019  | 4.58641967121937  | -6.47599803974747 |
| H | 9.10928681076301  | 3.59011345746505  | -5.24597770014619 |
| H | 7.60401306203599  | 3.43011633001665  | -4.31969752706798 |
| H | 8.27626391680705  | 2.02760145524262  | -5.17952782966100 |
| H | 9.05456990861648  | 3.57624562050742  | -7.76900027811014 |
| H | 8.22422050200228  | 2.00763785186167  | -7.76668123876584 |
| H | 7.51101272404922  | 3.38661835782383  | -8.62083057396980 |
| H | 1.63814893819716  | -6.45024008345896 | -3.80211536450390 |
| H | 3.36775670213122  | -5.99175891710233 | -1.91097222256437 |
| H | -0.56848610593801 | -6.46732010943882 | -2.67055957396036 |
| H | 0.37207104480048  | -5.03527475684953 | -2.21181916693103 |
| H | -0.96380430679933 | -4.88940032575188 | -3.37547727294480 |
| H | -0.27989205932962 | -7.50334874864771 | -4.94597538028973 |
| H | -0.69288301182355 | -5.96084848915574 | -5.72007898253916 |
| H | 0.82973572128028  | -6.77426449031005 | -6.12103463570078 |
| H | 5.55890280052772  | -6.27506143826310 | -3.01331763363387 |
| H | 4.54354245730170  | -5.14881571279811 | -3.93563979255140 |
| H | 5.86360753352538  | -4.53246626611409 | -2.91853286186569 |
| H | 5.34353577652270  | -6.39825441390811 | -0.48997047306996 |
| H | 5.63659324168412  | -4.65378833463502 | -0.35772680714823 |
| H | 4.17349196524990  | -5.36203632138591 | 0.34710709163907  |
| H | 6.67038222939938  | -0.01046514146733 | -1.22736650128236 |
| H | 7.38684051170445  | -1.52956069887868 | 0.61661280215976  |
| H | 6.95637730594153  | -2.43364199889030 | -0.83871651066854 |
| H | 8.66060428040608  | -2.19662368521812 | -0.41806236287536 |
| H | 8.30186744661127  | 0.78368989269287  | 0.46962532940267  |
| H | 9.64617600727460  | 0.23365265042037  | -0.54444768883281 |
| H | 8.59043789595864  | 1.54253461193809  | -1.10356887851428 |

**Table S58.** Changes in the activation energy and full energy under standard conditions (kJ/mol) as a result of the introduction of 1,3-butadiene into the growing polymer chain.

| Initial structure                                  | $\Delta E^\ddagger$<br>( <i>trans-cis</i> ) | $\Delta E$<br>( <i>trans-cis</i> ) | $\Delta E^\ddagger$<br>(polymer) | $\Delta E^\ddagger$<br>(total) | $\Delta E$<br>(polymer) | Product                                           |
|----------------------------------------------------|---------------------------------------------|------------------------------------|----------------------------------|--------------------------------|-------------------------|---------------------------------------------------|
| I stage                                            |                                             |                                    |                                  |                                |                         |                                                   |
| <i>i</i> -C <sub>4</sub> H <sub>9</sub> -AS-T      | 44.0                                        | 6.0                                | 39.2                             | 45.2                           | -72.8                   | <i>i</i> -C <sub>4</sub> H <sub>9</sub> -C-AS     |
| <i>i</i> -C <sub>4</sub> H <sub>9</sub> -AS-T      | -                                           | -                                  | 50.9                             | 50.9                           | -78.5                   | <i>i</i> -C <sub>4</sub> H <sub>9</sub> -T-AS     |
| II stage                                           |                                             |                                    |                                  |                                |                         |                                                   |
| <i>i</i> -C <sub>4</sub> H <sub>9</sub> -C-AS-T    | 43.9                                        | 5.9                                | 36.7                             | 42.6                           | -42.0                   | <i>i</i> -C <sub>4</sub> H <sub>9</sub> -CC-AS    |
| <i>i</i> -C <sub>4</sub> H <sub>9</sub> -C-AS-T    | -                                           | -                                  | 25.8                             | 25.8                           | -64.8                   | <i>i</i> -C <sub>4</sub> H <sub>9</sub> -CT-AS    |
| <i>i</i> -C <sub>4</sub> H <sub>9</sub> -T-AS-T    | 44.3                                        | 23.2                               | 65.1                             | 88.3                           | -22.0                   | <i>i</i> -C <sub>4</sub> H <sub>9</sub> -TC-AS    |
| <i>i</i> -C <sub>4</sub> H <sub>9</sub> -T-AS-T    | -                                           | -                                  | 63.2                             | 63.2                           | -53.7                   | <i>i</i> -C <sub>4</sub> H <sub>9</sub> -TT-AS    |
| III stage                                          |                                             |                                    |                                  |                                |                         |                                                   |
| <i>i</i> -C <sub>4</sub> H <sub>9</sub> -CC-AS-T   | 36.2                                        | 18.0                               | 40.7                             | 58.7                           | -55.2                   | <i>i</i> -C <sub>4</sub> H <sub>9</sub> -CCC-AS   |
| <i>i</i> -C <sub>4</sub> H <sub>9</sub> -CC-AS-T   | -                                           | -                                  | 48.2                             | 48.2                           | -90.4                   | <i>i</i> -C <sub>4</sub> H <sub>9</sub> -CCT-AS   |
| <i>i</i> -C <sub>4</sub> H <sub>9</sub> -TT-AS-T   | -                                           | -                                  | 65.2                             | 65.2                           | -56.9                   | <i>i</i> -C <sub>4</sub> H <sub>9</sub> -TTT-AS   |
| IV stage                                           |                                             |                                    |                                  |                                |                         |                                                   |
| <i>i</i> -C <sub>4</sub> H <sub>9</sub> -CCC-AS-T  | 30.3                                        | 8.0                                | 43.3                             | 51.3                           | -80.0                   | <i>i</i> -C <sub>4</sub> H <sub>9</sub> -CCCC-AS  |
| <i>i</i> -C <sub>4</sub> H <sub>9</sub> -CCC-AS-T  | -                                           | -                                  | 45.7                             | 45.7                           | -41.8                   | <i>i</i> -C <sub>4</sub> H <sub>9</sub> -CCCT-AS  |
| <i>i</i> -C <sub>4</sub> H <sub>9</sub> -TTT-AS-T  | -                                           | -                                  | 68.7                             | 68.7                           | -52.7                   | <i>i</i> -C <sub>4</sub> H <sub>9</sub> -TTTT-AS  |
| V stage                                            |                                             |                                    |                                  |                                |                         |                                                   |
| <i>i</i> -C <sub>4</sub> H <sub>9</sub> -CCCC-AS-T | 31.6                                        | 13.6                               | 44.3                             | 57.9                           | -59.3                   | <i>i</i> -C <sub>4</sub> H <sub>9</sub> -CCCCC-AS |
| <i>i</i> -C <sub>4</sub> H <sub>9</sub> -CCCC-AS-T | -                                           | -                                  | 72.3                             | 72.3                           | -67.9                   | <i>i</i> -C <sub>4</sub> H <sub>9</sub> -CCCCT-AS |
| <i>i</i> -C <sub>4</sub> H <sub>9</sub> -TTTT-AS-T | -                                           | -                                  | 57.0                             | 57.0                           | -65.5                   | <i>i</i> -C <sub>4</sub> H <sub>9</sub> -TTTTT-AS |

**Table S59.** Changes in the activation energy and Entalphy under standard conditions (kJ/mol) as a result of the introduction of 1,3-butadiene into the growing polymer chain.

| Initial structure                                  | $\Delta H^\ddagger$<br>( <i>trans-cis</i> ) | $\Delta H$<br>( <i>trans-cis</i> ) | $\Delta H^\ddagger$<br>(polymer) | $\Delta H^\ddagger$<br>(total) | $\Delta H$<br>(polymer) | Product                                           |
|----------------------------------------------------|---------------------------------------------|------------------------------------|----------------------------------|--------------------------------|-------------------------|---------------------------------------------------|
| I stage                                            |                                             |                                    |                                  |                                |                         |                                                   |
| <i>i</i> -C <sub>4</sub> H <sub>9</sub> -AS-T      | 40.3                                        | 7.4                                | 39.1                             | 46.5                           | -69.4                   | <i>i</i> -C <sub>4</sub> H <sub>9</sub> -C-AS     |
| <i>i</i> -C <sub>4</sub> H <sub>9</sub> -AS-T      | -                                           | -                                  | 45.9                             | 45.9                           | -70.0                   | <i>i</i> -C <sub>4</sub> H <sub>9</sub> -T-AS     |
| II stage                                           |                                             |                                    |                                  |                                |                         |                                                   |
| <i>i</i> -C <sub>4</sub> H <sub>9</sub> -C-AS-T    | 40.3                                        | 7.4                                | 35.8                             | 43.2                           | -34.4                   | <i>i</i> -C <sub>4</sub> H <sub>9</sub> -CC-AS    |
| <i>i</i> -C <sub>4</sub> H <sub>9</sub> -C-AS-T    | -                                           | -                                  | 24.9                             | 24.9                           | -58.5                   | <i>i</i> -C <sub>4</sub> H <sub>9</sub> -CT-AS    |
| <i>i</i> -C <sub>4</sub> H <sub>9</sub> -T-AS-T    | 40.8                                        | 23.7                               | 64.9                             | 88.5                           | -15.1                   | <i>i</i> -C <sub>4</sub> H <sub>9</sub> -TC-AS    |
| <i>i</i> -C <sub>4</sub> H <sub>9</sub> -T-AS-T    | -                                           | -                                  | 62.1                             | 62.1                           | -47.5                   | <i>i</i> -C <sub>4</sub> H <sub>9</sub> -TT-AS    |
| III stage                                          |                                             |                                    |                                  |                                |                         |                                                   |
| <i>i</i> -C <sub>4</sub> H <sub>9</sub> -CC-AS-T   | 24.6                                        | 14.0                               | 51.7                             | 55.7                           | -38.5                   | <i>i</i> -C <sub>4</sub> H <sub>9</sub> -CCC-AS   |
| <i>i</i> -C <sub>4</sub> H <sub>9</sub> -CC-AS-T   | -                                           | -                                  | 58.2                             | 58.2                           | -70.6                   | <i>i</i> -C <sub>4</sub> H <sub>9</sub> -CCT-AS   |
| <i>i</i> -C <sub>4</sub> H <sub>9</sub> -TT-AS-T   | -                                           | -                                  | 77.5                             | 77.5                           | -40.9                   | <i>i</i> -C <sub>4</sub> H <sub>9</sub> -TTT-AS   |
| IV stage                                           |                                             |                                    |                                  |                                |                         |                                                   |
| <i>i</i> -C <sub>4</sub> H <sub>9</sub> -CCC-AS-T  | 27.2                                        | 6.6                                | 43.8                             | 50.4                           | -77.3                   | <i>i</i> -C <sub>4</sub> H <sub>9</sub> -CCCC-AS  |
| <i>i</i> -C <sub>4</sub> H <sub>9</sub> -CCC-AS-T  | -                                           | -                                  | 48.2                             | 48.2                           | -37.6                   | <i>i</i> -C <sub>4</sub> H <sub>9</sub> -CCCT-AS  |
| <i>i</i> -C <sub>4</sub> H <sub>9</sub> -TTT-AS-T  | -                                           | -                                  | 68.1                             | 68.1                           | -47.0                   | <i>i</i> -C <sub>4</sub> H <sub>9</sub> -TTTT-AS  |
| V stage                                            |                                             |                                    |                                  |                                |                         |                                                   |
| <i>i</i> -C <sub>4</sub> H <sub>9</sub> -CCCC-AS-T | 27.3                                        | 9.9                                | 43.6                             | 53.5                           | -52.4                   | <i>i</i> -C <sub>4</sub> H <sub>9</sub> -CCCCC-AS |
| <i>i</i> -C <sub>4</sub> H <sub>9</sub> -CCCC-AS-T | -                                           | -                                  | 71.0                             | 71.0                           | -62.4                   | <i>i</i> -C <sub>4</sub> H <sub>9</sub> -CCCCT-AS |
| <i>i</i> -C <sub>4</sub> H <sub>9</sub> -TTTT-AS-T | -                                           | -                                  | 60.0                             | 60.0                           | -58.1                   | <i>i</i> -C <sub>4</sub> H <sub>9</sub> -TTTTT-AS |
